# Supplementary material for: Protein combined with certain dietary fibers increases butyrate production in gut microbiota fermentation
Source: Royal Society of Chemistry journal article supplement (doi:10.1039/d3fo04187e), 2024-01-01
Supplement: d3fo04187e1.xlsx [file d3fo04187e1.xlsx]

## Sheet: raw OTU table
Group	0a1	0a1rep	0a2	0a2rep	0a3	0a3rep	0b1	0b1r	0b1rep	0b1rrep	0b2	0b2rep	0b3	0b3rep	24a1	24a1rep	24a2	24a2rep	24a3	24a3rep	24b1	24b1rep	24b2	24b2rep	24b3	24b3rep	FOS100	FOS100	FOS100	FOS75	FOS75	FOS75	FOS50	FOS50	FOS50	FOS25	FOS25	FOS25	WBPS100	WBPS100	WBPS100	WBPS75	WBPS75	WBPS75	WBPS50	WBPS50	WBPS50	WBPS25	WBPS25
Otu00001	1004	1038	1126	1107	1111	1084	1397	1318	1336	1243	1396	1334	1272	1271	1388	1480	1510	1455	1363	1402	1482	1568	1483	1493	1385	1483	2568	2697	2260	4594	4438	4002	3128	3437	3157	2422	2431	2159	2254	2202	2144	1966	1922	1827	1801	1759	1827	1757	1770
Otu00002	2788	2761	2680	2625	2731	2921	2594	2569	2669	2675	2527	2485	2734	2719	2951	2955	2957	3074	3188	3014	1207	1191	1151	1155	1291	1252	4394	4635	5101	4382	4534	4695	4068	3928	4332	3552	3311	3395	1839	1760	1803	1562	1582	1743	1850	1770	1615	1625	1711
Otu00003	1102	780	1053	1076	1278	1248	1167	1082	1109	1082	865	896	1181	840	867	822	812	867	1004	1022	632	646	611	594	503	699	2174	2134	2322	985	652	1103	863	752	1152	787	770	897	1195	584	1012	969	986	907	915	847	825	751	673
Otu00004	1130	1050	1047	1083	956	1049	893	1005	993	1001	977	1001	894	948	404	349	387	413	386	368	299	240	260	205	255	250	1624	1653	1582	1964	1916	1851	1517	1481	1646	1420	1082	1249	753	875	801	734	660	630	494	508	507	359	388
Otu00005	988	948	982	952	935	928	977	990	1027	1029	966	1056	947	1015	982	946	968	959	881	915	367	319	369	344	319	331	278	317	255	306	372	298	247	386	297	314	431	373	274	290	293	297	297	309	287	329	297	290	322
Otu00006	1165	1071	1044	1050	1153	1118	1074	1057	1083	1034	1035	1094	1029	1107	1023	1067	1089	1099	1087	1119	341	347	363	344	423	376	492	453	516	368	350	403	373	337	364	317	346	371	1415	1176	1286	1003	986	1141	917	875	837	618	592
Otu00007	815	772	740	730	769	768	709	788	739	755	804	761	722	681	555	534	550	558	527	518	135	162	135	124	130	121	1285	1317	1107	1685	1690	1503	1660	1617	1598	1126	1057	1053	348	443	434	409	377	395	373	304	326	256	268
Otu00008	732	751	696	703	649	642	655	631	608	662	710	690	642	608	271	262	299	283	223	213	247	266	268	220	272	228	1004	996	994	867	787	874	944	829	816	685	617	716	1131	1119	1090	648	658	663	480	452	563	421	371
Otu00009	460	513	478	477	429	428	503	507	468	494	483	542	488	484	365	409	389	397	370	374	147	155	148	153	159	158	174	185	145	132	188	134	143	159	120	122	210	149	146	139	164	138	132	126	108	142	139	118	133
Otu00010	16	16	8	13	10	15	17	10	21	15	16	10	24	19	891	964	852	804	829	760	1590	1541	1532	1539	1473	1496	79	53	68	234	213	220	344	331	387	651	641	627	345	377	313	643	614	604	934	918	848	1221	1062
Otu00011	260	273	219	238	209	239	197	212	190	204	191	254	201	199	272	275	258	210	245	241	1441	1437	1495	1511	1602	1421	24	25	19	442	566	457	721	654	601	846	808	819	76	82	83	387	331	295	656	570	582	1016	972
Otu00012	1426	1563	1349	1464	1575	1571	1324	1364	1388	1427	1363	1429	1375	1441	516	478	474	458	538	491	179	183	159	176	166	191	556	585	565	262	280	283	219	273	188	194	188	179	589	676	670	670	545	504	405	395	381	268	295
Otu00013	487	521	482	478	482	474	524	487	535	487	513	498	492	486	550	440	485	508	479	508	358	320	328	354	341	353	396	398	531	492	575	632	726	633	779	879	930	988	482	508	503	591	552	497	532	542	553	463	392
Otu00014	322	360	377	368	532	492	412	350	357	357	348	328	380	413	445	444	430	458	576	618	266	299	255	273	369	378	1283	1181	967	342	250	488	727	365	605	726	558	902	515	504	549	480	606	722	670	705	640	678	499
Otu00015	711	703	706	697	647	656	683	631	679	640	709	641	626	636	607	604	605	592	574	526	273	269	264	282	269	249	914	861	844	445	501	431	666	593	552	416	418	386	319	366	316	297	295	288	254	256	237	265	248
Otu00016	138	137	141	178	146	126	117	123	118	113	156	159	124	127	99	107	98	120	82	78	1055	1061	1056	1121	1046	1011	43	58	26	34	205	32	201	437	144	693	941	577	73	111	93	192	414	363	390	750	639	835	951
Otu00017	414	385	349	345	378	345	338	386	377	363	347	363	349	356	327	275	303	311	270	315	111	119	129	110	132	111	179	187	185	85	122	121	113	110	128	111	118	110	568	593	566	506	453	387	351	337	325	185	206
Otu00018	206	239	251	245	241	230	200	206	205	182	184	194	250	230	299	322	326	278	286	282	809	825	724	719	679	662	40	42	65	111	163	153	174	324	222	456	587	542	185	143	187	310	331	368	548	600	595	796	813
Otu00019	325	308	292	304	283	251	325	282	276	271	300	276	325	291	680	585	634	617	690	650	568	533	579	609	496	550	209	155	224	296	217	242	316	271	319	341	329	331	449	397	363	444	461	398	511	423	408	467	426
Otu00020	1	5	6	2	4	5	6	3	7	6	3	4	0	5	58	72	68	54	75	59	1216	1216	1427	1533	1433	1464	0	0	1	18	13	24	72	93	83	310	418	320	39	36	54	276	262	309	523	576	537	893	946
Otu00021	561	540	491	539	440	472	429	449	453	424	438	470	400	394	540	537	527	556	482	434	182	163	189	156	197	175	616	562	540	792	709	718	557	523	594	457	350	372	274	334	267	196	229	186	165	159	169	179	162
Otu00022	145	159	154	144	119	133	143	146	145	130	121	132	153	145	191	187	184	179	161	135	666	727	748	721	669	703	32	42	40	109	145	101	131	200	94	192	247	181	181	181	196	381	396	413	505	584	535	652	743
Otu00023	200	192	211	217	253	225	116	148	134	150	139	132	190	165	273	260	253	255	341	296	501	496	419	403	470	453	67	55	89	82	104	119	209	243	272	454	430	464	117	130	155	204	199	176	260	297	297	345	402
Otu00024	82	83	90	102	113	111	87	109	102	94	99	107	102	113	136	161	138	152	143	125	255	268	290	270	257	290	50	42	48	57	40	44	63	69	78	115	106	133	483	417	451	402	383	417	313	317	376	309	314
Otu00025	91	410	77	89	122	103	26	109	72	77	75	68	99	468	361	354	332	387	464	464	39	40	33	56	278	49	681	583	650	250	179	324	254	205	306	239	234	258	439	211	363	334	353	377	379	355	337	331	275
Otu00026	334	364	368	365	361	354	416	373	412	397	421	413	413	402	429	437	449	463	425	466	206	201	222	224	197	233	140	124	120	116	98	104	107	115	131	127	96	119	229	209	194	196	193	181	210	174	193	186	172
Otu00027	330	304	314	273	263	273	301	310	290	295	318	265	291	295	288	289	302	273	281	305	221	220	192	172	200	208	328	368	395	147	200	173	161	179	174	167	187	185	165	134	145	191	182	180	220	206	232	202	251
Otu00028	287	259	270	245	265	236	255	244	216	224	176	201	262	230	452	438	466	397	481	496	242	223	270	215	227	207	109	81	97	100	119	128	156	157	165	150	142	147	128	118	108	137	130	115	145	139	123	192	159
Otu00029	0	1	0	1	0	0	0	0	0	0	0	0	0	1	0	0	0	0	0	3	0	0	0	0	0	0	0	0	0	0	0	0	0	0	0	0	0	0	29	22	14	23	23	17	10	13	4	7	5
Otu00030	506	489	692	721	537	489	781	767	747	770	843	810	812	728	69	75	58	63	72	78	39	34	15	18	14	27	16	14	9	123	90	150	153	126	154	69	109	91	86	67	103	89	87	81	70	77	63	57	47
Otu00031	6	8	8	6	5	7	8	12	9	6	6	7	11	7	6	6	5	4	10	7	4	3	0	2	3	4	0	1	2	0	0	0	1	1	0	0	0	2	1083	1167	1393	923	867	899	771	768	680	518	528
Otu00032	56	56	60	68	70	64	61	53	55	56	70	45	52	62	40	37	45	39	25	47	8	12	11	15	9	10	3	1	5	2	0	1	3	4	2	1	5	4	9	7	4	11	7	9	7	14	11	9	10
Otu00033	439	416	399	430	369	401	414	398	403	403	413	382	376	381	408	394	385	391	346	336	129	102	118	126	120	122	137	150	156	269	231	221	146	134	147	119	118	135	47	50	64	56	47	59	73	51	85	103	89
Otu00034	25	22	19	27	18	30	23	24	29	29	22	28	25	22	15	37	25	21	22	22	11	12	11	5	10	17	15	8	14	10	3	6	5	9	8	11	6	9	797	1105	855	676	861	916	506	689	875	463	394
Otu00035	39	23	23	22	34	13	19	21	23	16	22	23	25	27	44	58	68	62	50	44	287	259	332	357	322	332	203	174	266	172	188	188	209	195	203	215	202	219	247	280	258	297	263	279	248	268	231	243	225
Otu00036	39	48	37	38	47	47	40	40	36	45	41	44	35	55	30	48	42	29	51	40	463	452	401	390	482	454	37	40	41	39	61	33	103	109	109	313	301	331	39	40	39	96	84	108	204	204	177	290	319
Otu00037	288	270	267	292	256	283	241	268	282	255	278	278	213	257	148	143	128	138	128	145	106	94	101	112	106	124	169	181	160	196	210	223	202	192	210	227	180	189	144	134	147	142	129	105	115	90	74	118	120
Otu00038	134	148	154	144	160	155	134	138	138	144	136	130	161	143	150	142	137	164	160	186	51	52	51	52	50	63	44	43	38	55	83	90	72	64	63	113	93	103	191	178	157	139	124	144	90	76	60	75	76
Otu00039	119	110	115	110	90	117	114	112	95	112	110	106	102	105	114	106	112	97	102	100	171	163	156	138	146	141	97	137	143	240	365	273	351	364	348	330	281	311	122	111	106	126	120	105	125	107	119	122	129
Otu00040	178	185	176	160	187	197	155	173	170	161	153	151	158	170	144	144	136	146	159	142	40	32	46	33	48	32	302	316	384	579	618	576	578	604	494	247	228	217	99	143	98	103	90	80	59	63	60	45	39
Otu00041	13	13	13	27	20	16	8	12	14	20	24	18	22	12	13	18	10	13	17	16	606	597	443	440	394	393	3	3	1	4	1	1	59	60	47	173	172	143	10	7	12	134	131	132	271	276	269	417	501
Otu00042	82	89	80	92	75	75	74	70	84	77	83	83	55	76	94	75	80	72	48	61	344	305	278	284	271	314	25	21	29	32	60	36	223	194	163	212	211	175	37	46	37	98	96	91	176	148	159	262	226
Otu00043	73	84	87	74	89	98	115	105	112	107	101	97	84	94	80	62	73	68	87	93	70	65	70	67	112	83	348	346	342	112	109	151	121	78	139	117	107	125	113	60	97	77	84	109	95	63	83	94	71
Otu00044	320	291	315	278	282	269	268	300	305	267	301	281	267	264	307	326	312	343	297	279	131	116	134	118	118	114	114	117	116	81	76	94	74	75	81	97	98	95	92	83	95	84	70	87	93	95	88	113	104
Otu00045	173	165	215	223	210	200	180	171	172	177	150	155	241	223	248	229	239	235	304	318	128	128	125	120	172	147	65	55	69	53	53	87	76	78	85	89	95	117	133	83	91	124	108	104	117	102	118	114	102
Otu00046	30	31	32	37	28	32	22	18	18	25	28	31	33	27	21	19	33	15	36	22	15	5	8	7	6	8	7	3	2	3	3	5	8	4	8	10	9	8	4	6	4	7	10	5	4	4	4	11	10
Otu00047	0	0	0	2	0	0	0	0	0	0	0	2	0	0	26	19	20	0	0	0	505	507	496	501	450	505	5	2	5	29	22	31	84	87	99	206	206	193	19	8	17	92	91	81	146	134	157	259	261
Otu00048	70	63	53	58	70	69	99	94	94	91	80	79	75	88	98	82	92	97	111	126	134	139	133	127	131	127	137	180	139	134	122	107	126	121	117	121	110	104	234	196	197	232	234	271	205	191	179	146	173
Otu00049	0	0	0	0	0	0	0	1	0	0	0	0	0	0	0	1	0	0	0	0	0	0	0	0	0	0	0	0	0	0	0	0	0	0	0	0	0	0	825	1134	1007	561	617	688	292	361	425	130	129
Otu00050	185	170	144	170	139	140	131	128	117	131	129	172	144	146	82	80	94	122	73	83	26	37	28	39	36	44	155	131	144	49	52	43	64	96	65	121	112	91	107	95	115	94	100	97	98	74	91	64	71
Otu00051	46	48	59	42	52	40	46	61	59	39	37	46	45	56	76	70	82	78	74	65	182	174	175	176	151	141	22	38	20	36	45	30	48	66	39	108	131	113	79	84	94	96	118	111	127	149	131	162	201
Otu00052	25	22	30	34	33	28	38	46	38	46	36	40	44	52	37	53	42	46	39	38	39	40	56	45	50	29	92	103	66	138	140	105	89	94	62	68	72	64	90	54	58	56	50	63	56	44	65	50	45
Otu00053	228	219	176	190	160	186	189	214	192	182	196	198	206	205	252	315	277	318	244	255	74	84	80	75	63	85	38	36	38	26	22	24	35	29	39	42	37	44	49	35	32	51	48	32	62	54	57	69	60
Otu00054	103	87	163	147	113	98	159	148	154	145	141	133	140	173	161	172	180	176	146	145	81	87	96	79	93	97	40	35	37	42	46	59	56	53	82	65	71	100	72	58	73	83	71	77	82	74	74	90	89
Otu00055	61	55	61	54	52	55	58	47	64	72	60	63	51	51	86	95	94	73	74	85	32	42	42	35	31	34	66	59	55	27	34	57	31	37	35	36	42	56	94	106	109	81	83	102	87	80	87	73	64
Otu00056	0	0	0	0	0	0	0	0	0	0	0	0	0	0	0	1	0	0	0	0	600	565	770	881	694	661	0	0	0	0	0	1	1	0	2	1	6	6	0	0	0	41	21	29	47	70	42	153	162
Otu00057	181	182	155	171	189	182	187	193	174	187	196	157	172	152	83	67	85	86	75	73	52	48	38	31	47	39	127	144	136	78	65	69	106	110	97	79	80	87	42	37	31	21	32	36	35	57	37	24	27
Otu00058	56	63	90	85	90	96	89	113	98	108	119	105	144	147	99	107	124	130	112	118	75	82	94	91	92	114	20	17	12	18	16	13	19	19	19	45	49	42	148	131	145	115	118	96	104	91	107	89	76
Otu00059	154	162	159	173	150	125	165	140	158	154	186	185	137	141	238	198	237	217	216	197	56	63	53	50	58	55	42	29	27	28	19	15	22	20	39	45	36	36	44	38	37	43	27	28	42	41	42	51	48
Otu00060	207	166	188	148	170	149	147	151	156	164	144	162	150	150	147	145	144	150	172	111	61	70	61	66	67	55	26	22	27	24	28	34	37	35	39	40	39	43	38	45	41	45	49	40	58	50	41	48	60
Otu00061	0	1	0	0	1	0	0	1	0	0	0	0	0	1	4	5	2	6	2	3	436	436	432	480	464	452	23	25	21	14	5	15	8	10	11	28	18	27	16	8	12	38	39	39	75	84	74	194	135
Otu00062	11	23	15	18	26	17	19	17	33	28	19	20	14	21	14	14	14	8	16	14	168	191	176	192	190	212	20	33	17	28	29	28	58	67	47	105	110	129	5	9	7	50	36	46	84	77	72	170	147
Otu00063	0	0	2	0	1	1	1	1	0	1	5	1	1	1	1	3	0	1	1	0	2	0	0	0	0	0	0	1	0	0	0	0	0	0	0	1	1	0	156	164	165	191	117	119	138	119	101	51	79
Otu00064	33	23	39	21	36	20	25	30	23	28	27	24	27	36	25	15	25	15	18	13	9	5	5	2	10	8	30	58	40	19	13	10	11	14	15	18	14	11	253	289	263	164	230	206	104	128	109	79	100
Otu00065	31	48	36	34	33	37	47	42	49	53	46	39	31	42	47	43	62	62	38	45	215	228	185	190	200	219	17	13	9	13	13	14	48	44	41	72	75	56	12	10	13	44	49	34	94	102	68	155	113
Otu00066	43	52	48	46	71	53	58	67	50	55	52	65	53	54	62	81	65	75	74	58	36	38	28	22	27	35	147	132	134	138	139	134	134	119	161	119	119	114	26	35	33	28	24	21	30	20	18	31	15
Otu00067	78	105	106	86	95	94	92	79	93	89	90	91	95	108	74	94	89	87	99	83	21	23	22	19	29	27	40	34	41	1	4	3	6	9	5	15	15	22	163	148	176	158	131	137	98	105	105	64	57
Otu00068	27	30	34	35	16	27	44	42	39	29	41	33	32	32	21	15	15	13	7	4	26	24	19	16	29	23	0	0	0	3	4	2	40	51	52	244	269	230	13	23	27	30	68	71	63	60	60	51	49
Otu00069	3	2	0	2	3	4	8	4	3	4	5	6	3	5	111	96	97	79	89	84	53	65	69	68	47	39	9	9	6	110	137	125	83	139	49	53	115	71	30	43	34	32	86	55	50	64	62	36	56
Otu00070	139	129	100	98	99	109	109	128	103	124	112	112	105	77	141	118	96	93	79	75	44	41	41	51	32	32	21	14	22	11	15	17	17	20	15	22	20	24	47	42	33	50	24	29	41	18	38	47	45
Otu00071	36	41	36	26	33	36	28	20	31	29	41	32	37	41	130	142	170	168	134	162	85	85	68	68	53	69	23	17	21	18	17	22	18	29	20	26	39	53	40	47	44	40	41	39	48	41	46	59	48
Otu00072	27	34	21	20	30	31	29	18	29	21	31	26	21	22	32	42	31	30	44	35	153	169	159	146	145	161	9	6	5	4	5	15	24	23	30	38	49	40	9	9	5	31	34	29	92	85	66	112	89
Otu00073	47	50	140	145	76	89	65	68	78	80	126	112	86	63	145	122	165	176	116	144	44	39	50	61	39	44	8	9	8	11	12	4	10	22	13	26	42	21	10	18	14	10	17	33	24	40	39	21	41
Otu00074	20	15	29	25	26	19	29	23	19	27	34	16	32	23	22	24	27	21	18	26	4	2	8	8	8	7	3	3	2	3	0	2	1	3	3	3	1	3	4	2	5	7	6	1	4	5	4	3	3
Otu00075	0	1	0	0	0	0	0	1	0	0	0	0	0	0	0	2	0	0	0	0	0	0	0	0	0	0	0	0	0	0	0	0	0	0	0	0	0	0	236	577	24	433	496	367	156	190	246	62	52
Otu00076	1	1	0	5	1	1	2	0	2	3	1	1	2	1	2	1	1	2	1	1	0	0	1	0	1	0	2	4	0	0	0	0	1	0	0	0	0	1	90	127	222	454	327	370	321	223	264	73	109
Otu00077	23	27	35	51	54	46	102	125	136	123	115	114	79	76	144	156	132	109	154	151	25	22	38	47	43	46	8	13	7	9	13	7	12	15	4	14	22	15	15	36	24	17	30	26	22	61	35	31	56
Otu00078	91	88	68	71	91	86	76	85	77	74	71	76	76	83	88	91	110	81	84	100	31	26	22	22	35	30	17	18	14	10	7	8	6	10	5	20	14	18	68	74	72	89	71	87	76	63	87	59	52
Otu00079	1	3	2	1	1	1	1	1	0	1	5	0	1	1	3	2	1	3	1	1	1	1	0	2	0	1	0	3	2	0	1	0	1	1	0	0	0	0	232	172	198	242	224	296	220	217	185	76	163
Otu00080	120	116	111	112	103	132	116	96	100	130	107	116	112	106	48	50	58	57	46	61	18	15	19	16	18	24	20	18	13	12	12	12	9	14	23	17	14	19	12	12	19	18	18	24	14	13	10	20	14
Otu00081	80	79	117	111	89	95	80	80	92	90	99	86	96	82	21	20	15	25	33	30	15	18	12	19	15	22	5	9	9	2	5	3	4	9	1	11	16	22	63	84	86	76	70	85	41	49	67	40	37
Otu00082	91	68	71	72	56	67	65	86	74	82	79	93	65	78	81	72	65	76	89	76	35	33	41	41	31	32	10	22	6	17	9	12	22	18	20	24	22	29	26	32	42	33	52	41	30	27	34	39	31
Otu00083	72	62	64	72	81	86	70	60	54	68	78	57	90	69	91	78	87	82	80	97	25	25	20	23	33	37	26	23	27	32	13	12	25	19	21	20	20	15	63	45	53	49	45	57	46	28	40	29	35
Otu00084	11	12	12	14	10	16	8	8	16	18	13	19	21	9	17	11	12	7	14	20	180	199	134	153	165	183	3	1	1	6	12	18	11	31	22	31	39	34	6	10	3	36	39	34	65	53	50	89	70
Otu00085	78	90	56	78	79	63	86	83	83	69	77	81	52	60	29	23	30	36	39	43	142	153	122	143	160	127	14	17	12	33	36	33	67	48	5	3	102	101	19	20	22	0	2	0	0	0	1	2	0
Otu00086	13	23	69	76	32	44	77	82	76	85	108	103	83	71	133	133	132	112	84	109	21	23	47	29	23	25	7	13	13	16	12	8	6	13	6	13	27	10	8	16	12	14	20	19	12	26	24	21	30
Otu00087	15	10	28	23	15	20	17	18	24	22	17	19	33	36	38	49	35	38	35	55	46	57	50	66	55	56	9	7	5	5	1	1	8	4	13	21	24	20	73	81	60	63	71	64	69	70	74	62	75
Otu00088	103	117	105	110	100	105	108	107	106	101	81	98	103	108	98	87	89	102	90	93	25	19	21	28	28	14	11	9	8	7	7	2	5	3	8	7	12	9	11	18	21	9	16	16	17	16	20	18	9
Otu00089	63	61	49	58	41	45	52	43	48	64	54	61	42	41	28	43	43	47	31	20	22	15	14	14	9	17	63	54	50	32	53	41	26	30	29	28	28	22	21	19	17	13	11	14	12	13	20	9	23
Otu00090	12	7	8	7	9	7	5	7	9	10	9	7	8	9	8	9	7	9	7	10	62	54	51	59	58	74	2	5	2	2	8	4	31	26	22	43	47	50	9	10	14	22	16	20	38	28	34	50	45
Otu00091	41	44	52	46	45	44	37	40	46	30	39	38	41	24	20	21	16	25	20	20	33	35	16	25	32	28	7	9	8	24	21	23	29	29	19	40	30	36	46	37	43	35	35	32	41	24	29	27	24
Otu00092	42	55	67	59	68	62	42	35	41	45	30	34	54	53	72	92	63	72	90	72	10	16	20	14	25	30	9	5	8	2	6	16	20	14	11	13	9	23	43	27	41	57	34	44	40	44	44	34	24
Otu00093	61	60	68	75	87	74	54	55	60	61	54	70	61	59	80	63	70	100	96	84	27	23	30	33	25	26	8	8	11	10	7	7	7	12	12	11	18	30	12	8	11	17	17	20	13	28	21	20	11
Otu00094	58	76	76	69	68	87	77	73	64	70	68	66	77	78	85	79	84	78	82	82	17	23	16	24	39	23	9	6	7	7	4	5	13	9	11	8	17	15	11	16	10	15	12	12	15	6	16	20	17
Otu00095	19	15	22	17	21	20	23	30	36	18	24	21	39	31	34	38	40	26	39	59	51	46	38	56	52	47	11	6	7	6	6	12	20	16	18	35	32	26	19	26	19	30	31	24	21	28	32	36	34
Otu00096	1	2	1	2	0	5	3	0	2	3	4	1	5	2	2	2	1	4	3	3	101	96	127	108	102	99	1	2	0	7	3	0	12	14	13	35	32	28	2	5	4	17	19	18	49	49	30	68	71
Otu00097	22	24	21	29	29	37	15	27	23	25	19	19	23	21	14	15	14	12	14	12	11	7	10	15	18	13	47	67	43	5	13	6	7	14	6	6	6	6	48	44	49	29	32	35	27	23	23	11	13
Otu00098	40	34	43	31	56	38	37	33	32	36	42	44	41	47	29	21	21	21	32	24	5	4	5	8	7	7	3	4	0	1	1	0	2	0	0	1	2	0	135	123	163	134	106	124	54	77	62	47	36
Otu00099	11	2	12	9	3	4	105	104	82	126	103	86	62	74	56	88	72	79	42	37	14	14	41	31	15	20	24	18	11	6	11	10	18	9	6	12	11	9	13	26	25	5	19	24	7	20	21	10	16
Otu00100	2	0	1	0	2	1	2	0	2	1	2	3	2	0	0	0	0	1	2	0	0	0	1	0	1	0	0	3	0	2	2	3	5	4	2	2	2	1	131	118	125	119	169	143	112	113	173	37	57
Otu00101	59	68	71	63	62	78	64	55	56	53	67	51	64	73	42	37	44	51	42	64	15	16	14	13	22	19	6	13	12	12	12	9	13	11	12	7	15	15	15	12	10	21	17	14	12	16	15	17	23
Otu00102	16	14	14	13	13	4	9	19	14	9	20	10	14	10	6	0	5	5	3	12	79	59	38	47	48	51	2	0	0	13	1	5	27	26	24	45	47	37	2	1	1	16	27	21	55	30	35	71	48
Otu00103	1	8	5	2	4	2	5	8	3	5	5	5	6	4	4	5	8	6	0	8	21	29	34	35	37	25	0	1	0	0	0	0	4	7	3	14	13	15	4	5	5	10	9	9	15	19	7	22	23
Otu00104	7	10	7	7	6	7	6	7	6	2	5	10	8	5	6	6	5	6	3	3	53	37	55	46	29	38	1	0	1	7	8	3	9	18	8	31	24	28	7	8	6	25	27	32	50	50	59	52	59
Otu00105	0	0	0	0	0	0	0	0	0	0	0	0	0	0	0	0	0	0	0	0	323	319	260	233	153	158	1	0	0	0	0	0	0	0	0	0	0	0	0	0	0	0	1	1	0	0	0	2	0
Otu00106	60	63	59	56	47	48	57	53	64	36	48	49	53	51	77	88	66	61	73	62	18	25	16	19	18	14	5	12	7	10	3	5	7	7	7	12	8	17	8	13	10	13	12	16	7	11	13	25	14
Otu00107	4	4	7	5	3	2	5	3	1	1	6	8	6	9	3	5	0	0	0	2	13	18	25	14	22	22	0	0	0	0	0	0	2	7	4	9	11	12	2	3	2	4	11	14	14	11	23	26	40
Otu00108	37	36	35	41	30	29	26	32	31	23	26	28	30	39	33	42	29	21	32	28	44	43	43	36	28	47	1	6	5	9	8	5	15	11	7	16	15	27	9	4	6	12	12	16	26	16	20	33	25
Otu00109	16	15	23	13	17	19	14	26	26	26	20	17	18	14	18	19	21	14	20	21	66	66	51	49	41	55	9	5	4	3	4	1	10	18	15	27	30	23	13	15	13	14	14	14	26	34	23	39	42
Otu00110	1	0	1	0	0	1	1	0	1	0	1	1	3	1	52	60	59	47	61	56	15	26	29	17	20	21	3	1	1	3	3	2	3	1	1	6	4	5	11	19	29	16	17	35	18	22	26	12	19
Otu00111	36	38	39	37	33	41	32	41	37	43	45	36	44	41	61	51	53	53	49	58	23	19	15	14	19	9	7	14	13	11	9	10	5	14	7	14	12	8	13	13	13	9	16	9	9	15	16	17	12
Otu00112	13	17	21	20	15	28	12	15	13	16	16	14	21	21	21	18	17	26	21	21	12	12	10	4	8	7	24	28	22	14	28	13	14	14	21	20	13	11	55	63	59	46	38	54	25	32	36	14	28
Otu00113	2	0	1	1	1	1	2	5	3	3	0	4	0	3	6	7	3	4	0	7	107	116	118	84	90	83	0	0	2	0	2	1	4	4	1	15	19	15	2	0	3	14	15	10	17	30	24	48	64
Otu00114	41	45	42	42	45	43	35	35	35	33	30	39	37	44	39	40	42	31	33	35	10	17	15	5	16	13	8	7	10	6	5	8	6	8	6	14	10	9	38	18	32	21	16	12	18	12	8	10	11
Otu00115	2	5	4	5	4	4	5	6	4	1	6	3	8	5	15	16	25	16	17	21	23	18	32	25	48	51	2	1	0	3	4	5	6	4	4	29	15	28	7	7	7	29	16	27	56	42	40	60	70
Otu00116	1	0	2	1	0	0	2	1	0	0	1	1	0	0	18	27	29	19	19	20	34	34	36	26	48	24	18	19	23	2	7	3	3	2	4	6	12	12	22	20	32	14	32	25	31	36	34	30	23
Otu00117	53	43	32	32	37	37	42	44	33	39	44	31	34	41	47	55	44	57	43	57	13	19	22	13	20	14	5	13	8	8	8	9	16	9	9	15	8	11	11	2	6	9	10	14	18	12	8	13	16
Otu00118	8	13	11	14	15	22	20	9	13	12	15	19	35	29	17	32	28	37	28	39	13	6	13	11	20	18	5	7	10	2	3	7	5	9	7	7	14	8	29	36	39	34	31	36	26	22	29	12	15
Otu00119	44	40	35	35	31	42	27	34	40	39	34	33	36	23	26	31	24	21	24	21	8	11	12	11	10	9	13	8	20	15	14	21	14	10	6	17	16	15	15	18	21	13	17	16	8	9	10	6	12
Otu00120	95	48	66	59	87	44	61	55	57	63	55	51	71	65	43	42	42	33	39	37	6	10	9	7	5	11	4	6	4	2	4	3	2	4	2	4	6	5	6	5	2	2	6	8	4	5	5	4	8
Otu00121	35	34	36	25	24	31	24	27	24	28	24	33	20	22	22	22	24	17	20	19	10	5	10	18	23	8	19	16	9	19	9	9	16	13	14	11	12	14	13	15	10	11	11	5	17	17	9	13	7
Otu00122	12	24	19	17	13	20	20	13	24	12	18	18	16	24	9	6	12	10	14	10	21	25	28	24	32	34	7	6	5	11	13	11	9	14	10	15	12	17	13	9	13	19	11	16	18	11	15	19	24
Otu00123	17	17	19	18	15	20	22	22	12	18	21	19	15	11	20	9	14	17	13	12	11	14	8	8	7	10	8	9	9	24	17	24	19	20	17	22	16	19	24	13	20	15	12	13	13	16	10	19	10
Otu00124	10	11	14	7	13	16	10	12	9	8	5	8	11	6	16	11	12	7	14	16	13	10	13	6	15	14	14	21	29	15	12	25	14	20	16	15	17	24	3	5	2	11	6	1	3	2	3	10	3
Otu00125	1	3	3	2	3	4	5	0	3	2	0	1	2	1	5	0	4	0	2	4	55	62	74	76	75	68	0	1	0	5	1	2	2	5	7	12	14	9	7	0	2	13	13	11	26	22	24	47	35
Otu00126	8	7	12	9	19	9	8	14	11	6	5	13	14	9	10	12	10	12	9	16	31	20	21	16	16	17	1	3	2	1	2	8	4	12	7	8	13	11	0	9	3	25	23	20	27	27	23	39	37
Otu00127	3	6	13	13	22	13	29	26	26	29	31	30	33	24	52	51	39	41	36	68	20	21	29	15	11	32	5	6	2	5	5	0	5	8	2	7	11	5	4	5	13	4	17	10	4	25	10	14	21
Otu00128	4	1	2	7	5	7	5	4	4	6	4	4	8	6	7	6	4	4	10	7	10	6	4	9	9	6	3	6	3	5	6	7	6	4	13	10	5	10	7	4	8	6	7	14	6	11	11	4	8
Otu00129	45	46	53	49	54	67	39	46	34	44	45	46	42	31	35	29	39	32	45	38	10	6	10	6	12	10	3	1	3	2	1	5	4	2	2	4	6	5	4	1	0	1	1	6	3	5	5	6	6
Otu00130	51	51	50	54	51	59	49	41	43	51	42	45	51	40	24	20	17	29	16	22	8	5	5	6	4	14	3	5	2	0	5	2	6	5	2	1	5	4	3	2	1	2	5	3	5	4	6	6	9
Otu00131	6	8	4	4	4	9	6	8	4	3	8	3	4	4	9	11	7	10	10	7	8	3	2	7	6	3	11	5	4	16	18	13	18	23	15	12	11	12	41	47	47	29	29	28	27	21	28	11	14
Otu00132	22	31	30	29	42	43	26	23	17	29	40	23	27	30	38	37	25	42	44	44	8	16	17	13	9	12	5	6	3	5	4	1	3	5	2	8	7	7	0	5	4	7	5	10	6	8	5	10	7
Otu00133	0	0	0	0	0	0	0	0	0	0	0	0	0	0	0	0	0	0	0	0	91	54	107	114	143	149	0	0	0	0	0	0	0	0	1	4	2	3	0	0	0	4	2	9	14	20	15	17	31
Otu00134	1	0	1	0	1	2	1	2	1	1	1	2	0	1	2	0	2	1	1	1	19	12	1	2	1	1	1	1	0	1	1	1	12	11	10	40	47	39	4	4	9	15	23	16	29	36	26	25	31
Otu00135	12	7	12	3	5	11	6	6	7	8	7	7	6	11	7	6	1	2	5	6	3	0	1	2	1	2	2	1	0	0	1	0	1	0	2	1	2	2	78	90	113	63	53	54	25	39	40	8	8
Otu00136	39	37	46	38	37	34	27	30	26	29	34	31	37	33	31	29	39	32	37	34	15	8	12	10	9	16	10	5	5	6	3	3	7	3	1	3	8	6	2	3	5	3	5	7	3	1	8	1	3
Otu00137	31	30	29	31	23	24	27	33	29	22	33	25	19	23	21	29	26	22	30	31	5	9	8	6	5	3	4	9	17	8	9	6	8	11	16	17	13	14	3	3	7	6	3	2	8	7	6	7	3
Otu00138	21	32	26	34	18	21	26	20	27	27	29	32	26	21	24	27	19	31	34	17	6	8	8	11	15	13	4	2	2	7	1	3	7	4	3	6	4	7	8	8	7	4	3	6	8	8	11	19	11
Otu00139	4	6	8	7	8	7	7	14	6	13	6	6	6	10	5	4	3	3	3	6	6	6	6	7	7	4	3	4	2	3	3	5	6	9	6	11	15	9	17	8	22	13	13	20	14	12	25	9	10
Otu00140	6	4	17	6	8	12	46	48	30	44	28	22	14	6	38	45	26	48	32	38	6	5	20	14	5	7	6	4	2	7	4	4	4	7	6	0	3	2	7	8	4	1	4	2	3	11	9	7	14
Otu00141	9	6	19	14	8	16	30	34	36	30	33	39	26	24	17	22	24	25	18	8	5	5	8	10	8	5	13	4	7	2	5	1	5	3	2	3	6	2	10	15	13	6	12	15	3	22	7	7	11
Otu00142	22	15	22	14	14	13	5	18	15	12	14	6	19	16	20	19	20	8	19	7	3	11	10	4	6	10	1	0	2	4	4	10	3	9	11	7	13	11	8	13	10	8	11	12	10	6	18	6	5
Otu00143	5	7	10	4	6	6	7	10	6	12	9	6	9	5	12	10	2	13	10	14	1	0	2	23	34	1	16	10	19	8	4	3	5	7	5	20	11	16	6	6	4	4	7	10	13	17	21	35	0
Otu00144	6	1	3	3	1	4	2	1	2	3	3	1	6	3	1	4	5	3	6	4	6	3	3	4	8	1	11	9	8	14	19	19	10	18	11	10	9	5	8	3	6	5	9	8	3	5	4	6	6
Otu00145	24	7	20	15	19	18	14	25	15	18	15	19	19	28	13	20	24	21	18	18	1	4	3	7	2	3	4	6	3	2	5	2	7	5	4	8	7	3	2	9	5	1	3	5	4	4	6	4	4
Otu00146	16	20	12	16	15	10	14	17	15	14	10	15	13	22	7	17	19	12	28	7	5	8	12	10	2	6	1	4	3	4	2	7	4	9	8	3	4	8	27	26	21	20	13	14	23	12	20	11	8
Otu00147	5	3	1	6	2	3	4	9	10	6	3	4	7	4	5	7	5	3	4	5	5	6	9	3	6	7	11	17	5	15	17	10	11	9	12	11	11	4	11	4	6	5	2	2	3	5	5	4	4
Otu00148	43	39	36	28	33	32	33	37	33	22	27	32	24	25	19	28	20	20	15	19	9	9	8	9	7	6	1	1	7	1	2	0	3	5	2	8	4	5	5	5	3	7	2	5	3	3	5	5	6
Otu00149	4	2	3	6	7	3	7	4	9	3	4	1	2	3	2	3	4	2	4	3	3	4	3	7	9	6	4	4	4	2	1	4	3	4	3	8	5	6	1	0	0	0	3	2	1	0	4	2	1
Otu00150	13	7	7	11	10	8	9	7	5	17	10	6	13	9	14	17	29	31	23	16	17	4	15	14	12	11	10	15	21	2	1	8	8	9	9	7	4	10	2	3	7	6	4	15	9	4	9	8	8
Otu00151	2	0	0	1	2	1	6	2	3	11	1	1	4	1	5	11	5	4	2	4	9	5	2	11	3	2	6	1	5	40	27	7	24	9	4	23	4	4	1	8	17	2	5	1	2	3	4	2	4
Otu00152	3	6	8	4	5	4	9	9	8	7	8	3	5	11	9	5	2	12	6	13	3	0	2	3	3	0	0	0	1	0	3	1	1	1	2	1	4	2	66	60	66	39	43	27	22	11	19	6	9
Otu00153	11	19	22	16	11	9	14	9	14	22	15	19	11	9	10	8	15	12	9	13	0	5	5	9	5	4	33	15	27	14	8	13	11	20	16	14	10	17	13	9	4	9	3	7	3	7	4	8	5
Otu00154	8	9	10	5	8	7	12	6	1	9	5	0	2	5	2	0	3	25	34	28	9	12	6	9	8	9	6	9	12	0	5	4	3	2	4	4	13	5	22	17	32	20	18	15	12	17	23	22	14
Otu00155	3	5	1	1	1	2	3	4	6	5	7	3	1	4	2	1	3	2	1	4	10	15	12	7	10	11	0	1	0	0	1	1	5	6	1	7	8	3	2	2	5	8	9	7	10	11	16	10	14
Otu00156	3	3	11	12	14	13	13	14	10	2	19	16	14	15	17	17	11	13	25	15	8	2	3	8	5	9	8	5	7	7	8	4	6	7	7	11	8	5	15	14	21	9	7	9	12	8	9	11	7
Otu00157	12	13	13	9	11	15	8	15	19	12	8	12	6	15	9	22	22	15	15	12	2	8	9	9	3	7	14	17	20	16	12	17	9	15	10	8	8	9	7	10	14	17	13	12	8	14	7	11	14
Otu00158	10	13	12	7	9	15	7	12	12	10	11	7	7	12	10	10	11	8	12	15	8	4	7	2	3	4	21	22	24	22	13	30	16	24	23	13	20	17	4	4	7	7	3	5	0	6	7	2	3
Otu00159	9	8	10	9	10	14	8	9	10	8	13	9	7	7	9	14	8	6	10	10	0	2	3	4	1	3	4	3	3	2	2	4	4	5	1	1	2	3	16	8	7	11	6	8	6	5	10	2	7
Otu00160	0	1	1	1	1	1	1	0	0	0	2	0	0	1	0	0	0	1	0	1	8	14	5	7	8	7	0	0	0	6	4	2	12	8	5	15	13	19	0	1	0	9	5	13	24	22	12	11	16
Otu00161	21	28	20	16	16	19	27	23	26	19	15	24	17	24	17	15	17	19	17	19	7	4	5	5	8	4	2	6	4	0	1	0	0	2	1	1	2	3	18	15	11	13	16	13	11	9	5	2	6
Otu00162	16	17	16	21	13	28	28	16	21	22	23	25	21	17	20	12	18	15	12	17	5	6	7	9	8	6	12	10	2	3	3	7	5	5	4	8	1	9	5	4	6	5	3	7	5	4	6	6	4
Otu00163	5	8	3	9	6	3	10	7	8	4	4	10	6	5	4	4	0	4	5	5	10	15	11	17	22	9	31	43	33	3	2	7	7	10	12	9	7	10	9	3	3	6	6	9	8	10	5	10	14
Otu00164	5	6	15	13	14	11	11	6	5	8	7	8	9	9	9	9	15	3	7	12	7	8	0	5	5	3	17	20	12	21	7	18	14	10	12	12	3	12	14	6	12	4	7	8	10	14	10	9	7
Otu00165	6	6	3	8	3	4	4	3	3	3	5	3	8	4	11	14	11	14	17	19	8	6	14	11	11	4	5	5	4	4	2	2	2	5	4	3	3	2	25	30	23	29	26	26	11	10	10	5	8
Otu00166	29	21	13	21	24	12	20	16	15	18	15	13	22	14	18	20	14	19	23	21	2	9	5	2	2	6	3	2	5	2	2	1	4	2	6	3	4	2	4	5	4	3	5	5	3	6	4	3	1
Otu00167	17	12	15	9	23	14	10	22	20	20	18	11	13	17	21	18	12	20	19	13	7	3	4	6	2	5	6	5	4	4	7	2	8	8	6	4	8	7	4	7	3	1	4	2	6	0	3	6	4
Otu00168	2	0	6	2	5	3	5	7	6	2	4	12	3	3	18	12	11	13	6	7	1	3	7	10	2	4	0	1	0	0	3	1	0	8	0	3	12	3	2	4	3	1	12	10	2	12	19	6	11
Otu00169	2	0	1	1	1	2	1	0	1	1	2	2	2	2	2	2	2	1	1	3	20	14	11	16	17	8	1	0	1	3	2	4	12	4	5	8	20	17	1	1	0	5	5	6	8	8	11	16	18
Otu00170	11	12	8	5	8	9	7	13	7	13	8	8	14	14	11	7	15	18	7	6	7	3	3	6	4	2	3	3	3	1	0	4	3	1	0	2	0	5	32	31	29	19	24	16	9	10	12	7	10
Otu00171	1	3	2	2	2	3	2	6	7	7	2	3	2	3	0	5	4	2	4	6	4	5	3	3	5	2	6	6	5	13	5	12	6	7	9	6	8	3	8	8	4	2	2	8	2	5	5	6	2
Otu00172	1	1	0	2	2	1	1	1	1	2	2	3	2	0	2	3	2	1	1	3	16	18	12	12	7	9	0	0	0	0	1	0	8	6	8	17	23	22	2	0	0	1	1	2	9	6	6	16	11
Otu00173	9	10	9	7	12	10	10	10	7	10	9	7	5	11	11	13	16	17	20	14	4	9	7	3	3	3	5	3	7	4	2	3	0	3	5	4	2	5	10	11	10	10	10	6	12	8	11	9	7
Otu00174	4	10	14	6	9	10	7	13	6	15	12	10	12	11	28	26	26	36	28	36	8	3	6	6	10	5	3	2	2	1	1	4	4	3	2	2	3	2	5	8	12	5	5	5	2	8	7	2	5
Otu00175	0	1	5	3	13	2	0	2	1	2	0	2	1	0	1	2	2	1	1	0	33	29	29	22	25	32	0	4	0	1	0	0	2	2	2	3	3	1	0	1	0	13	4	0	23	2	18	33	20
Otu00176	8	10	5	6	4	5	2	5	5	6	7	3	13	6	4	7	2	7	8	11	34	32	26	28	31	25	0	1	3	1	0	1	3	2	3	2	5	7	2	8	2	5	9	4	5	3	5	20	16
Otu00177	4	4	2	8	4	4	4	5	4	4	7	4	3	4	1	6	3	6	7	1	2	6	3	0	3	3	1	2	1	9	10	3	13	4	9	2	7	6	33	25	30	29	18	26	14	14	12	2	4
Otu00178	7	12	9	13	8	11	11	13	14	7	13	15	8	13	20	18	12	15	9	15	6	2	5	5	9	3	2	4	1	2	1	2	3	4	1	5	6	0	7	8	9	5	7	11	3	6	7	5	5
Otu00179	11	9	13	22	23	15	14	13	17	18	17	10	18	17	10	13	15	23	20	18	2	8	5	1	5	4	2	1	5	2	1	0	2	2	7	3	3	1	3	2	6	7	5	3	6	2	2	6	7
Otu00180	8	2	12	11	10	8	29	18	19	19	28	33	17	22	12	13	11	9	10	12	9	6	8	9	8	2	1	1	0	1	1	1	0	4	1	2	8	4	2	6	6	0	1	7	0	7	4	4	9
Otu00181	12	4	20	20	8	7	36	39	35	39	40	45	25	20	15	8	13	13	14	7	2	1	5	3	4	2	2	1	0	1	0	0	1	0	0	0	5	2	1	1	2	0	3	1	0	2	3	2	3
Otu00182	19	12	15	9	13	12	9	8	9	13	14	25	12	20	19	16	23	10	10	13	2	5	5	3	3	9	3	7	3	5	3	6	7	5	4	10	8	6	2	2	5	1	1	4	6	2	2	2	2
Otu00183	7	3	7	8	7	10	9	4	6	9	8	12	7	6	5	10	10	7	11	12	8	4	8	1	4	8	10	5	9	0	3	3	0	5	6	3	4	5	12	11	14	7	9	7	4	5	11	10	3
Otu00184	6	7	5	0	5	4	4	4	4	7	7	9	4	2	13	16	20	14	12	16	7	6	6	3	6	9	5	8	9	3	4	13	1	2	12	4	7	1	9	11	12	9	7	8	9	5	5	6	8
Otu00185	7	12	8	10	15	9	17	10	10	17	10	19	11	8	5	4	5	11	3	7	3	5	4	5	4	5	1	1	0	4	4	5	2	6	3	6	6	4	4	2	0	3	4	3	2	5	4	7	4
Otu00186	0	3	3	1	1	2	3	3	3	2	3	4	1	2	0	2	3	4	4	3	11	8	8	14	8	4	1	1	0	2	2	3	5	7	1	10	9	8	3	6	2	9	11	6	7	5	7	7	8
Otu00187	13	16	10	11	20	16	12	12	17	12	8	15	12	17	0	7	2	6	2	6	4	9	6	1	2	6	7	9	9	4	7	3	5	6	1	2	3	4	1	2	1	2	3	0	2	3	0	3	1
Otu00188	1	4	2	2	3	2	2	0	7	2	0	1	3	0	4	2	4	0	2	1	24	18	23	21	30	18	0	1	0	3	3	1	4	4	2	2	3	2	2	1	1	3	6	4	12	7	10	9	9
Otu00189	7	9	12	9	12	17	9	10	10	15	9	20	10	8	12	8	9	10	12	18	7	2	9	5	4	7	1	2	5	1	2	4	4	3	2	2	5	9	2	4	6	11	2	5	9	2	4	3	3
Otu00190	17	18	13	12	13	13	5	9	8	8	11	14	6	7	17	12	9	9	5	8	9	9	4	5	6	5	0	5	2	1	4	2	3	3	3	2	2	3	5	3	8	4	1	7	6	7	6	1	3
Otu00191	2	3	2	4	3	1	6	4	3	1	7	6	0	2	3	2	2	4	1	2	2	1	3	3	2	2	4	3	7	7	14	7	8	2	10	6	5	1	1	6	3	5	4	5	6	5	7	3	2
Otu00192	7	7	14	6	7	7	8	5	8	5	6	3	5	5	5	9	7	11	3	5	3	6	3	2	2	2	2	0	5	2	1	3	6	7	3	4	7	11	2	3	2	2	9	2	2	6	11	2	3
Otu00193	2	7	7	9	7	6	23	19	10	14	17	25	20	13	10	14	20	13	6	9	5	0	6	4	2	0	9	7	5	2	6	1	1	3	1	2	5	0	8	11	9	3	4	4	1	8	7	2	6
Otu00194	23	27	12	12	11	16	14	15	15	18	10	17	3	15	17	14	9	9	12	13	5	2	4	10	7	4	5	4	1	0	1	0	2	2	0	3	2	3	3	0	2	5	4	3	4	3	4	4	6
Otu00195	0	3	0	2	2	1	2	3	2	3	1	1	1	2	4	0	3	2	1	1	8	6	9	7	5	7	2	0	3	1	6	1	4	4	5	4	7	8	1	4	1	3	3	2	1	8	4	6	4
Otu00196	9	6	7	12	8	12	4	12	10	6	9	13	7	8	15	10	13	10	12	16	1	7	0	3	7	2	3	3	3	1	2	2	4	3	2	0	0	4	10	9	8	9	10	4	4	2	5	6	5
Otu00197	1	10	2	4	2	3	2	7	6	1	2	5	2	0	1	3	1	1	6	3	6	1	2	1	2	2	2	5	5	4	9	8	6	8	4	5	5	7	3	3	7	1	8	3	3	0	1	4	2
Otu00198	2	4	3	2	0	2	0	1	0	0	0	1	1	1	5	10	12	11	7	9	5	6	0	4	5	5	1	3	3	0	2	3	0	2	3	4	2	9	19	18	22	11	9	11	6	9	8	10	3
Otu00199	13	16	8	15	12	9	14	11	12	11	14	9	12	10	12	15	18	12	10	6	1	1	7	5	2	5	3	1	4	0	0	2	2	1	5	2	3	1	2	5	3	0	2	4	6	3	1	4	0
Otu00200	0	0	1	0	0	0	2	1	2	0	1	0	0	1	0	1	1	0	0	1	22	26	21	24	24	25	0	0	0	0	1	0	2	3	0	6	10	5	1	0	3	3	1	4	6	7	4	15	8
Otu00201	0	0	0	0	0	0	0	0	0	0	0	1	2	0	0	1	0	1	0	1	14	10	9	13	12	13	1	0	0	1	2	2	6	5	2	4	1	2	2	0	0	2	0	2	3	7	4	10	6
Otu00202	2	1	0	0	0	1	0	0	0	0	1	0	0	0	0	1	1	4	0	0	2	1	1	0	1	0	6	3	4	0	0	2	3	2	1	5	5	3	16	14	23	15	18	25	17	8	21	3	7
Otu00203	16	11	11	10	13	6	18	9	11	12	12	12	13	9	17	13	21	15	18	9	4	2	3	3	6	2	2	2	1	1	1	1	1	1	1	3	3	2	3	3	0	2	1	3	4	1	6	3	4
Otu00204	17	12	4	10	8	11	7	8	5	8	6	12	17	13	8	15	5	4	13	10	3	5	3	7	10	3	2	2	2	2	3	3	5	5	1	5	1	5	0	0	2	3	3	3	5	5	1	4	3
Otu00205	12	9	16	13	7	10	8	13	9	10	6	20	10	8	7	12	14	16	20	8	8	7	8	8	3	3	0	2	1	0	0	1	0	2	0	2	4	1	1	0	3	3	1	2	0	2	1	2	2
Otu00206	8	4	7	5	8	6	10	6	1	4	6	3	3	6	4	4	7	5	13	5	1	5	2	0	1	8	20	18	14	7	5	6	4	5	3	6	4	10	4	3	4	2	3	0	3	2	1	1	3
Otu00207	0	1	1	0	1	1	1	2	1	1	2	1	1	0	17	19	14	8	13	15	2	9	6	7	8	8	12	11	8	3	3	4	5	7	7	4	9	2	3	3	2	2	9	5	2	2	1	9	4
Otu00208	0	1	0	0	0	2	2	2	0	2	1	2	1	2	1	2	2	2	3	1	7	5	6	7	11	8	1	0	3	5	3	7	3	4	5	5	9	5	4	3	2	5	5	7	4	4	1	6	8
Otu00209	6	10	7	5	4	9	10	5	8	6	5	6	7	3	9	9	3	17	9	8	5	5	0	4	2	2	6	2	6	1	4	5	2	2	5	4	1	3	4	6	5	3	5	2	4	6	2	2	2
Otu00210	9	11	12	8	20	13	16	10	8	17	8	13	10	18	10	15	15	12	18	15	6	5	1	4	3	2	1	2	2	0	0	1	3	2	0	2	1	3	1	1	3	3	2	3	2	0	0	1	2
Otu00211	4	7	7	1	3	5	2	3	2	2	2	4	7	8	1	2	5	3	2	2	7	0	4	1	5	2	10	9	15	4	3	6	3	4	4	2	6	5	10	6	5	2	3	6	2	3	6	3	2
Otu00212	4	5	1	3	2	2	4	0	1	4	3	3	3	3	0	0	2	3	1	0	0	4	0	0	1	1	6	9	7	6	4	3	3	2	4	3	3	3	22	18	23	9	10	12	11	6	5	1	2
Otu00213	1	2	3	2	1	2	2	4	4	4	1	0	2	2	7	7	12	8	4	4	8	8	8	7	5	4	6	6	5	4	1	2	3	3	1	6	11	3	2	4	7	4	3	2	3	3	8	5	9
Otu00214	10	11	13	14	8	10	8	12	3	12	9	9	7	14	9	8	10	14	11	4	7	2	6	7	4	2	1	6	1	1	0	3	1	3	4	1	2	0	0	2	2	3	4	0	0	5	5	3	3
Otu00215	5	4	4	7	5	15	8	5	2	3	8	6	6	5	3	7	3	4	3	4	3	4	0	2	1	5	8	6	11	6	1	3	2	1	6	4	2	4	2	2	6	2	6	2	6	2	6	3	1
Otu00216	6	2	4	7	3	1	6	5	4	3	8	5	5	4	8	5	2	5	5	2	1	2	1	1	0	0	1	1	1	1	7	1	0	4	1	0	3	3	2	0	2	1	6	0	0	5	1	2	1
Otu00217	0	1	0	0	0	0	0	1	0	0	0	1	2	2	1	0	2	1	1	4	1	3	1	1	0	0	0	0	0	0	3	1	1	2	4	13	12	17	0	0	0	5	7	2	13	14	17	3	8
Otu00218	11	10	7	11	2	12	11	6	4	9	8	12	6	6	14	10	12	11	10	10	4	5	4	3	6	5	3	1	2	1	1	1	1	1	3	2	1	1	3	3	0	6	1	0	4	4	4	2	4
Otu00219	8	4	7	10	11	12	5	6	8	9	8	8	9	7	19	14	11	9	13	15	3	2	8	4	5	1	1	0	1	1	2	4	1	3	1	1	1	2	2	5	1	1	3	1	0	3	5	0	3
Otu00220	6	5	7	4	7	4	4	1	7	10	10	11	4	6	14	18	9	12	10	15	2	1	6	2	1	5	2	1	1	1	0	1	3	1	2	3	2	3	4	4	6	6	0	1	6	3	2	4	3
Otu00221	6	10	7	2	4	8	8	3	5	3	6	5	11	6	9	10	5	14	4	9	3	3	2	5	1	6	0	4	1	8	6	1	5	8	7	3	9	5	1	3	3	1	1	3	0	2	0	1	3
Otu00222	1	2	4	5	1	2	0	4	2	3	0	5	2	3	2	4	0	0	2	1	0	0	0	0	0	3	14	14	12	12	10	11	9	7	0	4	3	7	6	1	3	5	3	6	0	6	3	1	0
Otu00223	5	6	12	5	5	4	10	10	9	10	12	4	8	6	4	5	6	4	7	4	6	5	2	5	2	4	0	3	2	4	4	5	0	2	3	2	3	6	5	5	5	4	3	3	3	3	6	1	1
Otu00224	12	11	15	11	14	12	11	15	7	5	19	8	11	11	8	8	8	6	7	8	4	3	1	4	7	6	2	1	1	0	2	0	1	1	0	1	1	1	0	1	1	1	1	0	5	0	3	4	3
Otu00225	5	3	3	6	8	6	1	5	3	4	1	4	8	8	4	4	2	6	4	2	1	4	2	1	3	2	13	7	11	1	6	1	8	7	8	4	2	2	1	6	4	3	4	4	7	7	5	6	9
Otu00226	7	5	4	6	4	3	6	6	4	2	5	0	3	5	5	4	7	5	7	6	3	3	4	0	5	5	1	0	0	2	2	0	2	2	3	1	0	1	7	5	2	9	1	0	4	4	5	4	6
Otu00227	3	3	8	11	4	4	11	9	15	13	13	16	9	8	18	11	13	13	5	11	2	1	5	4	5	7	0	0	0	3	1	0	1	0	1	0	4	2	1	3	0	0	1	1	0	2	5	2	2
Otu00228	9	16	17	8	14	12	14	14	13	9	19	17	18	19	3	5	8	5	6	9	0	1	0	4	0	1	3	2	1	2	3	2	0	0	0	2	3	0	0	2	2	2	2	0	0	0	1	0	0
Otu00229	2	1	3	2	1	1	1	2	2	3	0	1	1	0	1	3	2	1	0	5	2	1	3	3	4	0	3	5	2	6	1	5	2	3	1	2	2	1	1	2	1	1	3	0	2	1	1	1	1
Otu00230	1	1	5	2	1	1	1	2	4	2	2	2	0	3	0	3	4	1	1	1	5	4	1	3	2	3	1	2	0	1	1	1	4	1	0	2	3	6	3	1	1	2	3	3	1	1	4	3	1
Otu00231	2	2	1	0	1	2	0	0	1	0	0	0	0	1	0	4	2	2	1	2	1	0	2	2	0	3	2	0	2	0	0	0	0	1	0	0	2	2	8	10	6	3	6	10	5	3	8	4	6
Otu00232	4	2	3	1	1	1	3	2	2	3	1	2	4	3	5	4	5	0	3	4	0	0	3	0	2	2	6	5	12	2	4	4	2	5	6	2	2	1	7	1	2	3	2	2	1	1	2	4	1
Otu00233	5	3	9	2	2	1	3	2	2	4	1	4	2	4	9	10	14	11	10	9	5	5	6	2	3	6	1	0	0	1	1	1	3	2	1	3	4	3	0	0	6	3	3	1	3	1	4	4	6
Otu00234	9	6	8	8	10	8	5	6	11	8	7	8	14	6	6	4	4	8	6	13	2	3	5	8	2	2	0	0	2	1	3	4	2	0	0	0	2	2	3	0	3	1	3	1	1	1	5	0	1
Otu00235	4	2	6	5	6	10	4	2	2	1	2	4	1	5	8	11	5	3	6	3	5	6	5	3	4	4	2	0	2	0	0	0	2	3	3	2	2	4	1	1	1	0	1	1	5	6	8	1	6
Otu00236	11	11	10	8	8	10	9	4	5	6	7	7	6	8	4	2	10	14	11	12	3	2	2	3	3	3	0	0	3	0	0	4	1	0	4	1	4	1	2	1	0	5	2	2	2	3	3	1	2
Otu00237	1	1	2	0	1	0	1	1	1	2	1	0	1	2	3	0	1	0	2	1	2	12	13	12	15	6	0	0	0	0	0	1	0	4	2	1	8	5	0	0	0	2	3	1	5	6	6	4	3
Otu00238	2	1	1	6	5	4	6	7	9	9	10	13	6	7	11	5	5	9	8	9	1	1	3	3	3	8	1	1	1	0	3	0	2	3	0	2	3	2	0	0	1	1	2	2	2	3	2	2	4
Otu00239	12	13	14	11	9	18	13	8	10	9	12	10	5	5	7	5	5	3	4	2	0	1	1	1	1	1	1	1	0	0	1	0	1	1	0	0	0	1	2	7	3	2	3	0	1	1	0	2	2
Otu00240	1	1	1	0	1	0	1	1	2	1	1	3	2	2	2	0	2	3	1	0	14	15	14	14	9	14	1	4	0	1	0	0	4	1	0	2	5	1	0	0	1	2	1	4	4	3	5	11	5
Otu00241	5	1	4	3	6	6	5	2	6	4	4	3	6	5	7	4	1	3	2	1	1	2	0	2	0	0	6	4	10	6	5	8	3	2	2	4	2	4	3	1	3	0	0	2	1	2	1	3	1
Otu00242	2	0	1	1	0	2	1	1	2	3	0	1	0	0	12	10	10	12	7	7	3	3	2	3	5	1	2	0	1	1	0	2	1	2	1	2	5	3	0	2	1	1	2	2	3	0	5	0	1
Otu00243	2	3	0	0	2	1	2	0	1	4	2	1	1	2	2	4	4	2	1	2	16	10	9	10	2	12	0	0	1	2	0	5	0	1	2	3	0	2	2	3	2	0	2	1	1	3	6	4	7
Otu00244	1	1	0	2	2	2	1	0	2	4	3	2	2	1	0	2	1	1	1	4	4	1	5	0	1	4	2	5	1	2	2	4	5	6	1	4	0	1	0	0	1	3	1	2	4	2	2	1	1
Otu00245	0	0	0	0	0	0	0	0	0	1	0	0	0	0	1	0	0	2	0	0	1	3	2	2	0	2	0	0	0	3	3	4	7	4	5	6	6	1	0	1	0	7	3	4	8	6	5	4	1
Otu00246	12	9	11	10	10	8	7	7	8	8	10	2	6	12	10	6	2	4	4	11	3	4	4	5	6	3	1	0	0	0	0	1	0	1	1	2	1	3	0	3	1	0	2	0	0	0	2	0	2
Otu00247	7	6	5	4	7	9	8	3	8	7	6	4	10	14	7	5	9	6	5	6	1	6	1	5	2	2	1	1	1	1	0	1	0	0	1	2	1	4	3	1	2	0	4	2	3	3	1	2	3
Otu00248	0	1	1	3	0	2	3	1	2	3	2	0	2	2	4	4	2	1	2	3	5	5	9	2	6	12	1	1	0	1	1	1	2	3	3	3	5	5	0	0	0	3	2	4	1	5	7	3	7
Otu00249	0	0	1	3	0	1	1	2	1	1	1	1	3	2	4	2	2	5	4	3	3	3	1	1	3	2	0	0	2	2	1	3	1	1	1	2	3	2	4	9	7	4	10	6	3	3	3	5	2
Otu00250	0	3	3	1	0	4	2	2	3	6	2	3	0	2	3	6	0	0	2	0	5	11	8	11	9	11	1	0	0	0	0	0	0	2	1	3	4	2	3	1	8	3	1	4	3	6	9	6	11
Otu00251	2	1	0	2	0	1	2	1	2	3	2	0	6	2	2	2	6	1	1	1	3	2	3	0	0	0	7	4	2	1	3	5	1	2	0	1	4	3	5	3	6	13	4	15	8	2	15	5	10
Otu00252	2	3	6	10	7	7	5	2	4	3	5	8	5	7	8	7	6	6	6	3	3	0	1	4	2	2	2	1	1	2	0	2	1	0	1	0	2	1	4	4	6	5	4	0	2	0	3	2	4
Otu00253	1	3	5	4	4	6	2	5	5	3	3	6	5	5	6	2	5	5	10	4	1	3	1	2	3	3	1	1	2	1	0	1	2	1	2	1	4	2	2	1	0	4	0	4	1	3	3	2	5
Otu00254	0	2	3	0	1	2	3	1	1	0	2	2	0	0	0	1	0	0	0	0	0	0	0	0	0	0	1	1	2	0	4	0	0	0	0	1	0	0	12	23	17	9	17	8	3	3	4	1	9
Otu00255	5	2	0	2	2	3	3	2	1	4	1	2	2	2	3	6	3	3	4	6	2	0	2	1	2	2	1	2	0	3	1	1	1	1	2	3	2	4	13	7	5	7	6	4	8	11	4	8	2
Otu00256	10	3	11	4	4	6	5	9	4	6	4	10	8	9	12	5	4	7	7	7	2	4	1	3	1	2	0	0	1	0	1	0	2	1	3	1	2	2	3	2	0	1	2	0	3	2	2	2	2
Otu00257	0	0	0	0	1	2	1	0	0	1	1	0	0	0	0	0	0	1	1	1	9	7	8	10	12	14	5	1	2	2	1	5	3	2	2	2	3	2	4	1	2	2	2	4	1	1	4	5	3
Otu00258	3	3	2	2	0	2	1	1	2	0	3	1	0	2	0	2	1	1	4	0	0	1	0	0	0	0	0	1	0	9	21	11	2	4	4	2	4	1	0	0	0	0	2	1	3	1	1	0	0
Otu00259	2	1	0	1	0	0	1	1	0	0	2	0	2	0	0	0	2	0	0	0	0	1	2	1	1	3	0	0	0	0	0	0	0	1	0	4	6	2	0	1	1	1	1	1	8	2	3	0	2
Otu00260	5	3	2	2	4	3	2	0	4	4	1	7	5	6	3	1	5	1	2	1	2	0	0	2	0	0	6	5	4	6	1	11	11	8	6	4	5	4	3	4	2	0	1	1	4	2	0	0	0
Otu00261	0	0	0	0	0	0	24	28	23	34	26	29	34	24	0	0	0	0	0	0	0	0	0	0	0	0	0	0	0	0	0	0	0	0	0	0	0	0	0	0	0	0	0	0	0	0	0	0	0
Otu00262	4	4	5	2	4	3	6	2	3	6	4	0	5	8	5	8	4	6	5	6	2	1	1	3	3	4	2	2	3	0	2	0	3	1	1	0	0	1	3	3	1	3	3	4	1	1	3	4	1
Otu00263	0	1	1	0	2	1	0	0	0	0	0	1	0	1	0	6	2	2	5	2	10	17	6	14	11	11	0	0	0	0	0	0	0	0	0	1	1	0	0	2	1	3	1	1	5	5	5	3	4
Otu00264	0	0	0	0	0	0	0	0	0	0	1	0	0	0	3	2	4	2	8	5	9	7	6	0	6	8	2	0	0	2	3	0	2	3	2	5	3	7	5	3	0	5	2	3	1	9	3	6	7
Otu00265	0	1	3	4	8	0	8	0	0	5	0	4	0	5	3	7	0	6	0	7	16	17	2	12	0	19	1	0	0	0	0	2	1	0	0	0	0	0	0	0	1	0	0	3	2	0	0	0	0
Otu00266	4	5	6	9	8	6	9	6	8	6	5	11	7	10	9	10	8	11	4	6	3	2	1	8	2	3	2	0	0	0	0	0	0	1	0	2	0	1	1	0	0	0	1	1	1	0	4	0	0
Otu00267	1	1	2	0	0	3	0	7	2	0	1	2	5	2	2	10	7	4	1	2	6	7	4	4	4	4	2	3	5	0	0	2	1	1	1	2	4	0	4	3	4	6	2	6	5	1	2	4	2
Otu00268	3	3	2	4	2	0	4	5	0	2	0	1	3	0	2	3	1	2	4	2	1	0	1	1	2	0	5	3	6	3	2	2	1	2	2	3	5	2	4	1	2	4	3	3	0	1	3	5	3
Otu00269	12	12	5	13	12	10	11	10	9	10	13	14	6	7	3	3	2	0	2	1	3	3	1	1	1	1	7	3	6	1	3	1	0	2	1	0	2	1	1	2	1	0	2	1	2	0	0	4	1
Otu00270	1	1	0	6	2	3	0	1	1	2	1	3	2	2	1	5	2	5	2	5	4	2	0	2	3	7	1	4	5	2	0	3	2	3	0	2	0	1	3	2	3	2	2	4	3	4	3	4	1
Otu00271	1	0	4	3	1	2	1	1	3	1	3	2	2	2	4	8	9	10	5	8	1	2	5	3	3	4	1	2	0	0	2	0	1	0	0	2	2	0	1	0	3	1	1	6	2	4	1	0	5
Otu00272	6	4	1	1	1	2	1	0	3	3	2	3	3	1	3	2	1	2	1	1	0	0	0	2	0	0	0	0	0	1	0	1	0	0	1	1	0	0	10	14	13	20	15	10	10	9	6	2	2
Otu00273	4	0	2	0	3	0	2	2	1	0	0	1	2	0	1	2	1	2	3	3	2	3	2	1	5	4	0	2	3	0	1	2	2	2	3	2	1	7	1	4	4	2	3	4	1	1	2	3	4
Otu00274	2	1	2	5	1	5	2	2	0	0	0	0	2	0	0	1	2	1	2	3	3	2	5	0	2	6	8	16	8	2	7	2	5	1	3	2	5	2	0	2	3	3	0	6	1	1	3	1	3
Otu00275	4	0	0	1	1	0	3	0	1	1	0	2	3	1	1	2	1	0	1	2	1	0	0	2	4	0	0	1	1	0	1	1	1	0	1	0	1	0	0	0	2	0	0	0	1	1	0	0	1
Otu00276	3	2	3	3	3	1	1	5	7	3	1	3	4	3	4	4	6	3	2	1	1	0	1	0	1	3	2	1	0	1	1	1	1	0	2	2	6	2	1	1	0	1	4	1	0	1	0	3	1
Otu00277	2	3	2	3	3	4	2	3	5	3	2	3	3	3	5	2	3	1	2	4	2	0	1	0	3	1	1	2	1	1	2	3	1	5	0	3	1	0	2	5	2	3	2	1	1	5	2	2	2
Otu00278	3	1	2	3	1	2	5	5	5	0	3	1	6	1	4	2	2	4	7	1	0	2	3	2	1	1	1	0	2	0	0	1	4	2	1	2	0	2	0	1	0	3	1	0	1	1	2	1	1
Otu00279	0	0	0	0	0	2	0	0	1	0	1	0	0	1	0	1	0	0	0	0	7	4	0	8	0	3	0	0	0	0	0	0	9	0	0	0	2	5	0	0	0	1	0	0	0	3	6	3	8
Otu00280	0	0	0	5	0	0	1	0	5	0	3	7	2	2	5	2	7	4	0	1	1	1	4	0	0	1	0	1	0	0	1	0	0	0	0	0	0	0	5	21	10	5	6	11	4	6	8	2	8
Otu00281	1	0	1	1	1	3	1	1	1	2	3	1	1	2	0	1	5	1	4	2	4	2	2	2	2	4	0	0	2	1	0	0	0	1	0	2	1	0	4	6	2	5	5	1	4	4	1	4	4
Otu00282	5	7	8	5	11	9	4	3	4	8	8	1	3	7	3	4	7	7	8	7	5	1	1	3	0	1	3	0	0	0	2	0	1	0	0	0	0	3	2	1	2	2	3	1	1	1	1	0	0
Otu00283	6	4	5	2	5	6	4	2	2	4	5	4	2	0	10	8	3	9	9	7	6	4	2	4	1	2	1	2	0	0	1	0	1	5	0	0	2	1	0	1	1	1	4	3	0	3	0	2	3
Otu00284	1	1	0	2	1	2	2	4	5	0	3	3	7	3	3	0	0	3	3	2	2	2	0	1	0	2	3	6	0	1	9	6	2	1	3	0	10	1	2	2	3	3	1	0	2	3	6	1	1
Otu00285	0	1	0	1	3	1	0	1	1	0	0	0	3	0	2	1	1	6	9	9	8	2	1	3	4	3	12	15	8	0	0	0	3	0	1	1	3	0	4	0	1	5	0	0	2	0	5	1	0
Otu00286	2	1	3	2	1	1	0	1	3	0	0	2	2	1	1	1	2	1	1	2	2	0	1	1	0	1	8	8	3	0	0	2	2	2	1	0	2	1	2	1	6	2	3	0	4	2	3	1	2
Otu00287	4	1	2	1	0	2	2	3	0	3	4	4	2	3	3	6	7	3	4	4	0	1	0	0	2	1	0	0	1	0	0	0	0	1	1	2	0	0	10	8	14	9	3	5	1	3	4	4	2
Otu00288	11	9	3	5	9	7	5	9	6	6	9	6	6	7	4	2	1	2	5	3	1	0	3	1	1	0	2	8	1	0	0	3	2	2	0	0	1	0	0	0	1	0	1	0	2	0	0	1	1
Otu00289	2	8	10	4	6	7	4	4	6	5	5	3	7	2	2	4	1	2	12	4	3	0	2	1	0	2	0	1	1	1	0	0	1	0	0	1	0	1	1	1	2	1	2	0	1	1	0	0	1
Otu00290	3	3	2	4	2	4	1	4	4	3	2	3	3	5	1	0	3	3	3	3	1	0	1	0	2	2	0	2	0	0	2	1	1	1	0	0	2	1	1	1	2	2	1	0	2	0	0	0	1
Otu00291	10	7	3	5	5	8	6	4	5	2	5	5	4	5	6	11	6	9	3	5	1	1	1	0	0	0	3	2	3	4	4	2	1	1	2	3	1	1	0	0	0	1	0	2	2	0	1	3	1
Otu00292	5	4	0	6	3	1	1	2	3	2	1	4	1	3	3	5	2	1	1	0	0	0	0	0	1	0	0	2	1	1	1	1	0	1	2	0	1	1	1	0	0	0	0	0	0	0	1	1	1
Otu00293	6	8	8	4	3	9	4	6	2	7	6	3	5	7	9	6	8	6	5	8	2	1	0	2	0	1	1	0	0	0	1	1	2	1	1	4	0	0	0	0	1	3	1	1	2	1	2	1	2
Otu00294	0	0	1	2	1	1	1	2	3	1	1	1	5	1	7	13	9	7	8	6	3	1	3	1	0	1	1	0	2	0	1	0	1	2	1	3	2	2	3	5	1	4	4	3	1	4	0	1	4
Otu00295	3	2	2	0	4	0	1	0	2	0	0	2	0	2	5	3	0	1	1	2	0	0	1	0	0	0	0	0	0	0	0	0	0	0	0	0	0	0	0	1	1	3	4	1	2	0	1	0	2
Otu00296	1	0	0	0	0	2	0	0	0	0	0	0	2	1	0	0	0	0	0	1	8	6	2	1	1	0	0	0	0	0	1	3	1	1	2	3	3	5	0	2	1	3	1	1	4	2	1	2	7
Otu00297	1	0	1	1	1	0	1	1	0	1	3	0	3	2	3	1	0	0	1	1	0	0	0	0	0	0	0	0	4	7	6	10	6	10	11	6	0	0	0	0	0	0	3	0	0	0	0	0	0
Otu00298	1	0	1	2	3	2	6	7	4	5	8	4	3	7	8	11	6	10	6	8	2	2	1	0	3	1	0	0	1	1	1	1	1	0	0	1	1	1	2	2	2	1	2	1	0	2	2	1	2
Otu00299	4	2	3	2	3	3	1	4	5	4	0	2	3	0	3	3	2	1	5	1	2	1	1	2	4	1	7	4	5	3	1	6	1	2	6	0	1	0	6	6	0	2	0	4	1	3	4	0	2
Otu00300	0	0	2	1	1	0	0	1	0	0	0	2	0	2	0	1	0	1	2	1	0	2	0	2	0	0	2	0	1	3	3	3	1	1	1	2	3	2	1	1	2	0	1	1	1	1	1	1	0
Otu00301	2	4	4	6	5	8	4	4	3	4	3	4	2	3	4	4	3	6	6	5	4	3	1	3	4	2	0	0	0	0	1	3	0	0	1	0	3	0	0	0	2	1	1	3	0	4	2	0	2
Otu00302	0	2	2	2	2	5	2	2	5	2	2	5	5	2	7	7	7	8	5	6	2	2	0	2	2	2	0	0	1	2	1	1	1	4	2	2	2	1	2	1	3	0	0	2	0	2	2	2	1
Otu00303	1	2	1	0	2	1	3	0	3	3	0	0	1	1	0	0	1	0	0	0	0	1	1	0	0	0	8	9	1	0	1	0	0	0	7	2	2	5	10	10	7	4	1	0	2	0	2	0	0
Otu00304	1	0	3	2	4	1	2	0	1	1	3	1	0	1	5	3	1	4	3	4	4	1	3	3	4	3	0	3	2	3	1	0	2	1	2	1	2	3	0	2	4	2	1	4	0	1	6	5	0
Otu00305	1	1	2	0	6	2	1	7	9	6	3	3	0	3	2	1	4	1	3	11	1	3	2	3	2	3	3	4	1	0	0	4	3	0	0	0	1	0	3	4	1	6	1	5	0	4	3	3	0
Otu00306	0	1	3	3	1	6	2	4	3	1	1	4	2	5	1	4	1	0	4	2	1	0	2	2	3	1	5	5	2	3	4	6	6	3	3	4	2	4	0	0	1	1	1	0	1	0	0	0	2
Otu00307	0	0	0	1	1	0	1	0	1	0	0	1	0	0	0	0	0	1	0	2	0	0	0	0	0	0	0	0	0	0	0	0	0	0	0	0	0	0	3	17	8	7	9	10	7	4	8	6	7
Otu00308	0	0	1	0	0	0	0	0	0	0	0	0	0	0	9	3	3	1	4	8	2	0	3	1	1	3	1	2	0	4	5	3	4	3	0	2	0	0	2	0	0	1	0	3	1	3	7	0	0
Otu00309	0	0	0	0	0	0	1	0	1	0	0	1	0	2	4	1	1	0	1	1	0	0	0	2	0	6	0	1	1	1	1	0	0	0	0	1	0	1	6	9	2	6	5	4	4	7	1	4	2
Otu00310	3	1	2	0	2	0	2	1	1	4	3	3	0	3	2	3	3	6	2	4	1	1	1	0	2	0	1	0	0	0	0	1	0	0	0	1	1	1	3	0	1	0	0	1	0	0	1	1	0
Otu00311	0	2	0	0	1	2	0	0	0	0	0	0	0	1	0	0	0	0	0	0	0	0	1	0	0	0	0	0	0	0	0	0	0	0	0	0	0	0	0	1	0	1	0	0	1	0	0	0	0
Otu00312	2	1	0	1	1	1	1	0	6	2	0	1	2	3	4	1	3	4	1	2	2	2	1	0	1	0	1	1	0	4	1	3	0	3	2	3	6	3	1	0	0	3	0	1	5	3	1	3	3
Otu00313	1	0	1	1	0	0	0	2	0	0	3	0	1	2	2	1	2	2	2	2	3	5	3	1	3	4	0	0	0	0	1	1	1	4	1	1	1	1	0	0	1	3	2	4	3	7	5	8	3
Otu00314	4	3	3	3	0	1	0	3	5	3	3	1	4	5	1	2	3	5	1	8	1	0	0	3	0	2	0	2	1	0	2	0	0	1	1	2	2	3	4	6	4	3	5	2	2	3	2	3	5
Otu00315	1	1	1	2	0	0	0	4	1	1	0	2	1	0	2	0	1	2	0	1	0	0	0	1	0	0	5	0	4	1	0	0	0	0	0	1	0	1	12	12	7	4	4	7	5	1	6	0	3
Otu00316	3	0	1	0	1	2	0	0	0	0	0	0	1	0	1	0	0	0	0	2	0	0	3	0	2	2	24	22	18	5	8	1	3	8	4	5	3	2	1	0	0	1	0	0	0	0	1	0	0
Otu00317	7	6	3	2	3	3	1	4	4	7	3	2	2	4	4	4	1	0	3	1	3	3	0	0	1	2	1	2	4	2	1	2	3	3	4	3	2	5	2	1	2	0	3	3	1	0	0	4	0
Otu00318	2	2	1	4	1	1	4	2	3	2	1	2	0	1	1	3	6	4	0	1	3	3	3	2	2	1	1	0	2	1	1	1	2	1	1	0	0	1	1	1	3	4	3	3	2	5	3	3	1
Otu00319	1	0	0	0	0	0	2	0	1	1	1	1	1	0	2	0	0	0	1	0	3	8	3	3	4	9	0	0	0	0	1	0	0	3	1	3	4	1	0	5	1	1	0	1	4	4	2	6	3
Otu00320	6	2	3	4	1	5	4	3	3	1	2	2	1	9	3	1	3	5	2	6	1	0	2	0	2	4	1	0	3	2	0	1	1	3	1	2	2	1	2	2	3	2	0	5	0	1	0	1	2
Otu00321	0	6	8	4	2	6	4	2	2	4	3	5	2	4	7	1	3	4	3	5	0	2	0	0	1	2	1	1	2	2	0	1	0	1	0	0	1	2	1	3	1	1	0	3	3	0	1	0	1
Otu00322	1	2	3	2	1	4	1	1	1	1	1	2	2	0	1	2	1	1	2	0	0	0	4	0	1	0	4	4	6	1	1	1	2	3	2	1	4	1	1	2	6	0	0	0	4	1	0	0	1
Otu00323	0	0	0	0	0	0	0	0	0	0	0	0	0	0	1	1	0	0	0	0	0	1	0	0	0	0	0	0	0	0	0	0	0	0	0	0	0	0	0	1	3	0	3	1	1	3	3	2	1
Otu00324	2	0	1	1	0	2	1	0	0	0	0	1	0	0	1	3	0	1	4	1	1	5	5	4	2	4	0	0	1	0	1	0	1	1	0	2	0	1	1	0	3	4	3	3	2	3	2	4	1
Otu00325	2	1	2	0	1	0	2	5	1	3	4	1	3	2	2	1	1	3	1	1	3	0	0	1	0	0	1	0	1	2	0	0	1	0	0	1	0	2	3	2	1	1	3	1	0	1	0	0	4
Otu00326	6	6	4	8	6	7	5	6	5	7	8	6	6	5	1	6	3	1	0	1	3	0	1	1	1	0	0	1	2	1	1	0	0	0	0	0	1	0	0	1	0	0	0	1	1	1	0	1	1
Otu00327	0	1	0	1	1	0	1	0	0	0	0	1	0	1	0	0	1	1	0	0	1	1	2	1	1	1	5	0	1	0	0	0	0	0	0	1	0	0	1	4	2	0	2	5	1	2	5	2	2
Otu00328	0	0	0	0	0	0	0	0	0	0	1	1	0	1	0	0	0	0	0	0	0	0	0	0	0	0	0	0	0	0	0	0	0	0	0	0	0	0	0	0	0	0	0	0	0	1	0	0	0
Otu00329	7	1	3	1	7	3	2	2	6	2	2	1	3	6	0	1	2	0	0	2	1	1	0	1	1	0	3	2	0	6	3	4	2	3	2	3	1	0	2	0	0	1	2	1	5	1	0	2	1
Otu00330	3	1	2	3	4	1	3	3	3	3	5	9	4	4	4	2	6	5	7	3	2	2	3	3	2	1	1	0	0	0	1	0	0	0	0	1	0	0	1	0	0	0	2	0	0	1	0	1	0
Otu00331	2	2	3	2	0	3	1	3	1	2	0	0	4	6	1	1	0	3	1	3	0	2	4	0	1	1	0	0	1	1	0	0	0	0	0	0	0	1	0	0	1	0	1	2	2	0	1	1	2
Otu00332	2	2	3	2	1	1	2	2	3	4	2	2	1	2	3	2	0	2	3	2	2	1	0	2	0	1	3	2	7	2	2	1	0	4	3	1	1	4	1	0	0	0	0	0	0	0	0	0	0
Otu00333	6	0	4	0	5	3	5	5	4	2	4	4	1	2	4	3	1	6	2	1	1	1	1	0	1	2	0	0	0	3	0	1	0	0	0	0	1	2	0	0	2	0	1	0	0	1	1	3	1
Otu00334	0	0	3	0	0	2	1	0	0	0	0	1	0	0	3	4	2	1	1	1	3	3	6	0	4	2	1	1	0	0	1	0	0	1	2	2	4	2	2	0	0	5	4	1	3	2	3	4	2
Otu00335	1	4	1	3	1	2	0	2	2	3	2	0	2	2	0	2	2	3	2	1	1	2	0	2	1	0	4	3	7	4	1	3	2	2	5	1	4	2	2	1	1	0	1	0	2	1	0	1	0
Otu00336	0	1	0	0	0	1	2	2	0	0	0	1	1	2	5	5	2	3	4	8	0	2	1	2	2	2	2	0	3	0	2	3	0	2	1	2	1	0	1	4	0	1	3	2	0	2	1	2	0
Otu00337	1	1	0	1	1	1	3	1	1	1	0	0	1	0	5	4	1	1	1	6	0	5	3	3	3	2	2	0	1	0	0	0	1	0	3	4	2	3	0	0	0	4	1	0	0	4	0	1	1
Otu00338	3	1	0	2	2	2	1	5	1	5	2	2	1	0	2	0	2	0	3	4	2	0	1	0	1	1	7	10	4	0	3	0	2	3	0	1	0	2	5	3	1	1	2	2	2	1	1	0	1
Otu00339	2	1	2	1	2	2	9	6	9	3	0	2	2	2	5	9	8	8	2	4	0	0	2	1	0	2	0	0	0	1	0	0	0	0	0	1	1	1	0	1	1	0	2	2	1	2	0	0	1
Otu00340	4	1	0	0	1	1	3	2	0	0	1	0	0	0	0	0	0	2	1	1	0	1	1	0	1	4	3	6	5	5	0	1	1	1	2	1	1	2	0	0	3	1	1	0	3	0	0	2	2
Otu00341	2	1	0	2	2	0	1	3	2	2	3	0	3	5	1	2	0	0	3	0	0	1	0	0	0	2	2	3	7	5	5	2	2	8	6	2	1	2	2	3	2	1	0	0	0	1	0	0	0
Otu00342	2	0	0	2	6	4	5	0	5	2	2	0	9	1	4	1	3	2	4	2	4	2	4	1	2	2	0	1	0	1	0	0	0	1	1	0	0	1	1	1	0	1	0	0	1	4	1	2	0
Otu00343	1	0	2	1	0	1	0	0	0	0	1	1	1	1	0	1	1	0	1	3	2	6	3	3	7	7	0	0	0	3	2	1	3	0	0	3	1	0	1	1	0	0	1	0	5	2	0	2	2
Otu00344	2	0	0	0	0	0	0	2	0	0	0	0	0	1	1	0	0	0	2	0	3	5	2	1	1	3	0	2	1	0	2	1	1	2	2	0	2	1	2	1	2	5	4	5	1	1	2	1	1
Otu00345	0	2	1	0	1	0	0	1	0	1	1	2	1	1	3	2	1	1	1	0	4	3	3	4	7	3	0	0	0	0	1	0	0	1	1	3	3	0	0	1	0	0	3	4	2	1	2	2	6
Otu00346	4	3	1	1	4	4	2	2	2	6	1	5	5	2	2	2	2	1	1	1	0	0	0	0	0	2	1	1	2	1	1	0	0	1	0	0	0	0	0	2	3	2	2	4	2	1	3	1	0
Otu00347	2	2	1	0	2	3	3	2	0	5	1	2	2	2	2	1	3	1	3	2	6	5	5	5	8	4	0	2	1	0	1	1	1	2	0	1	2	1	1	0	0	0	1	1	1	2	2	2	0
Otu00348	6	3	3	4	5	7	7	4	2	5	1	6	2	5	0	0	4	1	5	2	0	2	1	1	1	1	0	3	0	0	0	0	1	3	1	0	0	0	0	1	0	0	0	1	0	2	1	1	0
Otu00349	0	1	5	4	3	2	3	10	3	0	5	2	2	2	4	4	3	5	2	2	1	2	1	3	2	3	0	1	1	1	0	0	0	2	2	0	0	0	0	2	2	2	1	1	1	2	0	2	0
Otu00350	1	2	4	2	5	4	0	0	1	3	0	0	1	5	0	2	1	4	2	1	1	2	2	1	1	1	1	2	1	0	2	0	2	1	0	1	1	0	0	1	2	1	0	1	0	0	0	1	1
Otu00351	3	5	3	5	4	3	3	3	4	3	2	4	6	5	2	2	7	6	0	7	0	1	1	2	0	1	2	2	2	0	0	1	1	0	0	1	0	1	0	1	0	0	1	1	0	0	0	0	1
Otu00352	2	3	1	0	2	0	2	4	1	0	4	4	3	1	1	2	3	3	4	2	0	0	0	0	0	0	5	0	0	1	1	1	1	1	0	0	0	0	0	0	0	0	3	1	7	0	1	0	1
Otu00353	0	1	1	1	5	2	1	1	0	1	1	1	2	1	1	1	2	2	1	1	1	1	1	2	2	2	1	2	1	0	0	0	0	3	1	0	1	2	1	2	0	1	3	4	1	2	2	2	0
Otu00354	1	0	3	2	2	1	1	0	1	2	2	0	1	1	1	0	0	1	1	0	4	2	4	1	5	3	1	0	0	0	0	0	0	0	0	1	1	3	0	1	0	2	3	1	2	2	1	3	1
Otu00355	2	3	1	1	1	0	1	3	6	2	2	0	1	2	1	0	1	3	0	2	0	1	0	0	1	1	1	2	1	6	3	4	3	5	2	2	0	2	0	2	1	0	0	0	0	1	1	0	0
Otu00356	1	0	2	2	0	2	0	2	2	0	1	1	1	2	1	0	0	0	0	1	2	5	2	3	2	2	0	0	0	0	0	0	1	0	0	0	2	1	0	1	0	0	0	2	3	6	4	4	5
Otu00357	2	0	0	3	4	2	1	2	2	2	0	2	6	4	3	0	6	1	1	1	3	0	0	2	3	5	2	2	0	3	2	2	1	1	0	2	2	1	3	2	0	0	1	0	0	2	2	1	1
Otu00358	1	5	1	2	1	3	4	1	3	3	1	4	6	1	4	3	2	1	1	2	2	0	0	0	1	2	1	2	0	2	0	2	2	1	0	0	0	2	1	1	1	0	1	0	1	0	0	1	1
Otu00359	3	0	1	1	3	0	0	2	1	3	1	2	1	4	3	2	4	2	2	2	0	0	0	0	0	1	0	0	0	0	0	1	0	0	0	0	0	0	0	1	0	1	1	0	0	1	0	0	0
Otu00360	0	2	2	1	0	2	1	1	1	3	3	2	1	2	3	0	0	0	0	3	1	2	0	0	0	0	4	4	1	6	7	6	4	3	4	1	2	2	0	0	1	0	0	0	0	0	1	3	0
Otu00361	4	1	2	6	3	3	1	0	0	4	1	3	4	0	9	8	7	1	5	6	0	0	1	0	0	0	0	0	0	1	0	1	0	1	0	1	0	0	5	0	6	1	0	4	1	0	0	0	2
Otu00362	0	2	3	4	1	0	2	1	1	3	1	1	3	1	0	3	3	2	3	0	0	1	0	0	3	2	2	5	1	1	1	0	0	0	1	0	1	1	2	2	3	1	5	1	4	2	0	1	1
Otu00363	0	0	1	0	1	2	1	1	3	0	0	1	0	0	0	2	3	0	1	1	0	2	2	0	3	0	0	0	0	0	2	1	2	0	1	3	3	2	2	0	1	1	3	1	2	3	1	2	3
Otu00364	0	1	0	0	0	0	0	1	1	1	1	1	2	0	1	0	0	0	1	0	0	1	1	3	1	1	1	3	0	1	1	4	0	2	2	0	2	0	3	0	0	1	0	0	0	1	1	1	1
Otu00365	2	0	2	3	3	2	2	3	2	4	6	5	0	3	6	4	1	2	3	4	1	0	0	2	0	3	0	0	1	0	1	0	0	3	1	0	1	2	1	3	4	0	1	0	1	2	0	2	1
Otu00366	0	0	1	0	0	1	0	0	1	1	2	0	0	1	0	0	0	0	0	0	1	0	0	0	0	1	2	1	1	5	0	2	1	4	0	0	0	1	1	0	0	2	0	0	1	0	0	2	1
Otu00367	1	0	4	3	3	2	0	0	0	2	1	0	3	1	0	1	6	0	1	3	0	0	1	0	1	0	4	1	3	4	3	3	5	1	1	0	2	0	0	2	1	0	2	0	1	2	0	2	1
Otu00368	1	0	1	2	3	3	6	1	1	3	4	6	1	2	2	3	3	5	2	4	1	0	0	2	2	1	0	1	0	0	0	0	0	0	0	0	2	0	0	0	0	0	2	0	0	1	0	0	0
Otu00369	8	7	6	4	3	3	8	7	6	6	11	4	8	7	0	2	2	0	3	1	1	0	0	1	0	0	0	0	0	0	0	0	0	0	0	0	1	1	0	0	0	0	0	0	1	0	2	0	0
Otu00370	0	0	1	1	0	1	0	0	2	1	0	0	0	2	0	0	1	0	0	0	0	0	2	0	5	1	1	1	5	3	1	0	1	1	1	1	1	0	1	2	0	1	0	0	0	0	0	1	0
Otu00371	0	0	0	0	1	1	0	1	0	0	0	1	1	0	1	1	2	1	0	0	0	1	6	2	1	2	0	0	0	0	1	0	0	1	0	3	0	1	3	2	0	0	0	3	1	1	0	0	1
Otu00372	1	1	0	0	1	2	0	1	1	0	0	0	0	1	0	1	0	1	2	0	5	3	3	2	5	3	0	0	0	1	1	0	2	0	0	0	3	1	0	0	0	1	2	0	1	1	2	1	4
Otu00373	3	2	3	1	0	1	1	2	1	2	3	1	0	3	1	4	2	2	0	2	2	0	1	1	0	1	2	2	3	3	5	1	4	4	4	2	1	1	2	0	0	2	0	0	0	2	0	0	0
Otu00374	0	0	0	0	0	0	0	0	0	0	0	0	0	0	1	0	4	1	0	2	9	5	4	10	4	8	0	0	0	0	0	0	0	0	0	0	1	1	1	1	1	2	1	5	2	1	3	2	4
Otu00375	1	1	0	2	1	0	3	1	0	0	2	4	2	1	0	0	0	0	0	0	0	0	0	1	1	0	2	1	0	0	0	0	2	2	1	5	3	3	0	0	1	1	4	1	2	3	4	3	2
Otu00376	0	0	0	0	0	0	0	0	0	0	0	0	0	0	0	0	0	0	0	0	0	0	0	0	0	0	2	1	1	2	1	0	1	1	3	0	0	0	1	0	1	1	0	0	1	0	0	0	0
Otu00377	0	2	0	0	0	1	0	2	1	0	3	2	0	2	2	4	4	1	0	1	2	0	1	0	0	0	1	2	1	1	0	0	1	2	0	0	1	0	4	6	3	1	1	4	0	0	3	0	2
Otu00378	0	1	2	3	0	0	0	0	2	0	0	2	2	1	3	0	4	2	5	0	0	1	0	0	0	0	5	3	0	3	0	1	0	0	2	2	0	0	1	0	2	2	1	5	3	1	1	0	1
Otu00379	3	1	0	1	1	1	2	2	2	2	1	1	1	1	1	1	0	0	0	1	1	1	2	0	2	2	1	0	1	2	1	0	2	1	0	0	0	2	1	1	0	1	0	1	0	1	1	2	0
Otu00380	2	2	4	9	6	3	6	3	5	3	2	1	1	2	0	1	0	0	1	2	1	0	0	0	0	0	4	3	3	1	2	3	0	7	4	0	2	1	0	0	1	0	0	1	1	0	0	1	0
Otu00381	2	3	3	1	1	3	4	3	2	1	6	0	1	5	1	0	0	0	1	2	1	0	2	0	0	0	0	1	0	0	2	0	2	0	0	0	0	0	0	1	1	0	0	0	0	0	0	0	0
Otu00382	2	9	1	1	3	7	4	4	1	4	3	3	3	3	0	3	4	2	3	1	0	1	1	2	0	0	0	0	0	2	0	1	3	2	1	0	1	1	0	0	1	0	0	0	0	0	1	0	1
Otu00383	2	0	1	0	1	0	0	0	0	0	0	0	1	0	1	0	2	0	2	2	5	3	4	5	3	0	0	0	0	1	0	0	0	1	2	2	0	0	0	1	0	0	0	0	0	2	5	5	6
Otu00384	0	3	5	2	2	0	0	2	2	3	0	3	0	3	1	0	0	2	0	0	1	0	1	3	2	1	3	5	1	2	2	2	3	3	3	1	2	2	0	5	1	1	1	1	2	1	0	0	0
Otu00385	1	1	1	0	2	1	1	1	0	0	2	0	2	0	1	2	0	0	2	0	1	2	0	1	0	1	0	1	2	5	2	1	4	1	3	5	0	3	1	2	1	1	0	2	1	1	0	1	0
Otu00386	1	0	0	0	2	1	0	0	1	0	0	0	0	0	2	1	0	1	1	2	3	2	0	1	4	2	0	2	0	0	0	2	0	0	3	3	3	3	1	0	0	1	3	0	2	2	2	3	0
Otu00387	1	2	3	2	2	3	1	2	2	2	3	2	1	2	0	0	0	3	1	0	0	0	0	0	0	0	1	0	2	4	3	4	5	0	3	3	0	3	1	2	0	0	1	0	2	0	0	2	1
Otu00388	1	0	2	0	5	4	0	0	1	0	0	0	2	2	4	2	5	2	3	0	3	3	3	2	0	2	0	0	0	0	2	2	1	1	2	2	0	3	0	0	0	1	1	1	1	0	1	1	1
Otu00389	1	4	4	1	4	0	2	3	2	1	4	2	4	3	5	2	1	1	1	5	0	1	0	0	0	1	1	1	1	0	2	0	0	0	0	3	1	0	0	1	0	0	2	1	1	2	1	0	0
Otu00390	0	0	0	1	0	0	1	0	0	1	0	1	2	1	1	1	1	2	0	0	1	0	1	1	2	0	1	0	1	2	2	4	1	0	1	1	1	0	1	0	0	1	0	0	1	1	0	0	0
Otu00391	0	0	1	0	0	0	0	0	0	1	0	0	0	0	0	0	1	0	0	0	7	0	4	6	0	4	0	0	0	0	1	1	1	0	0	2	0	5	1	0	0	1	1	1	3	1	2	3	4
Otu00392	7	4	2	1	3	1	3	5	4	2	4	2	2	3	9	6	3	4	0	3	0	0	0	1	1	1	1	0	0	1	0	0	0	1	0	1	1	0	0	2	0	0	0	1	1	1	0	0	0
Otu00393	1	5	3	2	0	4	0	0	2	1	1	2	4	2	4	4	3	1	4	2	1	0	0	1	1	1	1	0	0	1	0	1	0	1	0	0	0	0	1	0	0	0	1	0	1	0	4	0	0
Otu00394	1	2	1	2	2	1	2	2	4	1	0	0	1	1	0	1	2	1	1	0	1	1	1	0	2	0	1	4	0	2	1	0	1	1	1	0	1	1	1	0	2	0	3	0	1	0	1	1	1
Otu00395	3	2	0	1	0	2	2	0	0	2	1	2	0	3	6	3	1	2	3	7	2	0	0	0	0	0	0	0	3	0	0	1	0	0	1	1	0	1	3	3	3	1	1	0	1	0	0	0	0
Otu00396	0	3	2	0	3	2	0	1	0	0	1	1	3	1	1	2	2	3	3	2	0	1	2	2	0	1	0	0	0	0	1	2	1	2	0	2	2	1	0	1	3	0	0	1	0	3	2	0	1
Otu00397	3	0	1	3	4	1	4	0	6	3	1	2	3	3	0	0	2	0	3	1	0	2	1	1	1	1	0	0	1	0	0	2	1	0	1	0	2	1	2	2	2	1	3	0	1	2	0	2	1
Otu00398	0	0	1	0	0	0	0	0	1	0	0	0	0	0	1	4	1	1	1	1	6	4	4	1	3	5	0	0	0	0	0	1	1	0	0	2	0	0	0	0	0	1	1	1	1	2	2	1	3
Otu00399	2	2	2	0	0	0	2	0	0	0	0	2	0	0	0	1	2	0	1	3	3	0	2	2	3	1	0	0	1	0	2	0	0	4	3	2	1	2	0	0	0	0	0	0	1	0	1	2	3
Otu00400	0	0	2	0	0	0	1	1	0	1	0	1	3	1	3	1	0	0	0	1	0	1	1	0	0	0	0	0	2	0	0	0	0	0	0	0	1	0	0	0	0	0	1	1	0	0	1	0	1
Otu00401	0	1	0	1	1	0	1	0	0	1	0	1	0	0	1	1	0	0	0	1	0	1	0	1	0	0	1	0	1	1	0	3	0	2	2	1	1	1	0	0	0	0	1	0	1	0	0	1	0
Otu00402	1	1	0	1	2	2	1	4	2	2	2	2	4	4	0	3	4	5	4	3	3	0	0	1	1	1	0	0	0	1	0	0	0	1	0	0	0	1	1	1	2	0	2	1	1	1	1	0	0
Otu00403	1	1	1	1	1	0	0	2	0	1	0	0	1	0	2	0	4	2	4	1	1	0	1	0	0	0	3	3	2	2	0	2	2	0	0	2	2	3	3	1	3	1	1	1	1	1	0	1	0
Otu00404	0	2	2	0	0	0	0	1	1	0	0	0	1	0	2	1	1	1	0	0	1	1	0	1	0	1	2	0	2	0	0	0	2	1	1	0	0	0	0	0	0	1	1	1	1	0	2	0	0
Otu00405	1	1	0	1	2	0	0	1	2	1	2	3	0	2	1	1	1	3	0	2	0	1	0	0	0	0	0	3	0	0	2	0	0	3	0	1	1	4	0	0	0	1	1	0	0	3	2	0	0
Otu00406	4	3	1	1	7	1	2	4	1	3	1	2	3	1	0	1	3	1	4	2	0	0	1	0	2	1	3	0	0	0	1	0	1	2	0	2	1	0	0	0	0	0	0	1	0	1	0	1	0
Otu00407	0	1	0	0	0	0	0	0	1	0	0	0	0	0	0	0	2	0	1	0	4	7	3	4	3	5	0	0	1	0	0	0	0	0	1	2	2	1	0	1	0	2	0	3	2	0	0	4	2
Otu00408	2	1	1	0	0	1	2	1	0	2	1	1	0	1	1	1	2	0	0	2	3	3	0	3	2	0	0	0	0	1	0	0	1	1	2	0	1	0	0	0	0	2	0	1	0	1	2	3	1
Otu00409	0	0	0	0	0	0	0	0	0	0	0	0	0	0	1	0	1	1	1	2	3	2	3	6	2	4	1	0	0	2	1	0	1	2	0	0	1	1	0	0	0	3	2	4	0	1	1	2	4
Otu00410	0	0	0	0	0	0	0	0	0	0	0	0	0	0	0	0	0	1	0	0	3	2	5	3	2	6	0	0	0	0	0	0	0	0	1	1	1	0	0	0	0	2	3	1	1	2	0	5	4
Otu00411	0	0	0	0	0	0	0	0	0	0	0	0	0	0	0	0	0	0	0	0	0	0	0	0	0	0	0	0	0	0	0	0	0	0	0	0	0	0	0	0	0	0	0	0	0	0	0	0	0
Otu00412	0	2	3	1	1	0	1	2	0	0	0	2	0	2	4	3	3	5	4	2	0	1	2	1	2	0	0	0	0	1	1	0	1	0	0	1	1	1	1	1	2	0	3	1	1	2	1	1	0
Otu00413	7	2	4	2	3	3	1	0	0	2	0	2	3	4	3	5	3	1	2	1	1	1	0	0	0	0	2	0	0	1	1	1	0	1	2	1	0	1	0	2	0	0	0	0	0	1	0	0	2
Otu00414	0	0	0	0	0	0	0	0	0	0	1	0	0	0	0	0	1	1	0	0	0	3	4	2	1	2	0	3	2	1	1	1	0	2	2	1	2	2	1	0	1	1	1	0	0	4	0	1	0
Otu00415	1	0	1	0	1	1	0	0	1	1	1	0	3	0	1	2	1	2	0	5	0	1	1	0	3	2	1	3	3	2	0	0	0	0	1	0	1	0	3	1	1	1	0	4	0	1	0	0	1
Otu00416	0	1	0	0	0	1	0	0	1	0	0	0	2	2	2	1	0	0	2	0	1	1	1	2	0	1	0	0	0	0	0	1	0	0	0	0	0	3	4	1	7	1	2	2	2	1	2	3	1
Otu00417	0	0	1	1	0	0	0	1	3	1	1	0	2	3	0	3	0	1	0	1	0	0	0	0	1	0	1	3	1	4	1	8	1	4	2	2	0	0	1	2	0	0	0	0	0	1	0	0	3
Otu00418	2	4	2	2	1	0	0	0	1	1	0	3	2	2	3	3	3	2	0	0	0	1	1	2	0	0	2	3	1	2	2	1	1	2	2	2	1	0	0	0	0	0	0	0	1	0	0	1	0
Otu00419	0	0	0	0	0	0	0	0	0	0	0	0	0	0	0	0	0	0	0	0	0	0	0	0	0	0	0	0	0	0	0	0	0	0	0	0	0	0	9	8	5	5	11	10	2	4	5	1	2
Otu00420	1	4	2	3	0	1	1	1	1	3	2	1	0	1	1	2	0	1	1	3	1	2	2	1	3	0	0	1	0	0	0	0	0	1	1	0	1	1	1	0	1	1	1	0	0	2	1	0	1
Otu00421	1	0	0	0	1	0	1	0	1	1	1	1	0	0	0	1	2	2	0	1	0	1	0	0	0	1	1	0	1	1	3	2	1	1	1	4	1	1	1	1	0	0	0	0	0	0	1	0	3
Otu00422	0	2	1	0	1	1	0	0	2	0	2	1	0	1	1	0	1	0	1	1	0	2	1	1	0	0	1	1	4	3	2	0	2	1	2	2	1	1	0	0	1	0	1	2	0	1	0	1	0
Otu00423	1	0	2	1	1	0	0	0	1	0	0	0	4	0	1	0	0	0	0	0	3	4	3	0	2	2	0	0	0	1	2	0	0	0	0	3	3	4	0	2	0	1	0	1	1	0	1	1	3
Otu00424	0	0	0	0	0	0	0	0	0	0	1	0	0	0	0	0	0	0	0	0	0	0	0	0	0	0	0	0	0	0	0	0	0	0	0	0	0	0	2	2	0	3	1	2	4	0	2	2	0
Otu00425	0	3	0	0	0	2	1	2	0	2	1	3	1	2	0	1	5	1	1	1	2	2	1	2	2	0	1	0	0	0	0	1	0	2	1	2	0	0	2	1	0	0	2	3	0	0	1	2	0
Otu00426	1	0	0	1	0	1	0	0	1	0	0	0	0	0	0	1	0	0	1	0	0	0	0	0	0	1	0	0	0	0	1	0	0	0	0	0	0	0	0	0	0	0	1	0	0	0	0	1	0
Otu00427	3	4	2	3	1	2	5	1	5	0	0	3	2	1	6	4	4	4	2	0	0	1	0	1	2	2	0	0	0	0	0	0	0	0	0	0	0	1	2	3	1	0	1	1	0	0	1	0	0
Otu00428	0	0	0	0	0	0	0	0	0	0	0	0	0	0	0	0	0	0	0	1	0	0	0	0	0	0	0	0	0	0	0	0	0	0	0	0	0	0	0	0	1	0	0	0	0	0	0	0	0
Otu00429	0	0	0	0	1	0	0	0	0	0	0	0	0	0	0	0	0	0	0	0	0	0	0	0	0	0	0	0	0	0	0	0	0	0	0	0	0	1	0	0	0	0	0	0	0	0	0	0	0
Otu00430	1	1	1	3	3	1	3	0	2	2	4	1	1	2	2	2	5	4	2	1	1	1	0	1	1	2	0	1	0	0	0	0	1	0	1	0	0	3	2	1	0	0	1	0	0	0	2	0	0
Otu00431	0	0	0	0	0	0	0	0	0	0	0	0	0	0	0	0	0	0	0	1	1	0	0	0	0	0	0	0	0	0	1	0	1	0	0	0	0	0	4	3	6	2	0	1	0	0	1	0	1
Otu00432	0	0	5	6	2	1	5	5	3	1	6	7	2	3	1	0	0	0	0	0	0	0	0	1	0	0	0	0	0	0	2	0	4	0	0	0	1	0	0	0	1	1	2	0	1	0	0	1	0
Otu00433	0	0	0	0	0	1	0	0	0	0	1	1	1	0	1	0	2	4	2	1	5	3	3	1	0	1	0	1	1	0	1	0	0	0	0	0	1	3	3	1	0	1	0	2	0	1	1	0	0
Otu00434	0	1	1	0	1	0	1	0	0	0	0	0	2	0	1	1	1	2	5	2	4	1	3	3	0	0	0	0	0	0	0	0	1	0	0	0	0	1	1	0	0	0	1	1	1	1	0	0	3
Otu00435	2	0	2	0	1	1	0	1	1	0	0	1	3	2	0	1	1	0	0	0	0	1	0	0	0	1	0	0	0	0	0	1	0	0	0	0	1	0	0	3	4	1	2	3	1	3	7	0	4
Otu00436	1	2	2	0	0	2	2	0	1	1	0	1	1	0	0	0	0	1	0	0	0	0	0	0	0	0	0	2	3	0	1	1	1	1	0	0	0	4	2	2	2	1	0	2	1	0	1	0	0
Otu00437	0	0	1	0	0	0	0	0	0	0	0	0	0	0	0	1	2	0	0	1	2	0	4	1	3	5	0	0	0	1	1	0	3	0	0	1	1	3	1	0	0	1	1	1	2	0	1	2	3
Otu00438	1	1	0	0	0	1	1	2	1	0	1	2	1	0	2	1	1	0	2	2	0	1	1	0	0	0	5	0	1	0	1	1	0	2	1	2	2	1	1	0	2	2	0	0	1	1	3	2	0
Otu00439	0	0	0	0	0	0	0	0	0	0	0	0	0	0	0	0	0	0	0	0	0	0	0	0	0	0	0	0	0	0	0	0	0	0	0	0	0	0	0	6	51	0	1	6	0	1	0	0	0
Otu00440	0	0	0	0	0	1	0	0	0	0	0	0	0	1	0	0	0	0	0	0	0	0	0	0	0	0	0	0	0	0	0	0	1	0	0	0	0	0	2	3	3	3	4	1	5	4	5	6	3
Otu00441	0	1	1	0	1	0	0	1	0	2	0	0	1	1	0	0	1	0	0	3	1	1	0	0	0	1	2	4	3	0	1	1	2	3	2	2	2	2	2	1	0	0	1	0	1	2	4	1	3
Otu00442	0	0	0	0	2	0	2	0	0	0	1	0	1	1	1	1	0	0	0	1	0	0	0	0	0	0	5	0	5	1	1	1	2	0	2	1	1	1	1	0	3	0	1	0	1	0	0	1	0
Otu00443	0	2	0	1	0	0	0	1	0	1	2	1	1	0	5	2	1	3	3	6	1	3	3	4	0	2	0	0	0	0	0	0	0	0	0	0	0	0	0	0	0	0	0	0	1	0	0	0	1
Otu00444	0	1	2	0	1	0	0	0	1	0	1	0	0	0	2	2	3	0	3	2	0	0	2	2	1	0	0	0	0	0	1	0	0	0	0	1	0	0	1	1	1	3	3	1	1	2	2	1	2
Otu00445	1	2	0	1	0	0	1	1	1	1	2	5	2	2	1	0	1	2	0	1	1	0	1	1	2	1	0	1	0	0	0	0	0	0	1	1	0	0	3	1	0	2	0	2	0	0	1	1	2
Otu00446	1	0	0	1	2	2	0	0	1	0	2	1	2	0	0	1	0	2	0	1	3	2	2	2	0	0	1	1	0	1	1	0	1	1	2	2	2	3	0	0	1	2	1	0	0	0	2	0	1
Otu00447	3	0	0	1	1	4	0	2	1	3	0	0	0	1	0	0	1	0	0	0	0	0	0	0	0	0	1	1	3	0	1	3	2	2	2	1	1	1	3	1	0	2	2	1	1	0	0	2	0
Otu00448	1	3	1	5	1	2	2	1	0	1	0	1	2	3	0	1	2	0	1	1	1	2	3	1	1	0	0	0	0	0	0	0	0	0	0	1	0	0	0	1	3	0	1	2	2	2	1	0	1
Otu00449	1	1	1	0	2	0	1	0	1	0	3	0	1	1	0	2	1	2	0	2	0	0	0	1	2	2	2	1	0	0	1	2	1	0	0	1	1	4	1	0	1	2	0	1	0	0	0	0	1
Otu00450	1	1	4	2	3	1	1	1	1	1	1	0	1	4	0	3	1	3	5	3	1	1	0	0	0	4	0	0	1	0	0	1	0	0	0	1	0	1	0	0	0	0	0	1	0	1	1	1	2
Otu00451	2	4	2	3	2	2	2	3	1	3	1	0	2	2	1	1	0	2	1	2	0	0	1	2	0	1	0	1	0	0	1	0	0	0	0	0	0	0	2	1	2	0	0	1	1	0	3	1	1
Otu00452	0	1	0	0	0	1	0	0	0	1	1	2	0	1	0	3	2	2	1	0	0	0	3	0	2	0	0	1	0	1	0	0	0	0	0	0	1	1	0	1	0	0	2	0	0	1	1	0	2
Otu00453	1	0	1	0	3	1	1	0	1	0	0	2	2	0	1	2	1	2	1	0	0	0	2	1	0	1	0	3	1	1	2	2	0	0	0	2	4	2	0	3	0	0	1	1	1	0	1	1	1
Otu00454	1	4	0	1	1	0	0	1	2	1	0	2	0	1	1	4	0	2	1	2	0	1	0	0	0	0	2	0	1	0	1	0	3	1	0	1	1	1	1	2	1	1	0	0	0	1	0	0	0
Otu00455	0	0	0	0	0	0	0	0	0	0	0	0	1	0	1	0	0	0	1	0	0	0	1	3	0	1	1	1	2	0	0	0	0	0	0	0	3	0	1	2	3	1	3	3	2	3	2	1	1
Otu00456	3	3	2	3	0	2	4	0	2	0	0	0	1	3	1	3	2	6	0	1	1	1	0	0	0	1	0	1	0	0	0	1	1	3	0	1	0	0	0	0	0	0	0	0	0	0	0	0	1
Otu00457	1	3	1	0	4	3	1	3	1	0	0	0	1	0	0	2	1	1	2	2	0	0	0	0	1	0	2	0	2	0	0	0	1	0	2	1	0	0	1	0	0	1	0	0	0	2	2	2	2
Otu00458	0	1	0	0	0	1	0	0	0	0	0	0	0	0	0	0	0	2	1	0	1	0	0	2	0	0	1	1	1	0	2	0	0	1	0	1	2	0	0	1	1	1	0	0	1	1	1	1	0
Otu00459	0	1	1	0	2	1	2	2	5	4	4	3	1	1	6	2	1	2	2	3	1	0	1	0	1	1	2	0	0	0	0	0	0	0	0	0	0	0	1	1	1	0	1	1	0	0	2	0	0
Otu00460	0	0	0	0	0	0	0	0	0	0	0	0	1	0	1	1	0	1	0	1	1	2	0	2	3	2	0	0	0	0	0	0	0	0	0	1	0	1	2	2	0	1	0	1	3	1	1	0	1
Otu00461	0	1	0	0	0	1	0	0	3	0	0	1	0	0	0	0	0	1	0	0	0	0	0	0	0	0	1	5	3	0	0	0	2	0	0	0	0	1	0	0	3	1	4	4	2	2	0	1	0
Otu00462	0	0	0	0	0	0	0	0	0	0	0	0	0	0	0	0	0	0	0	0	0	0	0	0	0	0	0	0	0	0	0	0	0	0	0	0	0	0	9	6	0	3	6	9	5	6	3	4	0
Otu00463	0	2	1	0	0	0	3	0	0	0	0	2	1	3	0	0	1	0	2	0	0	0	1	1	0	0	1	2	4	2	2	1	0	3	2	2	2	1	0	1	2	2	0	2	1	0	2	3	1
Otu00464	1	0	2	0	1	1	1	2	1	0	1	3	0	3	1	1	0	0	1	1	1	0	0	1	2	1	1	1	1	2	2	1	0	0	3	1	0	0	0	0	0	0	0	0	1	1	0	0	0
Otu00465	2	2	0	2	0	0	3	1	1	0	0	2	4	0	1	0	2	1	1	1	1	0	0	0	0	0	0	1	1	0	0	0	0	0	0	2	0	1	0	0	1	2	2	0	0	0	2	0	0
Otu00466	1	0	1	2	3	1	1	3	1	2	0	4	4	2	0	1	0	0	1	0	0	0	0	1	0	0	0	0	0	1	2	2	1	3	1	2	0	2	0	0	1	1	0	0	0	0	0	1	0
Otu00467	3	2	1	3	1	0	2	3	4	2	2	1	3	2	1	2	4	2	2	1	1	3	0	0	1	0	3	1	0	0	0	0	0	0	1	0	0	0	0	1	0	1	1	0	1	0	1	0	1
Otu00468	0	1	1	1	1	1	1	0	1	0	0	0	0	0	0	1	0	2	1	1	1	3	2	0	3	3	1	1	0	0	0	0	1	0	2	1	1	3	1	2	2	0	2	2	2	2	2	0	1
Otu00469	0	0	0	1	0	0	0	1	1	0	1	0	0	0	1	0	0	0	0	0	1	3	1	4	1	0	0	0	0	0	0	0	1	0	0	0	2	3	0	2	1	0	1	2	2	2	1	5	1
Otu00470	0	0	1	0	0	3	1	0	2	1	1	0	0	1	0	0	1	0	0	0	0	0	1	1	0	0	5	1	0	2	0	1	1	1	0	3	1	0	1	0	0	0	0	0	1	0	0	2	3
Otu00471	2	1	0	1	1	0	0	0	0	0	1	0	0	0	0	0	1	1	1	1	1	1	0	0	2	1	1	0	0	0	0	1	0	0	1	2	0	0	2	0	2	0	1	0	0	3	1	0	3
Otu00472	1	1	0	1	0	0	0	1	1	0	0	0	0	0	1	0	0	1	0	0	3	1	3	3	3	1	0	0	0	0	0	2	3	1	0	1	0	0	0	0	0	2	0	0	0	1	1	3	2
Otu00473	0	0	0	0	0	0	0	0	0	0	0	0	0	0	1	3	2	0	2	1	1	3	4	2	3	2	1	0	0	0	0	0	0	0	2	0	2	1	0	1	1	0	0	0	1	1	1	4	3
Otu00474	2	1	2	0	0	3	1	2	1	0	0	0	1	1	0	0	2	1	1	0	1	0	2	0	0	0	1	1	2	1	3	2	1	0	0	1	1	0	0	0	0	1	0	0	0	1	0	0	1
Otu00475	2	3	3	2	0	2	1	3	2	2	1	3	1	3	2	2	3	2	1	5	1	0	0	1	2	0	0	0	0	1	0	0	0	0	0	0	0	0	0	0	0	1	0	0	0	0	0	0	1
Otu00476	2	2	1	0	2	0	1	1	0	0	0	0	1	0	0	3	0	1	2	0	0	1	0	0	0	1	0	1	0	3	0	2	2	1	0	0	0	1	1	0	0	0	3	0	0	1	1	1	2
Otu00477	0	0	0	0	0	0	1	0	0	1	0	0	0	0	0	0	0	1	1	0	2	2	2	1	3	1	0	0	0	0	2	1	0	1	0	0	0	0	1	0	0	1	0	1	3	0	0	1	3
Otu00478	0	2	0	2	0	1	1	2	1	1	0	1	0	0	1	1	0	2	0	0	1	0	1	0	0	0	0	0	0	0	1	0	0	1	0	0	0	0	0	0	0	0	1	0	0	0	0	1	0
Otu00479	0	0	0	1	1	2	4	0	1	0	1	2	0	0	1	0	2	0	0	0	0	0	0	1	0	1	1	1	2	0	2	4	3	1	0	0	2	3	1	1	0	1	0	2	0	0	0	0	0
Otu00480	0	0	0	1	1	0	1	0	0	0	0	0	0	0	0	1	0	0	1	0	0	0	0	0	0	0	0	0	0	0	0	0	0	0	0	0	0	0	0	0	0	0	0	1	0	0	0	0	0
Otu00481	0	0	0	0	0	0	1	0	0	0	0	0	1	1	1	2	0	0	0	0	0	0	1	0	1	0	2	1	1	3	1	3	1	1	0	0	1	1	1	0	1	0	1	0	1	0	1	0	0
Otu00482	1	1	0	1	1	1	0	0	0	2	0	1	0	1	1	1	0	0	0	1	1	3	3	2	3	2	0	0	0	0	1	1	0	3	0	1	1	2	0	0	0	0	0	0	1	0	1	0	0
Otu00483	0	0	1	1	0	0	1	0	0	0	1	0	0	0	1	1	0	1	2	0	1	0	1	2	0	1	0	0	0	0	0	0	0	1	1	0	0	0	0	6	3	3	5	4	0	1	2	3	0
Otu00484	2	0	0	0	1	2	1	0	2	0	0	2	0	1	0	3	3	1	0	6	1	1	1	1	2	1	1	0	0	2	0	0	0	0	0	1	2	0	0	0	0	0	1	0	0	0	1	0	0
Otu00485	1	1	1	1	0	1	0	1	2	0	0	1	0	1	0	2	0	1	0	1	0	0	1	0	0	0	2	1	1	1	1	2	0	2	1	0	1	0	3	2	1	1	0	1	0	0	1	0	0
Otu00486	2	1	4	2	2	2	1	2	3	3	3	2	1	2	0	1	0	3	1	1	1	0	0	0	0	0	1	2	1	2	2	0	0	0	0	0	2	0	1	1	1	0	0	0	1	1	0	0	0
Otu00487	0	1	1	0	0	0	0	0	0	0	0	0	0	0	0	1	0	0	0	0	0	0	1	0	0	0	0	3	0	0	0	0	1	0	0	0	0	1	0	0	0	1	0	0	0	1	1	0	1
Otu00488	3	1	1	2	1	0	0	1	1	1	1	0	1	0	0	0	0	0	0	0	1	0	0	0	0	0	0	0	4	0	1	1	0	2	1	1	2	0	0	1	0	1	3	1	0	1	0	0	1
Otu00489	3	7	0	2	0	3	2	3	2	1	0	3	1	1	0	2	0	0	0	1	1	0	0	0	1	0	0	1	2	0	0	1	1	0	0	0	0	0	0	0	0	1	0	0	1	0	0	0	0
Otu00490	0	0	0	1	1	0	2	0	1	0	0	0	1	0	0	0	0	0	1	0	0	1	1	1	0	0	2	1	3	0	0	0	1	1	2	0	0	2	0	0	0	1	2	1	2	1	3	0	1
Otu00491	2	0	1	0	1	2	0	0	1	1	1	1	0	1	2	0	0	0	0	2	0	2	0	1	1	1	2	2	0	0	0	1	0	1	1	0	0	1	0	0	1	0	0	0	2	0	2	0	2
Otu00492	4	4	0	2	3	4	0	1	1	3	3	3	1	1	0	1	1	1	0	0	0	0	1	0	0	0	0	0	0	0	0	0	0	0	1	0	0	0	1	2	2	0	1	0	0	0	0	0	0
Otu00493	0	2	1	1	2	2	0	0	0	0	1	2	2	2	1	0	0	0	0	2	0	1	0	0	1	2	1	0	1	1	1	0	1	5	1	1	0	1	0	0	0	0	0	1	2	0	0	0	0
Otu00494	0	0	0	0	0	0	1	0	0	0	2	0	1	0	0	1	0	1	1	2	0	0	1	0	0	0	2	0	0	1	0	4	0	1	2	0	1	0	1	1	1	1	1	0	0	2	1	1	1
Otu00495	0	0	0	0	0	0	1	1	0	1	0	0	1	0	0	0	0	1	2	0	1	0	0	4	0	0	1	0	0	1	1	2	0	0	0	0	2	0	0	0	0	1	0	1	0	0	2	0	0
Otu00496	1	1	2	2	0	1	1	3	0	0	1	0	1	1	0	0	3	3	3	1	0	1	1	0	0	0	0	0	1	0	0	0	0	0	0	0	1	0	1	0	0	2	0	1	0	1	0	0	1
Otu00497	3	0	0	3	0	0	2	0	2	0	0	0	1	1	2	3	3	0	1	1	1	1	1	0	1	0	0	0	0	0	0	0	0	2	0	1	0	1	0	0	0	0	0	0	0	1	2	2	1
Otu00498	0	0	0	0	0	0	1	0	1	2	0	0	0	1	0	0	0	0	2	0	1	0	0	1	0	0	1	0	1	0	0	0	1	0	1	0	0	0	0	0	0	1	0	0	0	0	0	0	0
Otu00499	0	0	0	0	0	0	0	0	0	0	0	0	0	0	0	0	0	1	0	0	3	4	2	3	1	4	0	0	0	0	0	0	0	0	1	1	0	1	0	1	0	0	0	0	1	1	1	3	1
Otu00500	0	0	0	0	2	0	1	0	0	0	0	0	1	1	1	1	0	0	2	0	0	0	1	0	0	1	2	2	0	0	0	1	0	0	0	0	0	0	0	0	0	0	0	0	0	0	1	1	0
Otu00501	0	0	0	0	0	0	0	1	0	0	1	1	0	1	0	0	0	1	0	0	1	0	0	0	0	1	1	0	0	3	0	1	2	0	0	1	0	0	0	1	0	0	0	0	0	0	0	1	1
Otu00502	0	0	1	0	0	1	0	0	1	0	0	0	0	0	0	0	0	0	0	0	2	3	4	0	2	3	0	0	0	0	0	0	0	2	2	1	3	1	0	0	0	0	1	1	0	2	1	1	0
Otu00503	0	0	0	0	2	2	0	0	1	2	5	2	2	2	0	0	2	2	3	1	0	0	0	1	0	1	0	1	0	1	0	0	0	1	0	0	1	0	0	0	0	1	2	0	0	2	1	0	0
Otu00504	0	1	1	1	0	2	0	0	2	0	0	0	2	0	0	1	1	1	1	0	2	1	2	0	1	0	0	0	0	0	0	0	0	0	0	0	1	2	0	1	0	0	0	0	0	0	0	0	0
Otu00505	0	0	1	0	0	1	0	2	0	1	1	2	2	2	0	1	1	0	2	1	0	0	2	3	4	1	0	1	0	1	0	1	0	1	0	1	0	0	0	1	0	0	0	0	2	1	0	0	0
Otu00506	1	3	2	0	5	5	4	2	7	3	8	1	0	3	0	0	0	0	2	0	0	0	0	0	0	0	1	0	0	1	0	1	0	0	0	0	0	0	0	0	0	0	0	0	1	1	0	0	0
Otu00507	0	0	0	2	5	0	3	0	1	0	1	3	0	1	0	0	1	1	0	0	0	0	1	0	0	1	0	0	0	0	1	0	0	0	1	2	2	1	0	0	0	0	2	2	2	0	1	0	1
Otu00508	1	1	2	2	1	1	1	2	2	2	3	4	1	2	4	0	3	2	0	0	1	0	0	0	0	2	0	1	0	0	0	0	0	0	0	0	0	0	0	1	0	0	0	1	0	1	0	1	0
Otu00509	1	0	3	3	1	2	1	0	0	1	1	1	0	0	2	0	2	0	1	5	0	0	1	1	1	0	0	0	0	0	0	1	1	0	1	0	3	1	1	0	0	0	0	0	1	0	0	3	0
Otu00510	0	0	0	0	0	2	1	1	0	1	0	1	0	1	3	0	5	0	3	1	0	1	2	3	1	1	1	0	0	0	0	0	0	0	0	1	0	0	1	0	0	0	0	1	1	2	3	0	0
Otu00511	1	1	1	0	2	2	0	1	1	2	2	1	0	1	0	0	0	0	1	0	0	0	0	0	0	1	4	1	1	0	1	2	1	6	2	3	0	1	2	0	0	1	0	0	0	0	0	0	1
Otu00512	0	0	0	0	0	0	0	0	0	0	0	0	0	0	0	0	0	0	0	0	0	0	0	0	0	0	0	0	0	0	0	0	0	0	0	0	0	0	1	8	0	2	9	6	3	1	10	1	2
Otu00513	0	0	0	0	0	0	1	0	1	0	0	0	0	1	0	0	0	1	0	0	4	2	1	4	1	4	0	0	1	0	0	0	0	0	0	1	2	1	0	0	0	0	0	0	0	0	0	5	3
Otu00514	0	0	1	0	0	0	0	0	0	0	0	0	0	0	0	0	0	0	0	0	1	0	1	1	1	1	1	0	0	0	1	0	0	0	0	0	2	0	0	0	0	0	0	0	1	0	6	1	2
Otu00515	0	0	0	0	1	0	1	1	0	1	0	2	0	1	1	0	2	0	0	0	2	0	0	0	0	0	0	1	2	1	0	2	0	1	0	0	0	1	1	0	0	2	0	1	1	0	1	1	0
Otu00516	0	3	2	0	1	1	0	0	0	1	0	0	0	0	0	1	0	0	1	0	1	2	0	0	0	0	0	0	0	0	1	0	0	1	2	0	0	1	0	0	0	1	0	1	2	2	0	3	0
Otu00517	1	0	0	1	0	0	3	0	0	2	0	0	1	1	0	0	0	1	0	2	0	1	1	0	0	0	1	1	0	0	1	1	0	0	0	0	0	2	1	1	0	1	2	0	2	1	3	0	1
Otu00518	0	0	1	1	1	0	1	0	1	0	0	2	0	2	0	1	0	1	0	1	1	1	0	0	0	2	4	3	1	0	1	0	0	0	3	0	1	1	0	0	0	0	0	0	1	2	0	1	0
Otu00519	2	1	0	3	0	1	1	0	2	0	0	0	2	1	1	0	4	1	1	0	0	0	0	1	1	0	1	0	0	0	0	1	0	0	1	1	0	0	0	2	0	2	0	1	0	0	0	0	0
Otu00520	1	0	1	0	1	0	2	0	0	2	1	0	1	0	1	0	2	0	1	1	0	0	0	0	0	1	1	0	1	2	0	1	1	1	2	0	0	1	4	2	1	0	0	0	1	0	0	0	1
Otu00521	1	1	1	5	1	1	0	2	0	1	0	1	1	1	0	0	0	1	0	0	0	2	0	0	0	0	0	0	1	2	4	0	1	1	1	0	1	2	2	3	1	0	1	0	0	0	0	0	0
Otu00522	1	2	0	1	0	0	2	1	0	4	2	0	1	4	0	2	3	1	2	0	1	0	0	3	2	1	0	0	2	0	0	0	0	0	0	0	0	2	0	0	0	0	0	0	0	0	0	0	0
Otu00523	2	3	1	0	1	4	0	0	0	0	1	0	1	0	5	0	2	0	4	3	0	0	0	0	2	1	0	0	0	0	0	0	0	0	0	0	0	0	0	0	1	0	0	1	0	0	0	0	0
Otu00524	0	0	0	0	0	0	0	0	0	0	0	0	0	1	1	0	0	0	0	0	0	1	1	0	0	0	1	0	0	0	0	0	0	0	0	0	0	1	0	1	0	1	0	0	0	1	0	0	1
Otu00525	2	1	2	1	1	0	0	0	0	1	1	2	2	1	1	0	1	1	0	0	0	1	0	1	0	0	0	0	0	0	0	0	0	0	0	0	0	0	0	0	0	0	0	0	0	3	1	0	0
Otu00526	0	0	0	0	0	0	0	0	0	0	0	0	0	0	0	0	0	0	0	0	2	3	6	3	0	2	0	0	0	0	0	0	1	0	0	0	0	0	0	0	1	1	0	0	1	0	1	2	0
Otu00527	0	2	1	0	0	1	0	1	0	2	0	0	0	3	1	1	0	0	2	0	1	0	1	0	0	0	2	2	0	1	0	0	2	1	1	1	0	0	0	1	0	0	0	0	0	0	1	1	0
Otu00528	1	0	0	1	1	2	0	3	0	3	0	1	2	1	3	2	4	3	0	0	1	1	2	1	1	0	0	0	0	0	0	0	0	1	0	0	0	0	1	0	2	0	1	0	0	0	0	1	0
Otu00529	1	1	0	0	1	0	0	1	0	1	1	0	0	1	1	0	1	0	0	1	0	0	1	1	0	0	1	0	0	1	3	0	0	0	0	0	0	1	1	0	0	0	0	1	0	0	1	0	0
Otu00530	2	0	3	1	2	2	0	0	2	1	0	1	1	2	2	1	0	1	2	1	0	1	0	1	0	0	0	1	0	0	0	0	0	0	0	0	0	0	0	0	0	0	0	0	0	0	1	0	0
Otu00531	0	0	0	0	0	1	0	0	0	0	0	0	0	0	0	0	3	0	0	1	0	0	0	0	0	0	3	1	3	2	1	0	0	0	1	2	0	0	1	1	0	2	0	0	1	1	0	0	0
Otu00532	1	0	1	0	0	1	0	1	0	0	2	0	0	0	2	1	0	0	2	1	3	2	0	0	0	0	0	1	0	0	0	0	0	1	2	0	0	1	0	0	0	1	1	0	1	0	0	1	2
Otu00533	1	0	2	1	0	2	1	1	0	2	1	2	1	1	0	1	2	0	0	1	0	1	0	1	0	1	0	1	3	1	1	1	3	2	2	1	0	2	1	0	0	2	1	1	1	0	0	0	1
Otu00534	0	0	0	0	1	2	0	0	0	1	0	0	0	2	2	0	1	2	2	2	2	0	0	1	0	2	0	1	0	3	1	1	1	2	0	0	2	0	1	1	0	0	0	0	0	0	0	0	0
Otu00535	0	0	0	0	0	1	2	1	0	1	1	1	1	0	0	0	1	1	1	1	0	0	0	0	0	0	3	1	0	2	1	4	0	2	2	1	1	1	0	1	1	0	1	0	0	2	0	0	0
Otu00536	0	0	1	0	2	2	2	0	1	0	0	0	2	0	0	1	1	2	1	1	0	0	1	0	0	0	2	3	1	0	1	1	2	1	1	0	0	1	0	1	1	1	1	1	0	0	0	0	0
Otu00537	1	0	0	0	0	2	0	0	1	0	1	0	0	1	0	0	0	1	1	0	0	1	0	1	0	0	1	0	0	0	0	0	0	1	2	0	1	1	2	0	2	1	0	0	1	0	0	2	1
Otu00538	1	1	0	2	1	0	1	0	0	0	1	0	2	1	0	0	1	0	0	2	0	0	0	0	0	3	0	0	0	1	1	2	1	1	0	1	0	0	2	0	0	0	0	2	1	1	0	0	0
Otu00539	2	0	1	0	1	2	2	4	1	2	2	1	1	4	0	2	1	2	2	1	1	0	1	0	2	1	1	0	0	0	0	0	0	0	0	0	0	0	1	1	2	2	0	1	0	0	1	0	0
Otu00540	0	0	2	0	1	0	1	0	0	1	0	0	0	1	0	0	0	0	0	1	0	0	0	1	0	0	3	1	1	0	0	1	0	0	1	1	1	0	0	0	0	0	0	0	0	2	2	0	0
Otu00541	0	2	2	0	0	0	2	0	0	2	0	2	2	2	0	0	0	2	1	0	0	0	0	0	1	2	1	3	0	2	1	2	3	3	1	0	0	1	0	0	0	0	0	0	0	0	1	1	0
Otu00542	1	0	0	0	0	1	0	0	0	1	0	1	0	2	0	1	0	2	1	0	1	2	0	0	3	0	2	0	1	0	0	1	0	0	0	0	0	0	7	0	0	2	1	0	1	1	1	0	0
Otu00543	0	1	2	1	0	0	2	1	1	2	0	2	0	0	4	2	1	1	1	2	1	0	2	1	0	0	1	0	0	0	0	0	0	0	0	1	0	0	0	0	0	0	0	0	2	0	0	1	1
Otu00544	0	0	1	0	0	0	0	0	0	0	0	0	0	0	0	0	0	0	0	1	0	0	0	0	0	0	0	0	0	0	0	1	0	0	0	0	0	0	0	0	0	0	1	0	0	0	0	0	0
Otu00545	0	0	0	0	0	0	0	0	0	0	0	0	0	0	0	0	0	0	0	0	2	5	5	4	0	12	0	0	0	0	0	0	0	0	0	0	0	0	0	0	0	1	0	0	1	1	1	1	0
Otu00546	2	2	3	1	1	1	4	0	1	1	0	2	1	1	1	1	3	0	3	0	0	0	0	0	0	2	1	1	0	0	0	0	0	0	0	0	0	1	0	0	0	0	0	0	0	0	0	0	0
Otu00547	0	0	0	1	0	0	0	0	0	0	0	0	0	1	2	0	1	2	3	1	0	1	0	0	0	0	0	1	0	0	2	1	0	0	0	0	0	1	0	0	2	0	1	0	1	3	1	0	0
Otu00548	0	0	2	1	1	0	0	1	3	1	1	1	2	1	1	2	1	3	1	1	0	0	1	2	1	0	1	0	1	0	0	0	0	0	0	1	0	1	0	0	0	0	0	0	1	0	0	2	0
Otu00549	0	0	1	0	0	0	0	0	0	0	0	1	1	0	0	0	0	0	0	0	0	0	0	0	0	0	0	1	0	0	0	0	0	1	0	0	0	0	2	2	3	6	2	0	0	0	0	3	3
Otu00550	1	0	1	0	0	1	0	0	1	0	0	0	0	0	1	0	0	0	1	0	0	0	0	0	1	0	0	0	0	0	0	1	1	0	1	1	1	0	0	0	1	0	0	0	0	0	0	1	0
Otu00551	0	0	0	0	0	0	0	0	0	0	0	0	0	0	0	0	0	1	0	0	1	4	3	6	2	3	0	0	0	0	0	0	1	0	1	0	0	1	0	0	0	0	0	0	0	0	0	0	3
Otu00552	0	1	0	1	2	0	0	0	0	1	0	0	0	1	0	0	1	0	0	0	0	0	0	0	1	0	1	2	3	1	0	0	0	1	0	0	1	1	2	2	1	1	0	0	2	0	0	0	0
Otu00553	4	0	1	2	1	2	0	1	2	1	1	2	1	1	2	2	3	1	0	0	0	0	0	0	0	0	0	3	0	0	0	0	2	1	0	1	0	0	0	2	2	0	0	0	0	1	0	1	1
Otu00554	0	0	0	1	0	0	0	0	0	1	1	1	0	0	0	1	0	0	0	0	0	0	0	0	1	0	0	0	1	0	1	1	0	1	0	1	0	0	2	0	0	1	0	0	1	0	0	0	0
Otu00555	0	0	1	1	0	1	0	0	0	0	0	0	0	1	0	0	0	1	0	0	0	0	0	0	0	1	0	0	0	1	2	1	2	0	0	0	1	1	0	1	0	0	0	0	0	0	0	0	0
Otu00556	0	0	0	0	0	1	1	0	1	0	0	1	1	0	1	0	1	2	1	0	1	0	0	2	0	1	0	1	1	0	0	0	0	0	2	0	2	0	0	0	1	1	2	1	0	1	1	2	0
Otu00557	0	0	0	0	0	1	0	1	0	0	0	2	0	0	1	0	0	0	0	0	0	0	0	0	0	0	0	1	0	1	1	1	0	1	0	0	0	0	0	1	2	0	0	0	1	1	0	0	0
Otu00558	0	0	1	0	1	0	2	0	0	0	0	1	1	0	1	0	0	0	1	0	1	0	0	0	0	0	1	3	0	0	1	0	2	0	0	0	0	2	1	0	1	0	0	0	0	1	1	0	0
Otu00559	0	1	0	0	1	1	0	0	0	0	0	1	0	1	1	0	0	1	1	1	0	1	0	1	0	0	1	0	2	1	0	0	1	0	3	2	1	1	0	0	1	0	1	1	0	1	0	0	4
Otu00560	1	0	1	2	4	2	1	1	0	1	0	3	1	1	0	0	1	0	0	2	0	0	0	0	1	1	0	0	0	0	1	0	1	1	0	0	0	0	0	0	0	0	0	0	0	0	1	1	0
Otu00561	0	0	0	0	0	0	0	0	0	0	0	0	0	0	0	0	0	0	0	0	0	0	0	0	0	0	0	0	0	0	0	0	0	0	0	0	0	0	0	0	0	0	0	0	0	0	0	0	0
Otu00562	0	0	0	0	0	0	0	0	0	0	0	0	0	0	0	0	1	1	0	0	0	1	0	0	0	0	0	0	0	1	0	1	0	0	0	1	0	0	1	0	1	0	0	1	1	1	0	1	0
Otu00563	0	0	1	1	0	0	1	0	0	0	0	1	1	0	1	0	3	0	0	1	0	0	0	0	0	0	0	0	0	0	0	0	0	0	0	0	1	4	1	1	1	0	2	0	0	0	1	0	0
Otu00564	0	0	1	0	0	0	0	0	0	0	0	0	0	1	1	1	1	1	0	1	1	0	0	0	0	0	1	1	1	0	1	1	1	0	1	2	0	1	0	0	0	0	2	0	0	0	0	0	0
Otu00565	0	0	0	0	0	0	0	0	2	0	0	0	0	0	1	0	0	0	2	0	0	0	0	0	0	0	1	0	1	1	1	0	2	0	0	0	0	1	0	0	0	0	0	0	1	0	0	0	1
Otu00566	0	0	0	1	0	1	0	0	0	0	0	0	0	0	1	0	0	0	0	0	0	0	0	0	0	1	0	0	0	0	0	0	0	0	0	0	0	1	0	0	0	0	0	1	0	0	0	1	0
Otu00567	0	0	0	0	0	0	0	0	0	1	0	0	0	0	0	0	0	0	0	0	1	0	1	0	0	0	0	0	1	1	0	1	1	0	1	0	0	0	0	0	0	2	2	0	1	0	0	0	1
Otu00568	1	1	2	0	0	0	0	0	0	1	0	1	1	0	0	0	1	0	0	1	0	0	0	0	0	0	0	0	1	1	0	0	0	2	2	2	3	0	1	0	1	1	0	0	0	0	1	0	0
Otu00569	1	0	0	0	0	0	0	0	0	0	0	0	0	0	1	0	1	0	1	0	0	0	1	0	0	1	1	0	0	1	1	1	2	1	0	0	0	1	1	1	0	0	0	0	1	1	0	0	1
Otu00570	0	0	0	1	0	2	0	0	2	1	0	3	1	2	1	2	1	3	1	1	0	1	0	2	0	0	0	0	0	0	1	0	0	1	0	0	0	0	0	0	1	0	0	2	0	0	1	0	0
Otu00571	0	1	0	0	1	0	0	0	0	0	0	0	0	0	1	1	1	1	1	0	0	1	0	0	0	0	0	0	0	1	0	0	0	0	0	0	0	1	0	1	0	1	1	0	0	0	0	0	0
Otu00572	0	0	1	0	1	1	0	1	1	0	0	0	1	0	2	0	1	0	1	0	0	3	0	0	0	1	0	0	0	0	0	0	0	0	0	0	0	1	0	0	1	1	0	0	1	1	1	0	0
Otu00573	1	0	3	1	1	1	1	2	1	2	0	0	0	2	0	1	0	1	2	0	0	1	0	0	0	1	0	1	0	0	0	1	0	1	0	2	2	0	0	1	0	0	0	0	2	0	1	0	1
Otu00574	1	0	0	0	0	2	1	0	0	0	0	0	1	0	1	1	0	1	0	1	0	1	2	0	0	0	1	0	0	0	0	0	0	0	0	0	0	0	1	0	1	0	1	0	0	1	0	0	0
Otu00575	0	0	0	0	0	0	0	0	0	0	0	0	0	0	1	2	0	0	0	1	4	5	1	0	1	1	0	0	0	0	0	0	1	1	1	1	1	0	0	0	0	2	0	0	0	0	0	3	1
Otu00576	1	0	2	3	1	0	3	1	0	5	0	1	0	0	2	3	3	2	1	2	0	0	0	0	1	1	0	0	0	0	0	0	0	0	0	0	0	0	0	0	1	0	0	0	0	1	0	0	1
Otu00577	0	0	0	1	1	0	1	0	0	2	2	0	0	0	0	0	0	0	0	0	0	0	0	0	0	1	1	1	2	1	0	0	5	0	2	1	0	0	0	0	1	5	0	2	0	0	0	0	0
Otu00578	0	0	0	0	0	2	0	1	3	2	4	2	1	2	0	4	0	1	2	1	0	0	1	0	0	1	0	0	0	0	0	0	0	0	0	0	0	0	1	0	0	0	0	0	0	0	0	0	0
Otu00579	2	0	1	0	1	0	2	2	0	1	3	3	1	5	1	1	0	2	1	1	1	0	0	1	0	0	0	0	1	0	0	0	0	0	0	0	0	0	2	0	1	0	2	0	0	0	0	0	0
Otu00580	0	0	0	0	0	0	0	0	0	0	1	0	0	0	1	0	0	0	0	1	0	0	0	0	0	0	0	9	3	0	2	2	1	0	0	0	0	0	2	0	2	1	1	1	1	0	1	0	1
Otu00581	0	0	2	1	0	0	0	0	0	0	2	0	0	1	2	0	1	2	0	0	0	0	1	0	1	0	4	1	1	1	1	2	0	1	1	1	1	1	0	1	1	1	0	1	0	0	1	0	0
Otu00582	0	0	0	0	0	0	0	0	0	0	0	0	0	0	0	0	0	0	0	0	0	0	0	0	0	0	0	0	0	0	0	0	0	0	0	0	0	0	4	2	5	3	5	2	4	2	1	0	1
Otu00583	0	0	1	0	0	0	0	0	0	0	0	0	1	0	0	0	0	1	0	0	2	1	1	0	1	0	0	0	1	0	1	0	1	0	3	0	0	1	0	0	2	1	0	0	0	0	0	0	0
Otu00584	1	1	0	0	0	2	0	0	1	0	0	0	2	0	2	0	2	0	0	1	0	0	2	0	2	0	0	0	0	0	0	0	0	0	0	0	0	1	0	2	3	2	2	1	2	0	0	2	1
Otu00585	1	0	0	0	0	0	0	0	0	0	1	0	0	1	0	2	0	1	2	0	0	0	1	2	1	1	0	0	1	0	0	0	0	0	0	1	1	2	0	0	0	2	0	1	2	0	1	1	1
Otu00586	0	0	0	0	1	0	1	1	0	1	1	1	0	1	2	3	3	1	0	1	2	1	1	0	0	0	0	0	0	0	1	0	0	0	0	1	1	0	1	0	0	0	2	1	0	2	1	0	1
Otu00587	2	3	3	1	0	2	0	0	0	0	1	0	1	0	0	0	0	1	0	0	1	0	0	1	0	0	2	1	1	1	0	0	2	0	2	1	0	0	0	3	1	1	0	0	0	0	1	0	0
Otu00588	0	0	2	0	0	1	0	1	0	2	1	0	1	0	1	0	1	0	0	1	0	0	0	0	0	0	0	2	1	1	1	2	2	2	0	1	0	1	1	1	1	1	0	0	1	0	0	1	0
Otu00589	0	1	0	0	1	0	0	0	0	0	0	0	1	2	0	0	0	0	1	0	0	0	0	0	0	0	4	0	2	1	1	0	0	0	1	0	0	1	2	1	1	2	0	1	0	0	0	0	1
Otu00590	0	0	0	0	1	0	0	0	1	1	0	0	0	0	0	0	0	2	2	1	0	1	2	1	1	1	0	0	0	0	0	0	0	1	0	1	0	1	1	1	0	0	0	1	0	0	1	2	1
Otu00591	2	0	1	2	3	0	0	1	1	1	1	0	0	0	4	2	5	2	0	1	0	0	0	1	1	0	0	0	0	0	0	1	0	1	0	0	1	0	0	0	0	0	0	1	1	1	0	0	0
Otu00592	0	0	0	0	0	0	0	0	0	0	0	0	0	0	0	0	0	0	0	0	3	0	1	0	0	0	0	0	0	1	0	0	1	1	0	1	0	2	1	2	0	0	0	0	0	1	0	0	0
Otu00593	0	2	1	0	1	1	0	0	2	2	1	1	0	1	2	0	1	3	1	0	0	0	0	1	0	0	1	0	2	1	0	0	0	0	1	0	0	1	0	0	0	0	1	1	0	0	0	1	0
Otu00594	2	2	1	0	1	2	1	2	1	1	0	0	0	1	6	3	0	2	0	3	0	0	1	0	0	0	0	0	0	0	0	0	0	0	0	0	0	0	1	1	1	0	0	0	0	1	0	0	3
Otu00595	0	1	0	0	1	0	1	1	0	0	3	1	1	0	0	0	0	0	0	0	0	1	0	0	0	0	0	0	1	0	1	1	1	0	1	0	0	1	1	2	1	0	0	2	3	0	1	0	2
Otu00596	0	0	0	0	0	1	0	0	0	2	0	1	0	0	1	0	1	1	1	1	1	0	0	0	1	0	1	0	0	2	1	1	2	0	1	0	0	0	1	1	1	1	0	0	0	0	0	1	0
Otu00597	0	0	0	0	2	0	0	0	0	0	0	0	0	0	0	0	0	0	0	0	0	0	0	0	0	0	0	1	0	0	1	0	1	1	1	1	1	0	2	0	0	1	0	1	1	0	0	0	0
Otu00598	0	0	0	0	0	1	0	0	0	1	0	0	0	0	0	0	0	0	0	0	0	1	0	1	0	0	0	0	0	0	1	1	0	1	1	0	0	0	4	1	1	0	1	1	0	0	1	1	0
Otu00599	0	1	0	1	0	0	1	1	0	1	1	1	0	2	0	0	0	0	0	0	0	0	0	0	0	0	3	2	0	0	0	0	0	3	1	0	0	1	1	1	1	0	0	0	0	0	0	0	0
Otu00600	0	1	1	0	0	1	0	1	1	0	0	0	2	0	0	1	0	1	0	1	0	0	0	1	0	1	0	2	0	1	0	0	0	0	0	1	0	1	0	0	2	0	0	0	1	0	0	0	0
Otu00601	0	0	0	0	0	1	1	0	0	0	0	0	0	0	1	0	0	1	0	0	0	0	0	0	0	0	0	0	0	3	0	1	0	0	2	0	1	0	0	0	0	0	0	1	0	0	0	1	1
Otu00602	0	0	0	0	1	1	0	0	0	0	0	0	0	0	1	1	2	0	0	0	0	0	2	3	1	0	0	0	0	0	0	0	0	0	0	0	0	0	1	0	2	1	0	2	1	2	1	0	0
Otu00603	0	1	1	0	0	1	0	0	0	0	0	0	1	1	0	1	0	1	0	0	0	1	0	0	0	0	2	2	1	1	2	2	1	1	1	0	1	1	0	1	1	0	0	0	1	1	0	1	0
Otu00604	0	0	0	0	0	0	0	0	0	0	0	0	0	0	1	0	0	0	1	1	3	3	4	1	2	1	0	0	0	0	0	0	1	0	2	2	0	3	0	0	0	2	0	1	0	0	0	2	0
Otu00605	0	0	1	0	0	0	0	1	2	0	1	0	0	0	0	1	0	0	0	0	0	0	0	0	0	0	4	3	0	1	1	0	0	2	0	0	0	0	0	0	1	0	1	0	0	0	1	1	0
Otu00606	0	1	2	1	0	0	0	0	2	1	1	1	0	0	0	0	1	1	0	1	0	0	2	0	0	0	1	1	0	1	0	0	0	0	0	1	0	1	0	0	0	0	0	1	2	0	0	1	1
Otu00607	0	1	0	1	1	3	0	0	1	0	2	2	0	0	3	2	2	0	2	1	0	0	1	1	1	2	0	1	1	0	0	0	0	0	0	0	0	1	0	0	0	1	0	2	0	0	0	0	0
Otu00608	2	1	0	1	0	1	0	1	0	0	1	1	0	0	1	0	0	1	0	1	0	0	1	0	0	0	1	0	1	2	1	2	3	0	1	0	0	0	0	0	1	0	0	0	2	0	0	0	0
Otu00609	0	0	1	0	0	0	0	0	1	0	0	0	0	1	1	0	0	0	0	0	2	3	1	3	2	2	0	0	0	0	0	1	1	2	1	0	0	0	0	0	0	0	0	0	0	0	0	0	0
Otu00610	1	0	0	1	0	0	0	0	1	2	1	1	1	0	2	0	2	1	2	1	1	0	0	0	0	0	0	1	1	0	0	0	2	2	1	0	0	0	0	0	0	0	0	0	1	1	0	2	3
Otu00611	0	0	2	0	0	0	1	1	0	3	1	1	1	0	1	0	1	1	0	0	0	0	0	0	1	1	6	1	0	0	2	0	0	1	0	1	0	1	0	2	0	0	1	0	2	0	0	1	0
Otu00612	1	1	2	0	0	0	0	1	0	0	0	0	1	2	0	1	0	0	0	0	0	0	1	0	0	0	1	0	0	0	1	1	1	1	0	2	1	0	1	1	0	1	0	0	1	1	1	1	0
Otu00613	2	0	0	1	0	1	0	0	2	0	0	1	0	0	0	0	0	0	1	0	0	1	0	0	0	0	2	0	1	2	1	2	1	1	1	1	1	0	0	1	0	0	0	0	3	1	0	1	0
Otu00614	0	0	0	0	1	0	0	0	0	0	0	2	0	0	0	0	0	1	0	1	0	1	1	0	0	0	0	0	0	0	0	0	1	0	0	2	0	0	1	0	0	1	1	0	0	0	0	0	0
Otu00615	1	0	0	0	2	1	0	2	0	1	0	3	0	1	1	0	0	0	1	0	0	0	0	0	1	0	0	0	0	0	1	1	0	0	0	0	0	0	0	0	0	0	1	0	0	1	0	0	0
Otu00616	1	2	0	3	4	0	0	0	0	2	1	1	1	0	1	1	1	0	2	3	0	0	0	0	0	0	0	0	0	0	0	0	1	0	0	0	0	1	0	0	0	0	0	0	0	0	0	0	0
Otu00617	0	0	0	1	1	1	0	1	0	0	0	1	0	1	2	1	0	0	0	1	0	2	0	0	3	0	0	0	0	0	0	0	0	0	0	0	0	1	1	0	0	0	0	0	2	0	0	1	1
Otu00618	0	0	0	0	1	0	1	0	0	0	0	0	1	0	0	0	0	0	0	0	0	0	0	0	1	0	0	0	0	0	1	0	3	1	0	1	0	0	0	0	0	2	0	0	0	2	0	0	0
Otu00619	0	1	0	0	0	0	0	1	0	1	0	0	0	0	0	0	0	1	0	0	1	0	1	0	0	0	1	0	0	0	1	0	3	1	0	2	0	1	0	0	0	0	0	1	2	0	0	0	0
Otu00620	0	0	0	0	0	0	0	0	0	0	0	0	0	0	0	0	0	0	0	0	0	0	0	0	0	0	0	0	0	0	0	0	0	0	0	0	0	0	0	0	0	0	0	0	0	0	0	0	0
Otu00621	0	0	0	2	0	0	0	0	0	0	0	0	0	1	0	0	0	1	2	0	0	0	0	0	0	0	0	0	0	1	0	0	0	1	0	1	0	0	1	0	1	0	0	1	1	0	0	0	0
Otu00622	0	1	0	0	0	0	1	0	1	0	0	0	0	0	0	3	0	0	0	0	0	0	0	1	0	0	0	0	1	0	0	0	1	0	1	1	0	0	1	0	0	1	1	0	1	0	0	1	0
Otu00623	2	0	1	1	1	1	2	1	1	1	0	0	3	0	0	1	0	0	1	0	0	1	1	0	2	1	1	0	0	0	1	0	0	0	0	0	1	0	0	0	1	0	0	0	0	1	0	0	1
Otu00624	0	2	1	0	1	0	0	1	1	2	0	1	0	2	1	1	1	0	0	1	3	0	0	0	0	2	0	0	0	0	0	0	0	1	0	0	0	0	0	0	0	0	0	0	1	0	2	0	0
Otu00625	0	0	0	0	0	0	2	0	0	0	1	3	2	1	0	0	0	2	0	0	0	0	0	0	1	0	0	0	0	0	0	1	0	0	0	1	0	0	0	0	0	0	0	0	0	0	0	0	0
Otu00626	1	0	3	1	2	1	2	1	1	2	2	0	0	1	0	0	2	2	0	0	1	0	0	0	0	0	0	0	0	0	0	0	0	0	0	0	0	0	0	0	0	0	0	1	0	1	0	1	1
Otu00627	1	0	0	1	1	0	0	0	1	1	0	0	0	0	0	0	0	1	0	0	0	0	0	0	0	0	2	1	0	0	0	0	1	1	0	0	1	0	0	0	1	0	1	0	0	0	0	0	0
Otu00628	2	0	0	0	0	1	1	1	0	2	0	0	0	1	0	0	0	0	0	0	0	0	0	0	1	0	1	0	3	0	2	0	0	1	1	0	1	0	2	1	0	1	1	0	0	0	0	0	0
Otu00629	2	2	2	0	0	1	0	0	0	2	0	0	2	1	1	0	1	1	1	2	1	2	1	0	0	1	0	0	0	0	0	0	0	0	0	1	0	0	0	0	0	1	0	0	1	1	0	0	1
Otu00630	1	0	0	0	1	2	0	0	1	1	0	0	1	0	0	2	0	1	0	0	0	0	0	0	0	0	1	2	1	1	1	0	0	0	0	0	1	0	1	0	0	0	2	0	0	0	0	0	0
Otu00631	0	1	0	0	0	0	0	0	0	0	0	0	0	0	1	0	0	0	1	0	2	2	3	2	1	0	1	0	0	0	0	0	2	2	0	0	1	0	0	1	1	1	0	0	2	0	0	0	2
Otu00632	2	0	0	2	0	0	2	1	0	0	1	0	0	0	1	0	2	0	1	0	0	1	0	1	0	0	1	0	0	0	1	0	2	1	0	2	0	0	1	1	2	1	0	0	0	0	0	0	0
Otu00633	0	0	0	0	0	0	0	0	1	0	0	0	0	0	0	0	0	0	0	0	0	0	2	0	0	2	0	0	0	0	0	0	0	0	0	0	0	0	0	0	0	0	0	0	0	0	0	3	0
Otu00634	0	0	1	1	0	2	2	0	2	2	0	2	0	0	0	0	0	0	0	0	0	0	0	0	0	0	2	2	2	1	1	0	2	1	2	0	1	0	1	0	0	0	0	0	0	1	0	0	0
Otu00635	0	2	0	0	0	2	0	0	1	0	0	0	0	1	0	1	0	0	0	1	0	1	0	0	0	0	1	0	0	0	0	0	0	0	1	1	0	1	1	0	1	2	0	0	1	0	0	0	0
Otu00636	0	1	1	1	1	2	1	1	1	1	0	0	1	1	0	0	0	0	2	2	1	0	0	1	0	0	0	0	1	0	1	0	0	1	0	0	0	0	0	0	1	0	1	0	2	0	0	0	0
Otu00637	1	0	0	1	0	0	1	1	2	1	2	0	1	0	0	1	0	0	0	0	2	1	1	1	1	0	0	0	0	0	0	0	0	0	0	0	0	1	1	1	0	2	1	1	0	0	1	0	3
Otu00638	0	0	0	0	0	0	0	0	0	1	0	0	0	0	0	0	1	0	0	0	3	0	1	1	1	0	0	0	0	0	0	0	0	0	0	1	1	1	0	0	0	0	0	0	1	0	0	1	0
Otu00639	1	0	0	0	0	2	0	0	0	1	0	0	1	0	1	1	1	0	0	3	1	0	0	1	0	0	0	0	1	0	0	0	1	1	0	0	0	2	0	0	1	0	4	0	0	3	0	1	0
Otu00640	0	0	0	0	0	0	0	0	0	0	0	0	0	0	0	0	0	0	0	0	0	0	0	0	0	0	0	0	0	0	0	0	0	0	0	0	0	0	0	0	0	0	0	1	0	0	0	0	0
Otu00641	0	0	0	0	1	0	0	0	0	0	2	1	0	0	0	0	0	0	0	0	0	0	0	0	0	0	0	0	0	0	1	0	0	1	1	1	0	0	0	0	0	0	0	1	0	0	0	0	0
Otu00642	0	1	0	1	0	0	0	0	1	0	0	0	0	0	1	1	2	0	0	1	2	2	1	0	0	2	0	0	0	0	0	0	0	1	0	0	0	0	0	1	0	1	0	1	0	0	0	2	2
Otu00643	3	0	2	3	1	0	2	1	0	1	3	1	0	0	0	1	2	3	1	5	0	0	0	0	1	1	1	0	0	1	0	0	0	0	0	1	0	1	0	0	0	0	0	0	0	0	1	0	0
Otu00644	0	0	1	0	1	1	0	2	0	0	0	0	0	0	1	2	0	0	1	0	0	0	0	1	0	0	0	0	0	0	1	0	1	0	0	2	0	0	1	0	0	0	0	0	0	0	0	0	0
Otu00645	0	0	0	0	1	0	1	0	0	2	0	1	1	0	0	1	0	0	1	0	0	1	1	0	1	1	1	1	0	1	1	1	0	0	0	1	0	1	0	1	0	0	0	0	0	1	1	1	2
Otu00646	0	0	2	1	1	0	1	1	0	1	0	0	0	0	1	1	0	0	0	0	1	0	0	0	0	0	2	2	1	1	2	2	0	1	1	0	2	3	1	0	0	0	0	0	0	0	0	0	0
Otu00647	1	0	0	1	0	0	2	1	1	1	0	0	0	1	0	0	0	0	0	0	0	1	0	0	0	0	1	2	0	0	3	5	2	4	1	1	0	0	0	0	0	0	0	1	1	0	1	0	0
Otu00648	0	0	0	0	0	0	0	1	0	0	0	2	0	0	0	1	1	1	2	1	0	0	0	0	0	2	1	1	0	0	0	1	0	0	0	0	0	1	0	0	1	0	0	0	0	0	0	0	1
Otu00649	0	0	0	0	1	0	0	0	0	1	0	0	1	0	2	0	0	0	0	0	1	0	0	0	0	0	0	0	0	1	0	1	0	0	0	0	0	1	0	0	0	0	1	1	0	0	0	0	0
Otu00650	0	1	0	2	0	3	1	0	0	1	0	1	0	0	0	1	0	0	0	1	0	0	0	0	0	1	2	0	1	1	0	1	1	1	0	1	0	0	1	1	0	0	0	0	1	0	2	1	0
Otu00651	0	1	1	0	0	0	0	0	0	1	0	1	0	2	0	1	2	1	0	0	0	0	0	2	0	0	0	1	0	0	0	0	0	1	0	0	0	0	1	0	0	2	0	1	1	0	1	1	1
Otu00652	0	0	0	0	0	0	0	0	0	0	0	0	0	0	0	0	0	0	0	0	1	1	1	3	0	1	0	0	0	0	0	0	0	0	0	1	1	1	0	0	0	0	0	0	1	0	3	1	1
Otu00653	0	0	0	0	0	0	0	0	0	0	0	0	0	0	0	0	0	0	0	0	1	1	0	2	3	0	1	0	0	0	0	0	2	0	1	0	1	0	1	0	0	0	3	0	0	2	0	0	1
Otu00654	1	0	0	0	1	1	0	1	0	0	0	0	0	0	1	0	2	0	1	1	1	0	0	0	1	0	0	0	1	0	0	0	1	0	0	0	0	0	0	0	0	0	0	0	1	0	1	0	0
Otu00655	0	0	0	0	0	0	0	0	0	0	0	1	0	1	1	0	0	1	0	0	0	1	0	2	0	0	0	0	0	0	0	0	0	0	0	0	0	0	0	0	0	1	0	1	2	2	0	0	0
Otu00656	0	1	2	1	1	3	0	1	0	2	3	3	1	3	0	0	0	1	0	0	1	0	0	0	0	0	1	1	0	1	0	0	0	1	0	0	0	0	0	0	0	2	1	1	0	0	1	0	0
Otu00657	1	0	1	1	3	1	1	0	0	0	0	0	0	1	1	0	1	2	2	0	0	1	0	0	0	0	0	0	0	0	0	0	0	0	0	0	0	0	1	0	0	1	1	0	0	2	0	2	1
Otu00658	0	0	1	1	1	0	2	0	1	1	0	1	0	1	2	0	1	1	1	0	0	0	2	0	1	1	0	1	0	0	0	0	0	0	0	3	0	0	0	0	0	1	1	1	0	0	0	1	1
Otu00659	0	1	0	2	0	2	0	2	0	1	0	0	1	0	0	1	0	0	1	1	1	0	1	0	0	0	0	0	0	0	1	1	1	1	0	0	1	1	0	0	0	0	0	0	1	0	1	0	0
Otu00660	0	0	0	0	0	0	0	0	0	0	0	0	0	0	0	0	0	0	0	0	3	5	1	4	1	6	0	0	0	0	0	0	0	0	0	0	0	0	0	0	0	1	0	0	2	0	0	1	1
Otu00661	2	2	2	0	3	1	2	0	3	0	0	0	1	0	2	3	1	3	1	0	0	0	0	0	1	1	0	0	0	0	1	0	1	0	0	0	0	0	0	0	0	0	0	0	0	1	1	0	0
Otu00662	0	0	0	0	0	0	0	0	1	1	0	0	1	0	0	0	1	1	1	0	0	0	0	1	0	1	0	0	0	0	0	0	0	0	0	1	0	1	3	0	2	1	1	0	0	0	0	0	4
Otu00663	0	0	1	2	0	0	0	0	0	0	2	1	2	0	1	0	0	0	1	0	3	1	0	0	0	0	0	1	0	2	0	0	2	0	0	0	0	1	0	2	1	1	0	1	0	1	0	0	0
Otu00664	0	0	0	0	0	0	0	0	1	0	0	0	1	0	0	0	0	0	0	0	0	0	0	0	0	1	2	0	0	1	0	0	0	0	1	1	0	0	0	0	1	0	2	2	1	0	1	0	0
Otu00665	1	1	1	4	3	0	0	0	0	6	2	1	3	1	0	0	0	1	0	1	0	0	0	0	0	0	1	1	0	0	0	0	0	0	1	0	0	0	0	0	2	0	0	0	0	0	0	0	0
Otu00666	0	0	0	1	1	2	2	0	0	0	1	1	0	0	1	0	0	1	0	1	0	0	2	2	1	0	0	0	0	0	0	0	0	0	0	0	1	0	1	0	0	0	0	0	0	0	1	0	0
Otu00667	0	0	0	0	0	0	1	0	3	0	1	0	0	0	1	1	0	0	0	2	0	2	0	0	0	1	1	0	0	0	0	1	1	0	0	0	1	1	1	0	0	0	0	0	0	1	0	1	2
Otu00668	0	1	0	0	0	1	1	1	0	1	0	0	1	1	0	0	0	0	0	0	0	0	0	0	0	0	1	1	1	3	0	3	1	1	1	0	1	0	1	1	0	2	0	0	0	0	0	0	0
Otu00669	0	0	0	1	1	1	2	1	1	3	2	0	0	1	0	1	0	0	0	1	0	0	0	1	0	0	1	0	0	1	0	0	0	0	0	2	1	1	0	1	0	0	2	1	0	1	1	1	0
Otu00670	2	0	2	3	0	0	2	2	2	7	1	1	0	0	0	0	1	0	1	0	0	0	0	0	0	0	0	0	1	0	0	0	0	0	1	0	0	1	1	0	1	0	0	0	0	0	0	0	0
Otu00671	1	2	2	0	0	2	0	2	1	1	1	0	0	0	0	0	1	0	0	2	0	0	0	0	0	0	0	0	0	2	0	0	0	1	2	0	1	1	0	0	0	0	1	1	0	0	1	0	1
Otu00672	0	0	1	0	0	0	0	0	0	1	0	0	1	0	0	0	0	0	0	1	0	1	0	0	1	1	0	0	0	0	1	0	0	0	0	0	1	0	2	1	0	0	0	0	0	0	0	0	0
Otu00673	0	0	0	0	0	0	0	0	0	0	1	0	0	0	0	0	0	0	0	0	1	0	0	0	2	0	0	0	0	0	0	0	0	0	0	0	0	0	0	0	0	0	0	0	0	0	0	0	0
Otu00674	0	0	1	2	1	2	0	2	0	0	0	1	1	2	0	2	1	0	1	0	0	0	1	0	0	1	0	0	0	2	1	0	1	1	0	0	0	0	0	0	1	0	0	0	0	1	0	0	0
Otu00675	1	2	0	1	1	0	1	1	0	1	1	2	0	0	2	1	2	2	2	1	0	2	0	1	0	0	0	0	0	0	0	1	0	0	0	0	1	0	0	1	0	2	0	1	0	0	0	0	0
Otu00676	0	1	0	0	0	1	0	0	0	0	1	0	0	0	0	0	0	0	0	0	0	0	1	0	0	0	0	1	0	0	0	0	0	0	0	1	0	0	2	0	0	0	0	0	0	0	0	0	1
Otu00677	0	0	0	0	0	0	0	0	1	1	0	1	1	0	0	0	0	0	0	1	0	0	1	0	0	2	0	0	4	0	0	0	1	0	2	2	1	0	0	0	0	0	1	0	0	0	0	0	1
Otu00678	0	0	0	0	1	1	2	0	0	1	0	0	0	0	0	0	0	0	1	0	0	0	0	0	0	0	2	1	1	2	1	2	2	0	0	1	0	1	1	0	0	0	1	0	0	0	0	0	0
Otu00679	1	0	0	0	0	1	0	0	1	0	0	1	0	0	0	1	1	1	0	1	1	0	0	0	0	1	0	0	0	0	0	0	0	0	0	1	0	0	1	1	1	2	0	2	0	0	1	0	1
Otu00680	0	0	0	0	1	0	0	0	0	0	0	0	0	0	0	1	0	0	0	0	0	0	0	0	0	0	0	0	0	0	0	0	0	0	0	0	0	0	0	0	2	1	2	0	0	0	0	0	0
Otu00681	0	0	2	1	0	0	1	0	1	0	1	0	0	1	0	0	1	2	1	1	0	0	0	0	0	0	0	0	0	1	0	0	0	0	0	1	0	0	0	1	0	0	0	0	0	2	0	0	0
Otu00682	0	0	2	0	0	2	0	0	0	0	4	1	0	0	0	0	0	0	0	1	0	0	0	0	0	0	1	1	1	2	0	0	1	1	0	0	0	0	1	0	0	0	0	0	0	0	0	0	1
Otu00683	0	0	0	0	0	0	0	0	0	0	0	0	0	0	0	0	0	1	0	0	0	0	0	0	0	0	1	0	1	0	2	0	0	1	1	0	0	0	1	0	0	0	0	0	0	1	0	0	1
Otu00684	0	0	0	0	1	0	0	0	0	1	1	0	1	0	1	0	0	0	0	1	0	0	0	0	0	0	2	1	1	1	1	1	2	4	0	0	2	0	1	1	0	0	0	1	0	0	0	0	0
Otu00685	0	0	0	1	0	1	1	1	2	1	0	2	1	1	0	0	0	1	2	1	0	1	2	1	1	1	0	0	0	0	0	0	0	0	0	0	0	0	0	0	0	0	0	1	0	0	0	0	0
Otu00686	0	0	0	1	1	0	3	0	0	0	0	0	0	0	0	0	1	0	2	0	0	0	0	0	0	1	1	0	2	0	2	0	0	1	0	0	0	0	0	1	0	0	0	0	0	0	0	0	0
Otu00687	1	0	0	1	0	0	0	0	0	1	2	1	1	0	0	2	0	0	0	1	0	0	0	0	0	0	1	1	2	0	1	1	3	0	2	2	0	2	0	0	1	0	0	0	0	0	0	1	0
Otu00688	0	0	0	0	0	0	1	0	1	0	0	0	0	0	0	1	0	0	0	0	0	0	1	2	2	0	0	0	0	0	0	0	1	0	0	2	1	0	0	0	0	0	1	0	0	0	0	0	2
Otu00689	0	4	0	0	1	0	1	0	0	1	0	0	1	2	1	0	2	0	0	0	0	1	0	0	0	0	0	2	2	0	2	2	1	1	1	0	0	1	0	0	0	0	0	1	0	0	2	0	1
Otu00690	2	1	0	2	0	1	0	0	1	0	0	1	0	0	0	2	2	1	0	0	0	0	1	0	0	0	0	0	1	0	0	0	2	0	1	0	1	1	0	1	0	0	1	0	0	0	1	0	1
Otu00691	0	0	0	0	0	0	0	0	0	0	0	0	0	0	0	0	0	0	0	0	0	1	2	0	0	2	0	0	0	0	0	0	0	0	0	0	0	1	0	0	0	0	0	0	1	0	0	0	3
Otu00692	0	1	0	0	0	0	0	2	0	0	1	0	0	0	0	0	0	0	0	0	0	0	1	0	0	0	1	0	0	1	0	0	0	1	1	0	0	0	0	0	0	0	0	1	0	1	1	1	0
Otu00693	0	1	0	0	0	0	1	0	2	0	0	0	2	1	0	0	0	0	1	0	0	0	1	0	1	0	1	1	0	0	0	0	0	0	0	0	0	0	0	0	0	1	0	0	1	0	0	2	0
Otu00694	0	0	1	2	0	0	2	1	0	1	1	1	2	1	0	0	0	1	0	0	0	0	0	0	0	0	2	0	1	0	3	0	0	3	1	1	0	0	0	0	0	0	1	1	2	0	0	0	0
Otu00695	0	0	0	0	0	0	0	0	0	0	0	0	0	0	0	0	0	0	0	0	0	0	0	0	0	0	0	0	0	0	0	0	0	0	0	0	0	1	0	0	0	0	0	0	1	2	4	1	1
Otu00696	0	0	0	0	1	1	0	1	0	0	1	0	1	0	0	0	1	0	1	1	0	0	0	0	0	1	0	1	2	1	0	0	0	0	1	0	0	0	0	0	0	0	1	0	1	1	0	0	0
Otu00697	0	0	0	0	1	1	0	0	0	0	0	0	0	0	0	0	1	1	0	0	0	0	3	0	0	0	0	0	0	0	0	0	0	1	0	0	0	0	0	0	0	1	0	0	1	0	0	1	0
Otu00698	1	0	3	2	1	1	0	0	0	0	0	0	0	0	0	0	0	0	0	0	0	0	0	0	0	1	0	0	0	0	0	0	0	0	1	0	0	1	0	0	0	1	0	0	2	0	0	1	0
Otu00699	0	0	1	0	0	0	1	0	0	0	0	0	0	0	0	0	0	0	0	0	1	2	0	1	1	0	0	0	0	1	0	0	0	2	2	0	0	0	0	0	0	0	0	0	0	1	1	1	0
Otu00700	0	0	0	0	0	0	0	0	0	0	0	0	0	0	0	0	0	0	0	0	1	1	1	1	3	2	0	0	0	0	0	0	0	1	0	1	1	0	0	0	0	1	0	0	2	0	0	0	3
Otu00701	0	0	1	0	0	0	0	0	2	0	1	0	0	2	0	0	2	0	0	0	0	1	1	1	0	1	0	0	0	1	0	1	0	0	1	0	1	0	1	0	1	1	0	1	2	0	0	1	0
Otu00702	1	0	0	1	0	0	0	0	0	2	1	1	2	0	0	1	0	2	0	0	0	0	0	0	0	0	1	2	2	0	1	0	0	0	0	0	0	0	0	0	0	0	0	2	0	0	0	1	1
Otu00703	0	0	0	0	0	0	0	1	0	0	1	0	1	1	0	0	0	0	0	0	0	0	0	0	0	0	1	1	1	1	1	1	0	1	0	0	0	0	0	0	0	1	0	0	0	0	0	0	0
Otu00704	0	1	0	1	1	0	0	0	0	0	0	0	1	1	0	1	2	0	1	3	2	0	1	1	1	0	0	0	0	1	0	0	1	1	0	0	0	0	0	0	0	1	0	0	0	0	0	0	1
Otu00705	3	2	0	2	0	1	2	1	2	0	1	0	2	1	2	1	2	0	1	0	0	0	0	0	1	1	0	0	0	0	0	0	0	0	0	0	0	0	0	0	0	0	0	1	0	0	0	0	0
Otu00706	0	0	1	0	0	0	0	1	1	0	0	0	0	0	0	1	0	0	0	0	0	1	2	1	0	0	0	0	0	0	0	0	0	0	0	1	1	0	0	0	0	0	0	0	0	0	0	2	0
Otu00707	1	0	0	0	0	1	0	1	1	0	1	0	1	1	0	1	2	0	0	1	0	0	0	0	0	0	3	1	0	1	1	2	1	0	0	1	0	1	0	0	0	0	0	0	1	0	0	0	0
Otu00708	0	1	2	0	0	0	0	0	2	0	2	0	0	2	0	1	0	2	1	0	0	1	1	1	0	0	0	0	0	0	0	0	0	0	0	0	0	0	1	0	0	0	2	0	0	0	0	0	0
Otu00709	0	1	2	0	0	1	0	0	0	3	0	0	1	0	0	0	1	0	0	0	0	0	0	0	0	0	1	2	0	4	0	1	1	0	2	0	0	0	0	0	1	0	0	0	0	0	0	1	0
Otu00710	1	1	1	1	0	1	1	0	1	3	3	3	1	1	0	0	0	0	0	0	0	0	0	0	0	0	0	0	0	0	1	0	1	0	1	0	1	0	0	0	0	0	0	0	0	0	0	0	0
Otu00711	1	1	0	0	0	0	0	0	2	2	0	0	2	1	0	0	0	1	0	0	0	0	0	0	0	1	0	0	0	0	0	0	0	0	0	2	2	0	0	0	0	0	0	0	0	0	1	1	2
Otu00712	0	0	0	0	0	0	0	0	0	0	0	0	0	0	0	0	0	0	0	0	0	1	0	0	1	0	0	0	0	0	0	0	0	0	0	0	0	0	1	1	2	0	1	1	0	0	0	0	0
Otu00713	0	0	0	1	0	0	0	0	1	1	1	0	2	0	0	1	1	0	0	0	0	0	0	0	0	0	0	0	0	1	0	0	1	1	1	0	0	0	0	0	0	0	0	0	0	0	1	0	0
Otu00714	0	0	1	1	1	2	0	0	0	1	0	2	0	0	3	0	1	1	0	0	0	0	0	0	0	1	0	0	1	0	0	0	0	0	0	0	0	0	0	1	1	1	0	0	2	1	0	0	1
Otu00715	0	0	1	1	1	0	0	1	0	0	0	1	0	1	1	0	0	0	0	1	0	0	0	0	0	0	0	0	2	1	0	2	0	0	0	0	1	1	1	0	0	2	1	0	0	0	0	0	0
Otu00716	0	0	0	0	0	0	0	0	0	0	0	0	0	0	0	0	0	3	1	0	0	0	2	0	0	0	0	0	0	0	0	0	0	1	0	0	0	1	0	0	1	0	1	0	1	0	2	0	0
Otu00717	1	1	0	3	0	0	0	1	0	2	0	1	1	1	0	4	1	1	1	1	0	0	1	1	0	1	0	0	0	0	0	0	0	0	0	1	1	1	1	0	0	0	0	0	0	0	0	0	1
Otu00718	0	1	1	0	0	0	0	0	3	3	0	1	0	0	0	0	1	1	0	0	0	1	0	0	0	0	0	0	2	0	0	0	0	2	0	0	0	0	1	0	0	0	0	0	1	0	0	1	0
Otu00719	2	0	1	0	1	0	1	0	1	0	0	1	1	1	1	0	0	0	1	1	0	0	0	0	0	0	0	1	2	0	0	1	0	0	1	0	0	0	0	0	0	1	1	1	1	0	1	0	0
Otu00720	0	0	0	0	1	0	0	0	0	0	0	1	1	0	0	0	0	0	0	0	0	0	0	0	0	0	1	4	1	2	1	0	1	2	1	0	2	0	0	2	1	0	1	0	0	0	0	0	0
Otu00721	0	1	0	0	1	0	1	1	0	1	0	1	1	0	0	0	0	1	1	0	0	0	0	0	2	0	0	0	0	0	0	0	1	0	0	1	0	0	0	0	0	0	0	1	0	1	1	0	0
Otu00722	0	0	0	2	0	0	0	1	0	0	0	0	1	1	1	2	1	0	2	0	0	0	0	1	2	2	0	0	1	0	0	0	0	0	1	0	1	0	0	0	0	0	1	0	0	0	0	0	0
Otu00723	1	2	0	1	0	0	0	1	0	1	1	1	2	0	0	0	0	0	0	0	0	0	0	0	1	0	1	2	0	2	0	1	0	1	2	0	1	0	0	2	0	1	0	0	0	0	0	0	0
Otu00724	0	0	0	1	0	1	0	0	0	1	2	2	0	4	1	1	0	2	0	1	1	0	0	0	1	0	0	1	1	1	0	1	0	1	0	0	0	0	2	0	0	0	0	0	0	0	1	0	0
Otu00725	1	0	0	0	0	0	0	2	0	0	0	0	0	1	0	1	0	0	1	0	0	0	1	1	0	0	0	2	2	0	0	0	0	0	0	0	0	0	0	0	0	1	0	1	0	0	0	0	1
Otu00726	0	1	1	0	1	0	2	3	0	0	0	0	2	2	2	2	1	0	1	0	0	1	1	1	1	0	0	1	0	0	0	0	0	0	0	0	0	0	0	0	1	0	0	0	1	0	1	0	2
Otu00727	0	0	0	0	0	0	0	0	0	0	0	1	0	1	1	0	0	0	2	0	0	0	0	0	0	0	0	0	0	0	2	0	1	1	0	1	0	1	0	0	0	0	0	0	0	0	0	0	2
Otu00728	0	1	0	0	1	0	0	0	0	0	1	0	1	1	1	0	0	0	0	0	0	0	0	0	0	0	2	1	2	0	1	0	0	0	0	0	0	0	1	0	1	0	3	0	0	0	0	1	0
Otu00729	0	0	0	0	4	0	1	1	0	4	0	0	0	0	0	0	0	1	0	0	0	0	0	0	0	0	1	0	2	0	0	0	1	0	1	0	0	0	1	0	0	0	1	1	0	1	0	1	0
Otu00730	0	1	1	0	0	0	0	0	0	1	2	0	1	0	0	0	0	0	0	0	0	0	1	1	0	0	0	0	0	0	1	0	0	0	0	0	0	0	0	0	0	0	0	0	1	0	0	0	0
Otu00731	1	1	0	0	0	0	0	1	0	1	2	1	0	1	2	2	0	2	0	0	0	0	0	0	0	0	1	0	0	0	0	1	0	1	1	1	0	1	0	0	0	0	0	1	0	0	0	0	0
Otu00732	1	0	0	0	0	0	1	0	0	1	0	1	0	0	0	0	0	1	0	0	0	1	1	0	0	0	0	0	1	0	0	0	0	0	0	0	3	1	0	1	1	0	0	0	0	0	2	1	1
Otu00733	0	1	0	1	0	0	0	0	0	0	0	0	0	0	0	2	1	0	0	0	0	0	0	0	0	0	0	0	0	0	0	0	0	0	0	0	0	0	0	0	0	0	0	0	0	0	0	0	0
Otu00734	1	0	0	1	0	0	0	0	0	0	0	0	0	0	0	0	2	0	0	1	0	0	1	0	0	1	1	0	0	1	0	0	0	0	0	0	1	0	0	0	0	0	1	0	0	1	0	0	1
Otu00735	0	0	0	0	0	0	0	0	0	1	0	0	1	0	0	1	0	0	0	0	0	0	0	0	0	0	0	0	1	1	0	0	1	0	0	1	0	1	0	0	0	2	0	1	0	0	0	0	0
Otu00736	0	0	0	0	0	0	0	0	0	0	0	0	0	0	0	0	0	0	0	0	1	0	0	1	0	0	0	0	0	1	1	2	1	0	1	0	0	0	0	1	0	0	0	1	0	0	0	0	0
Otu00737	3	0	0	0	2	0	1	0	0	2	1	0	1	0	0	0	1	0	0	0	2	0	2	0	1	0	0	0	0	1	0	0	0	0	0	0	2	0	0	0	0	0	1	0	1	0	0	1	0
Otu00738	0	0	0	0	1	0	0	0	1	0	0	1	1	0	0	1	0	0	0	0	0	2	0	0	1	0	0	1	0	0	0	0	0	0	0	1	0	0	0	2	0	0	1	1	1	1	0	0	1
Otu00739	0	0	0	0	1	0	1	0	0	0	0	0	0	0	1	0	0	0	0	0	0	0	0	0	0	0	0	0	0	1	2	0	0	1	0	0	0	0	0	0	0	0	0	0	0	0	0	0	0
Otu00740	1	3	0	0	0	2	2	0	0	0	0	1	0	2	0	0	0	0	0	0	0	0	0	1	0	0	2	0	0	1	0	0	0	0	0	0	0	0	1	0	0	0	1	0	0	1	0	0	0
Otu00741	0	1	1	1	0	0	1	0	1	0	0	0	0	1	0	0	0	0	0	0	0	0	2	0	0	1	3	0	0	1	0	2	0	0	2	0	0	0	0	0	1	0	0	0	0	0	1	0	0
Otu00742	2	1	0	3	0	1	0	2	3	2	0	1	3	0	0	0	0	0	1	1	0	1	0	0	1	0	0	0	0	0	0	0	0	0	0	0	0	0	0	0	0	0	0	0	0	0	0	1	0
Otu00743	0	0	0	0	0	0	0	0	0	0	0	0	0	0	0	0	0	0	0	0	0	0	0	0	0	0	0	0	0	0	0	0	0	0	0	0	0	0	1	0	1	0	1	1	1	1	0	2	0
Otu00744	0	0	0	0	0	0	0	1	0	0	0	0	0	0	0	0	0	0	1	0	1	0	0	1	0	0	0	0	0	0	0	0	0	2	0	0	1	1	0	0	1	1	0	0	1	0	0	1	1
Otu00745	1	0	0	1	0	0	2	1	0	1	0	0	1	1	1	0	1	1	1	0	1	0	0	0	0	0	0	0	0	0	0	0	1	0	0	0	0	0	0	0	0	0	0	0	0	0	0	1	0
Otu00746	1	0	0	2	1	2	1	0	0	0	0	1	1	0	0	0	0	0	0	0	0	0	0	0	0	0	1	1	0	0	2	1	1	0	0	0	1	0	1	0	1	0	0	0	0	0	1	0	0
Otu00747	0	0	0	0	0	0	0	0	0	0	0	0	0	0	1	0	0	0	0	0	1	2	0	1	1	0	0	0	0	1	0	0	0	0	1	0	0	0	0	1	0	1	0	0	0	0	0	0	0
Otu00748	1	0	0	1	1	1	0	2	0	0	0	0	1	1	0	1	1	0	0	2	0	1	3	0	0	0	0	0	0	1	0	1	2	0	1	1	0	0	0	0	1	0	0	0	0	0	0	0	0
Otu00749	1	1	0	0	1	0	0	1	0	1	1	0	0	0	1	1	0	1	1	0	0	0	0	0	0	0	0	0	1	0	0	0	1	2	0	0	1	0	1	1	0	0	0	0	1	0	1	0	1
Otu00750	0	0	0	0	0	0	0	2	0	0	0	0	0	0	1	0	1	1	2	2	0	1	0	0	0	0	0	1	0	0	0	0	0	1	1	0	0	0	0	2	1	0	0	0	1	3	0	1	0
Otu00751	0	0	1	0	0	0	0	1	1	0	0	0	0	0	0	0	0	1	0	0	0	0	0	0	0	0	1	2	0	2	1	1	1	0	2	2	0	0	0	0	0	2	0	0	0	1	0	0	0
Otu00752	2	3	0	0	1	1	0	0	1	0	0	1	2	1	0	3	1	0	1	2	0	2	0	0	0	0	0	0	0	0	0	0	1	0	0	0	0	0	0	0	1	0	0	0	0	0	0	0	0
Otu00753	0	0	0	0	2	0	0	0	0	1	0	0	0	0	0	0	0	0	1	0	0	0	0	0	0	0	0	0	0	0	0	0	0	0	0	0	0	1	1	2	3	2	1	2	1	1	1	1	0
Otu00754	2	0	0	1	0	0	0	0	0	0	0	0	0	1	1	0	0	1	0	0	0	0	0	0	0	0	0	0	1	0	0	1	0	2	0	0	0	0	0	1	0	0	0	1	0	0	0	1	0
Otu00755	0	0	0	0	0	0	0	0	0	0	0	0	0	1	0	0	0	0	1	0	0	0	0	1	1	0	0	0	0	1	3	0	0	0	0	0	0	0	0	0	1	0	1	0	0	0	0	0	0
Otu00756	1	1	0	0	0	0	0	1	0	0	0	0	0	0	0	0	1	1	0	0	1	0	2	1	2	2	0	0	0	0	0	0	0	0	1	0	0	1	0	0	0	0	0	0	0	2	0	3	0
Otu00757	0	0	0	0	0	0	0	0	1	0	0	0	0	0	0	0	0	0	1	0	0	0	0	0	0	0	0	0	0	1	0	1	0	1	1	1	1	0	1	0	0	0	0	0	0	0	1	0	1
Otu00758	1	1	1	0	0	0	3	1	0	0	2	0	0	1	0	1	0	0	0	0	1	0	0	0	0	0	0	0	0	0	2	0	0	2	0	0	0	2	0	0	0	0	0	0	0	0	1	0	0
Otu00759	0	1	1	2	0	2	0	1	1	0	0	0	1	1	1	0	1	1	0	0	0	2	0	0	0	0	0	0	0	0	0	0	0	0	0	0	0	0	0	1	0	0	2	0	0	0	0	0	1
Otu00760	1	1	1	0	0	0	1	2	1	0	2	1	0	0	1	0	1	1	1	2	0	0	0	0	0	1	0	0	0	0	0	0	1	0	0	1	0	1	1	1	0	0	0	0	0	0	1	0	1
Otu00761	0	1	0	1	1	0	0	0	0	1	0	1	1	0	0	0	1	0	0	0	1	0	1	0	0	0	0	0	0	0	0	1	1	0	0	0	0	0	1	0	0	1	1	0	0	1	0	0	0
Otu00762	0	0	1	1	0	0	0	0	0	1	1	0	0	1	0	1	0	1	0	0	0	1	0	0	0	0	0	0	0	0	0	1	0	0	0	0	1	2	0	0	0	0	0	0	0	0	0	2	0
Otu00763	0	0	1	0	1	0	0	0	0	1	0	0	0	2	0	0	1	0	1	0	0	0	0	0	0	0	1	0	1	0	0	0	3	0	3	0	1	0	0	0	0	0	0	1	0	0	0	0	0
Otu00764	1	0	2	1	1	1	0	0	0	1	1	1	1	0	2	1	1	0	0	1	0	0	0	0	0	0	1	0	0	0	0	1	1	0	1	0	0	0	0	0	1	0	0	0	0	0	0	1	0
Otu00765	0	1	1	3	1	0	0	0	0	0	2	1	2	0	0	2	0	4	1	0	0	0	0	1	2	0	0	0	0	0	0	0	0	0	0	0	0	0	0	0	0	1	0	0	0	0	0	0	0
Otu00766	0	1	1	0	0	2	1	1	0	0	0	0	1	1	2	0	3	1	0	0	1	0	1	0	0	0	0	0	0	0	0	0	0	0	0	0	0	0	0	0	0	0	3	0	0	1	1	0	0
Otu00767	1	0	0	0	0	0	1	0	0	0	0	0	0	0	1	0	0	1	1	0	0	1	0	0	1	1	1	1	0	1	0	0	0	0	0	0	0	0	0	0	0	0	0	0	0	0	0	0	0
Otu00768	0	0	0	0	0	0	0	0	1	0	0	0	0	0	0	1	0	1	0	0	2	0	1	0	0	0	0	0	0	0	3	0	2	2	1	1	1	0	2	0	0	0	0	1	0	0	0	1	0
Otu00769	0	0	0	1	1	0	1	1	1	1	0	0	0	0	0	0	0	0	0	0	0	0	0	0	0	0	0	0	0	0	0	0	0	0	0	0	0	0	0	0	0	0	0	1	0	0	0	0	0
Otu00770	0	0	0	0	0	0	0	1	1	0	0	1	0	0	0	1	0	0	0	1	0	1	0	1	2	0	0	1	0	1	0	0	0	0	0	0	1	0	0	1	1	1	0	0	1	1	1	2	0
Otu00771	0	1	0	1	1	0	0	1	0	0	0	0	0	0	0	0	0	0	0	0	0	0	0	0	1	0	1	0	0	1	1	0	0	0	0	0	1	2	1	0	0	0	1	0	0	0	0	0	0
Otu00772	0	0	0	0	1	0	0	0	0	0	2	1	0	1	0	0	0	1	0	1	0	0	0	0	0	0	0	0	2	0	0	0	0	0	1	0	0	1	1	1	0	0	0	0	2	1	4	0	0
Otu00773	0	3	1	0	0	2	1	0	0	0	0	0	0	0	0	0	0	1	0	0	0	0	0	1	1	0	0	0	0	0	0	0	0	0	0	0	1	0	1	0	1	0	0	0	0	1	1	0	1
Otu00774	0	1	0	1	2	0	1	0	0	0	0	0	0	0	0	1	1	2	1	1	0	1	0	0	0	0	0	0	0	0	0	0	0	0	0	0	0	0	1	1	0	1	1	2	2	0	0	0	1
Otu00775	0	0	0	2	1	2	0	0	2	2	1	3	1	2	0	1	0	0	0	0	0	1	0	0	0	0	0	0	0	0	0	1	0	0	0	0	0	0	0	1	0	0	0	0	0	0	0	0	0
Otu00776	3	0	0	1	1	0	1	2	0	1	1	1	1	0	0	1	0	0	0	0	0	0	0	0	1	0	0	0	0	0	0	0	2	0	0	0	0	0	0	2	0	1	1	0	0	1	0	0	0
Otu00777	0	0	0	0	1	0	0	0	0	0	0	0	0	0	0	0	0	0	0	0	0	0	0	0	0	0	0	0	0	0	0	0	0	0	0	0	1	1	0	1	0	0	0	0	0	0	0	0	0
Otu00778	1	0	0	0	0	0	0	0	0	1	1	0	0	0	1	1	0	1	0	0	0	0	1	0	0	0	0	1	0	0	1	1	1	1	1	1	2	0	0	0	0	2	1	0	0	0	0	0	0
Otu00779	0	0	1	0	0	0	0	1	1	0	0	1	0	0	0	0	0	0	0	0	0	0	1	0	1	0	1	0	1	0	1	1	0	0	0	0	0	0	0	0	0	0	0	0	0	0	0	0	0
Otu00780	2	1	0	0	0	0	0	0	2	0	0	0	0	0	0	1	0	0	0	1	0	0	0	0	1	0	0	0	0	1	1	0	0	0	0	0	0	0	2	1	0	0	1	1	0	0	0	0	0
Otu00781	1	1	2	0	0	3	0	0	0	0	2	2	0	1	0	0	0	0	0	1	0	0	0	0	0	0	0	0	1	0	0	0	1	0	0	0	1	0	0	0	0	0	0	1	1	0	0	0	0
Otu00782	0	0	0	0	0	1	0	1	0	0	0	0	1	1	3	1	0	1	0	0	0	0	2	1	0	0	0	0	0	0	0	0	0	0	0	0	0	0	0	0	1	0	1	1	0	0	0	1	1
Otu00783	0	1	1	2	1	1	1	0	1	0	4	0	0	0	0	0	0	0	1	0	0	0	0	0	0	0	0	0	0	0	0	0	0	0	0	0	0	0	0	0	0	0	0	0	0	1	0	3	1
Otu00784	0	0	1	2	0	1	0	0	1	1	3	2	1	0	1	2	0	0	0	0	0	1	0	0	1	1	1	0	1	0	1	0	1	1	0	0	1	0	0	0	0	1	1	0	0	0	0	0	0
Otu00785	0	0	1	0	0	0	1	2	0	0	2	1	0	0	1	1	1	0	1	1	1	0	0	0	0	0	0	0	0	0	0	0	0	0	0	0	0	1	1	0	2	0	0	1	0	0	0	0	0
Otu00786	1	0	0	1	0	0	0	0	0	1	0	0	0	1	0	2	0	1	0	0	0	1	0	0	0	0	0	0	0	0	0	0	0	0	0	0	0	0	0	0	1	0	0	1	1	3	0	0	0
Otu00787	0	0	0	0	0	0	0	0	0	0	0	0	0	1	1	0	0	1	0	0	0	0	1	0	1	1	2	3	0	0	0	0	1	0	0	0	1	0	2	0	0	0	0	0	0	1	0	0	2
Otu00788	0	1	0	0	0	0	0	0	0	1	0	0	0	0	0	0	0	0	0	0	0	0	1	0	1	0	0	0	0	0	1	0	0	1	0	0	0	0	0	0	0	0	0	0	0	0	0	0	0
Otu00789	0	1	2	0	1	1	1	2	0	1	1	0	0	0	1	1	0	1	0	0	1	0	0	0	0	0	1	0	1	2	1	0	3	0	0	1	0	0	0	0	0	0	0	0	1	0	0	0	0
Otu00790	0	0	1	0	0	0	1	1	0	0	0	0	0	0	0	0	0	0	0	1	0	0	0	0	0	0	1	2	1	1	0	0	0	0	0	0	0	0	1	0	0	0	1	0	0	0	1	0	0
Otu00791	1	0	0	0	1	2	0	1	0	2	0	1	0	0	0	0	0	0	0	0	0	0	0	0	0	0	0	3	1	0	0	2	1	0	0	1	1	0	2	0	0	0	0	0	0	0	0	0	0
Otu00792	0	0	0	0	0	0	0	0	0	1	0	0	0	0	0	0	0	0	1	0	0	0	1	0	0	0	0	0	0	0	1	0	0	0	1	0	0	1	0	0	0	0	2	0	0	0	0	0	0
Otu00793	0	0	0	1	0	0	1	1	0	0	0	0	1	0	0	0	0	2	0	1	0	0	0	0	0	1	0	1	0	1	0	0	1	0	0	1	0	0	0	0	1	2	0	0	1	0	0	0	0
Otu00794	0	0	2	0	0	0	1	0	2	3	0	1	1	1	0	0	2	2	0	0	1	1	0	0	0	0	0	0	0	0	1	0	0	0	0	0	2	1	0	0	0	0	0	0	0	1	0	0	0
Otu00795	0	0	2	1	0	0	0	0	0	0	1	1	1	0	0	0	0	0	1	0	0	0	2	0	1	0	0	0	0	0	1	1	0	0	1	0	0	1	0	1	0	1	1	0	1	0	0	0	2
Otu00796	0	0	0	1	0	0	1	0	1	1	0	0	0	0	0	0	0	0	0	0	0	0	0	0	0	0	0	0	0	0	0	0	2	0	0	2	1	0	0	0	0	0	0	0	0	0	2	2	2
Otu00797	0	0	0	0	0	0	0	0	0	0	1	1	0	0	1	0	0	0	0	0	0	1	0	0	0	1	0	0	0	0	1	0	0	0	0	0	0	0	0	0	0	0	0	0	0	0	0	1	0
Otu00798	0	1	1	0	0	0	0	2	0	1	0	0	1	0	0	0	0	0	0	0	0	0	0	1	0	2	1	0	1	0	0	0	1	1	3	0	0	0	0	0	0	0	0	1	0	0	0	0	0
Otu00799	0	1	2	1	0	1	0	0	0	0	0	0	0	0	0	2	0	0	0	0	0	1	0	1	0	0	1	0	0	1	3	0	0	1	0	0	0	0	0	0	0	0	0	0	0	1	0	0	0
Otu00800	1	0	0	2	0	0	1	1	1	2	0	0	1	0	0	0	0	0	0	0	0	0	0	0	0	0	0	3	0	0	0	0	0	0	0	1	0	0	0	1	0	0	0	0	0	0	0	0	0
Otu00801	2	0	0	0	0	0	1	0	1	0	1	0	0	0	1	0	1	0	1	0	0	0	1	0	0	0	0	0	0	0	0	0	0	0	1	0	0	0	0	0	0	1	2	1	0	0	0	0	0
Otu00802	0	0	0	1	0	0	0	0	0	0	0	0	0	0	0	0	0	0	0	0	0	0	0	0	0	0	0	1	1	1	1	0	1	1	0	2	0	0	1	1	0	1	0	1	0	0	0	0	1
Otu00803	2	3	0	0	0	0	1	0	0	0	1	1	1	0	1	2	1	0	1	1	0	0	0	0	0	0	0	0	0	1	0	0	0	0	1	0	0	0	1	0	0	0	0	0	0	0	0	1	0
Otu00804	0	0	0	0	2	0	0	0	0	1	0	1	0	0	0	0	0	0	0	0	0	0	0	0	0	0	0	0	1	1	0	0	1	1	1	0	0	0	1	0	0	2	0	0	1	0	0	0	0
Otu00805	0	0	0	0	0	0	0	0	0	0	0	1	0	0	0	0	0	0	0	0	0	0	0	0	0	1	0	0	0	2	1	1	1	0	0	0	1	1	1	0	1	0	0	0	0	1	0	0	0
Otu00806	0	2	1	0	0	1	0	0	0	0	2	1	0	1	1	0	2	0	0	0	0	1	0	0	0	0	0	0	0	1	0	1	0	0	0	0	0	0	1	0	1	0	0	0	0	0	0	0	0
Otu00807	1	0	0	0	0	0	0	0	0	0	0	0	0	0	0	0	0	0	0	0	0	0	0	0	0	0	0	0	0	0	0	0	0	0	0	0	0	0	2	0	2	3	2	2	1	2	0	2	1
Otu00808	1	0	2	0	0	1	0	0	0	1	2	0	0	0	0	0	1	1	2	1	0	0	0	1	1	0	1	1	0	1	0	0	0	0	0	1	1	1	0	0	0	0	0	0	0	0	1	0	0
Otu00809	0	0	0	0	0	0	0	0	0	0	0	0	0	0	0	0	0	0	0	0	0	0	0	0	0	0	0	0	0	0	0	0	0	0	0	0	0	0	0	1	0	1	2	3	2	2	1	0	1
Otu00810	0	0	0	0	0	0	0	0	0	0	0	0	0	0	0	0	0	0	0	0	0	0	0	0	1	0	2	0	0	0	1	0	2	1	0	1	0	0	0	0	0	1	0	0	0	0	1	0	0
Otu00811	0	0	0	0	1	2	0	1	1	1	0	0	2	0	0	1	0	0	0	0	0	0	0	0	1	1	1	3	1	1	0	0	2	0	0	0	0	0	0	1	0	0	0	0	0	0	0	0	0
Otu00812	0	2	0	0	1	1	0	2	0	0	0	1	0	0	0	0	0	0	0	0	0	0	0	0	0	0	1	1	0	2	1	0	0	0	0	1	1	0	0	0	0	0	0	0	0	0	0	0	0
Otu00813	0	0	0	2	0	0	3	0	0	0	0	0	0	0	1	1	0	0	0	0	0	0	1	1	0	0	0	1	0	0	0	0	0	0	0	0	1	0	0	0	0	0	1	0	1	0	0	0	0
Otu00814	0	2	0	0	1	1	1	0	0	1	1	1	0	0	0	0	1	0	0	0	0	1	0	1	0	0	0	0	1	0	0	0	1	1	0	1	0	0	0	1	0	0	1	0	1	0	0	0	0
Otu00815	2	0	0	1	1	0	0	2	0	1	1	0	1	1	0	1	0	0	4	0	0	0	0	0	0	0	0	1	0	0	0	0	1	0	3	0	0	0	1	1	0	1	0	0	0	1	0	0	1
Otu00816	1	0	0	0	1	0	0	1	0	0	0	1	0	1	0	0	0	0	0	0	0	0	0	0	1	0	0	2	2	2	0	1	2	1	0	0	0	0	0	0	0	0	0	0	0	0	0	0	0
Otu00817	0	1	0	0	0	0	0	0	0	0	0	0	0	0	1	0	0	0	0	0	0	2	0	1	1	0	0	1	0	1	0	0	0	0	0	1	1	1	1	1	0	0	0	0	0	0	1	0	0
Otu00818	1	1	0	0	0	0	2	0	0	1	0	0	0	0	0	1	2	0	0	0	0	0	0	0	0	1	0	0	1	0	0	0	1	0	0	0	0	0	0	0	0	0	1	1	0	0	0	0	0
Otu00819	0	0	0	1	0	0	0	0	0	0	0	0	0	0	0	2	0	1	2	0	0	0	0	0	0	0	1	1	0	1	2	1	1	0	1	0	1	1	0	0	0	0	0	0	1	0	0	0	0
Otu00820	0	0	0	0	0	0	0	0	0	0	0	0	0	0	0	1	3	1	1	1	0	0	1	0	1	0	0	0	0	0	0	0	0	0	0	0	0	0	0	0	0	0	1	0	1	0	0	0	0
Otu00821	0	0	1	1	0	1	1	1	2	0	1	0	1	0	1	0	1	0	0	0	0	0	0	0	0	0	0	1	1	3	1	1	0	0	1	0	1	1	0	0	0	0	0	0	0	0	1	1	0
Otu00822	0	3	3	0	1	0	0	0	1	0	1	4	0	1	1	0	1	1	1	0	0	0	0	0	0	0	1	0	0	0	0	0	0	0	0	0	0	0	1	0	0	1	0	1	1	0	0	0	0
Otu00823	0	0	0	0	0	0	2	1	0	1	0	0	0	1	1	1	0	0	0	1	0	1	0	0	0	1	0	0	2	0	0	0	3	1	2	0	0	0	0	1	1	0	0	1	0	0	0	0	0
Otu00824	0	0	0	0	0	0	0	0	0	0	0	1	0	0	0	0	0	0	0	0	0	0	2	1	0	0	0	0	0	0	1	0	0	1	0	0	2	1	0	0	1	0	0	1	0	2	0	3	1
Otu00825	1	1	1	0	0	0	0	0	0	2	0	0	0	0	0	0	0	0	1	2	0	0	0	0	0	0	0	0	0	0	0	0	0	0	0	0	0	0	0	3	0	4	1	0	0	0	0	0	0
Otu00826	0	0	0	0	0	0	0	0	0	0	0	0	0	0	0	0	0	0	0	0	0	0	0	0	0	0	0	0	0	0	0	0	0	0	0	0	0	0	0	0	0	0	0	0	0	0	0	0	0
Otu00827	0	0	0	0	0	0	0	0	1	1	0	0	1	0	0	0	0	0	0	0	0	0	0	0	0	0	0	0	0	2	1	0	1	0	0	1	1	1	0	0	0	0	1	0	0	0	0	0	0
Otu00828	1	1	2	3	1	0	1	0	3	0	3	2	3	2	0	0	0	0	0	1	1	0	0	0	0	0	0	0	0	0	0	0	0	0	1	0	0	0	0	0	1	0	0	0	0	0	0	0	0
Otu00829	0	0	0	0	1	0	2	0	0	0	0	0	1	0	0	0	0	0	0	0	0	0	0	0	1	0	0	0	0	0	0	0	1	0	0	0	1	0	0	0	0	0	0	0	0	0	0	0	0
Otu00830	0	1	0	0	1	0	2	3	3	1	1	0	0	1	0	0	0	0	0	0	0	0	0	0	0	0	0	1	0	0	0	0	0	1	0	0	0	0	0	0	0	0	0	0	0	0	0	0	0
Otu00831	0	2	0	0	0	0	0	0	0	1	2	2	2	0	0	0	0	0	0	0	0	0	0	0	0	0	1	0	0	0	2	1	0	0	0	1	1	0	1	1	0	0	1	0	1	0	0	0	0
Otu00832	1	0	0	0	2	0	0	1	1	1	1	1	1	0	0	1	1	0	0	0	0	1	1	0	1	0	0	0	0	0	0	0	0	0	0	0	0	0	0	0	0	0	0	0	0	0	1	2	1
Otu00833	0	0	0	0	0	0	0	0	0	0	0	0	0	0	0	0	0	0	1	0	2	0	0	0	3	2	0	0	0	0	0	0	1	0	0	0	0	1	0	0	0	0	0	0	0	0	0	1	0
Otu00834	0	0	0	0	0	0	0	0	0	1	0	1	0	0	1	1	0	0	1	1	0	0	0	0	0	0	0	0	0	1	0	2	0	0	0	0	0	0	0	0	0	0	0	0	0	0	0	1	0
Otu00835	0	0	0	0	0	0	0	1	2	0	1	0	2	2	1	0	0	0	1	2	0	0	0	1	0	1	0	0	0	0	0	0	0	0	0	0	0	0	0	1	0	1	0	0	0	1	0	0	0
Otu00836	0	0	1	0	1	2	0	1	1	0	0	0	1	0	1	0	0	0	0	0	0	1	0	0	0	0	1	0	3	1	0	0	0	1	0	0	0	0	0	0	0	0	0	0	2	0	0	0	1
Otu00837	0	3	0	0	1	2	1	2	0	0	1	0	1	1	0	0	0	0	1	0	0	0	1	0	0	0	0	0	0	0	1	0	0	0	1	0	1	0	0	0	0	0	0	0	0	0	1	1	0
Otu00838	0	0	0	1	0	0	0	1	0	0	0	0	0	0	1	1	1	0	0	0	0	0	2	2	2	1	0	0	0	0	0	0	0	1	1	0	1	0	0	0	0	2	0	0	1	0	0	0	0
Otu00839	0	0	0	0	0	0	0	0	2	0	1	0	1	0	0	0	1	0	3	1	0	0	0	0	2	0	0	1	0	1	0	0	0	0	0	0	0	0	0	0	1	0	0	0	0	0	0	0	0
Otu00840	0	0	1	0	2	0	2	1	1	0	0	0	0	2	0	1	0	1	1	0	0	0	0	0	0	2	0	0	1	0	0	0	0	0	0	0	0	0	0	0	0	0	0	2	0	0	0	0	0
Otu00841	0	1	0	1	0	0	1	0	0	1	0	0	0	0	0	0	0	0	0	0	0	0	0	0	0	0	0	0	0	0	0	0	0	0	0	1	0	0	0	1	1	0	0	0	0	0	0	0	0
Otu00842	0	0	1	0	0	0	0	2	0	1	0	0	0	0	0	1	0	2	0	0	0	0	0	1	0	0	0	1	1	0	0	1	1	0	0	1	2	0	0	0	0	0	0	0	0	0	0	0	1
Otu00843	0	0	1	0	0	0	0	0	0	0	1	0	0	0	0	0	0	0	0	0	0	1	0	0	0	0	0	1	0	0	0	0	0	1	0	0	0	0	0	0	0	0	0	0	0	0	0	0	0
Otu00844	1	0	0	0	0	0	0	0	0	0	0	0	0	0	0	0	0	1	0	0	0	0	0	0	0	0	0	2	2	1	0	1	1	0	0	0	0	0	0	0	0	1	1	0	0	0	0	0	1
Otu00845	0	0	0	0	0	0	0	0	0	0	0	0	0	0	0	0	0	0	0	0	1	0	0	0	1	1	0	0	0	0	0	0	0	0	0	0	0	0	0	0	0	0	0	0	0	0	0	0	0
Otu00846	1	1	0	0	0	0	1	0	0	1	0	0	0	0	0	1	0	0	1	0	1	0	0	0	1	0	1	0	0	1	0	0	0	1	0	2	0	0	0	0	1	0	0	0	0	0	0	0	0
Otu00847	0	0	0	0	0	0	0	0	0	1	1	0	0	0	0	0	0	0	1	0	0	1	1	2	0	1	0	0	0	0	0	0	0	0	1	1	0	0	0	0	0	0	0	0	0	0	0	0	1
Otu00848	1	1	0	2	0	0	1	0	0	1	0	1	0	0	3	1	1	3	0	0	1	0	0	0	0	0	0	0	1	0	0	0	0	0	0	0	0	0	0	0	0	0	0	2	0	0	0	0	0
Otu00849	0	0	0	0	1	0	0	0	1	0	0	0	0	0	0	0	0	0	0	0	1	0	1	0	1	0	0	0	0	0	0	0	0	1	0	0	1	1	0	0	0	0	0	0	0	0	0	0	1
Otu00850	0	0	1	0	1	0	1	0	0	0	0	0	0	0	0	0	0	0	0	0	0	0	0	0	0	0	0	0	0	1	2	1	3	1	0	1	2	0	0	0	0	0	0	0	0	0	0	0	0
Otu00851	0	0	0	0	1	0	0	1	0	0	0	1	0	0	0	0	0	0	0	0	0	0	0	0	0	0	2	1	0	0	0	0	0	0	0	0	0	2	0	0	0	0	1	0	1	1	0	0	0
Otu00852	0	0	0	0	1	3	2	0	0	1	1	1	0	0	0	1	1	0	0	0	1	0	0	2	1	0	0	2	0	0	0	1	3	0	1	0	0	0	0	1	1	0	0	0	0	0	0	0	0
Otu00853	0	0	0	0	1	1	0	0	0	0	0	0	0	0	0	1	0	0	1	1	0	1	0	0	0	0	0	0	0	0	0	0	1	0	0	0	0	1	0	0	0	0	1	0	0	0	0	0	0
Otu00854	0	1	1	0	0	1	1	0	0	1	1	0	1	1	0	0	2	0	0	0	0	0	0	0	0	2	0	0	0	0	0	0	0	0	0	0	0	0	0	1	0	0	0	0	0	0	0	1	0
Otu00855	0	0	0	0	0	0	0	0	0	0	0	0	0	0	0	0	0	0	0	0	0	0	1	0	0	0	0	1	1	0	0	0	0	0	0	0	1	0	1	0	2	0	1	0	1	1	2	0	0
Otu00856	0	0	0	0	0	0	0	0	0	0	0	0	0	0	0	1	0	0	0	0	0	0	0	0	0	0	1	0	1	0	1	0	2	1	0	0	2	1	1	0	0	0	0	0	0	0	0	0	0
Otu00857	0	0	0	0	0	0	0	2	0	0	0	0	0	0	0	0	0	0	0	1	0	0	0	0	0	0	0	0	0	0	0	0	0	0	0	0	0	0	0	0	0	0	0	0	0	0	0	0	0
Otu00858	0	0	0	1	0	0	1	1	0	0	0	0	0	0	1	0	0	1	1	1	0	0	0	1	0	0	0	1	0	0	0	0	0	0	0	0	1	0	1	0	2	1	0	0	0	1	0	0	0
Otu00859	0	1	1	2	0	0	0	1	1	0	1	1	0	1	1	0	1	0	0	2	0	0	0	0	0	0	1	1	0	0	0	0	0	0	0	0	0	0	0	2	0	0	0	0	1	0	0	0	1
Otu00860	0	1	0	0	0	1	0	0	0	1	0	0	0	0	0	0	0	1	2	1	0	1	1	0	2	0	0	0	0	0	0	1	2	0	0	0	0	1	0	0	0	0	0	0	0	1	0	0	0
Otu00861	0	0	0	0	0	0	0	0	0	0	1	0	0	0	1	0	1	0	0	0	0	1	0	0	0	0	0	0	0	0	0	0	0	0	0	0	0	1	0	1	0	1	0	0	0	0	0	0	0
Otu00862	1	0	0	0	0	0	0	1	0	0	0	1	0	0	0	0	0	0	0	0	2	1	1	0	1	1	0	0	0	0	0	0	0	0	0	1	0	0	0	0	0	0	0	0	0	2	0	1	1
Otu00863	0	0	0	0	0	0	0	0	0	0	0	0	0	0	0	0	0	0	1	0	0	1	0	0	0	0	1	0	1	0	0	0	0	0	0	1	1	0	0	0	0	0	0	0	1	1	1	0	0
Otu00864	2	0	0	0	0	0	0	0	0	0	2	1	1	2	0	0	0	1	1	0	0	0	0	0	1	0	1	0	0	0	0	0	0	0	0	0	0	0	2	0	1	0	0	1	0	1	0	1	0
Otu00865	0	0	0	0	0	0	0	0	0	0	0	0	0	0	1	0	0	0	1	1	0	0	1	1	0	1	0	1	0	0	0	0	0	0	0	0	0	0	1	0	0	0	0	2	0	0	1	0	0
Otu00866	1	0	0	1	1	1	0	0	1	0	0	0	0	0	0	0	0	1	0	0	1	0	1	0	0	1	0	0	0	0	0	0	0	0	1	1	0	1	0	0	0	1	0	0	1	0	0	1	1
Otu00867	1	1	1	1	0	2	2	2	2	0	1	1	0	1	2	0	0	0	0	0	0	0	0	0	0	0	0	0	0	1	0	0	0	0	1	0	0	0	0	0	0	0	0	0	0	0	0	0	0
Otu00868	0	1	0	0	0	0	0	0	1	0	0	0	0	0	1	0	0	0	0	0	0	0	0	0	0	0	0	0	0	0	0	0	0	0	0	0	0	0	0	0	0	0	0	0	0	0	0	1	0
Otu00869	0	0	0	0	0	0	0	1	1	1	1	0	0	0	0	0	0	1	0	0	1	1	0	0	0	1	0	0	0	0	0	0	0	0	0	0	0	0	0	0	0	0	0	2	0	0	1	0	0
Otu00870	0	0	0	0	0	0	1	1	0	0	0	0	0	0	0	0	0	0	0	0	1	0	1	0	0	0	1	0	0	0	0	0	0	1	1	0	1	1	0	0	1	0	0	0	0	1	2	0	0
Otu00871	0	1	0	0	0	0	0	0	1	1	1	0	1	0	1	1	0	0	0	0	0	0	0	0	0	0	1	2	0	0	1	0	1	0	0	1	2	0	0	0	0	0	0	0	0	0	0	1	0
Otu00872	0	0	0	0	1	0	0	0	1	0	0	0	0	0	0	1	0	0	0	0	0	1	0	0	0	0	0	0	1	0	0	0	0	0	0	0	0	0	2	1	0	1	0	0	0	0	0	0	0
Otu00873	0	0	0	0	1	1	0	0	0	0	0	0	0	0	0	0	0	0	0	0	1	0	0	1	0	1	0	0	0	0	0	0	0	0	0	0	0	1	1	0	0	1	0	0	1	0	1	0	0
Otu00874	0	1	0	0	0	0	0	1	0	0	0	0	0	0	1	1	0	0	0	1	0	1	1	1	0	0	0	0	1	0	0	0	0	0	0	0	0	1	0	0	1	0	0	0	0	1	0	2	0
Otu00875	1	0	1	0	1	1	0	1	1	1	0	0	0	1	0	0	0	0	0	0	0	0	0	0	0	0	1	1	1	2	1	2	0	1	2	0	1	1	1	0	0	1	0	0	0	0	0	0	0
Otu00876	0	0	0	0	0	0	0	0	0	0	0	0	0	0	0	0	0	0	0	0	0	0	0	0	0	1	1	0	0	0	0	0	1	1	0	0	0	0	0	0	0	1	1	0	0	0	1	0	0
Otu00877	0	0	0	0	0	0	0	0	0	0	0	0	0	0	0	0	0	0	1	0	2	1	0	1	0	1	0	1	0	0	0	0	0	0	0	0	1	0	0	0	0	0	0	0	0	0	1	0	1
Otu00878	0	1	1	1	1	0	0	0	0	1	1	0	2	0	1	0	0	0	0	0	0	1	0	0	0	0	0	0	0	0	0	0	0	0	0	0	0	0	2	0	0	0	0	0	1	0	0	1	0
Otu00879	0	1	0	0	1	0	1	3	0	0	0	0	0	0	0	0	1	0	0	0	0	0	0	0	0	0	0	3	0	0	0	0	0	2	0	2	0	0	1	0	0	1	0	0	0	0	0	0	0
Otu00880	0	0	0	0	0	0	0	0	0	0	0	0	0	0	0	1	0	0	0	0	3	0	1	1	0	1	0	0	0	0	1	0	0	0	0	0	1	0	0	0	0	0	1	0	0	0	0	1	0
Otu00881	0	1	0	0	0	0	0	0	0	0	0	0	0	0	0	0	0	0	1	0	1	0	0	0	0	0	0	0	0	1	1	0	0	0	0	1	0	0	0	0	0	0	0	1	0	0	0	1	1
Otu00882	1	0	1	1	2	0	0	0	1	1	1	0	0	1	1	1	0	0	0	1	0	0	0	0	1	0	0	0	0	1	0	0	0	0	0	0	0	0	0	0	0	1	0	0	0	0	1	0	1
Otu00883	0	1	2	0	1	0	0	0	0	0	0	1	0	1	1	0	0	0	0	1	0	0	0	0	0	0	1	0	0	0	0	0	0	0	0	1	3	0	0	0	0	0	0	0	1	3	0	0	0
Otu00884	0	1	0	0	1	0	1	0	3	0	0	0	0	1	0	0	0	0	0	0	0	0	0	0	0	0	0	0	0	0	0	0	0	0	0	0	0	0	0	0	0	0	0	0	0	0	0	0	0
Otu00885	0	1	0	0	0	0	0	0	0	1	0	0	0	0	0	0	0	0	0	0	0	0	0	0	0	0	1	0	1	0	1	0	1	2	0	0	1	0	0	0	0	1	0	0	0	0	0	0	0
Otu00886	0	0	0	0	0	0	0	0	0	0	0	0	0	0	1	0	0	0	2	1	2	2	1	0	0	0	0	0	0	0	0	0	0	0	0	0	0	0	0	0	1	0	1	0	0	0	1	0	0
Otu00887	0	0	0	0	0	1	0	3	0	1	0	0	2	0	0	1	0	0	0	0	0	0	0	0	0	0	1	0	1	1	0	0	2	0	0	0	0	0	0	0	0	0	0	0	0	1	0	0	0
Otu00888	0	0	0	0	1	0	0	0	1	0	1	0	0	0	0	0	0	0	0	0	0	0	2	1	0	0	0	0	0	0	0	0	0	0	0	0	0	0	0	1	0	0	0	1	2	0	0	1	0
Otu00889	0	0	0	0	0	0	1	0	0	0	1	0	0	0	0	0	1	0	0	0	0	0	0	0	0	0	1	0	0	0	0	1	1	0	1	1	2	1	0	0	1	0	0	0	1	0	0	0	0
Otu00890	0	0	1	0	0	2	1	0	0	0	0	0	0	0	0	0	2	0	0	0	1	0	0	0	0	1	0	1	2	0	0	0	2	2	2	1	1	0	1	0	0	0	0	0	0	0	0	0	0
Otu00891	0	0	0	0	0	0	0	0	0	0	0	0	0	0	0	0	0	0	0	0	0	0	0	0	0	0	0	0	2	0	0	0	0	0	0	1	0	1	0	0	0	1	0	0	1	0	0	0	1
Otu00892	0	0	0	0	0	0	0	1	0	0	1	0	0	0	1	0	0	0	0	1	0	0	0	0	0	0	1	0	1	0	0	1	0	0	0	1	0	0	1	0	0	0	0	1	0	0	0	0	1
Otu00893	0	0	1	2	0	0	1	0	1	0	0	1	0	0	0	0	1	0	0	0	0	0	0	0	0	0	1	0	0	0	1	0	1	1	1	0	0	1	1	0	1	0	0	0	0	0	1	0	0
Otu00894	0	0	0	0	0	0	0	1	2	0	1	1	0	1	0	0	0	1	1	2	0	0	0	0	0	0	1	0	0	0	0	0	0	1	0	0	0	0	1	0	0	0	0	0	0	1	0	1	0
Otu00895	0	2	0	0	0	0	0	0	0	1	0	0	1	0	0	1	0	0	0	0	0	0	0	0	0	0	1	1	0	1	0	1	2	0	2	0	3	1	0	0	0	0	1	0	0	0	0	0	0
Otu00896	0	0	0	0	0	0	0	1	0	0	0	1	1	0	0	0	0	1	0	1	2	0	0	0	0	1	0	0	0	0	1	0	0	1	2	0	0	0	0	0	0	1	1	0	1	0	0	1	1
Otu00897	0	1	2	0	1	0	1	0	3	2	0	4	0	0	0	1	0	0	0	1	0	0	0	0	0	0	1	0	0	0	0	0	0	1	0	0	0	0	2	1	0	2	0	0	0	1	0	0	0
Otu00898	1	0	1	0	1	1	0	0	0	1	0	0	0	0	0	0	0	1	1	0	0	0	0	0	0	0	1	2	1	0	0	0	0	0	0	1	1	0	1	1	0	0	1	1	1	0	0	0	0
Otu00899	0	0	0	0	0	0	0	0	0	0	0	0	0	0	1	1	0	3	1	0	2	0	0	0	0	0	0	0	0	0	0	0	1	0	1	0	0	1	0	1	3	0	0	0	0	0	0	0	0
Otu00900	0	0	0	0	0	0	0	0	0	1	0	0	0	0	0	0	0	0	1	0	0	0	0	0	0	0	1	0	2	0	0	0	0	0	0	0	1	0	0	0	1	0	0	0	0	0	0	0	0
Otu00901	0	0	0	0	1	0	0	0	0	0	0	0	0	0	0	0	0	0	0	0	0	0	0	0	0	0	1	0	1	0	0	0	0	1	0	0	0	0	0	0	0	0	0	1	0	0	0	0	0
Otu00902	0	1	0	0	0	0	0	0	0	1	0	0	0	0	0	0	0	0	0	1	1	0	1	0	0	1	0	0	0	0	0	0	0	0	0	0	0	0	0	0	0	0	0	0	0	0	0	0	0
Otu00903	0	0	0	0	2	0	0	0	0	0	1	0	2	1	0	0	0	1	0	0	0	0	0	0	0	0	2	1	1	0	0	0	0	0	2	1	0	0	0	1	0	0	0	1	0	1	0	0	0
Otu00904	0	0	0	0	0	0	0	0	0	1	0	0	0	0	0	0	0	0	1	1	0	0	0	0	0	0	0	0	0	0	0	0	0	1	0	0	0	0	0	0	1	0	0	0	0	0	0	0	1
Otu00905	0	0	0	0	0	0	0	0	2	1	0	1	0	0	1	1	1	0	0	1	1	0	0	1	0	1	0	0	0	0	0	0	0	1	0	0	0	0	0	1	0	0	0	0	0	0	0	0	1
Otu00906	0	0	0	0	1	0	0	0	0	1	0	4	0	0	1	1	0	0	0	0	0	0	0	0	0	0	0	0	0	1	0	1	0	0	0	0	1	0	0	0	0	1	0	0	1	0	0	0	0
Otu00907	0	0	0	0	0	0	0	0	0	0	0	0	0	0	0	0	1	0	0	0	0	1	0	0	0	0	0	0	0	0	0	0	0	1	0	1	0	1	0	0	1	0	0	0	0	1	1	0	0
Otu00908	0	0	1	1	2	0	1	0	0	0	0	1	0	0	0	0	1	1	0	2	0	1	0	1	0	0	0	0	0	0	0	0	0	1	0	0	0	0	1	0	0	0	0	1	0	1	1	0	1
Otu00909	0	0	0	0	0	0	0	0	0	0	0	1	0	0	1	0	0	1	0	0	0	0	0	0	1	0	0	0	0	0	0	0	0	1	0	0	0	0	0	0	0	0	0	0	0	0	0	1	0
Otu00910	0	0	0	0	0	0	0	0	0	0	0	0	0	0	0	0	0	0	0	0	0	0	0	0	0	0	0	0	0	0	0	0	0	0	0	0	0	0	0	0	0	0	0	0	0	0	0	0	0
Otu00911	0	0	0	0	0	0	0	0	0	0	0	0	0	0	0	0	0	0	0	0	0	0	1	0	0	1	0	0	0	0	0	0	0	0	0	0	0	0	0	0	0	1	2	0	4	0	0	1	1
Otu00912	0	0	0	0	0	0	0	0	0	0	0	0	0	0	0	0	0	0	0	0	0	0	1	2	0	0	1	1	1	0	0	0	0	0	0	0	0	0	0	0	0	1	0	2	3	1	0	1	1
Otu00913	0	1	1	0	0	0	0	0	0	0	0	0	0	0	0	0	0	0	1	0	0	0	0	0	0	0	2	0	0	1	0	0	0	2	0	0	0	1	1	0	0	0	0	1	1	0	0	0	0
Otu00914	0	0	0	0	0	0	0	0	0	0	0	0	0	0	2	0	0	0	0	1	0	0	0	0	0	2	0	1	0	0	0	0	0	1	0	1	0	0	0	1	0	0	0	1	0	0	1	0	1
Otu00915	0	2	1	0	0	0	0	0	0	0	0	0	1	2	0	0	0	0	0	1	0	2	0	0	0	0	0	0	0	0	1	0	0	0	1	0	0	0	2	0	1	0	1	1	0	0	0	1	0
Otu00916	0	0	0	0	0	0	0	1	1	0	0	0	0	0	0	0	1	1	0	0	1	0	1	0	0	0	1	0	0	0	0	2	2	2	0	1	0	3	0	0	0	0	0	0	0	0	0	0	0
Otu00917	0	1	0	0	0	0	0	0	0	0	0	0	0	0	0	1	0	0	0	1	0	0	0	0	0	1	0	2	0	0	0	0	1	0	0	0	0	0	0	0	0	0	0	0	0	1	2	0	0
Otu00918	0	0	2	1	1	1	0	1	0	0	1	0	0	0	0	0	0	1	0	1	0	0	0	0	0	0	1	0	0	0	0	0	1	1	1	1	0	1	0	0	1	0	0	0	0	0	0	0	0
Otu00919	0	1	0	0	3	1	0	0	0	0	1	1	0	1	1	0	0	0	0	0	0	0	0	0	0	0	0	0	0	0	0	1	0	0	0	0	0	0	1	1	0	0	0	1	0	0	0	0	0
Otu00920	0	0	1	0	0	0	0	0	1	1	0	1	0	0	0	2	0	0	0	2	0	0	0	0	2	0	0	0	0	0	0	0	0	0	0	0	0	0	0	0	1	0	1	1	0	0	0	0	0
Otu00921	0	0	0	0	0	0	0	0	0	0	0	0	0	0	0	0	0	0	0	0	0	0	0	0	0	0	0	1	0	0	1	1	1	1	1	0	0	0	0	0	1	1	0	0	0	0	1	0	0
Otu00922	0	1	0	0	0	0	1	3	0	0	0	0	0	0	0	0	0	3	0	0	0	0	0	0	0	0	1	1	2	0	0	0	1	0	0	1	0	0	0	0	0	0	1	0	0	1	0	0	0
Otu00923	1	0	2	0	0	3	0	0	0	0	1	0	1	0	0	0	0	0	0	0	0	1	0	0	0	0	0	0	0	0	0	2	0	0	0	0	1	1	0	1	0	0	0	2	0	0	0	0	0
Otu00924	0	0	1	0	0	0	1	0	0	1	0	0	2	0	0	3	1	0	0	0	0	0	0	0	0	1	0	0	0	0	0	0	0	1	0	0	0	3	0	0	0	0	0	1	0	0	0	1	0
Otu00925	0	0	1	1	3	1	1	0	1	1	1	2	1	1	1	0	0	0	0	1	0	0	0	0	0	0	1	0	0	1	0	0	1	1	0	1	0	1	1	0	1	0	0	0	0	0	0	0	0
Otu00926	0	0	0	0	0	0	0	1	0	0	0	0	0	0	0	0	0	0	0	0	1	2	0	0	0	0	0	0	0	1	0	0	0	0	1	0	0	0	0	0	0	0	0	0	0	0	0	0	0
Otu00927	1	0	0	0	0	1	0	0	1	0	0	0	0	1	1	0	0	0	0	1	1	0	0	0	0	0	2	1	0	0	1	1	0	0	1	0	0	2	1	0	0	0	0	0	0	0	0	0	0
Otu00928	0	0	1	0	2	0	0	0	0	0	1	0	0	0	0	0	1	0	0	0	0	0	0	0	0	0	1	0	0	3	1	0	0	1	1	0	1	1	1	0	1	0	0	0	0	1	2	0	0
Otu00929	0	0	1	0	0	1	0	0	0	1	1	0	1	1	1	0	0	0	0	0	0	0	1	0	0	0	0	1	0	0	0	0	0	0	0	1	0	0	0	0	1	0	0	1	0	0	0	0	0
Otu00930	1	0	0	0	0	0	0	1	1	0	0	0	0	0	0	1	0	0	1	0	0	0	0	0	0	1	0	4	0	0	1	2	2	1	1	0	0	0	0	1	0	0	0	0	1	0	0	0	0
Otu00931	0	0	0	1	1	0	0	1	0	1	1	1	0	0	0	0	0	0	0	1	0	0	0	0	0	0	0	0	0	0	0	0	0	0	0	0	0	0	0	2	0	1	0	0	1	0	0	0	1
Otu00932	1	1	0	0	0	1	0	0	0	0	0	1	0	0	0	0	0	0	0	0	0	0	0	0	0	0	0	0	0	0	0	2	1	0	0	1	0	0	0	1	0	1	0	1	1	1	0	0	0
Otu00933	0	0	0	1	0	0	0	0	0	0	0	1	0	0	0	0	0	0	1	0	0	0	0	0	0	0	1	1	0	0	1	4	0	1	0	2	0	0	0	0	0	0	0	0	0	0	0	0	0
Otu00934	0	1	0	2	0	1	1	0	0	1	1	1	1	4	0	0	1	0	1	0	0	0	0	0	0	0	0	0	0	0	0	0	0	0	1	0	0	0	0	0	0	1	0	0	0	1	0	0	0
Otu00935	0	0	0	0	0	0	0	1	0	0	0	0	0	0	0	0	0	0	1	0	0	0	0	1	1	0	0	0	0	0	1	0	0	1	0	0	1	0	0	0	1	0	0	0	0	0	0	0	1
Otu00936	0	0	0	0	0	0	1	0	0	0	0	0	0	0	0	0	0	0	0	0	0	0	0	0	0	0	0	0	0	0	1	0	1	0	1	0	0	0	0	0	0	0	0	0	0	0	0	0	0
Otu00937	1	1	1	0	1	0	0	1	1	0	0	1	1	0	1	0	0	0	0	0	0	0	0	0	1	0	0	0	0	0	0	0	0	0	0	0	0	0	1	2	0	0	1	0	2	0	0	0	0
Otu00938	0	0	0	0	0	0	2	0	0	0	0	0	0	0	1	0	0	0	0	1	0	0	0	0	0	0	3	1	0	0	0	0	3	0	0	1	0	0	0	0	0	1	0	0	0	0	0	0	0
Otu00939	0	0	0	0	0	0	0	0	0	0	0	0	0	0	0	0	1	0	0	0	0	0	0	0	0	0	0	0	0	0	0	1	0	0	1	0	0	0	0	0	0	0	0	0	1	0	0	0	0
Otu00940	0	0	1	0	0	1	2	0	1	1	0	1	0	1	0	0	2	1	1	1	0	0	0	1	0	0	0	0	0	0	0	0	0	0	1	0	0	1	0	0	0	0	0	0	0	0	0	0	0
Otu00941	0	0	0	0	0	0	0	0	0	0	0	0	0	0	0	0	0	0	0	0	1	0	1	0	0	0	0	1	0	0	0	0	0	1	0	1	0	0	0	0	0	0	0	0	0	0	0	0	0
Otu00942	0	0	1	0	2	0	1	0	0	0	1	0	0	1	0	2	0	0	0	0	1	1	0	0	0	0	1	0	0	0	1	0	0	0	0	0	1	2	0	0	0	0	0	1	0	1	0	0	0
Otu00943	0	0	0	0	0	0	0	1	0	0	0	0	0	0	0	0	0	0	0	0	0	0	0	0	0	0	0	0	2	0	0	0	0	0	0	0	0	0	0	0	0	0	0	0	0	0	0	0	0
Otu00944	0	0	0	0	0	0	0	0	0	0	1	0	0	0	0	0	0	0	0	0	1	0	0	0	0	0	0	0	0	0	0	0	0	0	0	0	1	2	0	0	0	0	1	0	1	0	1	2	0
Otu00945	0	0	0	0	0	0	0	0	1	0	0	0	0	1	0	0	0	1	1	1	0	1	1	0	0	0	0	1	0	0	1	0	0	0	0	2	0	0	0	1	0	1	0	0	0	1	0	1	1
Otu00946	0	0	0	0	0	1	0	0	1	0	1	3	1	0	0	1	2	0	0	0	0	0	0	0	0	0	0	0	1	0	0	0	1	0	0	0	0	0	0	0	0	0	0	0	0	0	0	0	0
Otu00947	0	1	0	0	0	0	0	0	0	2	0	0	0	0	0	0	1	0	0	1	0	0	0	0	0	0	0	1	2	1	0	0	1	1	1	0	0	0	0	1	0	0	1	0	1	0	0	0	0
Otu00948	0	0	0	1	0	0	0	0	0	0	0	0	1	1	0	0	0	0	0	1	0	1	0	0	0	0	1	0	0	2	1	1	0	1	1	0	1	0	0	0	1	0	0	0	0	0	0	0	2
Otu00949	0	0	0	0	0	1	0	0	0	0	0	0	0	0	0	0	0	0	0	1	0	0	0	0	0	0	0	1	0	0	2	0	1	1	5	0	0	1	1	0	0	0	0	0	0	0	1	0	0
Otu00950	0	0	1	0	0	0	0	0	0	0	2	0	0	0	0	0	1	0	0	0	0	1	0	0	1	0	0	0	0	1	0	0	1	0	0	0	0	0	0	1	0	0	0	0	0	1	1	0	1
Otu00951	0	0	0	0	0	0	0	0	0	0	0	0	0	0	0	1	0	0	0	0	0	0	0	0	0	0	0	0	0	0	0	0	0	1	0	0	0	0	0	0	0	0	0	0	0	1	0	0	0
Otu00952	0	1	0	0	2	0	0	1	0	1	0	0	0	0	1	0	0	1	0	0	0	0	0	0	0	1	0	1	0	0	1	0	0	0	2	0	0	0	0	1	1	0	0	0	1	0	0	0	0
Otu00953	0	0	1	0	0	0	0	1	1	0	0	0	0	0	0	1	0	0	0	0	1	0	0	0	1	0	0	0	0	0	0	0	0	0	0	0	0	0	0	0	0	0	0	0	0	0	0	0	0
Otu00954	1	0	0	0	0	0	0	0	0	1	0	1	0	0	0	1	0	1	0	1	2	4	0	0	0	1	0	0	0	0	0	1	0	0	0	0	0	1	0	1	0	0	0	0	0	0	0	0	0
Otu00955	0	0	0	0	0	0	0	0	0	0	0	0	0	0	0	0	0	0	0	0	1	1	1	0	1	0	0	0	0	0	0	0	0	0	0	0	0	0	0	0	0	0	0	0	0	0	0	1	0
Otu00956	0	0	0	0	0	1	0	1	1	0	0	0	0	0	0	0	0	0	2	0	0	0	0	0	1	0	0	0	0	0	0	0	1	0	0	1	0	0	1	0	0	0	0	0	0	0	0	1	0
Otu00957	0	0	0	0	0	0	0	0	0	0	1	0	0	0	0	0	0	0	0	0	0	0	2	1	0	0	0	0	0	0	0	1	0	0	0	1	0	1	0	1	0	0	0	0	0	0	0	0	0
Otu00958	0	0	1	0	1	1	1	0	1	0	0	0	0	0	0	0	0	0	0	0	0	0	0	0	0	0	0	0	0	0	0	1	0	0	0	0	1	0	0	0	0	0	0	1	1	0	2	1	0
Otu00959	0	0	0	0	0	0	3	0	0	0	0	0	0	0	0	1	0	0	0	1	0	0	0	0	0	0	1	0	1	3	0	0	1	1	1	0	1	1	0	0	0	0	1	0	0	0	0	0	0
Otu00960	0	0	3	0	0	0	1	0	0	0	3	0	0	0	0	0	0	0	0	0	0	0	0	0	0	0	0	1	0	0	0	0	0	0	0	0	0	0	0	0	1	0	0	2	0	0	1	0	0
Otu00961	0	0	0	0	0	0	0	4	3	0	0	0	0	0	1	2	1	0	1	0	0	0	0	0	0	0	0	0	0	0	1	0	0	1	0	0	0	0	1	0	0	0	0	0	0	0	0	0	0
Otu00962	0	0	0	0	0	0	0	1	0	0	0	0	0	0	0	0	0	0	0	0	0	1	0	0	0	0	0	0	0	0	0	0	0	0	0	1	1	0	0	0	0	0	0	1	1	0	0	2	0
Otu00963	1	0	0	1	1	0	0	0	0	0	1	0	0	0	0	0	0	0	0	0	1	0	0	3	0	1	0	0	0	1	0	0	0	0	0	0	0	0	0	1	0	0	0	0	0	0	1	0	0
Otu00964	0	0	0	0	0	0	0	0	1	0	1	0	0	0	0	0	0	0	0	0	0	0	0	0	1	2	0	0	0	1	1	0	0	0	0	1	0	3	0	0	1	0	0	0	0	0	0	0	1
Otu00965	0	0	0	0	0	0	0	0	0	0	0	0	0	0	0	0	0	0	0	0	1	1	1	0	0	3	0	0	0	0	0	0	0	0	0	1	0	0	0	0	0	1	1	0	0	0	1	0	3
Otu00966	0	0	0	0	0	1	1	0	0	0	0	0	0	0	0	0	0	0	0	0	1	0	0	0	0	1	0	0	1	0	0	0	0	0	0	2	0	0	0	0	1	0	0	0	0	0	0	0	2
Otu00967	1	0	0	0	0	0	0	0	0	1	0	1	0	0	1	0	0	1	1	0	0	0	0	0	0	0	0	0	0	0	0	0	0	0	0	0	0	0	0	0	0	0	0	1	1	0	1	0	2
Otu00968	0	2	1	0	0	0	0	1	0	0	1	1	0	0	2	0	1	1	0	0	0	0	0	1	0	0	0	0	0	0	0	0	0	0	0	0	0	0	0	0	2	0	2	0	1	0	1	1	0
Otu00969	0	0	0	0	0	0	0	0	0	0	0	1	0	0	0	0	0	0	0	0	1	0	0	0	0	0	0	1	1	1	0	0	0	0	0	1	0	0	0	0	0	0	0	0	0	0	0	0	0
Otu00970	0	0	0	0	0	1	1	0	0	0	0	0	0	0	0	1	0	0	0	0	0	1	2	0	1	3	0	0	0	0	1	0	0	0	0	0	0	0	0	1	0	0	0	0	0	0	0	0	0
Otu00971	0	0	2	1	0	1	2	0	1	2	0	0	0	0	0	0	0	0	0	0	1	0	0	0	0	0	0	0	0	0	0	0	0	0	0	0	0	0	0	0	0	0	0	0	1	0	1	1	0
Otu00972	0	0	0	0	0	0	0	0	0	0	0	0	0	1	0	0	0	0	1	0	0	0	0	1	1	0	0	0	0	0	1	1	0	0	1	0	0	1	0	0	0	0	1	0	0	0	0	0	0
Otu00973	0	0	1	0	0	0	0	0	0	1	0	0	0	0	1	1	2	1	0	0	0	0	1	1	0	0	0	0	0	0	0	0	0	0	0	0	0	0	1	0	0	0	0	0	0	0	0	1	0
Otu00974	0	0	0	0	0	0	0	0	0	0	0	1	0	0	0	1	3	1	0	0	1	1	0	0	0	1	0	0	0	1	0	0	0	0	0	0	0	0	0	0	0	0	0	0	0	1	0	0	0
Otu00975	0	0	0	0	0	0	0	0	0	0	0	0	0	0	0	0	2	2	0	0	0	0	0	0	2	0	1	0	0	0	0	0	0	1	0	0	0	2	0	1	0	0	0	1	1	0	0	0	0
Otu00976	0	0	0	0	0	0	0	0	0	0	0	0	0	0	0	0	1	0	0	0	0	0	0	0	0	0	0	1	0	0	0	0	0	0	0	0	0	0	0	0	0	0	0	1	0	1	0	0	0
Otu00977	0	0	0	0	0	0	0	1	0	0	1	0	0	0	1	1	1	0	1	1	0	0	0	0	0	0	1	0	1	0	0	2	2	1	2	0	0	0	0	1	0	0	0	0	0	0	0	0	0
Otu00978	0	0	0	0	0	1	0	0	0	1	1	0	0	1	0	0	0	0	0	0	0	1	0	0	0	0	0	0	0	0	0	0	0	0	0	2	0	1	0	0	0	1	1	0	0	0	1	2	0
Otu00979	0	0	1	0	0	1	0	0	0	0	0	0	2	0	0	0	0	0	0	0	0	1	0	0	0	0	0	0	1	0	1	0	1	0	1	0	1	1	0	0	1	0	0	0	0	0	0	0	0
Otu00980	0	0	0	0	0	0	0	0	0	0	0	0	0	1	0	0	0	0	0	0	0	0	0	0	0	0	0	1	0	1	0	0	0	0	0	0	0	0	0	0	0	0	0	0	0	0	0	0	0
Otu00981	0	0	0	0	0	1	0	0	0	0	0	0	0	0	0	0	0	0	0	2	0	0	0	1	0	0	0	0	0	0	0	0	0	0	0	1	3	0	0	0	0	0	1	0	1	1	1	0	0
Otu00982	0	0	0	0	0	0	1	0	0	0	0	0	0	0	0	0	0	0	0	0	1	2	1	1	1	0	0	0	0	0	0	0	0	0	0	0	0	1	0	0	0	0	0	1	0	0	1	0	0
Otu00983	0	0	0	0	0	0	0	0	1	0	0	0	0	0	0	0	0	0	0	0	0	0	0	0	0	0	0	0	0	0	0	0	0	0	0	0	0	0	1	1	0	2	0	2	1	4	0	2	0
Otu00984	0	0	0	0	0	0	0	0	0	1	0	0	0	0	0	0	0	0	0	1	0	0	0	0	0	1	0	0	0	0	0	0	1	1	2	0	0	2	0	0	0	1	0	0	0	1	0	0	1
Otu00985	0	0	0	0	0	0	0	0	0	0	0	0	0	0	0	0	0	0	0	0	0	0	0	1	0	1	0	0	0	0	0	0	0	0	0	0	0	1	0	0	0	0	0	0	0	0	0	1	0
Otu00986	0	0	0	0	1	0	0	0	0	0	0	0	0	1	0	0	0	0	0	0	0	0	0	0	2	0	0	0	0	0	0	0	0	0	0	0	1	1	0	0	0	0	0	0	0	2	0	0	1
Otu00987	0	0	0	0	0	0	0	0	0	0	0	0	0	0	0	0	0	0	0	0	1	0	2	1	0	1	0	0	0	0	0	0	0	0	0	0	0	0	1	1	1	0	0	2	1	1	0	0	0
Otu00988	0	0	0	0	1	0	0	0	1	1	1	0	0	1	0	0	0	0	0	0	0	0	0	0	0	0	1	0	1	0	0	0	0	1	0	0	0	1	0	0	0	0	0	0	0	0	0	0	1
Otu00989	0	0	1	0	0	0	0	0	0	1	0	0	0	0	0	0	0	0	0	0	0	0	0	0	0	0	0	0	1	1	0	0	0	0	0	0	0	0	0	0	0	0	1	0	0	0	0	0	0
Otu00990	0	0	0	0	0	0	0	0	0	0	0	0	0	0	0	0	0	0	0	0	0	0	0	0	0	0	0	0	0	0	0	0	0	0	0	0	0	0	0	0	0	0	0	0	0	0	0	0	0
Otu00991	0	1	0	0	0	0	1	0	0	1	0	0	0	0	0	0	0	0	0	0	0	0	0	0	0	0	0	0	1	1	0	2	0	0	0	1	1	3	0	0	0	0	0	0	0	0	0	0	0
Otu00992	0	0	0	0	0	0	0	1	0	1	0	0	1	0	0	1	1	1	0	1	0	0	0	0	0	0	1	1	0	1	2	2	0	2	1	1	0	0	0	0	0	0	0	0	0	0	0	0	0
Otu00993	0	0	0	0	0	0	0	0	1	0	0	0	0	0	0	2	1	1	0	0	0	0	0	0	1	0	0	1	1	1	1	1	1	0	2	1	1	0	0	0	0	0	0	0	0	0	0	0	0
Otu00994	0	0	0	0	0	0	0	1	0	0	0	0	0	0	1	0	2	0	0	0	0	0	0	0	0	0	0	0	0	0	0	0	0	0	0	1	0	0	0	0	1	0	0	0	0	1	0	0	1
Otu00995	0	1	0	0	0	0	0	0	0	0	0	0	0	0	0	0	1	0	0	0	0	0	1	0	0	0	0	0	0	0	0	1	0	1	0	0	0	0	0	0	1	0	0	1	0	0	0	0	1
Otu00996	0	0	0	0	0	0	0	0	0	0	0	0	0	0	0	0	0	0	0	0	0	0	1	0	0	0	0	0	0	1	0	0	0	0	0	0	0	0	0	0	0	0	0	1	0	0	0	0	0
Otu00997	0	0	0	0	0	3	1	0	0	0	0	1	1	0	0	0	0	0	0	0	0	1	0	0	0	0	0	0	1	0	0	0	0	0	0	0	0	0	0	0	1	0	0	1	1	0	0	0	0
Otu00998	0	0	0	1	0	0	1	0	0	0	0	0	1	0	0	0	0	0	0	1	0	0	1	1	1	0	1	0	0	1	0	0	0	1	0	1	0	0	0	0	0	0	1	0	0	0	0	0	1
Otu00999	0	0	0	0	0	0	0	0	0	0	0	0	0	0	0	0	0	0	0	0	0	0	0	1	1	0	0	0	0	0	0	2	0	0	1	0	1	1	0	0	0	0	0	0	0	0	0	0	0
Otu01000	0	0	0	0	0	0	0	1	0	0	0	0	0	0	0	0	0	0	0	0	1	0	0	0	0	0	0	0	0	0	0	1	1	0	0	0	0	0	0	0	0	0	0	0	0	0	1	0	0
Otu01001	0	0	1	1	0	0	0	0	0	0	0	1	0	0	0	0	0	0	1	1	0	1	0	0	0	0	0	0	0	0	0	0	0	0	0	0	0	1	0	0	0	0	0	0	0	0	0	0	0
Otu01002	0	0	0	0	0	1	1	2	1	0	0	3	0	1	0	1	0	1	0	0	0	1	0	0	0	0	0	0	0	0	0	0	0	0	0	0	0	0	0	0	0	0	1	1	0	0	0	0	0
Otu01003	0	0	0	0	0	0	0	0	0	0	1	0	0	0	0	0	0	0	2	0	0	0	0	0	0	0	0	3	0	1	0	0	0	3	0	1	0	0	0	0	0	0	0	0	0	0	0	0	0
Otu01004	0	0	1	0	0	0	0	1	1	0	0	0	0	0	1	0	0	0	0	0	0	0	0	0	0	0	0	0	0	0	0	0	1	0	0	0	0	0	0	0	0	0	0	0	1	0	1	0	1
Otu01005	0	0	0	0	0	0	0	1	0	0	0	0	0	0	0	0	0	0	0	0	0	0	0	0	0	0	0	0	1	0	0	0	0	0	1	0	0	0	0	1	0	0	0	0	0	0	0	0	0
Otu01006	0	0	0	0	0	0	1	1	1	1	2	1	0	0	2	1	1	1	0	2	0	0	0	0	0	0	0	0	0	0	0	0	0	0	0	0	0	0	0	0	0	0	1	1	0	0	0	0	0
Otu01007	0	1	0	0	1	0	1	1	0	0	0	0	0	1	0	0	0	0	1	0	0	3	0	0	0	0	0	0	0	0	0	0	0	0	0	1	0	0	0	0	0	0	0	0	0	0	0	0	0
Otu01008	1	0	0	0	0	2	0	0	0	1	0	0	1	0	0	1	0	0	0	0	0	0	0	0	0	0	0	0	0	0	0	0	0	0	0	0	0	0	0	0	0	0	0	0	0	1	2	0	0
Otu01009	0	0	0	0	0	0	0	0	0	0	0	0	0	0	0	0	0	0	0	0	0	0	0	0	0	0	0	0	0	0	1	1	0	1	0	3	1	0	0	0	0	0	0	0	0	1	1	1	0
Otu01010	1	0	0	1	0	0	1	0	0	0	0	0	0	0	0	0	0	0	0	1	0	0	0	0	0	0	0	1	2	0	0	0	3	0	1	0	0	0	0	0	0	0	0	0	0	0	2	0	0
Otu01011	0	0	1	0	1	1	0	0	0	0	0	0	0	0	0	0	1	0	0	1	0	0	0	0	0	0	2	1	0	0	3	0	1	0	2	0	1	0	0	1	0	0	0	0	0	0	0	0	0
Otu01012	1	0	0	0	1	2	1	0	0	0	0	0	0	1	0	1	0	0	0	0	0	0	2	0	0	0	0	1	0	0	0	0	0	0	0	0	0	0	0	0	1	0	0	0	1	0	0	0	0
Otu01013	0	0	0	0	0	0	0	0	1	0	0	0	0	0	1	0	0	0	0	1	0	0	0	0	0	0	0	0	0	0	1	0	1	0	0	1	0	1	0	0	0	0	0	1	0	1	0	0	0
Otu01014	0	0	0	1	1	0	0	0	0	1	0	0	0	0	0	0	0	0	1	0	1	0	0	0	0	0	0	0	0	0	0	0	0	0	0	1	0	0	0	0	0	0	0	0	0	1	0	0	0
Otu01015	0	0	0	0	0	0	0	0	0	0	0	1	0	0	0	0	0	0	0	0	1	0	0	1	0	1	1	0	0	0	0	0	1	0	0	0	0	0	0	0	0	0	0	0	0	0	0	0	2
Otu01016	0	0	0	0	0	0	0	0	1	1	0	0	2	1	0	0	0	0	0	0	0	0	0	0	0	0	1	1	0	0	0	0	0	0	1	1	0	0	1	0	0	1	0	0	0	0	0	0	0
Otu01017	0	1	0	0	1	0	1	1	1	0	1	1	1	0	0	1	1	0	0	1	0	0	0	0	0	0	0	1	0	1	0	0	1	0	0	0	0	0	0	0	0	0	0	0	0	0	0	0	0
Otu01018	0	0	0	0	1	0	1	0	1	0	0	0	0	0	0	0	0	0	0	0	0	0	0	0	0	1	0	0	0	0	0	0	1	0	0	0	0	0	0	0	1	0	0	0	0	0	0	0	1
Otu01019	0	1	0	0	0	0	0	0	0	0	0	0	0	0	0	0	0	0	0	0	0	0	0	0	0	0	0	2	0	1	0	0	0	0	0	0	0	0	1	0	1	0	0	0	0	0	0	0	0
Otu01020	0	0	0	0	0	0	0	0	0	0	0	0	0	0	0	0	0	0	0	0	0	0	0	0	1	0	0	0	0	0	0	0	0	0	1	0	0	1	0	0	0	0	0	0	0	0	0	0	0
Otu01021	0	0	0	0	0	0	0	0	0	0	0	0	0	0	0	0	0	1	0	1	1	0	0	0	1	0	0	0	0	0	0	0	0	0	0	0	0	0	0	0	0	1	0	1	0	0	0	1	1
Otu01022	0	0	0	0	0	0	0	0	0	0	0	0	1	0	0	1	0	0	0	0	0	1	0	0	0	0	0	0	1	0	0	0	0	0	0	0	0	0	0	1	0	1	0	2	1	0	0	0	0
Otu01023	0	1	0	0	2	0	0	1	0	0	0	0	0	1	1	0	0	0	0	0	0	0	0	0	1	0	0	0	0	0	0	0	1	0	0	0	0	0	0	0	0	0	0	0	0	0	0	0	0
Otu01024	1	0	0	0	0	0	0	0	0	0	0	0	0	0	0	0	0	0	0	0	0	0	0	0	0	0	0	1	0	0	2	1	0	0	0	0	0	0	0	0	0	0	0	0	0	0	0	0	0
Otu01025	0	0	0	0	0	0	1	0	0	0	0	0	0	0	0	0	0	0	0	0	0	0	0	0	0	0	0	0	0	0	0	0	0	0	0	0	0	0	0	0	1	0	1	1	0	0	0	0	0
Otu01026	0	0	0	0	0	1	0	0	0	0	0	1	0	0	0	1	1	0	0	0	0	0	0	0	0	0	0	0	1	0	0	0	1	0	0	0	0	0	0	2	1	0	0	0	0	0	1	0	1
Otu01027	0	0	0	0	0	0	0	0	0	0	0	0	0	0	0	0	1	0	0	0	0	0	0	0	0	0	1	0	0	1	0	0	0	0	0	0	0	0	0	0	0	0	0	0	0	0	0	1	0
Otu01028	1	0	0	1	0	0	0	0	0	0	1	0	0	2	2	0	0	1	2	2	0	0	2	0	1	0	1	0	0	0	0	0	0	0	0	0	0	0	0	0	0	0	0	0	0	0	0	0	0
Otu01029	0	0	0	0	0	0	0	0	0	0	0	0	0	1	0	0	0	0	0	0	0	0	0	0	0	0	1	0	1	0	0	1	0	0	1	0	0	0	0	0	0	0	0	0	0	0	1	0	0
Otu01030	0	0	0	0	0	0	0	0	0	0	0	0	0	0	0	0	0	0	0	0	0	1	0	1	0	0	0	0	0	0	0	0	0	1	0	0	0	1	0	1	0	0	1	0	1	0	1	1	0
Otu01031	0	0	0	0	0	0	0	0	0	0	0	0	0	0	0	0	0	0	0	0	0	0	0	0	0	0	0	0	0	0	0	0	0	0	0	0	0	0	0	2	2	3	0	0	2	0	1	1	0
Otu01032	0	0	1	1	0	0	0	0	0	0	0	0	0	0	0	0	0	0	1	0	0	0	0	0	1	0	0	0	0	0	0	0	0	0	0	0	0	1	0	0	0	1	0	0	0	0	0	0	1
Otu01033	0	0	1	0	1	0	0	1	0	0	0	0	1	0	1	0	0	0	2	1	1	0	0	1	0	0	0	0	0	0	0	0	0	0	0	0	0	0	1	0	0	0	1	0	1	0	0	0	0
Otu01034	0	2	0	0	0	0	1	0	0	0	0	0	0	0	0	0	0	0	0	0	1	0	0	0	0	0	0	0	0	0	0	0	0	2	1	0	0	0	0	1	0	0	0	1	0	0	0	2	0
Otu01035	0	2	0	0	0	1	1	0	1	0	0	0	0	1	0	0	0	0	0	0	0	0	0	0	0	0	0	0	0	0	0	0	0	0	0	0	0	0	0	1	5	0	0	0	1	0	0	0	0
Otu01036	0	0	1	0	0	0	0	0	1	1	0	0	0	1	0	0	1	0	0	0	0	0	0	0	0	0	0	2	0	0	0	0	0	0	1	0	0	0	1	0	0	0	0	0	1	0	0	0	1
Otu01037	0	0	1	0	1	0	1	0	0	0	0	0	2	1	0	0	0	1	0	1	0	0	0	0	0	0	0	0	0	0	0	0	0	0	0	1	0	0	0	0	1	1	0	0	0	1	0	0	0
Otu01038	0	1	2	0	0	1	1	1	1	0	0	0	0	0	0	0	2	0	1	0	1	0	0	0	0	0	0	0	0	0	1	0	0	0	0	0	0	0	0	1	0	0	1	0	0	0	0	0	0
Otu01039	0	0	0	0	0	0	0	0	0	1	0	0	0	1	0	0	0	0	0	0	0	0	0	1	0	0	0	0	1	0	0	0	0	0	0	0	0	0	0	0	1	0	1	1	1	0	0	0	0
Otu01040	0	0	0	0	0	0	0	0	0	0	0	0	0	0	0	0	0	0	0	0	1	4	2	1	2	1	0	0	0	0	0	0	0	0	0	0	0	0	0	0	0	0	0	0	0	0	0	0	1
Otu01041	0	0	0	0	0	1	0	0	0	0	0	0	0	0	0	1	0	0	0	0	0	0	0	0	0	0	0	0	0	0	0	0	0	0	0	0	0	0	0	0	1	0	0	0	2	0	1	0	1
Otu01042	0	2	0	0	0	1	0	0	0	0	0	0	1	0	0	0	0	0	0	0	0	0	0	0	0	0	0	0	0	0	0	0	0	0	0	0	0	0	0	0	0	0	0	0	0	0	0	0	0
Otu01043	0	0	0	0	0	0	0	0	0	0	0	0	0	1	1	0	0	0	0	0	1	1	0	1	0	0	0	0	0	0	0	0	0	0	0	0	0	0	0	0	0	0	0	1	1	1	1	0	0
Otu01044	1	0	0	0	0	0	0	0	0	0	1	0	0	0	0	0	0	0	0	0	0	0	0	0	0	0	0	0	0	0	0	0	0	0	0	0	0	0	1	0	1	2	3	0	1	0	1	1	1
Otu01045	0	1	0	0	1	0	1	0	0	0	0	0	0	0	0	0	0	1	0	0	0	0	1	0	0	0	0	0	0	1	1	0	0	0	0	0	0	0	1	1	0	1	0	0	0	2	0	0	0
Otu01046	0	0	0	0	0	0	0	1	0	0	0	0	0	0	0	0	0	0	0	0	0	0	0	1	0	0	0	0	0	0	0	0	0	0	0	0	0	0	1	2	1	2	2	2	1	0	0	0	2
Otu01047	0	1	0	0	0	0	0	0	1	0	0	0	0	0	0	0	1	0	0	0	0	0	0	0	0	1	0	0	0	2	0	0	0	0	0	0	0	0	0	1	0	1	0	0	0	1	0	1	0
Otu01048	0	1	0	0	1	0	0	1	1	0	0	0	0	1	0	0	0	0	0	0	0	0	0	0	0	0	0	1	0	0	0	0	0	0	1	0	0	0	0	0	0	0	0	1	0	0	0	0	0
Otu01049	0	0	0	0	1	1	0	0	0	0	0	0	0	0	0	0	0	0	0	1	0	0	0	0	1	0	2	0	2	0	1	0	0	0	0	0	0	2	0	0	0	1	0	0	0	0	0	0	0
Otu01050	0	0	0	1	1	0	1	1	0	0	0	0	0	0	0	0	1	0	0	1	0	0	0	0	0	1	0	0	0	0	0	0	0	0	0	0	1	0	0	0	0	0	1	0	0	0	0	1	1
Otu01051	0	0	0	0	1	0	0	0	1	1	1	0	1	0	0	0	0	0	0	0	3	1	1	1	0	0	0	0	0	0	0	0	0	0	0	0	0	1	0	0	0	0	1	0	0	0	0	1	1
Otu01052	0	0	0	0	0	0	0	0	0	1	0	0	0	0	0	0	2	0	0	2	0	0	0	1	0	0	0	0	0	0	0	0	2	0	0	0	0	0	0	0	0	0	0	0	0	0	0	0	0
Otu01053	0	0	0	0	0	0	0	0	1	0	1	0	0	0	0	0	0	1	0	0	0	0	0	0	0	3	0	0	0	0	0	0	2	0	0	0	0	0	0	0	0	1	0	0	0	0	0	0	1
Otu01054	0	0	0	0	0	0	0	1	0	0	0	0	0	1	0	0	0	1	0	0	0	0	0	0	0	0	2	0	0	1	0	1	0	0	0	0	1	0	2	0	0	0	0	0	0	2	1	0	0
Otu01055	0	0	0	0	0	0	0	0	0	0	0	0	0	0	0	0	0	0	0	0	0	0	0	0	0	1	0	1	0	1	0	0	0	0	0	0	0	0	0	0	0	0	0	0	0	1	0	0	0
Otu01056	0	0	0	0	0	0	0	0	0	0	0	0	0	0	0	0	0	1	0	0	0	0	0	0	0	0	0	0	2	2	1	0	0	1	0	0	1	0	0	0	0	0	0	0	0	1	0	0	0
Otu01057	0	0	0	0	1	0	1	0	1	0	0	0	0	0	0	0	0	0	0	0	0	0	0	0	0	1	1	0	0	1	0	1	0	0	0	1	2	0	0	0	0	0	0	0	0	0	0	0	0
Otu01058	0	0	1	0	0	2	0	0	0	0	0	0	0	0	0	0	0	1	0	0	0	0	0	1	0	0	0	0	0	0	0	0	0	1	0	0	0	0	0	0	1	0	0	0	0	0	0	0	1
Otu01059	0	0	0	0	1	0	0	0	0	0	1	0	0	0	1	0	0	0	0	2	0	1	0	0	0	0	1	0	2	1	0	1	0	1	0	0	0	0	0	0	0	0	0	0	0	0	0	0	1
Otu01060	0	0	1	0	0	0	0	0	1	0	0	0	0	0	0	1	0	2	0	0	0	0	0	0	0	0	0	1	0	1	1	2	0	1	0	1	1	0	0	0	0	1	0	0	0	0	0	0	0
Otu01061	0	0	0	2	0	0	1	0	1	0	0	0	2	0	0	0	1	0	0	0	0	0	0	0	0	0	0	0	0	0	0	0	0	0	0	0	0	0	1	0	0	0	0	0	0	0	0	0	0
Otu01062	0	0	0	0	0	0	0	0	0	0	0	0	0	1	0	0	0	0	0	0	1	0	0	1	0	0	0	0	0	0	0	0	0	0	0	2	0	0	0	0	0	0	0	0	2	0	1	0	0
Otu01063	0	0	0	0	0	0	1	0	0	0	0	0	0	0	0	0	0	0	0	0	0	0	1	1	1	0	0	0	0	0	0	0	0	0	0	0	0	1	0	0	0	0	0	1	0	0	0	0	1
Otu01064	0	0	1	0	0	0	0	0	0	0	0	0	0	0	0	0	0	0	0	0	0	0	0	2	0	1	0	0	0	1	1	0	0	0	1	0	0	0	0	0	0	0	0	0	1	2	0	0	0
Otu01065	0	0	0	0	0	0	0	0	0	0	0	0	0	0	0	0	1	0	0	0	1	0	2	0	1	0	0	0	0	0	1	0	0	0	0	0	0	1	0	0	0	0	0	0	0	0	0	0	0
Otu01066	0	0	0	1	0	1	0	0	0	0	1	0	0	0	1	0	0	0	0	0	0	0	0	0	0	0	0	0	0	0	2	0	0	0	1	0	1	0	0	1	0	1	1	0	0	0	1	0	0
Otu01067	0	0	0	2	1	0	0	0	2	0	0	0	0	0	0	0	0	0	0	0	0	0	0	0	0	0	2	1	0	0	0	0	0	0	0	0	0	0	1	0	0	0	0	0	0	0	0	0	0
Otu01068	0	0	0	0	1	0	0	0	1	0	0	0	0	0	0	0	0	2	0	1	0	0	0	0	0	0	0	1	0	0	1	0	0	0	0	0	0	0	1	1	0	1	1	0	0	0	0	0	0
Otu01069	0	0	3	0	0	0	0	0	0	0	0	0	0	1	1	0	0	0	0	0	0	0	0	0	0	0	0	0	0	0	0	0	0	0	0	0	0	0	0	0	0	0	0	1	0	0	0	0	0
Otu01070	0	1	0	0	0	0	1	1	0	0	0	0	1	1	0	0	0	0	1	4	0	0	0	0	0	1	0	0	0	0	0	0	0	1	0	0	0	0	0	0	0	0	0	0	0	1	0	0	0
Otu01071	0	0	0	0	1	0	0	1	0	0	1	0	0	0	0	1	0	0	0	0	0	0	0	0	0	0	0	0	0	0	0	0	0	0	0	0	0	0	0	0	2	0	0	1	0	1	0	0	0
Otu01072	0	0	0	0	0	0	0	1	0	0	0	1	0	0	1	0	2	0	0	0	0	0	0	0	0	1	0	0	0	1	0	0	0	0	0	0	0	0	0	0	0	1	0	0	0	0	0	1	1
Otu01073	1	0	0	1	0	0	0	0	0	0	0	1	0	0	0	0	0	0	0	0	0	0	0	0	0	0	0	0	0	0	0	0	0	0	0	0	0	0	1	1	0	0	0	0	0	0	3	0	0
Otu01074	0	0	0	0	0	0	0	0	2	0	0	0	0	1	0	1	0	0	0	0	0	0	0	0	0	0	0	0	0	0	0	0	0	0	0	1	1	0	0	1	0	0	0	0	1	0	1	1	0
Otu01075	0	0	0	0	0	2	0	0	0	0	0	0	0	1	0	0	1	0	0	1	0	0	0	0	0	1	0	0	0	0	0	0	0	1	0	0	0	0	0	1	1	3	0	0	0	0	0	0	0
Otu01076	0	0	0	0	0	0	0	1	0	0	0	0	0	0	0	0	0	0	0	1	0	0	0	0	1	0	0	0	0	0	0	0	0	0	1	2	0	0	0	0	0	0	1	0	0	1	0	0	0
Otu01077	0	0	0	0	0	0	0	0	0	0	0	0	0	0	0	0	0	0	0	0	0	0	0	0	0	0	0	1	0	0	1	0	0	2	0	0	0	0	0	0	0	0	0	0	0	0	0	0	0
Otu01078	0	1	0	1	0	0	1	1	1	0	0	1	0	0	0	0	1	0	1	0	0	0	0	1	0	0	0	0	0	0	0	0	0	0	0	0	0	0	0	0	0	0	0	0	0	0	1	0	0
Otu01079	0	0	0	0	2	0	0	0	0	0	0	0	1	0	0	0	0	1	0	0	0	0	0	0	0	0	1	0	0	1	0	0	0	0	0	0	0	0	0	0	0	0	0	1	0	0	1	0	0
Otu01080	0	0	1	0	0	0	0	1	0	0	0	0	0	0	1	0	0	1	0	0	1	0	0	0	0	0	0	0	0	0	1	1	0	1	0	0	2	0	0	0	0	0	0	0	0	1	0	0	0
Otu01081	1	0	1	0	0	0	0	0	0	0	1	0	0	0	0	0	0	0	1	0	0	0	0	0	0	0	1	3	1	0	1	0	0	0	0	1	0	0	0	0	0	2	0	0	0	0	0	0	0
Otu01082	0	0	0	1	0	0	0	0	0	0	0	0	0	0	1	0	0	1	1	0	0	0	0	0	0	0	0	0	0	0	0	0	0	0	0	0	0	0	0	0	0	0	1	0	0	0	0	0	0
Otu01083	0	0	0	1	0	0	1	0	0	0	0	1	2	0	0	0	0	0	0	1	0	0	0	0	0	0	0	0	0	0	0	0	0	1	0	0	0	0	1	0	2	1	1	0	0	1	0	0	0
Otu01084	0	0	0	0	0	1	0	0	0	0	0	0	1	0	0	0	0	0	0	0	0	0	0	0	0	0	0	0	0	0	0	0	0	0	0	0	0	0	0	0	0	0	1	0	0	0	0	1	1
Otu01085	0	1	0	0	0	0	0	0	0	0	1	0	2	0	0	0	0	0	0	0	0	0	0	0	2	0	0	0	0	0	0	0	0	0	0	0	0	0	0	0	0	0	0	0	0	0	1	0	0
Otu01086	0	1	0	1	1	0	0	0	0	1	0	1	0	0	0	0	0	0	0	0	0	0	0	0	0	0	0	0	0	0	0	0	0	0	0	0	0	0	0	0	1	1	0	0	0	0	0	0	0
Otu01087	0	0	0	0	0	0	0	0	0	0	0	0	0	0	0	0	0	0	0	1	1	0	0	0	0	0	0	0	0	1	0	1	0	0	0	0	1	0	0	0	0	0	0	2	1	1	0	1	0
Otu01088	0	0	0	0	0	0	0	0	0	0	1	1	0	0	0	0	0	0	1	0	1	0	0	0	0	0	0	0	1	0	1	0	0	0	0	0	0	0	0	0	0	0	0	0	1	0	0	0	0
Otu01089	0	0	0	0	0	0	0	0	0	0	0	0	0	0	0	0	0	0	0	0	0	0	0	0	0	0	0	1	0	0	0	1	0	0	0	0	0	0	0	1	0	0	1	0	1	0	0	0	0
Otu01090	0	0	0	0	0	0	0	0	1	0	0	0	0	0	0	0	0	0	0	0	0	0	0	0	0	0	0	1	0	0	1	1	0	0	0	0	0	0	0	0	0	1	1	0	0	0	0	0	0
Otu01091	0	0	0	0	1	0	0	0	0	0	0	0	0	0	0	0	1	0	0	0	0	0	0	0	0	0	0	0	0	1	0	0	0	0	1	0	0	0	0	0	0	0	0	0	0	0	0	0	0
Otu01092	0	0	1	0	0	0	0	0	2	0	2	1	2	0	0	1	0	1	0	0	0	1	0	0	0	0	0	0	0	0	0	1	0	1	0	0	0	0	0	0	0	0	0	0	0	1	0	0	0
Otu01093	0	0	0	0	0	0	1	0	0	1	0	0	0	0	0	0	0	0	0	2	0	0	0	0	0	0	1	1	3	0	1	0	0	0	0	0	1	0	0	0	0	0	0	0	0	0	2	0	0
Otu01094	0	0	0	0	0	0	0	0	0	0	0	0	0	0	0	0	0	0	1	1	0	2	0	0	0	3	0	0	0	0	0	0	0	0	1	1	0	0	1	0	0	0	1	0	1	0	1	0	0
Otu01095	0	0	1	0	0	0	0	0	0	0	1	0	0	0	0	0	0	1	0	0	0	0	0	0	0	0	1	0	1	2	0	0	0	0	0	0	0	0	1	0	0	0	0	0	0	1	0	0	0
Otu01096	0	0	0	0	0	0	0	0	0	0	0	0	0	0	0	0	0	0	0	0	0	0	0	0	0	0	0	0	0	0	0	0	0	0	0	0	0	0	0	0	0	0	0	0	0	0	0	0	0
Otu01097	0	0	0	0	0	1	0	0	0	0	0	0	0	1	0	0	1	0	0	0	0	1	0	0	1	0	0	1	0	1	0	1	0	1	0	0	0	0	0	0	0	0	0	0	0	0	0	0	0
Otu01098	0	0	0	0	0	0	1	1	1	0	0	0	0	0	1	1	0	1	0	0	0	0	0	0	0	0	0	1	0	1	0	1	0	0	0	0	0	0	0	0	0	0	0	0	0	0	0	0	0
Otu01099	0	0	0	0	0	0	0	0	0	0	0	1	0	0	0	1	0	0	0	0	0	0	0	0	0	0	0	0	0	0	0	0	1	0	1	0	1	0	0	0	2	0	0	0	0	0	0	1	0
Otu01100	0	0	0	0	0	0	0	0	0	0	0	0	0	0	1	0	0	0	0	1	0	0	1	0	0	1	0	0	1	0	0	0	0	1	0	1	0	1	0	0	0	0	0	0	0	0	0	1	0
Otu01101	0	0	0	0	0	2	1	0	1	0	1	0	1	0	0	2	0	0	0	0	0	0	0	0	0	0	0	0	0	1	0	0	0	0	0	0	0	0	0	0	0	0	0	0	0	0	0	0	1
Otu01102	2	0	0	0	1	0	0	0	1	0	0	0	0	0	0	0	0	0	0	1	0	0	1	0	0	1	0	0	0	0	2	0	1	1	1	1	0	0	1	0	0	0	0	0	0	0	0	0	0
Otu01103	0	0	0	0	1	0	1	0	0	2	0	0	3	0	0	0	0	0	2	0	0	0	1	1	0	0	0	1	0	0	0	0	0	0	0	0	0	0	0	1	0	0	0	0	0	0	0	0	0
Otu01104	0	0	0	1	0	1	0	1	0	0	0	0	0	1	0	0	0	0	0	0	0	0	0	1	0	0	0	1	0	1	0	0	0	0	1	0	1	0	0	1	0	0	0	1	0	0	0	0	0
Otu01105	0	0	0	0	0	0	0	0	0	0	0	0	0	0	0	0	2	0	0	0	0	1	1	0	0	0	0	0	0	0	0	0	1	0	0	0	0	0	0	0	1	1	0	0	0	0	0	2	1
Otu01106	0	0	0	0	0	0	0	0	0	1	0	0	0	0	0	0	0	0	0	0	0	0	0	0	0	0	0	0	0	0	0	0	0	0	0	0	0	0	0	1	0	0	1	1	0	2	1	0	0
Otu01107	0	1	0	0	0	0	0	0	0	0	0	0	0	0	0	0	0	0	0	0	1	1	0	0	0	1	0	0	0	0	0	0	0	0	0	0	1	0	0	0	0	0	0	0	0	0	0	0	0
Otu01108	0	0	0	1	0	0	0	0	1	0	2	0	1	0	0	0	0	1	0	0	0	0	1	0	0	0	0	0	4	1	1	1	0	0	0	0	0	0	0	0	0	0	0	0	0	0	0	0	1
Otu01109	1	1	0	0	0	0	0	0	0	0	2	0	0	0	0	1	0	0	3	0	0	0	0	0	0	0	1	1	0	0	0	0	1	0	0	0	0	0	0	0	0	0	0	0	0	0	0	0	0
Otu01110	2	0	0	0	0	0	0	0	0	0	0	0	0	0	0	0	0	0	0	0	0	0	0	0	0	0	0	1	1	0	1	0	1	3	0	1	0	0	0	0	1	0	0	0	0	1	1	0	0
Otu01111	0	0	0	0	0	0	0	1	0	0	0	0	1	0	0	0	0	0	1	0	0	0	0	0	0	0	0	0	0	0	0	0	0	1	0	0	0	0	0	0	3	0	1	1	0	0	0	0	0
Otu01112	0	1	0	0	0	1	0	0	0	1	0	0	1	0	0	0	1	1	0	1	0	2	0	1	0	0	0	0	0	0	0	0	0	0	0	0	0	0	0	0	0	0	0	0	0	0	0	0	0
Otu01113	0	1	0	0	0	1	0	0	0	0	0	0	0	0	1	0	0	0	0	0	0	0	0	0	0	0	0	1	0	1	0	1	0	1	1	0	0	0	0	0	1	1	0	0	0	1	0	0	0
Otu01114	0	0	0	0	0	0	0	0	0	0	1	0	1	0	0	0	0	0	1	0	1	0	1	0	0	0	0	0	0	1	0	0	0	0	0	0	1	0	0	0	0	0	0	0	1	0	0	0	1
Otu01115	0	0	0	0	0	0	0	0	0	1	0	0	0	0	0	0	0	0	0	0	0	0	0	0	0	0	0	0	0	0	0	0	0	1	0	0	0	0	0	0	0	0	0	1	1	0	0	1	1
Otu01116	1	0	1	0	0	0	0	0	0	0	0	1	0	1	0	0	0	0	0	0	0	0	0	0	0	0	0	0	1	0	1	0	1	2	0	0	0	0	0	0	0	0	0	0	0	0	0	0	0
Otu01117	0	0	0	0	0	0	0	0	0	0	0	0	0	0	0	0	0	0	1	0	0	0	0	0	0	0	1	0	0	0	0	0	0	0	0	0	0	0	0	0	0	0	0	0	0	1	0	0	0
Otu01118	0	0	0	0	0	0	0	0	0	1	0	0	0	0	0	0	1	0	0	0	0	0	0	0	0	0	0	0	0	0	0	0	0	0	0	0	0	0	0	0	0	0	0	0	0	0	0	0	0
Otu01119	0	0	1	0	0	0	0	0	0	0	0	0	0	1	1	0	0	0	0	0	0	0	0	0	0	0	0	0	0	0	1	0	0	0	0	0	0	0	1	0	1	0	0	0	0	0	0	0	0
Otu01120	0	0	0	0	0	0	0	0	0	0	0	0	0	0	1	0	0	0	0	1	0	0	0	0	0	1	0	0	0	2	0	0	0	1	0	0	0	1	0	0	0	0	0	0	0	2	0	0	1
Otu01121	0	0	0	0	0	0	0	0	0	0	0	1	0	0	1	0	1	1	0	0	0	0	0	0	0	0	0	0	0	1	0	0	0	0	0	1	0	0	1	0	0	0	0	0	0	0	2	0	2
Otu01122	0	0	0	0	0	0	0	0	0	0	0	0	0	0	0	0	0	0	0	0	0	0	0	0	0	1	0	0	0	0	0	0	0	0	0	0	0	0	0	0	0	0	0	0	0	1	1	0	0
Otu01123	1	0	0	1	0	0	0	0	1	1	0	0	0	2	0	0	0	0	0	0	0	0	0	0	0	0	0	0	0	0	0	1	0	0	0	0	0	1	0	0	0	1	0	0	0	0	0	0	0
Otu01124	0	0	0	1	0	0	0	1	1	0	0	0	0	1	0	0	0	0	0	1	0	0	0	0	0	1	0	0	0	0	0	0	1	0	0	0	0	1	0	0	0	0	0	0	0	0	0	0	1
Otu01125	0	0	0	0	0	0	0	0	0	0	0	0	0	0	0	0	0	0	1	0	1	2	0	0	1	2	0	0	0	0	0	0	0	0	0	0	0	0	0	0	0	1	0	0	0	0	2	0	0
Otu01126	0	0	1	0	0	0	0	0	2	1	2	0	0	0	0	0	0	0	2	0	0	0	0	0	0	0	0	0	0	0	0	0	0	1	0	0	0	0	1	0	1	0	0	1	0	0	0	0	0
Otu01127	0	0	0	0	0	0	0	0	0	0	0	0	0	0	0	1	0	0	0	0	0	1	0	0	0	0	0	0	0	0	0	0	0	0	0	0	0	0	0	0	0	1	0	0	0	0	0	0	0
Otu01128	0	1	0	0	0	1	0	0	0	0	0	0	1	0	0	0	0	0	0	0	0	0	0	0	0	0	0	0	0	0	1	0	0	1	1	0	1	0	0	1	0	0	0	0	0	0	0	0	0
Otu01129	1	0	0	0	0	0	0	0	2	0	0	0	0	0	0	0	0	0	0	0	0	0	0	0	0	0	0	0	1	0	0	0	1	0	0	0	0	0	0	0	1	0	0	0	0	0	1	0	0
Otu01130	0	2	0	0	0	0	0	1	0	0	0	0	0	0	1	0	1	0	0	0	0	0	0	0	0	0	0	0	0	0	0	0	1	1	2	0	0	0	1	0	0	0	0	1	0	0	0	0	0
Otu01131	0	1	2	0	1	0	1	0	0	0	0	0	0	0	0	0	1	0	0	0	0	2	0	0	0	0	0	0	0	1	0	0	0	0	0	0	0	0	2	0	1	0	0	0	0	1	0	0	0
Otu01132	0	0	0	0	0	0	0	0	0	0	0	0	0	0	0	0	0	0	0	0	0	0	1	0	1	0	0	1	0	0	0	0	0	0	1	1	2	0	0	0	0	1	0	0	0	0	0	0	0
Otu01133	0	0	0	0	0	0	0	0	0	0	0	0	0	0	0	1	0	0	0	0	0	1	0	0	0	1	0	0	0	0	0	0	0	0	0	0	1	0	1	0	0	0	1	0	0	0	0	0	0
Otu01134	0	0	0	2	3	0	0	0	1	1	1	0	0	1	0	0	1	1	0	0	0	0	0	0	0	0	0	0	0	0	0	0	0	0	0	0	0	0	0	0	0	0	1	1	1	0	0	0	1
Otu01135	1	0	1	0	0	0	0	1	0	0	0	0	1	1	0	2	1	1	0	1	0	0	0	0	0	0	1	0	0	0	1	0	1	0	0	0	0	0	0	0	0	0	0	0	0	0	0	0	0
Otu01136	0	0	0	0	0	0	0	0	0	0	0	0	0	0	1	0	0	0	1	0	0	1	1	0	0	0	0	0	0	0	0	0	0	0	0	0	0	1	0	0	0	1	0	0	0	0	0	1	2
Otu01137	0	0	0	0	0	0	0	1	0	0	0	0	0	0	0	0	0	0	0	0	0	0	0	0	1	0	0	0	0	0	0	0	0	0	0	0	0	0	0	0	0	1	0	0	2	0	0	1	0
Otu01138	0	1	1	0	0	0	1	0	0	0	0	0	0	1	0	2	1	1	0	2	0	0	0	0	0	0	0	0	0	0	0	0	1	0	0	0	0	0	0	1	0	1	1	0	0	0	0	1	0
Otu01139	0	0	0	0	0	0	0	0	0	0	0	0	0	0	0	0	1	1	0	1	1	1	1	0	0	0	0	1	0	1	0	0	0	1	0	0	0	0	0	1	0	0	0	0	0	0	0	0	0
Otu01140	0	0	1	0	0	0	0	1	1	1	0	1	0	0	0	0	0	0	1	1	0	0	0	0	0	0	1	1	1	0	0	1	0	0	0	0	1	1	0	0	0	0	1	0	0	0	0	0	0
Otu01141	0	0	0	0	0	0	1	1	0	0	0	2	0	0	1	1	1	0	1	0	1	0	1	2	1	0	0	0	0	0	0	0	0	0	0	0	1	0	0	0	0	0	0	0	0	0	0	0	0
Otu01142	1	0	0	0	0	0	0	0	0	0	0	0	0	0	0	0	0	0	0	0	0	3	0	2	1	1	0	0	0	0	0	0	0	0	0	0	0	0	0	0	0	0	0	1	0	0	0	0	0
Otu01143	0	0	0	0	0	3	0	2	0	0	0	0	1	1	0	0	0	0	0	0	0	0	0	0	0	0	0	0	0	0	0	2	0	0	0	0	0	0	0	0	0	0	0	0	0	0	0	0	0
Otu01144	0	0	0	0	0	0	1	0	1	0	0	0	0	1	0	0	1	0	0	0	0	0	0	0	0	0	0	0	0	0	0	0	0	0	0	0	0	0	0	0	0	1	0	0	0	0	0	0	0
Otu01145	0	0	0	0	0	0	0	0	0	0	0	0	0	0	0	0	0	0	0	0	0	0	0	0	0	0	0	0	1	1	0	0	1	0	0	0	0	0	0	0	0	0	0	0	0	0	0	0	0
Otu01146	1	0	0	0	1	1	0	1	1	0	3	0	0	0	1	0	0	1	1	0	0	1	0	0	0	0	0	0	0	0	0	0	0	0	0	0	0	0	0	0	0	0	0	1	0	0	1	0	0
Otu01147	1	1	0	0	0	0	0	0	1	0	0	0	0	0	0	1	1	0	0	0	0	0	0	0	0	0	0	0	0	1	0	0	0	0	1	0	0	0	0	0	0	0	1	0	0	0	0	0	0
Otu01148	0	0	0	0	0	0	0	0	0	0	0	0	0	0	0	0	0	0	0	0	0	0	0	0	0	0	0	0	0	0	0	0	0	0	0	0	0	0	1	0	1	0	0	0	0	0	0	0	0
Otu01149	1	0	0	0	0	0	0	0	0	0	0	0	1	0	0	0	0	0	1	0	0	0	0	0	0	0	0	0	0	0	0	0	0	1	0	1	0	0	1	0	0	1	0	0	1	0	0	0	0
Otu01150	0	0	0	2	0	0	0	0	0	0	0	2	0	0	0	0	0	0	0	0	0	0	0	0	0	0	0	0	1	0	3	0	0	0	1	0	0	0	0	0	0	0	0	0	0	0	0	0	0
Otu01151	0	1	0	0	0	0	0	1	0	0	0	0	1	0	0	0	0	0	0	0	1	0	1	0	1	0	0	0	0	0	0	0	0	0	0	0	0	0	0	0	0	0	0	1	0	1	1	0	0
Otu01152	0	0	0	0	0	0	0	0	1	1	0	0	0	0	0	0	0	0	0	0	0	0	0	0	0	0	0	0	0	0	0	0	0	0	0	0	0	0	2	0	0	1	1	2	0	1	2	0	0
Otu01153	0	1	0	0	0	0	0	0	0	0	0	0	0	0	0	0	1	0	0	0	0	2	1	0	0	0	0	0	0	0	0	0	0	0	0	0	1	0	0	0	0	0	0	0	0	0	1	0	0
Otu01154	0	0	0	0	0	1	0	0	0	0	0	0	0	0	1	0	0	0	0	0	0	0	0	1	0	0	0	0	0	0	1	1	0	0	0	1	1	0	0	0	0	0	0	0	0	0	1	0	0
Otu01155	0	0	0	0	0	0	0	0	0	0	0	0	1	0	1	0	0	0	0	0	0	0	0	0	1	1	0	0	1	1	0	0	0	0	0	0	0	0	0	0	0	0	0	0	0	0	0	1	0
Otu01156	0	0	0	0	0	0	0	0	0	0	0	0	0	0	0	1	0	0	0	0	0	0	0	0	0	1	0	0	0	0	0	0	0	0	0	0	0	0	0	0	1	0	0	1	0	1	0	0	0
Otu01157	0	1	0	0	2	0	0	0	0	0	0	0	0	1	0	0	0	0	0	0	0	0	0	1	0	0	0	0	0	0	0	0	0	0	0	0	0	0	0	0	0	0	0	1	1	0	0	0	0
Otu01158	0	1	0	0	0	1	0	0	0	0	0	0	1	0	0	1	0	2	0	0	0	0	0	1	0	0	0	0	0	1	0	0	0	1	0	0	0	0	0	0	0	0	2	0	0	0	0	0	1
Otu01159	0	0	0	1	0	0	0	0	0	0	0	0	0	0	0	0	0	0	0	0	0	0	0	0	1	0	0	0	0	0	0	0	0	0	0	0	0	0	0	0	1	0	0	0	0	0	0	0	0
Otu01160	0	0	0	0	0	1	0	1	0	0	0	0	0	0	1	0	0	0	1	0	0	0	0	0	0	0	0	1	1	0	0	1	0	0	1	1	0	0	0	0	1	0	0	0	1	0	0	0	0
Otu01161	0	0	0	0	1	0	0	1	0	0	0	0	0	0	0	1	0	0	0	0	0	0	0	0	0	0	0	1	4	0	0	1	0	0	0	0	2	0	0	0	0	0	0	0	0	0	0	0	0
Otu01162	0	0	1	0	1	0	0	2	2	0	0	0	0	2	0	0	0	0	0	0	0	1	0	0	0	0	0	0	0	0	0	1	0	0	0	0	0	0	1	0	0	0	0	0	0	0	0	0	1
Otu01163	0	0	0	1	0	0	0	0	0	0	0	0	0	0	0	1	0	2	0	0	0	2	0	1	0	0	0	0	0	0	0	0	0	0	0	0	0	0	1	0	1	0	0	0	0	0	0	1	1
Otu01164	0	1	1	0	0	0	2	1	1	2	0	1	1	3	0	0	1	0	0	0	0	0	0	0	0	0	0	0	0	0	0	0	0	0	0	0	0	0	0	0	0	0	0	0	0	0	0	0	0
Otu01165	0	0	0	1	0	0	1	1	0	0	0	0	0	0	0	0	0	0	0	0	0	0	0	0	0	0	0	1	1	1	0	0	2	0	0	0	1	0	0	0	0	0	0	1	0	0	0	0	0
Otu01166	1	0	0	3	0	0	0	0	0	0	0	0	0	0	0	0	1	0	1	0	0	0	0	0	0	0	0	0	0	0	0	1	0	0	1	0	0	1	0	0	0	0	0	0	0	0	0	0	0
Otu01167	0	0	0	0	0	0	1	0	0	0	0	0	1	2	0	1	0	1	1	1	0	0	1	0	0	0	0	0	1	0	0	0	0	0	0	0	0	0	0	0	0	0	0	0	0	0	0	0	0
Otu01168	0	0	0	0	0	0	0	0	0	1	0	0	0	1	1	0	0	0	0	0	0	0	0	0	0	0	1	0	0	1	0	0	1	0	0	0	0	0	0	0	1	0	0	0	0	0	0	0	0
Otu01169	0	0	1	0	0	0	0	0	0	0	0	0	0	0	1	0	0	0	1	1	0	0	0	0	1	0	0	0	1	0	0	0	1	0	0	0	0	0	0	0	0	0	0	0	0	1	0	0	1
Otu01170	0	0	0	0	0	0	0	0	0	0	0	1	1	0	0	1	1	1	0	2	0	0	0	0	0	0	0	0	0	0	0	0	0	0	0	0	0	0	0	0	0	0	0	0	0	0	0	0	0
Otu01171	0	0	0	0	0	0	0	0	0	1	0	0	1	0	0	0	0	0	2	0	0	0	0	1	0	0	0	0	0	0	0	0	0	1	0	0	0	0	0	0	0	0	0	0	0	0	0	1	0
Otu01172	0	0	0	0	0	0	0	0	0	0	0	0	0	0	0	0	0	1	1	0	0	0	1	0	0	0	1	0	0	1	1	0	1	0	0	0	0	0	0	0	0	1	0	1	0	0	0	1	1
Otu01173	2	0	0	0	1	0	0	0	0	0	0	1	1	0	0	0	0	0	0	0	0	0	0	0	0	0	1	0	0	0	0	0	0	0	0	0	0	0	0	0	1	0	0	0	0	0	0	0	1
Otu01174	2	1	0	0	0	1	0	2	0	0	0	1	1	0	0	0	1	1	0	1	0	0	0	0	0	0	0	1	0	0	0	1	0	0	0	0	0	0	1	0	0	0	0	0	0	0	0	0	0
Otu01175	0	0	0	0	0	0	0	1	0	0	0	0	0	0	0	0	0	1	0	0	0	0	0	0	0	0	0	0	0	0	1	0	1	0	0	0	0	0	1	0	0	0	0	0	0	0	0	0	0
Otu01176	1	0	0	0	1	2	1	1	1	1	0	0	0	2	1	0	0	1	0	0	0	0	0	0	0	0	0	0	1	0	0	0	0	0	0	0	0	0	0	0	0	0	0	0	0	0	0	0	0
Otu01177	0	0	0	0	0	0	0	0	0	1	0	1	1	0	1	0	1	0	0	1	1	0	0	0	0	0	0	0	0	0	0	0	2	0	1	0	0	0	0	0	0	0	0	0	0	0	0	0	1
Otu01178	0	1	0	0	0	0	0	0	0	0	0	0	0	0	0	1	0	0	0	0	1	0	0	0	0	0	0	0	1	0	2	0	0	0	0	0	1	1	0	0	0	1	0	0	0	0	0	0	0
Otu01179	0	0	0	0	0	0	0	0	0	0	0	0	0	0	0	0	0	1	0	0	1	0	1	1	0	1	0	0	0	0	0	1	0	0	1	2	0	0	0	0	0	1	0	0	0	1	0	0	0
Otu01180	0	0	0	0	1	0	0	1	0	0	0	0	0	0	1	1	0	1	0	1	0	0	0	0	0	0	1	0	0	0	0	0	0	0	0	0	0	2	0	0	0	0	0	0	0	0	0	0	0
Otu01181	0	1	0	0	0	1	1	0	1	0	2	0	1	0	0	0	0	0	0	0	0	0	0	0	0	0	0	1	0	0	0	0	0	0	1	1	0	0	0	0	0	0	0	1	0	0	0	0	0
Otu01182	0	0	0	0	0	0	0	0	0	0	0	0	0	0	0	0	0	0	0	0	0	2	1	1	1	0	0	0	0	0	0	0	1	0	0	0	0	2	0	0	0	0	0	0	0	0	1	0	0
Otu01183	0	0	1	0	0	0	1	0	0	1	0	0	0	0	0	0	0	0	0	0	0	1	0	1	1	0	0	0	0	0	0	0	0	0	0	0	0	0	0	0	0	0	0	0	0	1	0	2	1
Otu01184	0	0	0	0	0	0	1	0	0	0	0	0	0	0	0	0	0	0	0	0	0	0	1	0	2	0	0	0	0	0	1	0	0	0	0	0	0	0	0	0	0	0	0	3	0	1	0	0	1
Otu01185	0	0	0	0	0	0	0	0	0	1	0	0	0	0	0	0	0	0	1	0	0	1	0	0	0	0	1	0	2	0	0	1	0	0	0	0	0	0	0	0	0	0	0	0	1	0	0	0	0
Otu01186	1	0	0	0	0	1	0	0	2	0	0	0	0	0	0	0	0	0	0	0	1	0	0	1	0	0	0	0	0	0	0	0	0	1	0	0	0	0	0	0	0	0	0	0	0	0	0	0	0
Otu01187	0	0	0	0	0	0	0	0	0	0	0	0	0	0	0	1	0	1	0	0	0	0	0	1	0	0	0	0	0	0	0	0	0	0	0	0	0	0	1	0	0	0	1	0	0	0	0	0	0
Otu01188	0	0	0	0	0	0	0	1	0	0	0	0	0	0	0	0	0	0	0	0	0	0	0	0	0	0	0	0	0	1	0	1	0	0	0	0	0	0	0	0	0	1	0	0	0	0	0	0	0
Otu01189	0	0	0	1	0	0	0	1	0	0	0	0	0	0	0	0	0	0	0	2	0	0	0	0	0	0	0	0	0	1	0	0	0	0	0	0	0	0	0	0	0	0	0	0	0	0	0	0	0
Otu01190	0	0	0	0	0	0	0	0	0	0	2	0	0	1	1	0	1	1	0	0	1	0	0	0	0	0	1	0	1	0	0	0	0	0	0	0	0	0	0	0	0	0	0	1	0	0	0	0	0
Otu01191	1	1	1	0	1	1	0	0	1	0	0	0	0	0	1	1	0	0	0	0	0	0	0	0	0	0	0	0	1	0	0	0	0	1	0	0	0	1	0	0	0	0	0	0	1	0	1	0	1
Otu01192	0	0	2	0	0	0	1	1	0	0	0	0	0	1	1	0	0	0	0	0	0	0	0	0	0	0	0	1	0	0	0	0	0	0	0	1	0	2	0	1	0	0	0	0	0	0	0	0	0
Otu01193	1	0	1	0	0	0	0	0	2	0	0	1	0	0	0	1	1	0	0	0	0	0	0	0	0	0	0	1	0	0	0	0	1	0	0	0	1	0	0	1	0	0	0	0	0	0	0	0	0
Otu01194	1	0	0	0	0	0	0	1	0	0	0	0	0	0	0	0	1	0	0	0	0	1	1	0	0	0	0	1	0	0	0	0	0	1	0	0	0	1	0	0	0	0	1	0	0	0	0	0	0
Otu01195	0	0	0	0	0	0	0	0	0	0	0	0	0	0	0	0	0	0	0	0	0	0	0	0	0	0	0	1	0	0	0	0	0	1	0	0	0	0	0	0	0	0	0	0	0	0	0	0	0
Otu01196	0	0	0	0	1	0	0	0	0	1	0	0	0	0	0	0	0	0	0	0	0	0	0	0	0	0	1	1	0	0	0	1	0	0	1	0	1	1	0	0	2	0	1	0	0	0	0	0	1
Otu01197	0	0	0	0	1	1	0	0	0	0	0	0	0	0	0	0	0	0	0	0	0	0	0	0	0	0	0	0	3	1	0	0	0	0	0	1	1	0	0	1	0	0	0	0	0	0	0	0	0
Otu01198	0	0	0	0	0	0	0	0	0	1	1	0	0	0	0	2	1	0	0	1	0	0	1	0	0	0	0	0	0	0	0	0	0	0	0	0	0	0	0	1	0	1	0	0	0	0	0	1	0
Otu01199	0	0	0	0	0	0	0	0	0	0	0	0	0	0	0	0	0	0	0	0	0	0	0	0	0	0	0	0	0	0	0	0	0	0	0	0	0	1	1	0	0	0	0	1	1	0	0	1	1
Otu01200	0	0	0	0	0	0	0	0	0	0	0	0	0	0	1	0	0	0	0	0	0	1	2	0	0	0	0	0	0	0	1	0	1	1	0	0	1	0	1	0	0	1	0	0	0	0	0	0	0
Otu01201	0	0	0	0	0	0	0	0	0	0	0	0	0	0	0	0	2	0	0	0	0	0	0	0	0	0	0	0	1	0	0	0	1	0	0	0	1	0	0	0	0	0	0	0	0	0	0	0	0
Otu01202	0	0	0	0	0	0	0	0	0	0	0	0	0	0	1	1	0	0	0	0	0	0	0	0	1	0	1	1	0	0	0	0	2	1	0	0	0	0	0	0	0	0	0	0	1	0	0	0	0
Otu01203	0	0	0	0	1	0	0	0	0	0	0	0	1	1	0	0	0	0	0	0	1	0	0	1	1	2	0	0	1	0	0	0	0	0	0	0	0	0	0	0	1	0	0	0	0	1	0	0	0
Otu01204	1	0	1	0	1	0	0	0	1	0	0	0	0	0	0	0	0	0	0	1	0	0	1	1	0	1	0	0	0	0	0	0	0	0	0	0	0	0	0	0	0	0	0	0	0	0	0	0	0
Otu01205	0	0	0	0	0	0	0	0	0	0	0	0	0	0	1	0	0	0	0	0	0	0	0	0	0	0	0	0	0	0	0	1	0	0	0	2	0	0	1	0	0	0	0	0	1	0	0	0	1
Otu01206	1	1	0	0	4	1	1	2	0	0	0	0	0	1	0	0	0	0	0	1	0	0	0	0	1	0	0	0	0	0	0	0	0	0	0	0	0	0	0	1	0	0	0	0	0	0	0	0	0
Otu01207	0	0	0	0	0	0	0	0	1	1	0	0	0	0	0	0	0	0	0	0	0	0	0	0	0	0	2	0	0	0	1	1	0	0	2	0	0	0	0	0	0	0	1	0	0	0	0	0	1
Otu01208	0	0	0	0	0	0	0	0	0	0	0	0	0	0	0	0	0	0	0	0	0	0	0	0	0	0	0	0	0	1	1	1	1	1	1	0	1	0	0	0	0	0	0	0	0	0	0	0	0
Otu01209	0	0	0	0	1	0	0	0	0	0	0	1	0	0	0	0	0	0	0	0	0	0	0	0	0	0	0	0	1	0	0	0	1	1	0	0	0	0	0	1	0	0	0	0	0	0	0	0	0
Otu01210	0	0	0	1	0	0	0	0	0	0	1	0	0	0	1	0	0	1	0	0	0	0	2	0	1	0	0	0	0	0	0	0	0	0	0	0	0	1	0	0	0	0	0	0	1	2	0	1	0
Otu01211	0	0	0	0	0	0	1	0	0	1	0	0	0	0	0	0	1	0	0	0	0	0	0	0	0	0	0	0	0	0	0	0	0	1	0	0	1	0	1	0	0	0	1	0	0	0	0	0	0
Otu01212	0	0	0	0	0	1	0	0	0	0	0	1	0	0	0	0	0	0	0	0	0	0	0	0	0	0	0	1	0	1	0	0	1	0	0	0	1	1	0	0	0	0	0	0	0	0	0	0	0
Otu01213	0	0	0	0	0	0	0	0	0	0	0	0	0	0	0	0	0	0	0	0	0	0	0	0	0	0	0	0	0	0	0	0	0	0	0	0	0	0	0	0	0	0	0	0	0	0	0	0	0
Otu01214	0	1	0	0	0	0	0	0	1	0	1	0	1	1	0	0	0	0	0	0	0	0	0	0	0	0	0	0	0	0	0	0	0	1	0	0	0	0	0	0	0	0	0	0	0	1	2	0	3
Otu01215	1	0	0	0	0	0	0	0	0	0	0	0	0	0	0	0	0	0	0	0	0	0	0	0	0	0	0	0	0	0	0	0	0	0	0	0	0	0	0	0	0	0	0	0	0	0	0	0	0
Otu01216	0	0	0	0	0	0	0	0	0	0	0	0	0	0	0	0	0	1	1	0	0	0	0	0	0	0	0	0	0	0	0	0	1	3	0	0	0	0	0	1	0	0	0	0	0	0	1	0	0
Otu01217	1	0	0	0	0	1	2	0	0	0	0	0	0	0	0	0	0	1	0	0	0	0	0	0	0	0	0	0	0	1	0	0	0	0	1	0	0	1	0	0	0	2	0	0	0	0	0	0	0
Otu01218	2	0	0	0	2	0	0	0	1	0	0	0	0	0	0	0	1	0	0	0	0	0	1	0	0	0	1	0	0	1	1	0	0	0	0	0	0	0	0	0	0	0	0	1	0	0	0	0	1
Otu01219	1	0	0	0	0	0	0	0	0	0	0	0	0	0	0	0	0	0	0	0	0	0	0	0	0	0	0	0	0	1	2	0	0	0	1	0	0	0	0	0	0	0	0	0	0	0	0	0	0
Otu01220	1	0	0	0	0	1	0	0	0	0	0	1	0	0	0	0	0	0	1	1	0	0	1	0	0	0	0	0	0	0	1	0	0	0	1	0	0	0	0	0	0	0	0	0	0	0	0	0	1
Otu01221	0	0	0	1	0	0	0	0	0	0	2	0	0	0	0	1	0	0	0	0	0	0	0	0	0	0	1	0	0	1	0	0	0	0	1	1	1	0	0	0	0	0	0	0	0	0	0	0	0
Otu01222	0	0	0	0	0	0	0	0	0	0	0	0	0	0	0	0	0	0	0	0	0	0	0	0	1	0	0	0	0	0	0	0	0	0	0	0	0	0	1	0	0	1	0	0	0	0	1	0	0
Otu01223	1	0	1	0	0	0	1	1	1	1	0	1	1	0	0	0	0	0	1	0	0	1	0	0	0	0	0	0	0	0	0	0	0	0	0	0	0	0	0	0	1	0	0	0	0	0	1	1	0
Otu01224	0	0	0	0	0	1	1	0	0	0	0	0	0	0	0	0	0	0	0	0	1	0	1	0	1	0	0	0	0	0	0	0	1	0	0	0	0	0	0	0	0	1	0	0	0	1	0	0	0
Otu01225	0	1	0	0	0	0	0	1	1	0	0	1	0	0	1	1	1	1	0	0	0	0	0	1	0	0	0	0	0	0	0	0	1	0	0	0	0	0	0	0	0	1	1	0	0	0	1	0	0
Otu01226	0	0	0	0	0	0	0	0	0	0	0	0	0	0	0	0	1	0	0	0	0	0	1	1	0	0	0	0	0	0	0	0	0	0	0	0	0	2	0	0	0	0	0	0	0	0	0	0	0
Otu01227	1	0	1	1	1	0	2	0	0	0	1	0	0	0	1	0	0	0	0	0	0	0	0	0	0	0	0	0	0	0	0	0	0	2	0	0	0	0	0	1	0	0	0	0	0	1	1	0	0
Otu01228	0	0	0	0	1	1	1	0	0	0	0	0	0	0	0	0	0	0	0	0	1	1	0	0	0	0	0	0	0	1	1	0	0	0	1	1	0	0	1	0	0	0	0	0	0	0	0	0	0
Otu01229	0	1	0	1	0	1	0	1	0	0	2	0	0	1	0	0	1	0	0	0	1	0	1	0	0	0	0	0	0	0	0	0	0	0	0	0	0	0	0	0	0	0	0	0	0	0	0	0	0
Otu01230	1	1	0	0	0	0	0	0	0	0	0	0	0	0	0	1	0	0	0	0	0	0	0	0	0	0	0	0	1	0	3	0	0	2	0	0	1	0	0	0	0	0	0	1	0	0	0	0	0
Otu01231	0	0	0	0	0	0	0	0	0	0	0	0	0	0	1	0	1	0	0	0	1	0	0	0	0	0	0	1	0	2	0	1	0	1	0	0	0	0	0	0	0	0	0	0	0	0	0	0	0
Otu01232	1	0	0	0	0	0	0	0	0	0	0	0	0	0	1	0	0	0	0	0	0	0	0	0	0	0	0	0	0	0	1	0	0	0	0	0	0	0	0	1	0	0	0	0	0	0	1	1	0
Otu01233	2	0	0	1	1	0	0	1	0	0	0	1	1	0	0	2	0	0	0	2	0	0	0	0	0	0	0	0	0	0	0	0	0	0	0	1	0	0	0	0	0	0	0	0	0	0	0	0	0
Otu01234	0	0	0	1	0	0	1	0	1	1	0	0	0	0	0	1	0	0	0	0	0	0	0	0	0	0	0	0	0	1	0	0	0	0	0	0	0	0	1	0	1	0	0	1	0	0	1	0	0
Otu01235	1	1	0	0	0	0	2	0	0	0	0	0	0	0	0	0	0	0	0	0	0	0	0	0	0	0	0	1	0	0	0	2	0	0	0	0	0	1	0	1	0	0	0	0	0	0	0	0	0
Otu01236	1	0	0	1	0	0	1	0	1	0	1	0	1	0	0	0	0	0	0	0	0	0	0	0	0	0	0	0	0	0	0	0	0	0	0	0	0	1	0	0	0	0	0	0	0	0	0	0	0
Otu01237	0	0	0	0	0	0	2	0	0	0	0	0	0	0	0	0	0	0	0	0	0	0	1	0	0	0	0	1	0	0	0	1	0	0	0	0	0	0	0	0	0	0	0	0	0	0	0	0	0
Otu01238	0	0	0	0	0	0	0	0	0	0	0	1	0	0	0	2	0	0	1	0	0	0	0	0	0	0	0	0	0	0	1	0	0	0	0	1	0	0	0	0	2	0	0	0	0	1	1	0	0
Otu01239	0	1	2	0	0	1	0	1	0	0	1	0	1	0	0	0	0	1	0	0	0	0	0	0	0	0	0	0	1	0	2	0	0	0	0	0	0	0	0	0	0	0	0	0	0	0	0	0	0
Otu01240	0	0	0	0	0	0	0	0	1	0	0	0	0	0	0	1	0	0	0	0	0	0	0	0	0	0	0	0	1	2	0	2	0	0	1	0	0	1	1	0	0	0	0	0	0	0	0	0	0
Otu01241	0	0	0	0	0	0	0	0	1	0	0	0	0	0	0	0	0	0	0	0	0	0	0	0	0	0	1	1	0	0	0	1	0	0	0	0	0	0	0	0	0	0	0	0	0	0	1	0	0
Otu01242	0	1	0	0	0	0	0	0	0	1	0	0	0	0	0	0	0	0	0	0	0	0	0	0	1	0	0	0	0	0	0	0	0	0	0	1	0	0	0	0	0	0	0	0	0	0	0	5	0
Otu01243	0	0	0	0	0	0	0	0	0	0	0	0	0	0	0	0	0	0	0	0	0	1	0	1	0	2	0	0	0	0	0	0	0	1	0	1	0	1	0	0	0	0	0	0	1	1	0	1	1
Otu01244	0	0	0	0	0	0	0	0	0	0	0	0	0	0	0	0	0	0	0	0	0	0	0	0	0	0	0	0	0	0	0	0	0	0	0	0	0	0	0	1	0	1	1	0	1	0	1	1	0
Otu01245	1	0	2	0	0	0	0	0	0	1	0	1	1	0	0	0	1	0	0	0	0	0	0	0	0	1	2	0	0	0	0	0	0	0	0	1	0	0	0	0	0	0	0	0	0	0	0	1	0
Otu01246	0	1	0	0	0	0	0	0	0	0	0	0	0	0	0	1	0	0	0	0	0	0	0	0	0	0	0	0	0	0	0	0	1	0	0	0	0	0	0	0	0	0	0	0	0	0	1	0	0
Otu01247	0	1	0	0	2	1	0	0	1	0	1	0	0	0	0	0	0	0	0	0	0	0	0	0	1	0	0	1	0	0	0	1	0	0	0	0	0	1	0	0	0	0	0	0	0	0	0	0	0
Otu01248	0	0	0	0	0	0	0	0	0	0	0	0	0	1	0	0	0	1	0	0	0	0	0	0	0	0	0	0	1	0	0	0	0	0	0	0	0	0	0	0	0	0	0	0	0	1	0	0	0
Otu01249	0	0	0	0	0	0	0	0	0	1	0	0	1	0	0	0	0	0	0	0	0	0	0	0	0	0	1	1	1	1	0	1	1	0	0	1	1	0	0	0	0	0	0	0	0	0	0	0	0
Otu01250	0	1	0	1	1	0	1	0	0	0	1	0	0	0	1	0	0	0	0	0	0	0	1	0	0	0	0	1	0	0	0	0	0	0	0	0	0	0	1	0	0	0	0	0	0	0	1	0	0
Otu01251	0	0	0	0	0	0	1	1	0	0	0	0	0	1	0	0	0	0	0	0	0	0	1	0	1	1	0	0	0	0	0	0	0	0	1	0	0	0	0	0	0	0	0	0	0	0	0	1	0
Otu01252	0	0	0	0	0	0	0	0	0	0	0	0	0	0	0	0	0	0	0	0	0	0	0	0	0	0	0	0	0	0	0	0	0	0	0	0	0	0	0	0	0	0	0	0	0	0	0	0	0
Otu01253	0	0	0	1	0	0	0	0	0	0	0	0	0	0	0	0	0	0	0	0	0	0	0	0	0	0	0	0	0	0	0	1	1	0	0	0	1	0	0	0	0	0	1	0	0	0	0	0	0
Otu01254	1	0	0	0	0	1	0	0	0	0	1	0	0	0	0	1	0	0	1	0	0	0	1	0	0	0	0	0	0	1	0	0	0	0	0	0	0	0	0	0	0	0	0	0	0	0	1	1	0
Otu01255	0	0	0	0	0	0	0	0	0	0	1	0	0	0	1	0	0	0	0	0	0	0	0	0	0	0	1	2	0	0	0	0	0	1	0	0	0	0	0	0	0	0	0	0	1	0	0	0	0
Otu01256	0	0	0	0	1	0	0	0	0	1	0	0	0	0	0	0	0	0	1	0	0	0	0	0	0	0	0	0	0	0	0	1	0	0	0	0	0	1	0	0	0	0	0	0	0	0	0	0	0
Otu01257	0	1	0	0	0	0	1	1	0	0	0	0	0	0	0	0	0	0	0	0	0	0	0	0	0	0	0	2	0	0	0	0	2	0	0	1	0	0	0	0	0	0	0	0	0	1	0	0	0
Otu01258	0	0	0	0	0	0	0	1	0	0	0	0	0	0	1	0	0	0	0	0	0	1	0	2	0	0	0	0	0	0	0	0	0	0	1	0	0	0	0	0	0	0	0	0	0	0	1	0	0
Otu01259	0	0	0	0	0	0	0	1	0	0	0	0	0	1	0	0	0	0	1	0	0	1	1	0	0	0	0	0	1	0	0	0	0	0	0	0	0	0	0	0	0	0	0	0	0	0	0	1	0
Otu01260	0	1	0	0	0	0	0	0	0	0	0	0	0	0	0	0	0	0	0	0	0	0	0	0	0	0	0	0	0	0	0	0	0	0	0	0	0	0	0	0	0	0	0	0	0	0	0	1	1
Otu01261	0	0	0	0	0	0	0	0	1	0	0	0	0	0	0	0	1	0	0	0	0	0	0	0	0	0	0	1	0	1	0	0	0	0	1	0	0	1	0	0	0	0	0	0	0	0	0	0	0
Otu01262	0	0	0	1	0	0	0	0	0	0	0	0	1	0	1	1	0	0	0	1	0	0	0	0	0	0	0	0	0	0	0	0	0	0	0	0	0	0	0	0	0	1	1	1	1	0	1	0	0
Otu01263	0	0	0	0	0	1	1	0	0	0	1	0	0	0	0	0	0	0	0	0	0	0	0	0	0	0	0	0	1	0	0	0	0	0	0	0	0	0	0	0	0	1	0	0	1	0	1	0	1
Otu01264	1	0	0	1	0	0	0	0	0	0	0	0	0	1	0	0	0	0	0	0	0	0	0	0	0	0	0	0	0	0	0	0	2	0	0	1	0	1	0	1	0	0	0	0	0	0	1	0	0
Otu01265	0	0	0	0	0	0	1	0	0	0	0	0	0	0	0	0	0	0	0	0	0	0	0	0	0	0	0	1	0	0	0	0	0	0	0	0	0	0	0	0	0	0	0	0	0	0	1	1	0
Otu01266	1	1	0	0	0	0	0	0	0	0	0	2	0	1	0	1	0	0	0	0	1	0	0	0	0	0	1	0	0	0	0	0	0	0	0	0	0	0	0	0	0	1	0	0	0	1	1	0	0
Otu01267	0	0	0	0	0	1	0	0	2	1	0	0	0	0	0	0	0	0	0	0	0	0	0	0	0	0	0	0	0	0	0	0	0	0	0	0	0	0	0	0	0	0	0	0	0	0	0	0	0
Otu01268	0	0	0	0	0	0	0	0	0	1	0	0	0	0	0	0	0	1	1	1	1	0	0	0	0	0	0	0	0	0	0	0	0	0	0	0	0	0	0	0	0	0	0	0	1	0	0	0	1
Otu01269	0	0	0	1	0	0	0	1	0	0	0	0	0	0	0	0	0	0	0	0	0	0	0	0	0	0	0	0	1	1	0	0	0	0	0	0	0	0	1	0	0	0	0	0	0	1	0	1	0
Otu01270	0	12	0	0	0	0	0	0	0	0	0	0	0	0	0	0	0	0	0	0	0	0	0	0	0	0	0	1	0	0	0	0	0	0	0	0	0	0	0	0	0	0	0	0	0	0	0	0	0
Otu01271	0	0	0	0	0	0	1	0	1	1	0	0	0	1	0	0	0	0	0	1	0	0	0	0	0	0	0	1	2	0	0	0	0	0	0	0	1	0	0	0	0	0	0	0	0	0	0	0	0
Otu01272	0	0	0	0	0	0	0	0	0	0	0	0	0	0	0	0	0	0	0	0	0	0	0	0	0	0	0	0	0	1	0	0	1	0	0	0	0	1	0	0	0	0	1	0	0	0	1	0	0
Otu01273	0	0	1	0	0	0	0	0	0	1	0	1	0	2	0	0	0	0	0	0	0	0	0	0	0	0	0	0	0	0	0	3	0	0	0	0	0	0	0	0	1	0	0	1	0	0	0	0	0
Otu01274	0	0	0	0	0	0	1	0	0	0	0	0	0	0	0	0	0	0	0	0	0	1	0	0	1	0	0	0	0	0	0	0	0	0	0	0	0	0	0	0	0	0	0	0	0	0	0	0	0
Otu01275	0	0	0	0	1	0	1	1	1	1	0	1	1	1	1	0	1	0	0	1	0	0	0	0	0	0	0	0	0	0	0	0	0	0	0	0	0	0	0	0	0	0	0	0	0	0	1	0	0
Otu01276	0	0	0	0	0	0	0	0	0	0	0	0	0	0	0	0	1	0	0	0	1	2	0	3	1	0	0	0	0	0	0	0	0	0	0	0	0	0	0	1	1	0	0	0	0	0	0	0	0
Otu01277	0	0	0	0	1	0	0	1	0	1	0	2	0	1	0	0	0	1	1	0	0	0	0	0	0	1	0	0	0	0	1	0	1	0	0	0	0	2	0	0	0	0	0	0	0	0	0	0	0
Otu01278	0	0	1	0	0	0	1	0	1	0	0	0	0	1	1	0	1	0	0	0	0	0	0	0	0	0	0	0	0	0	0	0	0	0	0	0	0	0	0	2	0	0	0	0	0	0	0	0	0
Otu01279	0	0	0	0	1	0	1	1	0	0	0	0	1	0	0	0	0	0	0	0	0	0	0	0	0	0	0	0	0	0	0	0	0	0	0	0	0	0	0	1	1	0	0	1	0	0	0	0	0
Otu01280	0	0	0	0	0	1	0	0	0	1	1	0	0	0	0	0	0	0	0	0	0	0	0	0	0	1	1	0	1	0	0	0	0	4	1	0	0	0	1	0	1	0	0	0	0	0	0	0	0
Otu01281	0	0	0	0	0	0	0	0	0	0	0	0	0	0	0	0	0	0	0	0	0	0	0	0	0	0	0	0	1	0	0	0	0	0	0	0	0	0	0	0	0	0	0	0	0	2	0	0	0
Otu01282	0	0	0	0	0	0	0	1	3	0	0	0	0	0	0	0	0	0	0	0	0	0	0	0	0	0	1	0	0	0	0	0	0	0	0	0	0	0	0	0	0	0	0	0	0	0	0	0	0
Otu01283	0	0	0	0	0	0	0	0	0	0	0	1	0	1	0	0	0	0	0	0	0	0	0	2	2	2	0	0	0	0	0	0	0	0	0	0	1	1	0	0	0	0	0	0	0	1	0	2	0
Otu01284	0	0	0	0	1	0	0	0	0	2	0	0	0	0	0	0	1	0	0	0	0	0	0	0	0	0	0	0	0	0	1	0	0	0	0	0	0	0	0	0	0	1	0	0	0	0	0	1	0
Otu01285	0	1	0	1	0	1	0	0	0	0	0	0	0	0	0	0	0	0	0	1	0	0	0	1	0	0	1	0	0	0	2	0	0	0	0	0	2	0	0	0	0	0	0	0	1	0	0	0	0
Otu01286	0	0	0	0	0	0	0	0	0	1	2	0	2	0	0	0	0	0	0	0	0	0	0	0	0	0	0	0	0	0	1	0	0	0	0	1	0	0	0	0	1	0	0	0	1	0	0	0	0
Otu01287	1	0	0	0	0	0	0	0	3	0	0	0	0	1	0	1	0	0	0	0	0	0	0	0	0	0	0	0	0	0	0	0	0	0	1	0	0	0	0	0	0	1	2	0	0	0	0	0	0
Otu01288	0	0	0	0	1	0	0	0	0	0	0	0	0	0	0	1	0	0	2	1	0	0	0	0	2	0	0	0	0	0	0	0	0	0	0	0	0	0	1	0	0	0	0	0	0	1	0	0	1
Otu01289	1	0	0	0	0	0	0	0	0	0	0	0	1	0	0	0	0	0	0	1	0	0	0	0	0	0	0	1	0	0	1	1	1	1	0	0	0	2	0	0	1	0	1	0	1	1	0	0	0
Otu01290	1	0	1	0	0	0	1	0	0	0	0	1	0	0	0	0	0	0	1	0	0	0	0	0	0	0	0	0	0	0	0	0	0	0	0	0	0	0	0	0	0	0	0	0	0	0	0	0	1
Otu01291	0	0	0	0	0	0	0	0	0	0	0	0	0	0	0	0	0	0	0	0	0	0	0	0	0	0	0	0	0	0	0	0	0	0	0	0	0	0	1	0	1	0	0	0	0	0	0	0	0
Otu01292	0	0	0	0	1	0	1	0	0	0	0	0	1	0	0	0	0	0	0	0	0	0	0	0	1	0	0	0	0	0	1	2	0	0	0	0	0	0	0	1	0	0	0	0	0	0	0	0	1
Otu01293	0	0	0	0	0	0	0	0	0	1	0	0	1	0	0	0	0	0	0	0	0	0	0	0	0	0	0	1	0	1	0	0	0	0	0	0	0	0	2	0	0	1	0	0	0	1	0	0	0
Otu01294	0	0	0	0	0	0	0	0	0	0	0	0	0	0	0	0	0	1	0	0	0	1	0	0	0	0	0	0	0	0	0	0	0	1	0	0	0	0	0	0	0	0	0	0	1	0	0	0	0
Otu01295	0	1	1	0	1	1	1	0	0	1	0	0	0	0	0	0	0	0	0	0	0	1	0	0	0	0	0	0	0	2	0	1	1	0	1	0	0	0	0	0	0	0	0	0	0	0	0	0	0
Otu01296	0	0	0	0	0	0	0	0	0	0	0	2	0	0	0	0	0	0	1	0	0	0	0	1	0	0	0	0	0	1	1	0	0	0	0	0	0	0	0	0	0	0	0	0	0	1	0	0	0
Otu01297	0	0	0	0	0	0	0	0	0	0	0	0	0	0	0	0	0	0	0	0	0	0	0	2	0	1	0	0	0	0	0	0	0	1	0	0	0	0	0	0	0	0	0	0	0	0	0	0	0
Otu01298	0	0	0	0	0	0	0	0	0	0	1	0	0	0	0	0	0	0	0	0	0	0	0	1	0	0	0	0	0	1	0	0	0	0	0	0	0	1	0	0	0	1	0	0	0	0	0	0	0
Otu01299	0	0	0	0	0	0	0	0	0	0	0	0	0	0	0	0	0	0	0	0	0	0	0	0	2	1	0	0	0	0	0	0	0	0	0	0	0	0	0	0	0	0	0	0	0	1	0	0	0
Otu01300	0	0	0	0	0	1	0	0	0	0	0	0	0	0	0	0	0	0	0	0	0	0	0	0	0	0	2	0	0	0	0	0	0	0	0	0	0	0	0	1	0	0	0	0	0	0	0	1	0
Otu01301	0	0	0	0	0	0	0	1	0	0	0	0	0	0	0	0	0	0	0	0	0	0	0	2	0	1	0	0	0	0	0	0	0	0	0	0	0	0	0	1	0	0	0	0	1	0	1	0	0
Otu01302	1	0	0	0	0	0	2	0	0	0	0	0	0	0	0	0	0	0	0	0	0	0	1	0	0	1	0	0	1	0	0	0	0	0	0	0	0	0	0	0	0	0	0	0	0	0	0	0	0
Otu01303	0	0	0	0	0	0	0	0	0	0	0	0	0	1	0	1	0	0	0	0	0	1	0	1	1	0	1	0	0	0	0	0	1	0	0	0	0	2	0	0	0	0	0	0	0	0	0	0	1
Otu01304	1	0	0	0	0	0	0	0	0	1	0	0	0	0	1	1	0	0	0	1	0	0	0	0	0	0	0	0	0	0	0	0	0	1	0	0	1	0	1	0	1	0	2	0	1	1	1	0	0
Otu01305	0	1	1	1	0	0	1	0	0	0	0	0	0	1	1	0	0	0	0	0	0	0	1	0	0	0	0	0	0	0	0	0	0	0	0	1	0	0	0	0	0	0	0	0	0	0	0	1	0
Otu01306	0	0	1	1	1	0	0	0	2	1	0	0	1	1	0	2	0	0	0	0	0	0	0	1	0	0	0	0	0	0	0	0	0	0	0	0	0	0	0	0	0	1	0	0	0	0	0	0	1
Otu01307	0	0	1	0	0	0	0	0	0	0	0	0	0	0	1	0	0	0	0	0	1	2	0	0	1	0	0	0	0	0	0	0	0	0	0	0	0	2	0	0	0	0	0	0	0	1	0	1	0
Otu01308	0	0	0	0	0	0	0	0	0	0	0	0	0	0	0	0	0	0	0	0	0	0	1	0	0	1	0	0	0	0	0	0	0	0	0	0	0	1	0	1	0	0	0	0	0	0	0	1	2
Otu01309	0	0	0	0	0	0	0	1	0	0	0	0	0	0	0	0	0	0	0	0	0	0	0	1	0	1	0	0	0	0	0	0	0	0	1	1	0	1	0	0	0	0	0	0	0	0	0	2	1
Otu01310	0	0	1	0	0	1	0	0	0	0	0	0	0	0	0	0	0	0	0	0	0	0	0	0	0	1	0	0	1	1	0	0	1	0	0	0	0	1	0	0	0	1	0	0	0	0	0	0	0
Otu01311	0	0	0	0	0	0	0	0	0	0	0	0	0	0	0	0	0	0	0	0	0	0	0	0	0	0	0	0	1	0	1	0	0	0	0	0	0	0	0	1	0	0	0	0	0	0	0	0	0
Otu01312	0	1	0	0	0	0	1	0	0	1	0	1	0	0	1	0	1	0	1	0	0	0	0	0	0	0	0	0	0	0	1	0	0	0	2	1	0	0	0	0	0	0	0	0	0	0	0	0	0
Otu01313	0	0	1	1	0	1	0	0	0	0	0	0	0	0	2	0	1	2	0	0	0	0	0	0	0	0	0	0	0	0	0	0	2	0	0	0	0	0	0	1	0	0	0	0	0	0	0	0	0
Otu01314	0	0	0	0	0	0	0	0	0	1	1	0	0	0	0	0	1	0	0	0	0	0	0	1	1	1	0	0	0	0	0	0	0	0	0	0	0	2	1	0	0	0	0	0	0	0	0	0	0
Otu01315	0	0	0	0	1	0	0	1	1	0	0	1	0	1	0	0	0	0	0	0	0	0	0	0	0	0	1	0	0	0	0	0	1	0	0	0	0	0	0	0	0	0	0	0	0	0	0	0	0
Otu01316	0	0	0	0	0	0	0	0	0	0	0	0	0	0	1	0	0	0	0	1	1	0	1	1	1	0	0	0	0	0	0	0	0	1	0	0	0	0	0	0	0	1	0	0	0	0	1	0	0
Otu01317	0	0	0	0	1	0	0	0	0	0	0	0	1	0	0	0	0	0	0	0	0	1	0	0	2	0	0	0	0	0	0	0	0	0	0	0	0	0	0	0	0	1	0	0	0	1	1	0	0
Otu01318	0	0	0	0	0	0	0	0	0	0	0	0	0	0	0	0	0	0	0	0	1	0	1	1	0	0	0	0	0	0	0	0	0	0	0	1	0	0	0	0	0	0	0	0	0	0	0	2	0
Otu01319	0	0	0	0	0	0	0	0	0	0	0	0	0	0	0	0	0	0	0	0	2	1	4	0	1	1	0	0	0	0	0	0	0	0	0	0	0	0	0	0	0	0	0	0	0	0	1	0	0
Otu01320	0	0	0	0	0	0	0	0	0	0	0	0	0	0	0	0	0	1	0	0	0	0	0	0	0	0	1	0	0	0	0	0	0	0	0	0	0	0	0	0	0	0	0	0	0	0	0	0	0
Otu01321	0	0	0	0	0	0	0	0	1	0	0	0	0	0	1	0	0	1	1	0	0	0	0	0	0	0	2	1	1	0	0	0	0	0	0	0	1	0	0	0	0	0	1	0	0	0	0	0	0
Otu01322	0	0	1	0	0	0	2	0	0	0	0	0	0	0	0	0	0	0	0	0	0	0	0	0	0	0	0	0	0	0	1	1	0	0	0	0	0	0	0	0	0	0	0	0	0	0	0	0	0
Otu01323	0	0	1	0	1	0	0	0	0	1	0	1	1	0	0	0	0	0	3	0	1	0	0	0	0	0	0	0	0	0	0	0	0	0	0	0	0	0	0	0	0	0	0	0	0	0	0	0	0
Otu01324	1	0	1	0	0	0	1	0	1	2	0	0	0	0	0	0	0	0	0	0	0	0	0	0	0	0	1	0	0	0	0	0	0	0	0	1	0	0	0	0	0	0	0	0	0	0	2	0	0
Otu01325	0	0	1	0	1	0	0	0	0	0	0	1	0	0	0	0	0	0	0	1	0	1	0	0	0	0	1	0	1	0	1	0	0	0	0	0	0	0	0	1	0	0	0	0	1	0	0	0	0
Otu01326	1	0	0	3	0	0	0	0	0	1	0	0	0	0	2	0	0	0	0	1	0	0	0	0	0	0	0	0	0	0	0	0	1	0	0	0	1	0	0	0	1	0	0	0	0	0	0	0	1
Otu01327	0	0	0	0	0	0	1	0	1	0	0	1	0	0	0	0	0	0	0	1	1	0	0	0	0	0	0	0	1	0	0	0	0	0	0	0	0	0	0	0	0	0	0	0	1	0	0	1	1
Otu01328	0	0	0	0	0	0	0	0	1	2	1	1	0	1	0	0	0	2	0	0	0	0	0	0	0	0	0	0	0	2	1	0	0	0	0	0	0	0	0	0	0	0	0	0	0	0	0	0	0
Otu01329	0	1	0	0	0	0	0	1	2	0	0	1	0	0	0	0	0	0	0	0	0	0	0	0	0	0	0	0	0	0	0	0	0	0	0	0	0	0	0	0	0	1	0	1	0	1	0	0	0
Otu01330	0	0	0	0	0	0	0	0	0	0	0	0	0	0	0	0	0	0	0	0	0	0	0	0	0	0	0	0	0	0	0	0	0	0	0	0	0	0	0	1	0	0	1	1	1	2	0	0	0
Otu01331	0	1	0	0	0	0	0	0	0	1	0	0	1	0	0	0	0	0	0	0	0	0	0	0	0	0	0	1	0	0	0	0	0	0	0	0	0	1	1	0	0	0	0	0	0	0	0	0	0
Otu01332	0	0	0	0	0	0	1	0	0	0	1	0	0	0	0	0	1	1	0	0	0	1	0	0	0	0	0	0	0	0	0	0	0	0	0	0	0	0	0	0	0	0	0	0	0	0	0	0	0
Otu01333	0	0	0	2	0	0	0	0	0	0	0	0	0	0	0	1	0	0	0	0	0	0	0	0	0	0	0	0	0	1	0	0	0	0	0	0	0	0	0	0	1	0	0	0	0	0	0	0	0
Otu01334	0	0	0	1	0	1	1	0	0	1	0	0	2	0	0	0	0	0	0	0	1	0	0	0	0	0	1	0	0	2	1	0	0	0	0	1	0	0	1	0	0	1	0	0	0	0	0	0	0
Otu01335	0	0	0	0	0	0	0	0	0	0	0	0	0	0	0	0	0	0	0	0	2	1	0	0	0	0	0	0	0	0	0	0	0	0	0	0	0	0	0	0	0	0	0	0	1	0	0	0	0
Otu01336	0	1	0	1	0	0	0	0	0	0	1	0	0	0	0	0	0	0	0	0	0	0	0	0	0	0	0	0	1	0	1	0	0	0	1	0	0	0	0	0	0	0	0	0	0	0	0	0	0
Otu01337	0	0	0	0	0	0	0	0	0	0	0	0	0	0	0	1	0	0	0	0	0	1	1	1	1	1	0	0	0	0	0	0	0	1	0	0	0	0	0	1	0	0	1	0	0	0	1	0	0
Otu01338	0	0	0	1	0	0	0	0	0	0	0	0	0	0	0	0	1	0	0	0	1	0	0	0	0	0	0	0	0	0	0	1	0	0	0	0	0	0	0	0	0	0	0	0	0	0	0	0	0
Otu01339	0	0	0	0	0	0	0	0	0	0	0	0	1	0	0	0	0	0	0	0	0	0	0	0	0	0	0	0	0	0	0	0	0	0	0	0	0	0	0	0	0	1	0	0	0	0	0	0	2
Otu01340	0	0	0	0	0	0	0	0	0	0	0	0	0	0	0	1	0	0	0	0	0	0	0	0	1	0	0	0	1	0	0	0	0	0	1	0	2	0	0	0	0	0	0	0	0	0	0	0	0
Otu01341	0	2	0	0	0	0	0	0	0	0	0	0	0	0	0	0	0	1	0	0	0	0	0	0	0	0	0	0	0	0	0	0	0	0	0	0	0	0	0	1	0	0	0	0	1	1	0	0	0
Otu01342	0	0	0	0	1	0	0	1	0	0	0	0	0	0	0	0	0	0	0	0	0	0	1	0	1	0	0	0	0	0	0	0	0	0	0	0	0	0	0	0	0	0	0	0	0	0	0	0	0
Otu01343	0	0	0	0	1	1	1	0	0	0	0	0	0	0	0	0	0	0	0	1	0	0	0	1	0	1	0	2	0	0	0	0	0	0	0	0	0	0	0	0	0	1	0	0	0	0	0	0	0
Otu01344	0	0	0	0	0	0	1	0	0	0	0	1	1	0	0	0	0	1	0	0	0	0	0	0	0	0	0	1	1	1	0	0	2	0	0	1	2	0	0	0	0	0	0	1	0	0	0	0	0
Otu01345	1	0	0	0	0	0	0	0	1	0	0	0	0	0	0	0	0	0	0	0	1	0	0	0	0	0	0	0	0	0	0	0	0	0	0	0	0	0	0	0	0	0	0	0	0	0	0	0	0
Otu01346	0	0	0	0	0	0	0	0	1	0	0	0	0	0	0	0	0	0	0	0	0	0	0	0	0	0	1	0	0	0	0	0	1	2	0	1	0	0	1	0	1	0	0	0	0	1	0	0	0
Otu01347	0	0	0	0	0	0	0	0	1	0	0	0	1	0	0	1	0	0	0	0	0	1	0	1	0	1	0	0	0	0	0	0	0	0	0	0	0	0	0	0	0	0	1	0	0	0	0	1	0
Otu01348	2	0	0	1	0	0	0	0	0	1	0	0	0	1	0	0	0	1	0	0	0	0	0	0	0	0	0	0	0	0	0	0	0	0	0	0	1	0	0	0	0	0	0	0	0	0	1	0	0
Otu01349	0	0	0	0	0	0	0	0	0	0	0	0	0	0	0	0	0	1	0	0	0	0	0	0	0	0	1	0	0	1	0	0	1	0	0	0	0	0	0	1	0	1	0	0	0	0	0	0	0
Otu01350	0	0	0	0	0	0	0	0	0	0	0	0	0	0	0	0	0	0	0	0	0	0	0	0	0	0	0	0	0	0	0	0	0	0	0	0	0	0	0	0	0	0	0	0	1	0	1	0	0
Otu01351	0	0	0	0	1	1	0	0	0	0	0	0	0	1	0	0	0	0	0	0	0	0	0	0	0	0	0	0	0	3	0	1	0	0	1	0	0	1	0	0	0	0	0	0	0	0	0	0	0
Otu01352	0	0	0	0	0	0	0	0	0	0	0	0	0	0	0	0	0	0	0	0	0	0	0	0	0	0	0	0	0	0	0	0	0	0	0	0	0	0	0	0	0	0	0	0	0	0	0	0	0
Otu01353	0	0	2	0	0	0	0	0	0	1	1	2	0	0	0	1	1	0	0	0	0	0	0	0	0	0	0	0	0	0	0	0	0	0	0	0	0	0	0	0	0	0	0	1	1	0	0	0	1
Otu01354	0	0	0	0	0	0	1	0	0	0	0	0	0	0	0	0	0	0	1	0	0	0	0	0	0	1	0	0	0	0	1	0	0	0	0	0	0	0	1	1	0	0	0	0	0	0	1	0	0
Otu01355	0	0	0	0	0	0	0	0	0	0	0	0	0	0	0	0	0	0	0	0	0	0	0	0	0	0	0	0	0	0	0	0	0	0	0	0	0	0	0	0	0	0	0	0	0	0	0	1	0
Otu01356	0	0	0	0	0	0	0	0	0	0	0	0	0	0	0	0	0	0	0	0	0	0	0	1	0	0	0	0	0	0	0	0	0	0	0	0	0	0	0	0	1	1	1	0	0	1	0	0	0
Otu01357	0	0	0	0	0	0	0	0	0	0	0	0	1	0	0	0	0	0	0	0	0	0	0	0	0	0	1	0	0	0	0	0	0	0	0	0	0	0	0	1	0	0	0	0	0	1	0	0	0
Otu01358	0	0	0	0	0	0	0	0	0	0	0	0	0	0	0	0	0	0	0	0	0	0	0	0	0	0	0	0	0	0	0	0	0	0	0	0	0	0	0	1	0	0	0	1	0	0	0	0	0
Otu01359	0	1	1	0	0	0	0	0	0	0	0	0	0	0	0	0	0	0	0	0	0	0	0	0	0	0	0	0	0	0	0	0	0	0	0	0	0	0	0	0	1	0	0	0	0	0	0	0	0
Otu01360	0	1	0	0	0	0	0	0	0	1	0	0	0	0	0	0	0	0	0	0	0	0	0	0	0	0	0	0	0	0	1	0	0	0	0	0	0	0	0	0	0	0	0	0	0	0	0	1	0
Otu01361	0	1	0	0	0	1	0	0	1	0	0	0	1	0	0	1	0	0	1	1	0	0	0	0	0	0	1	0	0	0	0	0	0	0	0	0	0	0	0	0	0	0	0	0	0	0	0	0	0
Otu01362	1	0	0	0	0	0	0	0	0	1	0	0	0	0	0	0	0	1	0	0	0	0	0	0	0	0	0	0	0	0	0	0	0	0	0	0	0	0	2	0	0	0	0	0	0	0	0	0	0
Otu01363	0	0	0	0	0	0	0	0	0	0	0	0	1	0	0	0	0	0	1	0	0	0	0	1	0	0	0	0	0	0	0	0	0	0	0	0	0	0	0	0	0	0	0	0	0	0	0	1	0
Otu01364	0	0	0	0	0	0	0	0	0	0	0	0	0	0	0	0	0	0	0	0	0	0	0	0	0	0	0	0	0	0	0	1	1	0	0	0	1	0	0	0	0	0	0	0	0	0	0	0	0
Otu01365	0	0	0	0	0	0	0	0	0	0	0	0	0	0	0	1	0	0	0	0	0	0	0	0	0	0	0	0	0	1	0	0	0	0	0	0	0	0	0	0	0	0	0	0	0	0	1	0	0
Otu01366	0	0	0	0	0	0	0	0	1	0	0	1	0	0	0	0	0	0	0	1	0	0	0	0	0	0	0	0	0	0	0	0	0	0	1	0	0	0	0	0	0	0	0	0	0	0	1	0	0
Otu01367	0	1	0	0	0	0	1	0	0	0	0	0	0	0	0	0	1	0	0	1	0	1	0	0	0	1	0	0	0	0	0	0	0	0	0	0	0	0	0	0	0	0	0	0	0	0	0	0	0
Otu01368	0	1	1	0	0	0	0	0	0	2	0	0	0	1	0	0	0	2	0	1	0	0	0	0	0	0	0	0	0	0	1	0	0	0	1	0	0	0	0	0	0	0	0	0	0	0	0	0	0
Otu01369	0	0	0	0	0	0	1	0	0	1	1	0	0	0	0	0	0	0	0	0	0	0	0	0	0	0	0	0	0	0	0	0	1	0	0	0	1	0	0	0	0	1	0	0	0	0	1	0	0
Otu01370	0	0	0	0	0	0	0	0	0	0	0	0	0	0	0	0	0	1	1	0	0	1	1	1	0	0	1	0	0	0	0	0	0	0	0	0	1	0	0	0	0	1	0	0	0	3	0	0	0
Otu01371	1	0	0	0	0	0	0	0	0	0	0	0	0	0	0	0	0	0	0	0	2	0	0	1	0	0	0	1	0	0	0	0	0	0	0	0	1	0	0	0	0	0	0	0	0	0	0	0	0
Otu01372	0	0	0	0	0	0	0	0	0	0	0	0	0	0	0	0	0	0	0	0	0	1	0	1	0	1	0	0	0	0	1	0	0	0	0	1	0	0	0	0	0	1	0	0	0	0	0	0	0
Otu01373	0	0	1	0	0	0	0	0	0	0	0	0	0	0	0	0	0	0	0	1	0	0	0	0	0	0	0	0	0	0	0	0	0	1	0	0	0	0	0	0	0	0	0	0	1	0	0	0	0
Otu01374	0	0	0	0	0	1	1	0	0	0	0	0	1	0	0	0	0	0	0	0	0	0	0	0	0	0	0	0	0	0	0	0	0	0	0	0	0	0	0	0	1	0	0	0	0	0	0	0	0
Otu01375	0	0	0	0	0	0	0	0	0	0	0	0	0	0	0	0	0	0	0	0	1	1	0	0	0	0	0	0	0	0	1	0	0	1	0	0	0	0	0	0	0	0	0	0	0	0	0	0	0
Otu01376	0	0	0	0	0	1	0	0	0	0	0	0	0	0	0	0	1	0	0	0	0	0	0	0	0	0	0	0	0	1	0	0	0	1	0	0	0	0	0	0	0	0	0	0	0	0	0	0	0
Otu01377	0	1	0	0	0	0	0	0	0	1	0	2	0	0	0	0	0	0	1	0	1	0	0	0	0	0	0	0	0	0	0	0	0	0	0	0	1	0	0	1	0	0	0	0	1	0	2	0	1
Otu01378	0	0	0	1	0	0	0	0	1	0	0	0	0	0	0	0	0	0	0	1	1	0	0	0	0	0	1	0	1	0	0	0	0	0	0	0	0	0	0	0	0	0	0	0	0	0	0	0	0
Otu01379	3	1	0	0	0	0	0	0	0	0	0	0	0	0	0	0	0	0	0	0	0	0	0	0	0	0	0	0	0	0	0	0	0	0	0	0	0	0	0	0	0	0	0	0	1	0	0	2	0
Otu01380	1	0	0	0	0	0	0	1	0	0	0	0	0	0	0	0	0	0	0	1	0	0	0	0	0	0	1	0	0	0	0	2	0	0	1	2	0	0	0	0	0	1	0	0	1	0	0	0	1
Otu01381	0	0	1	0	0	0	0	0	0	0	0	1	1	0	1	0	0	1	0	1	0	0	0	0	0	1	0	0	1	0	0	0	0	0	0	0	0	0	0	0	1	1	0	0	0	0	0	0	0
Otu01382	1	0	0	0	1	0	0	0	0	0	0	0	1	0	1	1	1	0	0	0	0	0	0	0	0	0	0	0	0	0	0	0	1	0	0	0	0	0	0	0	0	0	0	0	0	0	0	0	0
Otu01383	0	0	0	0	0	0	0	0	0	0	0	0	2	1	0	0	0	2	1	1	0	0	0	0	0	0	0	0	0	0	0	0	0	0	0	1	0	0	0	0	0	0	0	0	0	0	1	0	1
Otu01384	0	0	1	0	0	1	0	0	0	0	0	0	0	1	0	0	0	0	0	0	0	0	0	0	1	0	0	0	0	0	0	1	0	0	0	0	0	0	0	0	0	0	0	0	0	0	0	0	0
Otu01385	0	0	0	0	0	0	0	0	0	0	0	0	0	1	1	0	0	0	0	1	0	0	0	0	0	0	0	0	0	0	0	0	0	0	0	0	0	0	1	0	0	0	0	0	0	0	0	0	0
Otu01386	0	1	0	0	0	0	0	0	0	0	0	0	0	0	0	0	0	0	0	0	0	0	0	0	0	0	1	0	0	0	0	0	0	0	0	1	0	0	0	1	0	0	0	0	0	0	0	0	0
Otu01387	0	1	0	0	1	0	1	2	1	0	0	0	0	1	0	0	0	0	0	0	0	0	0	0	1	0	0	0	0	1	0	0	0	0	0	0	0	0	1	1	1	0	0	0	0	0	0	0	0
Otu01388	0	0	0	0	0	0	0	0	0	0	0	0	0	0	0	1	1	0	0	1	0	0	0	0	0	0	0	0	1	0	0	0	1	0	0	1	0	0	0	0	0	0	0	0	0	0	0	0	0
Otu01389	0	0	0	0	0	0	2	1	0	0	0	0	0	0	0	0	0	0	0	0	0	0	0	1	0	0	0	0	0	0	1	0	0	0	0	0	0	0	0	0	0	1	0	1	0	0	0	0	0
Otu01390	0	0	0	0	0	1	0	0	1	0	0	0	0	0	0	0	0	0	0	0	0	0	0	0	0	0	0	0	0	0	0	0	0	0	2	0	0	0	0	0	0	0	0	0	0	0	0	0	0
Otu01391	0	0	0	0	1	0	0	0	0	0	0	0	0	0	0	0	0	0	0	0	0	0	0	0	0	0	1	0	0	1	0	0	1	0	0	0	0	0	0	0	0	0	0	0	0	0	0	0	1
Otu01392	0	0	0	0	0	0	0	0	0	0	0	0	0	0	0	0	0	0	0	0	0	0	0	0	0	0	0	0	0	1	0	0	0	0	1	0	0	0	0	0	0	1	0	0	0	1	0	0	0
Otu01393	0	0	1	0	0	1	0	2	0	0	0	0	1	0	0	0	1	0	0	0	0	0	0	0	0	0	0	0	1	0	0	0	0	0	0	0	0	0	0	0	1	0	0	0	0	0	0	0	0
Otu01394	0	1	0	0	0	2	0	0	0	0	0	0	0	1	0	0	0	0	0	0	0	0	0	0	0	0	0	1	0	0	1	0	1	0	1	0	1	0	0	0	1	0	0	0	0	0	0	0	0
Otu01395	0	0	0	0	0	0	0	0	0	0	0	0	0	0	0	0	0	0	0	0	0	0	1	3	0	0	0	0	0	0	0	0	0	0	0	1	0	0	0	0	0	0	0	0	0	1	0	1	0
Otu01396	0	0	0	0	0	0	0	0	0	0	0	0	0	0	0	0	0	1	0	0	0	0	0	0	0	0	0	0	0	0	0	0	0	0	0	0	0	0	0	0	0	0	1	0	0	0	0	0	0
Otu01397	0	0	0	0	0	0	0	0	0	0	1	0	0	0	0	0	0	0	0	0	0	1	0	0	0	0	0	0	0	0	1	0	0	0	0	0	0	0	0	0	0	0	0	0	0	0	0	0	0
Otu01398	0	0	1	1	0	0	0	0	0	0	0	0	1	0	1	0	0	0	0	1	0	0	0	0	0	0	0	1	1	0	0	0	0	0	0	0	0	0	1	0	0	0	0	0	1	0	0	1	0
Otu01399	0	0	0	0	0	0	0	0	0	0	0	0	0	0	0	0	0	0	0	0	0	0	0	0	0	0	0	1	0	1	1	0	1	0	0	1	0	0	0	0	0	0	1	0	0	0	0	0	0
Otu01400	0	0	1	0	2	0	0	0	1	0	2	0	2	1	0	0	0	0	0	1	0	0	0	0	0	0	1	0	0	0	0	0	0	0	0	0	0	0	0	0	0	0	0	0	0	0	0	0	0
Otu01401	1	0	1	0	0	2	0	1	0	0	0	1	0	0	1	0	0	0	0	0	0	0	0	0	0	1	0	0	0	0	0	0	0	1	0	0	0	0	0	0	0	0	0	0	1	0	0	0	0
Otu01402	0	0	0	0	0	0	0	0	0	0	0	0	0	0	0	0	0	0	0	1	0	0	0	0	1	0	1	0	0	0	0	0	0	0	1	0	0	0	0	0	0	0	0	0	0	1	0	0	0
Otu01403	0	0	0	0	0	0	0	0	0	0	0	0	0	0	1	1	0	0	0	0	0	1	0	0	1	0	0	0	0	0	0	1	0	0	0	0	0	0	0	0	1	0	0	0	0	0	1	0	1
Otu01404	0	0	0	0	0	0	0	0	0	0	0	0	0	0	0	1	0	0	0	0	1	1	0	0	0	0	0	1	0	0	1	0	0	0	0	1	0	0	0	0	0	1	0	0	0	0	0	0	0
Otu01405	1	2	1	0	0	0	1	0	0	0	0	0	0	1	0	0	0	0	0	0	0	0	0	0	0	0	0	0	0	0	0	0	0	0	0	0	0	0	0	0	0	0	0	0	0	0	0	0	0
Otu01406	0	0	0	0	0	1	0	0	0	2	0	0	0	0	0	0	0	0	0	0	0	1	0	0	0	0	0	0	0	0	0	0	0	0	0	0	0	0	0	0	0	0	0	0	0	0	0	0	0
Otu01407	0	0	1	0	0	1	0	1	0	0	0	0	1	0	0	0	1	0	0	0	0	0	0	1	0	0	0	0	1	0	0	0	0	0	0	0	0	0	0	1	0	1	1	0	0	0	0	0	0
Otu01408	0	0	0	0	0	0	0	0	1	0	0	0	0	0	0	0	1	0	0	0	0	0	0	0	0	0	1	2	2	0	0	0	0	0	1	0	0	0	0	0	0	1	0	0	0	0	0	0	0
Otu01409	1	0	1	0	0	0	0	1	1	0	0	0	0	0	0	1	0	0	0	0	0	0	1	0	0	0	1	0	0	0	0	0	0	0	0	0	0	0	0	0	0	0	0	0	0	0	0	0	0
Otu01410	1	0	1	1	0	0	0	0	0	0	0	0	0	0	0	0	0	0	0	0	0	0	0	0	0	1	0	1	0	0	0	1	0	1	2	0	0	0	0	0	0	0	0	0	0	0	0	1	0
Otu01411	0	0	0	0	0	0	0	0	0	0	0	1	0	0	0	0	0	0	0	0	0	0	0	0	0	0	0	0	1	0	1	1	0	0	0	0	0	1	0	0	1	0	0	0	0	0	0	0	0
Otu01412	0	0	0	0	0	0	0	0	0	0	0	0	0	0	0	1	0	0	0	1	0	0	0	0	2	0	0	0	0	1	0	0	0	0	0	0	0	0	0	0	0	0	1	0	1	0	1	0	0
Otu01413	1	0	1	1	0	0	0	0	1	0	1	0	1	0	1	0	1	1	0	1	0	0	0	0	0	0	0	0	0	0	0	0	0	0	0	0	0	0	0	0	0	0	0	0	0	0	0	0	0
Otu01414	0	0	1	0	0	0	0	0	0	0	0	0	0	0	0	0	1	0	0	0	0	0	0	0	0	0	2	0	1	0	0	0	1	0	0	1	0	0	0	0	0	0	0	0	0	0	0	0	0
Otu01415	0	1	0	0	0	0	0	0	1	1	0	0	0	0	0	0	0	0	0	0	0	0	0	0	0	0	0	0	0	0	0	0	0	0	0	0	0	0	0	0	0	0	0	0	0	0	0	0	0
Otu01416	0	0	0	0	1	0	1	1	1	0	0	0	0	0	2	0	1	0	0	0	0	0	0	0	0	0	0	0	0	0	0	0	0	0	0	0	1	0	0	0	0	1	0	0	0	0	0	0	1
Otu01417	0	1	1	0	1	0	0	0	0	0	0	0	0	0	0	0	0	0	1	1	0	1	0	1	0	0	0	0	0	0	0	0	1	0	0	0	0	0	1	1	0	0	0	1	0	1	0	0	0
Otu01418	0	0	0	0	0	0	1	0	0	0	0	0	0	0	0	0	0	0	0	0	0	0	0	0	0	0	0	0	0	0	0	0	0	0	0	0	0	0	0	0	0	0	0	0	0	0	0	0	0
Otu01419	1	0	0	0	0	0	0	0	0	0	0	0	0	0	0	1	0	0	0	0	0	0	0	0	0	0	0	0	0	0	1	1	0	0	0	0	0	1	0	0	0	0	0	0	0	1	0	0	0
Otu01420	0	0	0	0	0	0	1	0	1	0	0	0	1	0	1	0	0	1	2	2	0	0	0	0	1	0	0	0	0	0	0	0	0	0	1	0	0	1	0	1	0	0	0	0	0	0	0	0	0
Otu01421	0	0	0	0	0	0	0	0	0	0	0	0	0	0	0	0	0	0	0	0	0	0	0	0	0	0	0	0	0	0	0	0	0	0	0	0	0	0	0	0	0	1	0	0	0	0	0	0	0
Otu01422	0	0	0	0	0	1	0	0	0	0	0	1	0	0	0	0	0	0	0	0	0	0	0	0	0	1	0	0	0	0	0	0	1	0	0	0	0	0	0	0	0	0	0	0	0	0	0	1	0
Otu01423	0	1	1	0	0	1	0	0	0	0	0	0	0	0	0	0	0	0	0	1	1	0	0	0	0	0	0	0	0	0	0	0	0	0	0	0	0	0	0	0	0	0	0	1	0	0	0	0	0
Otu01424	0	0	0	1	0	0	0	0	0	0	0	0	0	0	0	0	1	0	0	0	0	1	0	1	0	0	0	0	1	0	0	1	1	0	0	0	0	0	0	0	0	0	0	0	0	0	0	0	0
Otu01425	0	0	1	0	0	0	0	0	0	0	1	0	0	0	0	0	2	0	1	0	0	0	0	0	0	0	0	0	0	0	0	2	0	0	0	0	0	0	0	0	0	0	0	0	0	0	0	0	0
Otu01426	0	0	0	0	0	0	0	0	0	0	0	0	2	1	0	0	1	0	0	0	0	0	0	0	0	1	1	0	0	0	0	0	1	0	0	1	0	0	0	0	0	0	0	1	0	0	0	0	0
Otu01427	0	0	0	0	0	0	0	0	0	0	0	0	0	0	0	0	0	0	0	0	0	0	0	1	0	0	0	0	0	0	0	0	0	0	0	0	0	0	0	0	0	0	0	0	0	0	2	0	0
Otu01428	1	1	0	0	0	1	1	0	1	2	0	1	0	0	0	0	0	0	1	0	0	0	0	0	0	0	0	0	1	0	0	0	0	0	0	0	0	0	0	0	1	0	0	0	0	0	0	0	0
Otu01429	0	0	0	0	0	0	0	0	0	0	0	0	0	0	0	0	0	1	0	0	0	0	0	0	0	0	0	0	0	0	0	0	0	0	0	0	0	0	0	0	0	0	0	0	0	0	0	0	0
Otu01430	0	1	0	0	0	0	0	0	0	0	1	0	0	0	0	0	0	0	0	0	0	1	0	0	0	0	0	0	0	0	0	0	1	1	0	0	1	0	0	0	0	0	0	0	0	0	0	0	0
Otu01431	0	0	0	2	2	0	1	2	1	1	1	0	0	0	0	0	0	0	0	0	0	0	0	0	0	0	0	0	1	0	0	0	0	0	1	0	0	0	0	0	0	0	0	0	0	0	0	0	0
Otu01432	1	1	1	1	0	0	0	0	0	0	2	0	1	0	0	0	0	0	0	1	0	0	0	0	0	0	0	0	1	0	0	1	0	1	0	0	0	0	0	0	0	0	0	0	0	0	0	0	0
Otu01433	0	0	0	0	0	1	0	0	0	0	0	0	0	0	0	0	1	0	0	0	0	0	0	0	0	0	0	0	1	0	0	0	0	0	0	0	0	0	0	0	0	0	1	0	0	1	0	0	0
Otu01434	0	0	1	0	0	0	0	0	0	0	1	0	0	0	0	0	0	0	0	0	0	0	0	0	0	0	0	0	0	2	0	0	1	1	1	0	0	0	0	0	1	0	0	0	0	0	0	0	0
Otu01435	0	0	1	0	0	0	0	0	0	0	0	0	0	1	0	0	0	0	0	0	1	1	1	1	0	1	0	0	0	0	0	0	0	0	0	0	1	0	0	0	0	0	1	0	0	0	0	0	0
Otu01436	0	0	0	0	0	0	0	1	0	0	0	0	0	0	0	0	0	0	0	2	1	0	0	0	0	0	0	0	0	0	0	0	0	1	0	0	1	1	0	0	0	0	0	0	0	1	0	0	0
Otu01437	0	0	0	0	0	0	0	0	0	0	0	0	0	0	0	0	0	0	0	0	0	0	0	0	0	0	0	2	0	0	0	0	0	0	0	0	0	0	0	0	0	0	0	1	0	0	0	0	0
Otu01438	0	0	0	0	0	0	0	0	0	0	0	0	0	0	0	0	0	0	0	0	0	0	0	0	0	0	0	0	0	0	0	0	0	0	0	0	0	0	0	0	1	1	0	2	0	2	0	0	0
Otu01439	0	0	0	0	0	0	1	0	0	0	0	0	0	0	1	1	0	0	0	0	0	1	0	0	1	1	0	0	0	0	0	0	0	0	0	0	0	0	0	0	0	0	1	0	0	0	0	1	0
Otu01440	0	1	0	0	0	0	0	0	0	0	0	0	0	0	0	0	0	0	0	0	0	1	0	0	0	1	0	0	0	0	2	0	1	0	0	0	0	0	0	0	0	0	0	0	0	0	0	0	0
Otu01441	0	0	0	0	0	0	0	0	0	0	0	0	0	0	0	0	0	0	0	0	0	0	0	0	0	0	0	0	1	0	0	0	0	1	0	0	0	0	0	0	0	0	0	0	0	0	0	0	1
Otu01442	0	0	0	0	0	0	0	0	0	0	0	0	0	0	0	0	0	0	0	0	0	0	0	0	0	0	0	0	0	0	0	0	0	0	0	0	0	0	0	1	1	3	0	1	0	0	0	0	1
Otu01443	0	0	0	0	0	0	0	0	0	0	0	0	0	0	0	0	0	0	0	0	0	0	0	1	0	1	0	0	0	0	0	0	0	0	0	1	0	0	0	0	0	0	0	0	0	1	0	0	1
Otu01444	0	0	0	0	0	1	0	0	0	0	1	1	0	0	0	0	0	0	1	1	0	1	0	0	0	0	0	0	1	0	0	0	1	0	0	0	0	0	0	0	0	0	1	0	0	1	0	0	0
Otu01445	0	0	0	0	0	0	0	0	0	0	0	0	0	0	0	0	0	0	0	0	0	0	0	0	0	0	0	0	0	0	0	0	0	0	0	0	0	0	1	0	0	0	0	0	0	0	0	1	1
Otu01446	0	0	0	0	0	0	0	1	0	0	0	0	0	0	1	0	0	0	1	0	0	0	0	0	0	1	0	0	0	0	0	0	0	0	0	0	0	0	0	2	0	0	0	0	0	0	0	0	0
Otu01447	0	1	0	0	0	0	0	0	0	0	0	0	0	0	0	0	0	0	0	0	0	0	0	0	0	0	0	0	1	0	1	0	1	0	1	0	0	0	1	0	0	1	0	0	1	0	0	0	0
Otu01448	0	0	0	0	0	0	0	0	0	0	0	0	0	0	0	0	1	0	0	0	0	0	1	0	0	0	0	0	0	1	0	0	0	0	0	0	0	0	0	0	0	0	0	0	0	0	0	0	0
Otu01449	0	0	0	0	0	0	0	0	0	0	0	0	0	0	0	0	0	0	0	0	0	0	0	0	0	0	0	0	1	0	0	1	1	0	0	0	1	0	0	0	0	0	0	0	0	0	0	0	0
Otu01450	0	1	0	1	0	1	0	0	0	0	0	0	0	1	0	3	0	0	0	0	0	0	0	0	0	0	0	0	0	0	1	0	0	0	0	0	0	0	0	0	2	0	0	2	1	1	0	0	1
Otu01451	0	1	0	0	0	0	0	1	0	0	0	0	0	0	1	0	0	0	1	0	0	0	0	0	0	0	0	0	0	0	0	1	0	1	0	0	0	0	0	0	0	0	0	0	0	1	0	0	0
Otu01452	0	0	1	0	1	0	0	0	0	0	0	0	0	0	0	0	0	0	0	1	0	0	0	0	0	0	0	1	0	1	0	0	0	0	0	1	0	0	0	0	0	0	0	0	0	0	0	0	0
Otu01453	1	0	0	1	0	0	0	0	0	1	1	2	0	0	1	0	0	1	0	1	1	0	0	1	1	0	0	0	0	0	0	0	1	0	0	0	0	0	0	0	0	0	0	0	0	0	0	0	0
Otu01454	0	1	0	0	0	0	0	0	0	0	0	0	0	0	0	0	0	0	0	0	1	0	0	0	1	1	0	0	0	0	0	0	1	1	0	0	0	0	0	0	0	0	0	0	0	0	0	0	0
Otu01455	0	0	0	0	0	0	0	0	0	0	0	0	0	1	0	0	0	0	0	0	0	0	0	0	0	0	1	0	0	0	0	0	1	0	0	0	0	0	0	0	0	0	0	0	0	0	0	0	0
Otu01456	0	0	0	0	0	0	0	0	0	0	0	0	0	0	0	0	0	0	0	0	0	3	0	1	1	2	0	0	0	0	0	0	0	0	0	1	0	0	0	0	0	1	0	0	0	0	0	0	0
Otu01457	0	0	0	1	0	1	1	0	0	1	1	0	0	0	1	1	0	1	0	0	0	0	0	0	0	1	0	0	0	0	0	0	0	0	0	0	0	0	0	0	0	0	0	0	0	0	0	0	0
Otu01458	1	0	1	0	0	1	0	0	1	1	0	0	0	0	0	0	0	0	0	0	0	0	0	0	1	0	0	3	0	0	0	0	0	0	0	0	0	1	0	0	0	0	0	0	0	0	0	0	0
Otu01459	0	0	0	0	0	0	0	0	0	0	0	0	0	0	0	0	0	0	0	0	0	0	0	0	0	1	0	0	1	0	0	0	0	0	0	0	0	1	0	0	0	0	0	0	0	0	0	0	0
Otu01460	0	0	0	1	0	0	0	0	1	0	0	0	1	0	0	0	1	0	0	0	0	0	0	0	0	0	0	1	0	1	1	0	0	1	1	0	0	0	0	0	1	0	0	1	0	0	1	0	0
Otu01461	0	0	0	0	0	1	0	2	1	0	1	0	0	1	0	0	0	0	0	0	0	0	0	0	0	0	0	0	1	0	0	1	0	0	0	0	0	0	0	0	0	0	1	0	1	0	0	0	0
Otu01462	0	0	0	0	0	0	1	0	0	0	0	0	1	0	0	0	0	0	0	0	0	0	0	0	0	0	0	0	0	0	0	0	0	0	0	0	0	0	0	0	0	1	1	0	0	0	0	0	0
Otu01463	0	0	0	0	0	1	1	0	1	0	0	0	0	0	0	0	0	0	0	1	0	0	0	0	0	0	0	0	0	0	0	0	0	0	1	0	0	0	0	0	0	0	0	1	0	0	0	0	1
Otu01464	0	0	0	0	1	0	0	0	0	1	1	1	0	0	0	0	0	0	0	1	0	0	0	0	0	0	1	0	0	0	0	0	0	1	0	0	0	0	0	0	0	0	0	0	0	0	0	0	0
Otu01465	0	1	1	0	1	1	0	0	0	0	0	0	0	0	0	0	0	0	0	0	0	0	0	0	0	0	0	1	1	1	0	0	0	0	0	0	0	0	0	0	0	0	0	0	0	0	0	0	0
Otu01466	0	0	1	1	0	1	0	1	0	0	0	0	0	0	0	0	0	1	0	0	0	0	0	0	0	0	0	0	2	0	0	1	0	0	1	0	1	0	0	0	0	0	0	0	0	0	0	0	0
Otu01467	0	0	2	0	0	1	1	0	0	0	0	1	0	0	0	0	0	2	0	0	0	0	0	0	0	0	0	0	3	0	1	0	1	0	0	0	0	0	0	0	0	0	0	0	0	0	0	0	0
Otu01468	0	0	0	0	0	0	0	0	0	0	0	0	0	0	0	0	0	0	0	0	0	0	0	0	0	0	0	0	0	0	0	0	0	0	0	0	0	0	0	0	0	0	0	0	0	0	0	0	0
Otu01469	0	0	0	1	0	0	0	0	0	0	1	1	1	0	0	1	0	0	0	0	0	0	0	0	0	0	0	0	1	0	0	0	0	0	0	0	0	0	0	1	0	1	0	0	0	0	1	0	0
Otu01470	0	0	0	0	0	0	0	1	0	0	0	0	0	0	1	0	0	0	0	0	0	0	0	0	0	0	0	0	0	0	0	0	0	0	0	0	0	0	0	0	0	0	0	0	1	0	1	0	0
Otu01471	0	0	1	0	0	0	0	0	0	0	0	0	0	0	0	0	0	0	2	0	0	0	0	0	0	0	0	0	1	1	1	1	0	1	0	1	0	0	0	0	1	0	0	0	0	0	0	0	0
Otu01472	0	0	0	0	0	1	0	0	0	1	0	1	0	0	0	0	0	0	0	0	0	0	0	0	0	0	1	0	0	0	0	0	0	0	0	0	0	0	0	0	0	1	0	0	0	0	0	0	0
Otu01473	0	0	0	0	0	0	0	0	0	0	0	0	0	0	0	0	0	0	0	0	0	0	0	0	0	0	0	0	0	0	0	0	0	0	0	0	0	0	0	0	0	0	0	0	0	0	0	0	0
Otu01474	0	0	0	0	0	0	0	0	0	0	0	0	0	0	0	0	0	0	0	0	0	1	0	0	0	0	1	0	0	0	0	0	0	0	1	0	0	0	0	0	0	0	0	0	0	0	0	1	1
Otu01475	2	0	0	0	1	1	0	0	0	1	1	0	0	2	0	0	0	0	0	2	0	0	0	0	0	0	0	0	0	0	0	0	0	0	0	0	0	0	0	0	0	0	0	0	0	0	0	1	0
Otu01476	0	0	0	0	0	0	0	0	0	0	0	0	0	0	0	0	0	0	0	0	0	0	0	0	0	0	0	0	0	0	0	0	0	1	0	0	0	0	0	0	0	0	0	0	0	0	0	0	0
Otu01477	0	0	0	0	0	0	0	0	0	0	0	0	0	0	0	0	0	0	0	0	0	0	0	0	0	0	0	0	0	0	0	0	0	0	0	0	0	0	3	1	0	1	0	2	1	1	2	0	0
Otu01478	0	0	0	0	0	0	0	0	0	0	0	0	0	0	0	0	0	0	1	1	1	0	0	0	0	1	0	0	0	0	0	0	1	0	0	1	0	1	0	0	0	0	0	0	0	0	0	0	0
Otu01479	0	0	0	0	0	0	0	0	0	0	0	0	0	0	0	0	0	0	0	0	1	1	1	2	1	1	0	0	0	0	0	0	0	0	0	0	0	0	0	0	0	0	0	0	0	0	0	0	0
Otu01480	0	0	0	0	0	0	0	0	0	0	0	0	0	0	0	0	0	0	0	0	0	0	0	0	0	0	0	0	0	0	0	0	0	0	0	0	0	0	0	0	0	0	0	0	0	0	0	0	0
Otu01481	0	0	0	0	0	0	0	0	0	1	0	1	0	0	0	0	0	0	0	0	0	0	0	0	0	0	0	0	0	0	0	0	0	0	0	0	0	0	0	0	0	0	0	0	0	0	0	0	0
Otu01482	0	0	0	0	0	0	0	0	0	0	0	0	0	0	0	0	0	0	0	1	1	0	1	0	1	0	0	0	0	0	0	0	0	0	0	0	0	0	0	1	0	0	0	0	0	0	0	0	0
Otu01483	0	0	1	0	0	0	0	0	0	0	0	0	2	0	0	0	0	0	0	0	0	1	0	0	0	0	0	0	0	2	0	0	0	0	1	0	0	0	0	0	0	0	0	0	0	0	0	0	0
Otu01484	0	0	0	0	0	0	0	0	0	0	0	0	0	0	0	0	0	0	0	0	0	1	2	1	1	0	0	0	0	0	0	0	0	0	0	0	0	0	0	0	0	0	0	0	0	0	0	0	0
Otu01485	0	0	0	0	0	0	0	0	0	0	0	0	0	0	0	0	0	0	0	0	0	0	0	0	0	0	0	0	0	0	0	0	0	0	0	0	0	0	0	1	0	0	0	0	0	0	0	0	0
Otu01486	0	0	0	0	0	0	0	0	0	0	0	0	0	0	0	0	1	0	0	1	0	1	0	0	0	0	0	0	0	0	0	0	0	0	0	0	0	0	0	0	0	1	0	0	0	0	0	0	0
Otu01487	0	0	0	0	0	1	0	0	0	0	0	0	0	0	0	0	0	0	2	0	0	0	0	0	0	0	0	0	0	0	1	0	0	0	0	0	0	0	0	0	0	0	0	0	0	0	1	0	0
Otu01488	0	1	0	0	0	0	0	0	0	1	0	0	0	1	1	0	1	0	0	0	0	0	0	0	0	0	0	0	0	0	0	0	0	0	0	0	0	1	0	0	0	1	0	0	0	0	0	0	1
Otu01489	0	0	0	0	0	0	0	0	0	0	0	0	0	0	0	0	0	0	0	0	1	0	0	0	0	1	0	0	0	0	0	0	0	0	0	1	0	0	0	0	0	0	0	0	0	0	0	0	0
Otu01490	0	0	0	0	0	0	0	0	1	0	0	0	0	0	0	0	0	0	1	1	0	0	0	0	0	0	0	0	0	0	0	0	0	0	1	0	0	0	0	0	0	0	0	0	0	0	0	0	0
Otu01491	0	1	0	0	0	0	0	0	0	0	1	0	1	0	0	0	0	0	0	0	0	0	0	0	0	0	1	0	0	0	0	0	1	0	0	0	0	0	1	0	0	1	0	0	0	0	1	0	0
Otu01492	0	0	0	0	0	0	0	0	0	0	0	0	0	1	0	0	0	0	0	0	0	0	0	0	0	0	0	0	0	0	0	0	0	0	0	0	0	0	0	0	0	0	0	0	0	0	0	0	0
Otu01493	0	0	0	0	0	0	0	0	0	1	0	0	0	0	0	0	0	0	0	0	0	0	1	0	0	0	0	0	0	0	0	0	0	1	1	0	0	0	0	0	0	0	1	0	0	0	0	0	0
Otu01494	0	0	0	1	0	0	0	0	0	0	1	0	0	0	0	0	0	0	1	1	0	0	0	0	0	0	0	0	0	0	0	0	0	1	0	1	0	0	0	0	0	0	0	0	0	0	0	0	1
Otu01495	0	1	1	0	0	0	0	1	0	0	0	0	0	0	0	0	0	0	0	0	0	1	0	0	0	0	1	0	0	0	0	0	0	0	1	0	0	1	0	0	0	0	0	0	0	0	0	0	0
Otu01496	1	0	0	0	0	0	0	0	0	0	0	0	0	0	0	1	0	0	0	0	0	0	0	0	1	1	0	0	0	0	0	0	0	0	0	0	0	0	0	1	0	0	0	0	0	0	0	0	1
Otu01497	0	0	0	0	1	1	1	0	0	0	0	0	0	0	0	1	0	0	0	0	0	0	0	0	0	0	1	0	0	0	0	0	0	0	0	0	0	0	1	0	0	0	0	0	0	0	0	0	0
Otu01498	1	0	0	0	0	0	2	0	0	0	0	0	0	0	1	0	0	0	0	1	0	0	0	0	0	0	0	0	0	1	0	0	0	0	0	1	0	0	0	0	0	0	0	0	1	1	0	0	0
Otu01499	0	0	0	0	0	0	0	0	0	0	0	1	1	0	0	0	0	1	0	0	0	1	0	0	1	0	0	0	1	0	1	0	0	0	0	0	0	0	1	0	0	0	0	0	0	0	0	0	0
Otu01500	0	0	0	0	0	1	0	0	0	0	0	0	0	0	0	0	0	1	0	0	0	0	0	0	0	1	0	0	0	0	0	0	0	0	0	0	0	0	0	0	0	0	0	1	0	0	0	0	0
Otu01501	0	0	0	0	0	0	0	0	0	0	0	0	0	0	0	0	0	1	0	0	0	0	1	0	1	1	0	0	0	0	0	0	0	0	0	0	1	0	0	0	0	1	0	0	0	0	0	0	0
Otu01502	0	0	0	0	0	0	0	0	1	0	0	0	1	0	0	1	0	0	0	0	1	0	0	0	0	1	0	0	0	1	0	1	0	0	0	0	0	0	0	0	0	0	0	0	0	0	0	0	0
Otu01503	0	0	0	0	0	0	0	0	0	0	0	0	0	0	0	0	0	0	0	0	1	0	1	2	0	0	0	0	0	0	1	0	0	0	0	0	0	0	0	0	0	0	0	0	1	0	0	0	1
Otu01504	0	1	0	0	0	1	0	0	0	0	0	0	1	0	0	0	1	1	0	0	1	1	0	1	0	0	0	0	0	0	0	0	0	0	1	0	0	0	0	0	0	0	0	0	0	0	0	0	0
Otu01505	0	0	0	0	0	0	0	0	0	0	0	0	0	0	0	0	0	0	0	0	0	0	0	0	0	0	0	0	0	0	0	0	0	1	0	1	0	0	0	0	0	0	0	0	0	0	0	0	0
Otu01506	0	0	0	0	0	0	0	1	0	0	1	0	0	0	0	0	0	0	0	1	0	0	0	0	0	0	0	0	0	1	0	0	0	0	0	1	0	0	0	0	1	0	0	0	2	0	0	0	1
Otu01507	0	1	0	0	0	0	0	0	1	0	0	0	0	0	0	0	0	0	0	1	0	1	0	0	0	0	0	0	1	0	1	0	0	0	0	0	0	0	0	0	0	0	0	0	0	0	0	0	0
Otu01508	1	0	1	0	0	1	0	1	1	0	0	0	0	0	0	0	0	0	1	0	0	0	0	0	0	0	0	0	0	0	0	0	1	0	0	0	1	0	0	0	0	0	0	0	0	0	0	1	0
Otu01509	0	0	1	1	0	1	0	1	0	1	0	0	0	1	0	0	0	0	1	1	0	1	0	0	0	0	0	0	0	0	1	0	0	0	0	0	0	0	0	0	0	0	0	0	0	0	0	0	0
Otu01510	0	0	0	0	0	0	1	0	0	0	0	0	0	0	0	0	0	0	0	1	1	0	0	0	0	0	0	0	1	0	0	0	0	0	0	0	0	0	0	0	0	0	0	0	0	1	0	0	0
Otu01511	0	0	0	0	0	0	0	0	0	0	0	0	0	0	1	1	0	0	0	0	0	0	0	0	0	0	0	0	0	0	1	1	0	0	0	0	0	0	0	0	0	0	0	0	0	0	1	0	0
Otu01512	0	0	0	0	0	0	1	0	0	0	1	0	0	0	1	0	0	0	0	0	0	0	0	0	0	0	0	0	0	0	0	0	0	0	0	0	1	0	0	0	0	0	0	0	0	0	0	0	0
Otu01513	0	1	1	0	1	0	0	0	0	0	0	0	0	0	0	0	1	0	0	0	0	0	0	0	0	1	0	0	1	0	0	0	0	0	0	0	0	0	0	0	0	1	0	1	0	0	0	0	0
Otu01514	0	0	0	0	3	0	1	1	0	0	0	0	0	0	0	0	0	0	0	0	0	0	0	0	0	0	0	0	0	0	0	0	2	0	0	0	0	0	0	0	0	0	0	0	0	0	0	0	0
Otu01515	0	0	0	0	0	0	0	0	0	0	0	0	0	0	0	0	0	0	0	1	0	0	0	0	0	0	1	0	1	1	0	0	0	0	0	0	0	0	1	0	0	0	0	0	0	0	0	0	0
Otu01516	0	0	0	0	0	0	0	0	0	1	0	1	0	0	0	1	0	0	0	0	0	0	0	0	0	0	1	0	1	1	0	0	0	0	1	0	0	0	0	0	0	0	0	0	0	0	0	0	0
Otu01517	0	0	0	0	0	0	0	0	0	1	0	0	0	0	0	0	0	0	0	0	0	0	0	0	0	0	0	0	0	0	0	0	0	0	0	0	0	0	0	0	0	0	0	0	0	0	0	2	1
Otu01518	0	0	0	0	0	0	0	0	0	0	0	0	0	0	0	0	1	0	0	0	0	0	0	0	0	0	0	0	0	0	0	0	0	0	0	1	0	0	1	0	0	0	0	0	0	0	0	1	0
Otu01519	0	0	0	0	0	0	0	0	0	0	0	0	0	0	0	0	0	0	0	0	0	0	0	0	0	0	0	0	0	0	0	0	0	0	0	0	0	0	1	0	0	1	2	2	0	1	1	1	0
Otu01520	1	0	0	1	0	0	0	0	0	1	1	0	0	0	0	0	0	0	0	0	0	0	0	1	0	0	0	0	0	0	1	0	0	0	0	0	0	0	0	0	1	0	0	0	1	0	0	0	0
Otu01521	0	0	0	1	0	0	0	0	1	0	0	0	1	0	0	0	1	0	0	0	0	0	0	0	0	0	0	0	0	0	0	0	0	0	0	0	0	0	0	0	0	0	0	0	0	0	0	0	0
Otu01522	0	0	0	0	0	0	0	0	0	0	0	0	0	0	0	0	0	1	0	0	0	0	0	0	0	0	0	0	0	1	0	0	0	0	0	0	0	0	0	0	1	0	0	0	1	0	0	0	0
Otu01523	0	0	0	1	0	0	0	0	0	0	0	0	0	0	0	0	0	0	0	0	0	0	0	0	0	0	0	0	0	0	1	0	0	0	0	0	0	0	0	0	0	0	0	0	1	1	0	0	0
Otu01524	1	0	0	0	0	0	0	0	1	0	0	0	0	1	0	0	0	0	0	0	0	0	0	0	1	0	0	0	0	0	0	0	2	0	0	0	0	0	0	0	1	0	0	0	0	0	0	0	0
Otu01525	0	0	0	0	0	0	0	0	0	0	0	0	0	1	0	0	0	0	1	0	0	2	0	0	0	0	0	0	1	0	0	0	0	0	0	0	0	0	0	0	0	0	0	0	1	0	0	0	0
Otu01526	0	0	0	0	0	0	0	0	0	0	0	0	0	0	0	0	0	0	0	0	0	0	0	0	0	0	0	0	0	0	0	0	0	0	0	0	0	0	0	0	0	1	2	0	0	0	2	0	0
Otu01527	0	0	0	0	0	0	1	0	0	0	1	0	0	0	0	0	0	0	0	0	0	0	0	0	0	0	0	0	0	0	1	0	0	0	0	0	1	1	0	0	0	0	1	0	1	0	0	0	0
Otu01528	0	0	1	0	0	0	0	0	0	0	0	0	0	0	0	0	0	0	0	0	1	0	0	0	0	0	0	0	0	0	1	1	0	0	1	0	0	0	0	0	0	0	0	0	0	0	0	0	0
Otu01529	0	0	0	0	1	0	0	0	0	0	0	0	0	2	0	1	0	0	0	1	1	1	0	0	0	0	0	0	0	0	0	1	0	0	0	0	0	0	0	0	0	0	0	0	0	0	0	0	0
Otu01530	0	0	0	1	0	0	0	0	0	0	0	0	0	0	0	0	0	0	0	0	0	0	0	0	0	0	0	0	0	0	0	0	0	0	0	0	0	0	1	0	0	0	0	0	0	0	0	0	0
Otu01531	0	0	0	0	0	0	0	0	0	0	0	0	0	0	0	0	0	0	0	0	0	0	0	0	0	0	0	0	0	1	0	1	0	0	0	0	0	0	0	0	0	0	0	0	0	1	0	0	1
Otu01532	1	0	0	1	0	0	1	0	0	0	0	0	0	0	0	0	0	0	0	1	0	0	0	0	0	0	0	0	0	0	0	0	1	0	0	1	0	0	0	0	0	0	0	0	0	0	0	0	1
Otu01533	0	0	0	0	0	2	0	0	0	0	0	1	0	0	0	0	0	0	0	0	0	0	0	0	0	0	0	0	0	2	0	1	0	1	0	0	0	0	0	0	0	0	0	0	0	0	0	0	0
Otu01534	0	0	0	0	0	0	0	0	0	0	0	0	0	0	0	0	0	0	0	0	0	0	0	0	0	0	0	0	0	0	0	0	0	0	0	0	0	0	0	0	0	0	0	1	0	0	0	0	0
Otu01535	1	0	0	0	0	1	0	0	0	0	0	0	1	0	0	0	1	0	0	0	0	0	0	0	0	0	0	0	0	0	0	0	1	0	0	0	0	0	0	0	1	0	0	0	0	0	0	0	0
Otu01536	1	0	0	0	0	0	0	0	0	0	0	0	0	0	0	0	0	0	0	1	0	0	0	0	0	0	0	0	0	0	0	0	0	0	0	0	0	0	0	0	1	0	0	0	0	0	0	0	0
Otu01537	0	0	0	0	0	0	0	0	0	0	0	0	0	0	0	0	0	0	0	0	1	0	1	0	4	0	0	0	0	0	0	0	0	0	0	0	0	0	0	0	0	1	0	0	0	1	0	0	0
Otu01538	0	0	0	0	0	0	0	0	0	0	0	0	0	0	0	0	0	0	0	0	0	0	0	0	0	0	0	0	0	0	0	0	0	0	0	0	0	0	0	1	2	0	1	1	0	0	0	0	0
Otu01539	0	0	0	0	0	0	0	0	0	0	0	1	0	0	0	0	0	0	0	0	0	1	0	0	1	0	0	0	0	0	0	0	0	0	0	0	0	0	0	0	0	0	0	0	0	0	3	0	0
Otu01540	1	1	0	0	1	0	0	0	0	0	0	0	0	0	0	0	0	1	0	0	0	0	0	0	0	0	1	0	0	2	0	0	0	0	0	0	0	0	0	0	0	0	0	0	0	1	0	0	0
Otu01541	0	0	0	0	0	0	0	0	0	0	1	0	0	0	0	0	0	0	0	0	0	1	0	0	0	0	1	0	0	1	0	0	0	1	0	1	0	0	0	0	0	0	0	0	1	0	0	0	0
Otu01542	0	0	0	0	1	1	0	0	0	0	0	0	0	0	1	0	1	0	0	0	0	0	0	0	0	0	0	0	1	0	0	0	0	0	0	0	0	0	0	1	1	0	0	0	0	1	0	0	0
Otu01543	0	1	0	0	0	0	1	0	1	1	0	1	0	0	0	0	0	0	0	0	0	0	0	0	0	1	0	0	1	0	0	0	0	0	0	1	0	0	0	0	1	0	0	0	0	0	0	0	0
Otu01544	0	0	0	0	0	0	0	0	0	0	0	0	0	0	0	0	0	0	0	0	0	0	0	0	0	0	0	0	0	0	0	0	0	0	0	0	0	0	0	0	0	0	0	1	0	0	0	0	0
Otu01545	0	0	0	0	0	0	0	1	0	0	0	0	0	0	0	1	0	0	0	0	0	0	0	0	0	0	0	0	0	0	0	1	1	2	0	1	0	0	0	0	0	0	0	0	0	0	0	0	0
Otu01546	0	0	0	0	0	0	0	0	0	0	0	0	0	0	0	0	0	0	0	0	1	0	0	1	0	0	0	0	0	0	0	0	0	0	0	0	0	1	0	0	0	0	0	0	0	0	1	1	0
Otu01547	0	0	0	1	0	0	0	1	0	0	0	0	0	2	1	0	0	0	0	0	0	0	0	0	0	0	1	0	1	0	0	0	0	0	0	0	0	0	0	0	1	0	0	0	0	0	0	0	0
Otu01548	1	0	0	0	0	0	0	0	0	0	0	0	0	0	1	0	1	0	0	0	0	0	1	0	0	0	0	0	0	0	0	0	0	0	0	0	0	0	1	0	0	0	0	1	0	0	0	0	0
Otu01549	0	0	1	0	0	0	0	0	0	0	1	0	1	0	0	0	0	0	0	0	0	1	1	0	0	1	0	0	0	0	0	0	2	0	0	0	0	0	0	0	0	0	0	0	0	1	0	0	0
Otu01550	0	0	0	0	0	0	1	0	1	1	0	0	1	1	0	0	1	1	2	0	0	0	0	0	0	0	0	0	0	0	0	0	0	0	0	0	1	0	0	0	0	0	0	0	0	0	0	0	0
Otu01551	0	0	3	1	0	1	0	0	1	0	1	0	0	0	0	0	0	0	0	0	0	1	0	0	0	0	0	0	0	0	0	0	0	0	0	0	0	0	0	0	0	0	0	0	0	0	0	0	0
Otu01552	0	0	1	1	0	0	0	0	0	0	0	0	1	0	0	0	0	0	0	0	0	0	0	0	0	0	0	0	0	0	0	0	0	0	0	0	0	1	0	0	0	0	0	0	1	0	0	0	0
Otu01553	0	0	0	0	0	0	0	0	0	0	0	0	0	0	0	1	0	0	0	0	1	0	0	0	1	0	0	0	0	0	0	0	0	0	0	1	0	0	0	0	0	0	0	0	0	0	0	1	0
Otu01554	0	0	0	0	0	0	0	0	1	0	0	0	0	0	0	0	0	0	0	0	1	1	0	0	0	0	0	0	0	0	0	0	0	0	0	0	0	0	0	0	0	0	0	0	0	1	0	0	1
Otu01555	0	0	0	0	0	0	1	1	0	0	0	0	0	0	0	0	0	0	1	0	0	0	0	0	0	0	0	0	0	0	0	0	0	0	0	1	0	0	3	0	0	0	0	0	0	0	1	0	0
Otu01556	1	0	0	0	0	0	0	0	1	0	0	1	0	0	0	0	0	0	0	0	0	0	0	0	0	0	0	0	0	0	0	1	0	0	0	0	0	0	0	0	0	0	0	0	0	0	0	1	1
Otu01557	0	0	0	0	0	1	1	0	0	1	0	0	0	0	0	0	0	0	0	1	0	1	0	0	1	0	1	0	0	0	0	0	1	0	0	1	0	0	0	0	0	0	0	0	0	0	0	0	0
Otu01558	0	0	0	0	0	0	0	0	0	0	0	0	0	0	0	0	0	0	1	0	0	0	0	0	0	0	0	1	1	0	0	0	0	0	0	0	0	0	0	0	1	1	0	0	0	0	0	0	0
Otu01559	0	0	0	0	0	0	0	0	0	0	0	0	0	0	0	0	0	0	0	0	1	0	0	0	0	0	0	0	1	0	0	0	1	0	0	0	0	0	0	0	0	0	0	1	0	0	0	1	0
Otu01560	0	0	0	2	0	0	2	0	0	0	0	0	0	0	0	0	0	0	0	0	0	0	0	0	0	0	0	0	0	0	0	0	0	0	0	0	0	0	0	1	1	0	0	0	0	0	0	0	0
Otu01561	0	1	1	0	0	0	0	1	0	0	1	0	0	0	0	0	0	0	0	0	1	0	0	0	0	0	0	0	0	0	0	0	0	0	0	0	0	0	0	0	2	1	0	0	1	0	0	0	0
Otu01562	0	0	0	0	0	0	0	1	0	1	0	0	0	0	1	0	0	0	0	0	0	0	0	0	0	0	0	0	0	0	0	0	0	0	0	0	0	0	0	1	0	0	0	0	0	0	0	0	0
Otu01563	0	0	3	0	0	0	0	2	0	0	0	0	0	0	0	0	0	0	0	0	0	0	0	0	0	0	0	0	0	0	0	0	0	0	0	0	0	2	0	0	0	0	0	0	0	0	0	0	0
Otu01564	0	0	0	0	1	0	0	0	0	0	0	0	0	0	0	0	0	1	0	0	0	0	0	0	0	0	0	1	0	0	0	0	0	1	0	0	0	0	0	0	0	0	0	0	0	0	0	0	0
Otu01565	0	0	1	0	0	1	0	0	0	0	0	0	0	0	0	0	0	0	0	0	0	0	0	0	0	0	2	0	1	0	0	0	0	0	0	0	0	1	0	0	1	0	1	0	0	0	0	0	0
Otu01566	0	2	0	1	1	0	0	0	0	0	0	0	0	1	0	0	0	0	0	0	0	0	0	0	0	0	0	0	0	0	0	0	0	2	0	0	0	0	0	0	0	0	0	0	0	0	0	0	0
Otu01567	0	0	0	1	0	0	0	0	0	0	0	0	0	0	1	0	0	0	0	0	0	0	0	1	0	0	0	0	0	0	0	0	0	0	0	0	1	0	1	0	0	0	0	0	0	0	0	0	0
Otu01568	0	0	0	0	0	0	0	0	0	0	0	0	0	0	0	1	0	0	0	0	0	0	0	0	0	1	0	0	0	0	0	0	0	0	0	0	0	0	0	1	0	0	0	0	0	0	1	0	0
Otu01569	0	0	0	0	0	0	0	0	0	0	0	0	0	0	0	0	1	0	0	0	0	0	0	0	0	0	0	0	0	0	1	0	0	1	0	0	0	1	1	0	0	0	0	0	0	0	0	0	0
Otu01570	1	0	0	0	1	0	0	0	0	0	0	1	0	0	0	0	0	0	0	0	0	0	0	0	0	0	0	0	0	1	0	1	1	0	0	0	1	0	0	0	0	1	0	0	0	0	2	0	0
Otu01571	0	0	0	0	0	0	0	0	0	0	0	0	0	0	0	0	0	0	0	0	1	0	0	0	0	0	0	0	0	0	0	0	0	0	1	0	0	2	0	0	0	0	0	0	0	1	0	0	0
Otu01572	0	1	0	0	0	0	0	0	0	0	0	0	0	0	0	0	0	0	0	0	0	0	0	0	0	0	0	0	0	1	0	0	0	2	0	0	1	0	0	0	0	0	0	0	0	0	0	0	0
Otu01573	0	0	0	0	0	0	0	0	0	0	0	0	0	0	0	0	0	1	0	0	0	0	0	0	0	0	0	0	0	0	0	0	0	1	0	0	0	0	0	0	0	1	0	0	0	0	0	0	0
Otu01574	1	1	0	0	1	0	1	0	0	0	1	0	0	0	0	0	0	0	1	1	0	0	0	0	0	0	0	0	0	0	0	1	2	1	0	0	0	0	0	0	0	0	0	0	0	0	0	0	0
Otu01575	0	0	0	0	0	0	0	0	0	0	0	0	0	0	0	0	1	0	0	0	0	0	0	0	1	0	0	0	0	0	0	0	0	0	0	0	0	0	0	1	0	0	0	0	0	0	0	0	0
Otu01576	0	0	0	0	0	0	0	0	1	0	0	1	0	0	0	0	0	0	0	0	0	0	0	0	0	0	0	0	0	0	0	1	0	0	0	0	0	1	1	0	0	0	0	0	0	0	0	0	0
Otu01577	0	0	0	0	0	0	0	0	0	0	0	0	0	0	0	1	0	0	0	0	0	0	0	0	0	0	0	0	0	0	0	0	0	1	0	0	0	0	0	0	0	0	0	0	0	0	0	0	0
Otu01578	0	0	0	0	0	1	0	1	0	0	1	0	0	0	0	0	0	0	0	1	0	0	0	0	0	0	0	0	0	1	0	0	0	0	0	0	1	0	0	0	0	1	0	0	0	0	0	0	0
Otu01579	0	0	0	0	0	0	0	0	0	0	0	0	0	0	0	0	0	0	0	0	0	0	0	0	0	0	0	0	0	0	0	0	0	0	0	0	0	0	1	1	1	0	2	1	0	0	0	1	0
Otu01580	1	1	0	1	0	0	1	0	0	0	0	0	0	1	0	0	1	0	0	0	0	0	0	0	0	0	0	0	0	0	0	0	0	1	0	0	0	1	0	0	0	0	1	0	0	0	0	0	0
Otu01581	0	0	0	0	1	0	0	0	0	1	0	1	0	0	0	0	0	0	0	0	0	0	0	0	0	0	0	0	0	0	0	0	0	0	0	0	0	0	0	0	0	1	0	0	0	0	0	0	0
Otu01582	1	0	0	0	0	0	0	0	0	0	0	0	0	0	0	0	0	0	0	0	0	0	0	1	0	0	0	0	0	0	0	0	1	0	0	1	0	1	0	1	0	0	0	0	0	0	0	0	0
Otu01583	0	0	2	0	0	0	1	0	0	0	0	0	0	0	0	1	0	0	0	0	0	0	0	0	0	0	0	0	0	0	0	0	0	0	0	1	0	0	0	0	0	0	0	0	0	0	0	0	0
Otu01584	0	0	0	0	0	0	0	0	1	0	0	0	0	0	0	0	0	1	0	0	0	0	0	0	0	1	0	0	1	0	0	0	0	0	1	0	0	0	0	0	1	0	0	0	0	0	0	0	0
Otu01585	0	1	2	0	0	0	0	0	0	0	0	1	2	0	0	0	0	0	1	1	0	0	0	0	1	0	1	0	0	0	0	0	0	0	0	0	0	0	0	0	0	1	0	0	0	0	0	0	0
Otu01586	0	0	0	0	0	0	0	0	0	1	0	0	0	0	0	0	0	0	0	1	0	1	0	0	0	0	0	0	1	0	0	0	1	0	0	1	0	0	0	0	0	0	0	0	0	0	0	0	0
Otu01587	0	1	0	0	0	0	0	0	0	0	0	0	0	0	1	0	0	0	0	0	0	0	0	0	0	0	0	0	0	0	0	1	0	0	1	0	1	0	0	0	0	0	0	0	0	1	0	0	0
Otu01588	0	0	0	0	0	0	0	0	0	0	0	0	0	0	0	1	0	0	0	1	0	0	0	0	0	0	0	0	0	0	0	0	0	0	0	0	0	0	0	0	0	0	0	0	0	0	0	0	0
Otu01589	0	0	0	0	0	0	0	0	0	0	0	0	0	0	0	0	0	0	0	0	0	0	0	0	0	0	0	0	0	0	0	0	0	0	0	0	0	0	0	0	1	1	0	0	0	0	0	1	0
Otu01590	0	0	2	0	0	0	0	0	0	0	0	0	0	0	0	0	0	0	0	0	0	0	0	0	0	0	0	0	0	0	0	0	0	0	0	0	0	0	0	0	0	0	0	0	1	0	0	0	1
Otu01591	0	0	0	0	0	0	0	0	0	0	0	0	0	0	0	0	0	0	0	0	0	0	0	0	1	0	0	0	0	0	0	0	0	0	0	0	0	0	0	0	0	0	0	0	0	0	0	0	0
Otu01592	0	1	0	0	0	1	2	0	0	0	0	0	0	0	0	0	0	0	0	0	0	0	0	0	0	1	0	0	0	0	0	0	0	0	0	0	0	0	1	0	0	0	0	0	0	0	0	0	0
Otu01593	0	0	0	1	0	0	0	0	0	0	0	0	0	0	0	0	0	0	1	0	0	0	0	0	0	0	0	1	0	0	0	0	0	0	0	0	1	1	0	0	0	0	1	0	0	0	0	0	0
Otu01594	0	0	1	0	0	0	0	0	0	0	0	0	0	0	0	0	0	0	0	0	0	0	0	0	0	0	0	0	0	0	0	0	0	0	0	0	0	0	0	0	0	0	0	1	0	0	0	0	0
Otu01595	0	0	0	0	1	0	1	0	0	0	0	0	0	0	0	0	0	0	1	0	0	0	0	0	0	1	0	0	0	0	0	0	0	0	0	0	0	0	1	0	0	1	0	0	0	1	0	0	1
Otu01596	0	0	0	0	0	0	0	0	0	0	0	0	0	0	0	0	0	0	0	0	2	0	1	0	1	0	0	0	0	0	0	0	1	0	0	0	0	0	0	0	0	0	0	0	0	0	0	0	1
Otu01597	0	0	0	0	0	0	0	0	0	1	0	0	0	0	0	0	1	0	0	0	0	0	0	0	0	0	1	1	1	0	0	0	1	0	0	1	0	0	0	0	0	0	0	0	0	0	0	0	0
Otu01598	0	0	0	0	0	0	0	0	0	0	0	0	0	0	0	0	0	0	0	0	0	0	0	0	1	0	0	0	0	1	0	0	0	0	1	0	0	0	0	0	0	0	0	0	0	0	1	0	0
Otu01599	0	0	0	0	0	0	0	0	0	0	0	0	0	0	0	0	0	0	0	0	0	0	0	0	1	0	0	1	0	0	0	0	0	1	0	0	0	0	0	0	0	0	0	0	0	0	0	0	0
Otu01600	0	0	0	1	0	1	0	0	0	1	0	0	0	0	0	0	0	0	0	0	0	0	0	0	1	0	0	0	0	1	0	0	0	0	1	1	0	0	0	0	0	0	0	0	0	0	0	0	0
Otu01601	0	0	0	0	0	1	0	2	0	0	0	0	0	0	0	0	1	0	0	0	0	0	0	0	1	0	0	0	0	0	1	0	0	0	1	0	0	0	0	0	0	0	0	0	0	0	0	0	0
Otu01602	0	0	0	0	0	0	0	0	1	0	0	0	0	0	0	0	1	0	0	0	0	0	0	0	0	0	0	0	0	0	0	0	0	0	0	0	0	0	0	0	0	0	0	0	0	0	0	0	0
Otu01603	0	0	0	0	0	1	1	1	0	0	0	0	1	0	0	0	0	0	0	0	0	0	0	0	0	0	0	0	0	0	0	0	0	0	0	0	0	0	2	0	0	1	1	0	0	0	0	0	0
Otu01604	0	0	0	0	0	0	0	0	0	0	0	0	0	1	0	0	0	0	0	0	1	0	0	0	0	0	0	0	0	0	3	0	0	0	0	0	0	0	0	0	0	0	0	0	0	0	0	0	0
Otu01605	0	0	0	0	0	0	0	0	0	0	0	0	0	0	0	0	0	0	0	0	0	0	0	0	0	0	0	0	0	0	0	0	0	0	0	0	0	0	0	2	3	1	0	1	0	1	1	0	0
Otu01606	0	1	0	0	0	0	0	0	0	0	0	0	0	0	0	0	0	0	0	0	0	1	0	0	0	1	0	0	0	0	1	0	0	0	0	0	1	0	1	0	0	0	0	0	1	0	0	0	0
Otu01607	0	0	0	0	0	0	0	0	0	0	0	0	0	0	0	0	0	0	0	0	0	0	0	0	0	0	0	0	0	0	0	0	0	0	0	0	0	0	3	1	1	2	0	0	0	0	0	0	0
Otu01608	0	1	0	0	0	0	0	0	1	0	0	0	0	0	1	0	0	0	2	0	0	0	0	0	0	0	0	0	0	0	0	0	0	0	0	0	0	0	0	0	0	0	0	0	0	0	0	0	0
Otu01609	0	0	0	0	0	0	0	0	0	0	0	0	0	0	0	0	0	1	0	0	0	0	0	0	0	0	0	0	0	0	0	0	0	0	0	0	0	1	0	0	0	0	0	0	1	0	0	0	0
Otu01610	1	1	1	0	0	0	0	0	0	2	0	0	1	0	0	0	0	1	0	0	0	1	0	0	0	0	0	0	0	0	0	0	0	0	0	0	0	0	0	0	0	0	0	1	0	1	0	0	0
Otu01611	0	0	0	0	1	1	0	0	0	0	0	0	1	0	0	0	0	0	0	0	0	1	0	0	0	0	0	0	0	0	0	2	1	0	0	0	0	0	0	0	0	0	0	0	0	1	0	1	0
Otu01612	1	0	0	0	0	0	0	0	0	0	0	1	0	0	0	0	0	0	1	0	0	0	1	0	0	0	0	0	0	0	0	0	0	0	0	0	1	0	0	0	0	0	0	0	0	0	0	0	0
Otu01613	0	0	0	0	0	0	0	0	0	1	0	0	0	0	0	0	0	0	0	0	0	0	0	0	0	0	0	0	0	0	1	0	0	0	0	0	1	1	0	0	0	0	0	0	0	0	0	0	0
Otu01614	0	0	0	0	0	0	0	0	0	1	0	0	1	0	0	0	0	0	3	0	0	0	0	0	0	0	0	1	1	0	0	0	0	0	0	0	0	0	0	0	0	0	0	0	0	0	0	0	1
Otu01615	0	0	0	0	1	0	0	0	0	0	0	0	0	0	0	0	0	0	0	0	0	0	0	0	1	0	1	0	0	0	1	1	0	0	0	0	1	0	0	0	0	0	0	0	0	0	0	0	0
Otu01616	0	0	0	0	1	0	0	0	0	0	0	0	0	0	0	0	0	0	0	0	0	0	0	0	0	0	0	0	1	0	0	0	0	1	0	0	0	0	0	0	0	0	0	0	0	0	0	0	0
Otu01617	0	0	0	0	0	0	0	0	0	0	0	0	0	0	0	0	0	0	0	0	0	0	0	0	0	0	0	0	0	0	0	0	0	0	0	0	0	0	1	0	0	0	0	0	0	0	0	0	0
Otu01618	0	0	0	0	0	1	0	0	1	0	0	0	0	0	0	0	0	0	0	0	0	0	0	0	0	0	0	0	0	0	0	0	0	0	0	0	2	0	0	0	0	0	0	0	1	0	1	0	0
Otu01619	0	0	1	0	1	0	0	0	0	0	1	0	1	1	0	0	0	0	0	1	0	0	0	0	0	0	0	0	0	0	0	0	0	0	0	0	0	0	0	1	2	0	0	0	0	0	0	0	0
Otu01620	1	0	0	0	0	0	0	0	0	0	0	1	0	0	0	0	1	2	0	0	0	0	0	1	0	0	1	0	0	0	0	0	0	0	0	0	0	0	0	0	0	0	0	0	0	0	0	0	0
Otu01621	0	0	0	0	0	0	0	0	0	0	0	0	0	0	0	0	0	0	0	0	0	0	0	0	3	0	0	0	0	0	0	0	0	0	0	0	0	0	0	0	0	0	0	0	0	0	0	0	0
Otu01622	0	0	0	0	0	0	0	1	0	0	0	0	0	0	0	0	0	0	0	0	0	0	0	0	0	0	0	0	0	0	0	1	0	0	0	1	0	1	0	0	0	0	0	0	0	0	0	0	0
Otu01623	0	0	1	0	0	1	0	0	0	0	1	0	0	0	0	1	0	0	0	0	0	0	0	0	0	0	0	0	0	0	0	0	0	0	1	0	0	0	0	0	0	0	0	1	0	1	0	0	0
Otu01624	0	0	0	1	1	0	0	0	1	1	0	1	1	0	0	0	0	1	0	0	0	1	0	0	0	0	0	0	0	0	0	0	0	0	0	0	0	0	0	0	0	0	0	0	0	0	0	0	0
Otu01625	1	0	0	0	0	0	0	1	1	0	0	0	0	0	0	0	0	0	0	0	0	0	1	0	0	0	1	0	0	0	0	0	0	0	0	0	0	0	0	0	1	0	0	0	0	0	0	0	0
Otu01626	0	0	0	0	1	0	0	0	0	1	0	0	0	0	0	0	0	0	0	1	0	0	0	0	0	0	0	0	0	0	0	0	0	0	0	0	0	0	0	0	0	0	0	0	0	0	0	1	0
Otu01627	0	0	0	0	0	0	0	0	0	0	0	0	0	0	0	0	0	1	0	0	0	0	0	0	0	0	0	0	1	0	0	0	0	0	0	0	0	0	0	0	0	0	0	0	0	0	0	0	1
Otu01628	0	0	0	0	2	0	2	0	0	0	0	0	0	0	0	0	0	0	0	0	1	0	0	0	0	0	0	0	0	0	0	0	0	1	2	0	0	0	0	1	0	0	0	0	0	0	0	0	0
Otu01629	0	0	1	0	1	0	0	0	1	0	0	0	0	1	0	0	0	0	0	0	0	0	0	0	0	0	0	0	0	0	0	0	0	0	0	0	0	0	0	0	0	0	0	0	0	0	0	0	0
Otu01630	0	0	0	0	0	0	0	0	0	0	0	0	0	0	0	0	0	0	0	0	0	0	0	1	0	0	0	0	0	0	0	0	0	0	0	1	0	0	0	0	0	0	0	0	0	0	0	1	1
Otu01631	0	0	0	0	1	0	0	0	0	0	0	1	0	0	0	0	0	0	0	0	0	0	0	0	1	0	0	0	0	2	0	1	1	0	0	0	0	0	1	1	0	0	0	0	0	0	0	0	0
Otu01632	0	0	1	0	0	0	0	0	0	0	0	0	0	1	0	0	0	0	0	0	0	0	1	0	0	0	0	0	0	0	0	0	1	0	1	0	0	0	0	0	0	0	0	0	0	0	0	1	1
Otu01633	0	0	0	0	0	0	0	0	0	0	0	1	0	0	0	0	0	0	0	0	0	0	0	0	0	0	0	1	1	0	0	0	0	0	0	0	0	0	0	0	0	0	1	0	0	0	0	0	1
Otu01634	0	0	0	0	0	0	0	0	0	0	0	0	0	0	0	0	0	0	0	0	1	1	1	0	0	0	0	0	0	0	0	0	0	0	0	0	0	0	0	0	0	0	0	0	0	0	0	0	1
Otu01635	1	0	0	0	0	1	0	0	0	0	1	1	0	0	0	0	0	0	0	0	2	0	0	0	0	1	0	0	0	0	0	0	0	1	0	0	1	0	0	0	0	1	0	0	0	1	0	1	0
Otu01636	1	0	0	0	1	1	0	0	0	1	0	1	0	0	0	0	0	0	0	0	0	0	0	0	0	0	0	0	0	0	0	0	1	0	0	1	0	0	0	0	0	0	0	0	0	0	0	0	0
Otu01637	0	0	0	0	0	0	0	0	0	1	0	0	0	0	0	0	0	0	0	0	0	0	0	0	0	0	0	0	0	0	0	0	0	0	0	0	0	0	0	0	0	0	0	0	0	0	1	0	0
Otu01638	0	0	0	1	0	0	0	0	0	0	0	0	0	0	0	0	0	1	0	0	0	1	0	0	0	0	0	0	0	0	0	0	0	0	0	1	0	0	0	0	0	0	0	0	0	0	0	0	0
Otu01639	0	0	0	0	0	0	0	0	0	0	0	0	0	0	0	0	0	0	0	1	0	0	0	0	0	1	0	0	0	0	0	0	0	0	0	0	1	0	1	1	0	0	0	0	0	0	0	0	0
Otu01640	1	0	0	0	1	0	0	0	0	0	1	1	0	0	0	0	0	1	0	0	0	0	0	0	0	0	0	0	0	1	0	0	0	0	0	0	0	0	0	0	0	0	0	0	0	0	0	0	0
Otu01641	0	0	1	0	0	0	0	0	0	0	0	0	0	0	0	0	0	0	0	0	0	0	0	0	0	1	0	0	0	0	0	1	0	0	1	0	0	0	0	0	0	0	0	0	0	0	0	0	0
Otu01642	0	1	0	0	0	0	0	0	0	0	0	0	0	0	0	0	0	0	0	0	0	0	0	0	0	0	0	0	0	0	0	1	0	0	0	0	1	0	0	0	0	0	0	0	0	0	0	0	0
Otu01643	0	0	0	0	0	0	0	0	0	0	0	0	0	0	0	0	0	0	0	1	0	1	0	0	0	2	0	0	0	0	0	0	0	0	0	0	0	0	0	0	0	0	0	0	1	0	2	0	0
Otu01644	0	0	0	0	1	0	0	1	0	0	2	0	0	0	0	0	0	0	1	0	0	0	0	0	0	0	0	0	0	0	1	0	0	0	0	0	0	0	0	0	0	0	0	0	1	0	0	0	0
Otu01645	0	0	0	0	0	1	0	0	0	0	0	0	0	0	0	0	0	0	0	0	0	0	0	0	0	0	1	0	0	0	0	0	0	0	0	0	0	0	0	0	0	0	0	0	0	0	0	0	0
Otu01646	0	0	0	0	0	0	0	0	0	0	0	0	0	0	0	0	0	0	0	0	0	1	0	0	0	0	0	0	0	0	0	0	0	1	0	1	2	0	0	0	0	0	0	0	0	0	0	0	0
Otu01647	0	0	0	0	0	0	0	1	0	0	1	0	0	0	0	0	0	1	0	0	0	0	0	0	0	0	0	0	0	1	1	0	0	1	3	0	0	0	0	0	0	0	1	0	0	0	0	0	0
Otu01648	0	0	0	0	0	0	0	0	0	0	0	0	0	0	0	0	0	0	0	0	0	0	0	0	0	0	0	0	0	0	0	0	0	0	0	0	1	0	0	0	0	1	0	0	0	1	0	0	1
Otu01649	1	0	0	1	0	0	0	0	0	1	0	0	0	0	0	0	0	0	0	0	0	0	0	0	0	0	0	0	0	1	0	0	0	1	0	0	0	0	0	0	0	0	0	0	0	0	0	0	0
Otu01650	0	0	0	0	1	0	0	0	0	1	0	0	0	0	0	0	0	0	0	0	0	0	2	0	0	0	0	0	0	0	1	0	0	1	0	0	0	0	0	0	0	0	0	0	0	0	0	0	1
Otu01651	0	0	1	0	0	0	0	0	0	0	0	0	0	0	0	0	0	0	0	0	0	0	0	0	0	0	1	0	1	1	0	0	0	0	1	1	0	0	0	0	0	0	0	0	0	0	0	0	0
Otu01652	2	0	0	0	1	0	0	0	0	0	0	0	0	0	1	0	0	0	0	0	0	1	0	0	0	0	0	1	0	0	0	1	0	0	1	0	0	0	0	0	0	0	0	0	0	0	0	0	0
Otu01653	0	0	0	0	0	0	0	0	0	0	0	0	0	0	0	0	0	0	0	0	0	0	0	0	0	0	0	2	0	0	0	0	0	0	0	0	0	1	0	0	0	0	0	1	0	1	0	0	0
Otu01654	0	0	0	0	0	0	0	0	0	0	0	0	0	0	0	0	1	0	0	0	1	0	0	0	0	0	0	0	0	0	1	0	0	0	0	0	0	0	0	1	0	0	0	0	0	0	0	0	0
Otu01655	0	0	0	0	1	0	0	0	0	0	0	0	2	0	0	0	0	0	0	0	0	0	0	0	1	0	0	0	0	1	0	0	0	0	0	0	0	0	0	0	0	0	1	0	0	0	0	0	0
Otu01656	1	0	1	1	1	0	1	0	0	0	0	2	1	1	0	0	0	0	0	0	0	0	0	0	0	0	0	0	0	0	0	0	1	0	0	0	0	0	0	0	0	0	0	0	0	0	0	0	0
Otu01657	0	0	0	0	0	0	0	0	0	0	0	0	0	0	0	0	0	0	0	0	0	0	0	0	0	0	0	0	0	0	0	0	0	0	0	0	0	0	1	1	1	0	0	1	1	1	2	0	0
Otu01658	0	0	0	0	0	0	0	0	0	0	0	0	0	0	0	0	0	0	0	0	0	0	0	0	1	0	0	0	0	0	0	0	1	0	0	0	1	0	0	0	0	0	0	0	0	1	0	0	0
Otu01659	0	0	0	1	1	0	1	0	0	0	0	0	1	0	0	0	1	0	1	0	0	0	0	0	0	0	0	0	0	0	0	0	0	0	0	0	0	0	0	0	0	0	0	0	0	0	0	0	0
Otu01660	0	0	0	0	0	0	0	0	0	0	0	0	0	1	0	1	0	0	0	0	0	0	0	0	0	0	0	0	0	0	0	0	0	0	0	0	0	0	0	0	0	0	0	1	0	0	0	0	0
Otu01661	0	0	0	1	0	0	0	0	0	0	1	0	0	0	0	0	0	0	0	0	0	0	1	0	0	0	0	1	0	0	0	0	0	0	0	0	0	0	0	0	0	0	1	0	0	1	0	0	0
Otu01662	1	1	0	0	0	0	0	0	0	0	0	0	0	0	0	1	2	0	0	1	0	0	0	0	0	0	0	0	0	0	0	0	0	0	0	0	0	0	0	0	0	0	0	0	0	0	0	0	0
Otu01663	0	0	0	0	0	0	0	0	0	0	0	0	0	0	0	0	0	0	0	0	0	0	0	0	0	0	0	0	0	0	0	0	0	0	0	0	0	0	0	0	0	0	0	0	0	0	0	0	0
Otu01664	0	0	0	0	0	0	0	0	0	0	0	0	0	0	0	1	0	0	0	0	0	0	0	0	0	0	2	0	0	0	0	1	0	0	0	0	0	0	0	0	0	0	0	0	0	0	0	1	0
Otu01665	0	0	1	1	0	1	0	0	0	0	0	0	0	0	0	0	0	0	0	0	0	0	0	0	0	0	0	1	0	0	0	0	1	1	0	0	0	0	0	0	0	0	0	0	0	0	0	0	0
Otu01666	0	0	0	1	0	0	0	0	0	0	1	0	0	0	0	0	0	0	0	0	0	0	0	0	0	0	0	0	1	0	0	0	1	0	1	0	0	0	0	0	0	0	0	0	0	0	0	0	0
Otu01667	0	0	0	0	0	0	0	0	0	0	0	0	0	0	0	0	0	0	0	0	0	0	0	0	0	0	0	0	0	0	0	0	0	0	0	0	0	0	0	0	0	0	0	0	0	0	0	0	0
Otu01668	0	0	0	0	0	0	0	0	0	0	0	0	0	0	0	0	0	0	0	0	0	0	0	0	0	0	0	0	0	0	0	0	0	0	0	0	0	0	0	2	0	0	2	3	0	0	1	0	0
Otu01669	0	0	0	1	0	0	0	0	0	0	0	0	0	0	0	0	0	0	1	0	0	0	0	0	0	0	0	0	0	0	0	0	0	2	0	1	0	2	0	0	0	0	0	1	0	0	0	0	0
Otu01670	0	0	0	0	0	0	0	0	0	0	0	0	0	0	0	0	0	0	0	0	0	0	0	0	0	0	0	1	0	0	0	0	1	0	0	0	0	1	1	0	1	0	0	1	0	0	0	0	0
Otu01671	0	0	0	0	0	0	0	0	0	0	0	0	0	0	0	0	0	0	0	0	0	0	0	0	1	1	0	0	1	0	0	0	0	0	1	0	0	0	0	0	0	0	0	0	0	0	0	0	0
Otu01672	0	0	0	0	0	0	0	1	0	0	0	0	0	1	1	1	0	0	0	0	0	1	0	0	0	0	0	0	0	0	0	0	0	0	0	0	0	0	0	0	0	0	1	0	0	0	0	0	0
Otu01673	2	1	0	1	1	1	0	0	0	1	0	0	0	0	0	0	0	0	0	0	0	0	0	0	0	0	0	0	0	0	0	0	0	0	0	0	0	0	0	0	0	0	0	0	0	0	0	0	0
Otu01674	0	0	0	0	2	0	0	0	0	0	1	0	0	1	1	0	0	0	0	0	0	0	0	0	0	0	1	0	0	1	0	0	0	0	0	1	0	0	0	0	0	0	0	0	1	0	0	0	0
Otu01675	0	0	0	0	0	0	0	0	0	0	0	0	0	0	0	0	0	0	0	0	1	2	0	1	1	1	0	0	0	0	0	0	0	0	0	0	0	0	0	0	0	0	0	0	1	0	1	0	2
Otu01676	0	0	0	0	0	0	0	0	0	0	0	0	0	0	1	0	0	0	0	0	0	0	0	1	0	0	0	0	0	0	0	0	0	0	0	0	0	0	0	0	0	0	0	0	0	1	0	1	1
Otu01677	1	1	1	0	0	0	0	0	0	0	0	0	0	0	0	0	1	0	0	1	0	0	0	0	0	0	0	0	0	0	0	0	0	0	0	0	0	1	1	0	0	0	0	0	0	0	0	0	0
Otu01678	0	0	0	0	0	0	0	0	0	1	0	0	0	0	1	0	0	0	0	0	0	1	0	0	0	0	0	0	0	0	0	0	0	0	1	0	0	0	1	0	0	0	0	0	0	0	0	0	0
Otu01679	0	1	0	0	0	1	0	0	0	1	0	0	0	0	0	0	0	0	0	0	0	0	0	0	0	2	0	0	0	0	0	0	0	0	0	0	0	0	0	0	0	0	1	0	0	0	0	1	0
Otu01680	0	0	0	0	0	0	0	0	0	0	0	0	0	0	0	0	0	0	0	0	0	0	0	0	0	0	0	0	0	0	0	0	0	0	0	0	0	0	0	0	0	0	0	0	0	0	0	0	0
Otu01681	0	0	0	0	0	0	0	0	0	0	0	0	0	0	0	0	0	0	0	0	0	1	0	0	0	0	0	0	0	0	0	0	0	0	0	0	0	0	0	0	0	0	0	0	0	0	2	0	0
Otu01682	0	0	0	1	0	0	1	0	0	0	0	0	0	0	0	0	0	1	0	0	0	0	0	0	0	0	0	1	0	0	0	0	2	1	0	1	0	1	0	1	0	0	0	0	0	0	0	0	0
Otu01683	0	1	0	0	0	0	0	0	0	0	0	0	0	0	0	0	0	0	0	0	0	0	0	0	1	0	0	0	0	0	0	0	0	0	1	0	0	0	0	0	0	0	0	0	0	0	0	0	0
Otu01684	0	0	0	0	0	0	0	1	0	1	0	0	0	0	0	0	0	0	0	0	1	0	0	0	0	0	0	0	0	0	0	0	0	0	0	0	0	0	0	0	0	0	0	0	0	0	0	0	0
Otu01685	0	0	1	0	0	0	0	0	1	0	0	0	1	0	0	0	0	0	0	0	0	0	0	0	0	0	0	0	1	0	1	0	1	0	1	1	0	0	0	0	0	0	0	0	0	0	0	0	0
Otu01686	2	0	0	0	0	0	0	1	0	1	0	0	0	1	0	0	0	0	0	0	1	0	0	0	0	0	0	0	0	0	0	0	0	0	1	0	0	0	0	2	0	0	0	0	0	0	0	0	0
Otu01687	0	1	0	0	0	0	0	0	0	0	0	0	0	0	0	2	0	0	0	0	1	0	0	1	0	0	0	0	0	0	0	0	0	0	0	0	1	0	0	0	0	0	0	0	0	0	0	0	0
Otu01688	0	1	0	0	0	0	0	0	0	0	0	0	1	0	0	0	0	0	0	1	0	0	0	0	0	0	0	0	1	0	0	0	0	0	0	0	0	0	0	0	0	0	0	0	1	1	0	0	0
Otu01689	0	0	0	0	0	0	0	0	0	0	0	0	0	0	0	0	0	0	0	0	0	0	0	0	0	0	0	0	0	0	0	0	0	0	0	0	0	0	2	3	1	0	0	1	0	0	0	0	0
Otu01690	0	2	0	0	1	0	0	0	0	0	1	0	1	0	0	0	0	0	0	0	0	0	0	0	0	0	0	0	0	0	1	0	0	0	0	0	0	0	0	0	0	0	0	0	0	0	0	0	0
Otu01691	0	0	0	0	0	0	0	0	0	0	0	0	0	0	0	0	0	0	0	1	0	0	1	0	0	0	0	2	0	0	0	0	0	1	1	0	0	1	0	0	0	0	0	0	0	0	0	0	0
Otu01692	0	0	0	0	0	0	0	0	0	0	0	0	0	0	0	0	0	0	0	0	0	0	0	0	0	0	1	0	1	0	0	0	0	0	0	0	0	0	0	0	0	0	0	0	0	0	0	0	0
Otu01693	0	0	0	0	0	1	0	0	1	0	0	0	0	0	0	0	0	0	1	0	0	1	0	0	0	0	0	0	0	0	0	0	0	0	0	0	0	0	0	1	1	0	0	0	0	0	0	0	0
Otu01694	0	0	0	0	0	0	0	0	0	0	0	0	0	0	0	0	0	0	0	0	0	0	0	0	0	0	0	0	0	0	0	0	0	0	0	0	0	0	2	0	2	0	0	2	0	0	1	0	0
Otu01695	0	1	0	1	0	0	0	0	1	0	1	0	0	0	0	0	0	0	1	2	0	0	0	1	0	0	0	0	0	0	0	0	0	0	0	0	0	0	0	0	0	0	0	0	0	0	0	0	0
Otu01696	0	0	0	0	0	0	0	0	0	0	0	0	0	0	0	0	0	0	0	0	0	3	0	0	0	0	0	0	0	0	0	0	0	0	0	0	0	0	0	0	0	0	0	0	0	0	0	0	0
Otu01697	2	1	1	0	0	0	0	0	1	1	0	0	0	0	0	0	0	0	0	0	1	0	0	0	0	0	0	0	0	0	0	0	0	0	0	0	0	0	0	0	0	0	0	0	0	0	0	0	0
Otu01698	0	0	0	0	0	0	0	0	0	0	1	0	0	0	0	0	0	0	0	0	0	0	0	1	0	0	0	1	0	0	0	0	0	1	0	0	0	1	0	0	0	1	0	1	0	0	0	0	0
Otu01699	0	0	0	0	0	0	0	0	0	0	0	0	0	0	0	0	0	0	0	1	0	0	0	0	0	0	0	0	0	0	0	0	0	0	1	0	0	0	0	0	0	0	0	0	0	0	0	1	0
Otu01700	0	0	0	0	0	0	0	0	0	0	0	0	0	0	0	0	1	0	0	0	0	0	0	0	0	0	0	1	0	1	0	1	0	0	0	0	0	0	0	0	0	0	0	0	0	1	0	0	1
Otu01701	0	0	0	0	0	0	0	0	0	0	0	0	0	0	0	0	0	0	0	0	0	0	0	0	0	0	0	0	0	0	0	0	0	0	0	0	0	0	1	0	0	0	1	0	1	0	0	0	0
Otu01702	1	0	0	0	0	0	0	1	0	0	0	0	0	0	0	0	0	0	0	0	0	0	0	0	0	1	0	0	0	0	0	0	0	0	0	0	0	0	0	0	0	0	0	0	0	0	0	0	0
Otu01703	0	0	0	0	0	0	0	0	0	0	0	0	0	0	0	0	0	0	0	0	0	0	0	0	0	0	0	0	0	0	0	0	0	0	0	0	0	0	0	0	0	0	0	0	1	0	0	1	1
Otu01704	0	0	0	0	0	0	0	0	0	0	0	0	0	0	0	0	0	0	0	0	0	0	0	0	0	0	0	0	0	0	0	0	0	1	0	0	0	0	0	0	0	0	0	0	0	0	0	1	0
Otu01705	0	0	0	0	0	0	0	0	1	0	0	0	0	1	0	0	0	0	0	0	0	0	0	0	0	0	0	0	0	0	0	0	0	0	0	0	0	1	0	0	0	0	0	0	0	0	0	0	0
Otu01706	0	0	1	0	0	1	0	0	0	0	0	0	0	0	0	0	0	0	0	0	0	0	0	0	0	0	0	0	0	0	0	1	0	0	0	0	0	0	0	0	0	0	0	0	0	0	0	0	0
Otu01707	0	0	0	0	1	0	0	0	0	0	0	0	0	0	0	0	0	0	0	0	0	0	0	0	0	0	1	0	1	0	0	1	0	0	0	1	1	0	0	0	0	0	0	0	0	0	0	0	0
Otu01708	0	0	0	0	0	0	0	0	0	0	0	0	0	0	0	0	0	0	0	0	0	0	0	0	0	0	0	0	0	0	1	0	0	0	0	0	0	0	0	0	0	0	0	0	0	0	0	0	0
Otu01709	0	0	0	1	0	0	0	0	0	0	0	0	0	0	0	0	0	0	0	1	0	0	0	0	0	0	3	1	0	0	0	0	0	0	0	0	0	0	0	0	0	0	0	0	0	0	0	0	0
Otu01710	0	1	0	0	0	0	0	0	0	0	0	2	0	0	0	1	0	0	0	0	0	0	0	0	0	0	0	0	1	0	0	0	1	0	0	0	0	0	0	0	1	0	0	0	0	0	0	0	0
Otu01711	0	0	0	0	0	0	0	0	0	0	0	0	0	0	0	0	0	0	0	0	0	0	0	0	1	0	0	0	0	1	0	1	0	0	0	0	0	1	0	0	0	0	0	0	0	1	1	0	1
Otu01712	0	0	0	0	0	0	0	0	0	0	0	0	0	0	0	0	0	0	0	0	0	0	0	0	0	0	0	0	0	0	0	0	0	0	0	0	0	0	0	1	0	2	0	0	0	2	0	0	2
Otu01713	0	0	0	0	0	0	0	0	1	0	0	1	0	0	0	0	0	2	1	1	0	0	0	0	0	0	0	0	1	0	0	0	0	0	0	0	0	0	0	0	0	0	0	0	0	0	0	0	0
Otu01714	0	0	0	0	0	0	0	0	0	0	0	0	0	0	0	0	0	0	0	0	1	0	0	0	0	0	0	0	0	0	0	1	1	1	0	0	0	0	0	0	0	0	0	0	0	0	0	0	0
Otu01715	0	0	0	0	0	0	0	0	0	0	0	0	0	0	0	0	0	0	0	0	0	0	0	0	0	0	0	0	0	0	0	0	0	0	0	0	0	0	0	0	0	0	0	0	0	0	0	0	0
Otu01716	0	0	0	0	0	0	0	2	1	1	0	0	0	0	0	0	0	0	2	0	0	0	0	0	0	0	1	0	1	0	0	0	0	0	0	0	0	0	0	1	0	0	0	0	0	0	0	0	0
Otu01717	0	0	0	0	0	0	0	0	0	0	0	0	0	0	1	2	1	0	0	0	0	0	0	1	1	0	0	0	0	0	0	0	0	0	0	0	0	0	0	0	0	0	0	0	0	1	1	0	0
Otu01718	1	0	0	0	0	0	0	0	0	0	0	0	0	0	0	0	0	0	0	0	0	0	0	0	0	1	0	0	0	0	0	0	0	0	0	0	0	1	0	0	0	0	0	0	0	0	0	0	0
Otu01719	1	0	0	0	1	0	0	0	0	0	0	1	0	0	0	0	0	0	0	0	0	0	0	0	0	0	0	0	0	0	0	0	0	0	0	0	0	0	1	0	0	0	0	0	0	0	0	0	0
Otu01720	0	0	0	1	0	0	0	0	0	0	0	0	0	0	0	0	0	0	0	0	0	0	0	0	1	0	0	0	0	0	0	0	0	0	0	0	0	0	0	0	0	0	0	0	0	0	0	0	0
Otu01721	0	0	0	0	0	0	0	1	1	0	1	0	0	0	0	0	0	0	0	0	0	0	0	0	0	0	0	0	0	0	0	0	0	0	0	0	0	0	0	0	0	0	0	0	0	1	0	0	0
Otu01722	0	0	0	0	0	0	0	0	0	0	0	0	0	0	0	0	0	0	0	0	0	0	0	0	0	0	0	0	0	0	0	0	0	0	1	0	0	0	0	0	0	0	0	0	0	0	0	0	0
Otu01723	1	0	0	0	0	0	0	0	0	0	0	0	0	0	0	2	0	0	1	0	0	0	0	0	0	0	0	0	0	0	0	0	0	0	0	0	0	0	0	0	0	0	0	0	0	0	0	0	0
Otu01724	0	0	0	0	0	1	0	0	0	0	0	0	0	0	2	0	1	0	1	0	0	0	0	0	0	0	0	0	0	0	0	0	0	0	0	0	0	0	0	0	0	0	0	0	0	0	0	0	0
Otu01725	0	1	0	0	0	0	0	0	0	0	0	0	0	0	0	0	1	0	2	0	1	0	0	1	0	0	0	1	1	0	0	0	0	0	0	0	0	0	0	0	0	0	0	1	0	0	0	0	0
Otu01726	0	0	0	0	0	0	1	1	0	0	0	0	0	0	0	0	0	0	0	0	0	0	0	0	0	0	0	0	0	0	0	0	0	1	0	0	0	0	0	0	0	0	1	0	0	0	0	0	0
Otu01727	1	0	0	1	0	0	0	1	0	0	0	0	0	0	1	0	0	0	0	0	0	0	0	0	0	0	0	0	0	0	0	0	0	0	1	0	0	0	0	1	0	0	1	1	0	0	0	0	0
Otu01728	0	0	0	0	0	0	0	1	0	0	0	0	0	0	0	0	0	0	0	0	0	0	0	0	0	0	0	0	0	1	0	0	0	0	0	0	0	0	0	0	1	0	0	0	0	0	0	0	0
Otu01729	0	0	0	0	0	0	0	0	0	0	0	0	0	0	0	0	0	0	0	0	0	0	0	0	0	0	0	1	0	0	0	0	0	0	0	0	0	0	0	1	0	0	0	2	0	0	0	0	0
Otu01730	0	0	0	0	0	0	0	0	0	0	0	0	0	0	0	0	0	0	0	0	0	0	0	0	1	0	1	1	0	0	0	0	0	0	0	0	0	0	0	0	0	0	0	0	0	0	1	0	0
Otu01731	0	3	0	1	0	0	0	0	0	0	0	0	0	0	0	0	0	0	0	0	0	0	0	0	0	0	0	1	1	0	0	0	0	0	0	0	0	0	0	0	0	0	0	0	0	0	0	0	0
Otu01732	0	0	0	1	0	0	0	0	0	0	0	0	0	0	0	0	0	0	0	0	0	0	0	0	0	1	0	0	0	0	0	0	0	0	0	0	0	0	0	0	0	1	1	1	0	1	0	0	0
Otu01733	0	2	0	0	0	0	0	1	0	0	0	0	0	0	0	0	0	0	1	0	0	0	0	0	0	0	0	0	0	0	0	0	0	0	0	0	0	0	0	0	0	0	0	0	0	0	0	0	0
Otu01734	1	0	0	0	0	0	1	0	0	0	0	0	0	1	0	1	0	0	0	0	0	0	0	0	0	0	0	0	0	0	0	0	0	0	0	0	0	0	0	0	1	0	0	0	0	0	0	0	0
Otu01735	0	0	1	1	0	0	0	0	0	0	0	0	0	0	0	0	0	1	0	0	0	0	1	0	0	0	0	0	0	1	1	0	1	0	1	1	0	0	0	0	0	0	0	0	0	0	0	0	0
Otu01736	0	0	0	0	0	0	0	0	1	0	0	0	0	0	2	0	0	0	0	0	0	0	0	0	0	0	0	0	0	0	0	0	0	0	0	0	0	0	0	0	0	0	0	0	0	0	0	0	0
Otu01737	0	0	0	0	0	0	0	0	0	0	0	0	0	0	0	0	1	0	0	0	0	0	0	0	0	0	0	0	0	0	0	0	0	0	0	0	0	0	0	0	0	0	0	0	0	0	0	1	0
Otu01738	0	0	0	0	0	0	0	0	0	0	0	0	0	0	1	0	0	0	0	0	0	0	0	0	0	0	0	0	0	1	0	2	0	0	0	0	0	0	0	1	0	0	0	0	0	0	0	0	0
Otu01739	0	0	0	0	0	0	0	0	2	0	0	0	1	1	0	0	0	0	1	0	0	0	0	0	0	0	0	0	0	0	0	0	0	0	1	0	1	0	0	0	0	1	0	0	2	0	0	0	0
Otu01740	0	0	0	0	0	0	0	0	0	0	0	0	0	0	0	0	0	0	0	0	0	0	0	0	0	0	0	1	0	0	0	0	0	0	0	0	0	0	0	0	1	1	0	1	0	0	0	0	0
Otu01741	0	0	0	0	0	1	1	0	0	0	0	0	2	0	0	0	0	0	0	0	0	0	0	0	0	0	0	0	0	0	1	0	0	1	0	0	0	0	1	0	0	0	0	0	0	0	0	0	0
Otu01742	0	0	0	0	0	0	0	0	0	0	0	0	0	0	0	0	0	0	0	1	0	0	0	0	0	1	0	0	0	1	0	0	0	0	0	0	0	0	1	0	0	0	0	0	0	0	0	0	1
Otu01743	0	0	1	1	0	0	0	0	2	0	0	0	0	0	0	0	0	0	0	0	1	0	0	0	0	0	0	0	0	1	1	0	0	0	0	0	1	0	0	0	0	0	0	0	0	0	0	0	0
Otu01744	0	0	1	0	0	0	0	0	2	1	0	0	0	0	0	0	0	0	0	0	0	0	0	0	0	0	0	0	0	0	0	0	0	0	0	0	0	0	0	0	0	0	0	0	0	0	1	0	0
Otu01745	0	0	0	0	0	0	0	0	0	0	0	0	0	0	0	0	0	0	0	0	0	0	0	0	0	0	0	0	0	0	0	0	0	0	0	0	0	0	0	0	0	0	0	0	0	0	0	0	0
Otu01746	0	0	0	0	0	0	0	0	0	0	0	0	0	0	0	0	0	0	0	0	0	0	0	0	0	0	0	0	1	0	0	0	0	0	1	0	0	0	0	0	0	0	1	0	2	0	0	0	1
Otu01747	0	0	0	0	0	0	0	0	1	0	0	0	0	0	0	0	0	0	0	0	0	0	0	0	0	0	0	1	0	2	0	2	1	0	0	1	0	1	0	1	0	0	0	0	0	0	0	0	0
Otu01748	0	0	0	0	0	0	0	0	1	1	1	0	0	2	1	0	0	0	1	0	0	0	0	0	0	0	0	0	0	0	0	0	0	0	0	0	0	0	0	0	0	0	0	0	0	0	0	0	0
Otu01749	0	0	1	1	0	0	0	0	0	0	1	0	0	0	0	0	1	0	0	0	0	0	0	0	0	0	0	1	0	0	0	0	1	0	1	0	0	0	0	0	0	0	0	0	0	0	1	0	1
Otu01750	0	0	0	0	0	0	0	0	0	0	0	0	0	0	0	1	0	1	0	1	1	0	0	0	0	0	0	0	0	0	0	0	0	0	0	1	0	0	0	0	1	0	1	0	0	0	0	0	1
Otu01751	0	0	0	0	0	0	0	0	0	0	0	0	0	0	0	0	0	0	0	0	0	1	0	0	0	0	0	0	0	0	0	0	1	0	0	0	0	0	0	0	0	0	0	0	1	0	0	0	0
Otu01752	1	0	0	0	0	0	0	1	0	0	0	0	0	0	0	1	0	0	0	1	0	0	0	0	0	0	0	0	1	0	0	0	0	0	0	0	0	0	0	0	0	0	0	0	0	0	0	0	0
Otu01753	0	1	0	0	1	0	0	1	0	0	1	0	1	0	0	0	1	0	0	1	0	0	0	1	0	0	0	0	0	0	0	0	0	0	0	0	0	0	0	0	0	0	0	0	0	0	0	0	0
Otu01754	1	0	1	1	2	0	0	0	0	0	0	0	0	0	0	0	0	0	0	1	0	0	0	0	0	0	1	0	1	0	0	0	0	0	0	0	0	0	0	0	0	0	0	0	0	0	0	0	0
Otu01755	0	0	0	0	0	1	0	0	0	0	0	0	0	0	0	0	1	0	0	0	0	0	1	0	0	0	0	0	0	1	0	0	2	0	0	0	0	1	1	0	0	0	0	0	0	0	0	0	0
Otu01756	0	0	0	1	0	0	0	0	0	0	0	0	0	0	2	0	0	0	0	1	0	0	0	0	0	0	0	0	0	0	0	0	0	0	0	0	0	0	0	1	0	0	0	0	0	0	0	1	0
Otu01757	0	0	0	0	0	2	0	0	0	0	1	0	1	0	0	0	0	0	0	0	0	0	0	0	0	0	0	0	0	0	0	0	1	0	0	0	0	1	0	0	0	0	0	0	0	0	1	0	0
Otu01758	0	0	0	0	0	0	0	0	0	0	1	0	0	0	0	0	0	0	0	0	0	0	0	0	0	0	0	0	0	1	1	0	1	0	1	0	0	0	1	0	1	0	0	0	0	0	0	0	0
Otu01759	0	0	0	1	0	0	0	0	0	0	0	1	0	0	0	0	1	0	0	0	0	0	0	0	0	0	0	0	0	0	0	0	0	0	0	0	0	2	0	0	0	0	1	0	1	0	0	0	0
Otu01760	0	1	0	1	0	0	0	0	0	0	1	0	1	1	0	0	1	0	0	0	0	0	0	0	0	0	0	0	0	1	0	0	0	0	0	0	1	0	0	0	0	0	0	0	0	0	0	0	0
Otu01761	1	0	0	0	0	0	0	0	1	0	0	0	0	0	0	0	0	0	0	0	0	0	1	0	1	0	0	0	0	0	0	0	0	0	0	0	0	0	0	0	0	1	0	0	1	0	0	0	0
Otu01762	0	0	0	0	0	0	0	0	0	1	1	0	1	0	0	0	0	0	0	1	0	0	0	0	0	0	0	0	0	0	0	1	0	0	0	1	0	0	0	0	1	1	0	0	0	0	0	0	0
Otu01763	0	0	0	0	0	0	0	0	0	0	1	0	0	0	0	0	0	0	0	0	0	0	1	0	1	0	0	0	0	0	0	1	0	0	1	0	0	0	0	0	0	0	0	0	0	0	2	1	0
Otu01764	0	1	1	1	0	0	0	0	0	1	0	0	0	0	1	0	0	1	0	0	0	0	0	0	0	0	0	0	0	0	0	0	0	0	0	0	0	0	0	0	0	0	0	0	0	0	0	0	0
Otu01765	0	0	0	0	0	0	0	0	0	0	0	0	0	0	0	0	0	0	0	0	0	1	0	0	0	0	0	0	0	0	0	0	0	0	0	0	0	1	0	0	0	0	0	0	0	1	1	0	0
Otu01766	0	0	0	0	0	0	0	0	0	0	0	0	0	0	0	0	1	0	0	0	0	1	0	0	0	0	1	0	1	0	0	0	0	1	0	0	0	0	0	0	0	0	0	1	0	0	0	0	0
Otu01767	0	0	0	0	0	0	0	0	0	0	0	0	0	0	0	0	1	1	0	0	0	1	2	0	0	0	0	0	0	0	0	0	1	0	0	0	1	0	0	0	0	0	0	0	1	0	0	0	0
Otu01768	0	0	0	0	0	0	0	0	1	0	0	0	0	0	0	0	0	0	0	0	0	0	0	1	0	1	0	0	0	0	0	0	0	0	0	0	0	0	0	0	0	0	1	0	0	1	0	0	0
Otu01769	0	0	0	2	0	0	0	0	0	0	0	1	0	0	1	0	1	0	0	0	0	0	1	0	0	0	0	0	1	0	0	0	0	0	0	0	0	0	0	0	0	0	0	0	0	0	0	0	0
Otu01770	0	0	0	0	0	0	0	0	0	0	0	0	0	0	0	0	0	0	0	0	1	3	0	1	0	2	0	0	0	0	0	0	0	0	0	0	0	0	0	0	0	0	0	0	0	0	0	0	0
Otu01771	0	0	0	0	0	0	0	0	0	0	0	0	0	0	0	0	0	0	0	0	0	0	0	0	0	0	0	0	0	0	0	0	0	0	0	0	0	0	1	3	0	0	0	0	0	0	1	1	1
Otu01772	0	0	0	0	0	0	0	0	0	0	0	0	1	0	0	0	0	0	0	0	0	0	0	0	0	0	0	0	0	0	0	0	0	1	0	0	0	0	0	1	0	1	0	0	0	1	0	0	0
Otu01773	0	2	0	0	1	0	0	1	1	1	0	0	0	0	0	1	0	0	0	0	0	0	0	0	0	0	0	0	1	0	0	0	0	0	0	0	0	0	0	0	0	0	0	0	0	0	0	0	0
Otu01774	0	0	0	0	0	0	0	0	0	0	0	0	0	0	0	0	0	0	0	1	1	0	0	0	0	0	1	0	0	0	0	0	0	0	0	0	0	0	0	0	0	0	0	0	0	0	0	0	0
Otu01775	0	0	0	0	0	1	0	0	0	1	0	0	0	0	0	0	0	0	0	0	0	0	0	0	0	0	0	0	0	0	0	0	0	0	0	0	0	0	0	0	0	0	0	1	0	0	0	0	0
Otu01776	0	0	0	0	0	0	0	0	0	0	0	0	0	0	0	0	0	0	0	0	0	0	0	0	0	1	0	1	0	1	0	0	0	0	0	0	0	0	1	1	0	0	0	0	1	0	0	0	0
Otu01777	0	1	0	0	0	1	0	0	0	0	0	0	0	0	0	0	0	0	1	0	0	0	0	0	0	0	1	0	0	0	0	1	1	1	1	0	0	0	0	0	0	0	0	0	0	0	0	0	0
Otu01778	1	0	0	0	0	0	0	1	0	0	0	1	0	0	0	0	1	0	0	0	0	0	1	0	0	0	0	0	0	0	0	0	1	0	0	0	0	0	0	0	0	0	0	0	0	0	0	0	0
Otu01779	0	0	0	0	0	0	0	0	0	0	0	0	0	0	1	0	0	0	0	0	0	0	0	0	0	0	0	0	0	1	1	0	0	0	0	0	0	0	1	0	1	0	0	0	0	0	0	0	0
Otu01780	0	0	0	0	0	1	0	0	0	0	0	0	0	0	0	0	0	0	1	0	1	0	0	0	0	0	0	0	1	0	0	0	0	0	0	0	1	0	0	0	0	0	0	0	0	0	0	0	0
Otu01781	0	0	0	0	0	0	0	0	0	0	0	0	0	0	0	1	0	0	0	0	1	0	0	0	0	0	0	0	0	0	0	0	0	0	0	0	0	0	0	0	0	0	1	0	1	0	0	0	0
Otu01782	0	0	0	0	0	0	0	0	0	1	0	1	0	0	0	0	0	0	0	0	0	0	0	0	0	0	0	0	0	0	1	0	0	0	0	0	0	0	0	0	0	0	0	0	0	0	0	0	0
Otu01783	0	0	0	0	0	0	0	0	0	0	0	0	0	0	0	0	0	0	0	0	0	1	0	0	0	0	0	0	0	0	0	2	0	0	0	1	0	0	0	0	0	0	0	0	0	0	0	0	0
Otu01784	0	1	0	0	0	1	1	1	1	0	0	0	0	0	0	0	1	0	0	0	0	0	0	0	0	0	0	0	0	0	0	0	0	0	0	0	0	0	0	0	0	0	0	0	0	0	0	0	0
Otu01785	0	0	0	1	1	0	0	0	1	0	0	0	0	0	0	0	0	0	1	1	1	0	0	0	0	0	0	0	0	0	0	0	0	0	0	0	0	0	1	0	0	0	0	0	0	0	0	0	0
Otu01786	0	0	1	1	0	0	0	0	0	0	0	0	0	0	0	0	0	0	0	0	0	0	0	0	0	0	0	0	2	0	1	0	0	0	0	0	0	0	0	0	0	0	0	0	0	0	0	0	0
Otu01787	0	0	1	0	0	0	0	0	0	0	0	0	0	0	0	0	0	0	0	0	0	0	0	0	0	0	0	0	0	0	0	0	0	0	0	0	0	0	0	0	0	1	0	0	1	0	0	0	0
Otu01788	0	1	0	1	2	0	0	1	0	0	0	1	1	0	0	0	0	0	0	0	0	0	0	0	0	0	0	0	0	0	0	0	0	0	0	0	0	0	0	0	0	0	0	1	0	0	0	0	0
Otu01789	0	0	0	0	0	0	0	0	0	0	0	0	0	0	0	1	0	0	0	0	0	0	0	1	0	0	0	0	0	0	0	0	0	0	0	0	0	0	0	0	0	0	1	0	0	0	0	0	0
Otu01790	0	0	1	0	0	1	0	0	0	0	0	0	1	0	1	1	0	0	0	0	0	0	0	0	0	0	0	0	0	0	1	0	0	0	0	0	0	0	0	0	0	0	0	0	0	0	0	0	0
Otu01791	0	0	0	0	1	0	0	0	0	0	0	0	0	0	0	0	0	0	0	0	1	0	0	0	0	0	0	0	0	0	0	0	0	0	0	0	0	0	0	0	1	0	0	0	0	0	1	0	0
Otu01792	1	0	0	0	0	0	0	0	0	0	0	0	1	0	0	0	0	0	0	0	0	0	0	0	0	0	0	0	0	1	0	0	1	1	0	0	1	1	0	1	0	1	0	0	0	0	0	0	0
Otu01793	0	0	0	0	0	0	0	0	0	0	0	0	0	0	1	0	0	0	0	0	0	0	0	0	0	0	0	0	0	0	0	0	0	0	0	0	0	0	0	0	0	0	0	0	0	0	1	0	0
Otu01794	0	0	1	0	0	0	0	0	0	0	0	0	0	0	0	0	0	0	0	0	0	0	0	0	2	0	0	0	0	0	0	0	0	0	0	0	1	0	0	0	0	0	0	1	0	0	0	0	0
Otu01795	0	0	0	0	0	0	0	2	1	0	0	0	0	0	0	0	0	0	0	0	0	0	0	2	0	0	0	0	0	0	0	0	1	0	0	1	0	0	0	0	0	0	0	0	0	1	0	0	0
Otu01796	0	0	0	0	0	0	0	0	0	0	0	0	0	0	0	0	0	0	1	0	0	0	0	0	0	0	0	0	0	0	0	0	0	0	0	0	0	0	0	0	0	0	0	0	0	0	0	0	0
Otu01797	0	0	0	0	0	0	1	0	0	1	0	0	1	0	0	0	0	0	0	0	1	0	1	0	0	0	0	0	0	0	0	1	0	0	0	0	0	0	1	1	0	0	2	0	0	0	0	0	0
Otu01798	0	0	0	0	1	0	0	0	0	0	0	0	1	0	0	0	0	0	0	0	0	0	0	0	0	0	0	0	0	0	2	0	0	0	0	0	0	0	0	0	0	0	0	0	0	0	0	0	0
Otu01799	0	0	0	0	0	0	0	0	0	0	0	0	0	0	0	0	0	0	1	0	0	1	1	0	0	0	0	0	0	0	0	0	0	1	0	0	0	0	0	0	0	0	0	0	0	0	0	1	0
Otu01800	0	0	1	0	0	0	0	0	0	0	1	0	0	0	0	0	1	0	0	0	0	0	0	0	0	0	0	0	0	0	0	0	0	1	0	0	0	0	0	0	0	0	0	0	0	0	0	0	0
Otu01801	0	0	0	0	0	0	0	0	0	0	0	0	0	0	0	0	0	0	0	0	0	0	0	0	0	0	0	0	0	0	0	0	0	0	1	0	0	0	1	0	0	0	0	0	0	0	0	0	0
Otu01802	0	0	0	0	0	1	0	0	1	0	0	0	0	0	0	0	0	1	0	0	1	0	0	0	0	0	0	0	0	0	0	1	0	0	0	0	0	0	0	0	0	0	0	0	0	0	1	0	0
Otu01803	0	1	0	0	0	0	0	0	0	1	0	1	0	0	0	0	0	0	1	0	0	0	0	0	1	0	0	1	0	0	0	0	0	0	0	0	0	0	0	0	0	0	1	0	0	0	0	0	0
Otu01804	0	0	0	0	0	0	1	0	0	0	0	0	0	0	0	0	0	0	0	0	0	0	1	0	0	0	0	0	0	0	0	0	0	0	0	0	0	0	0	0	0	0	0	0	0	0	0	1	0
Otu01805	0	0	0	0	0	0	1	2	0	0	0	0	0	0	0	0	0	0	0	0	0	0	0	0	0	0	0	0	0	0	0	0	0	0	0	0	0	0	1	0	0	0	1	0	0	0	0	0	0
Otu01806	0	0	0	0	0	0	0	0	0	0	0	0	0	0	0	0	0	0	0	0	1	0	0	0	0	0	0	0	0	1	0	1	0	1	0	0	0	0	0	0	0	0	1	0	0	0	1	0	0
Otu01807	1	0	0	0	0	1	0	0	0	0	0	0	0	0	1	0	0	0	0	1	0	0	0	0	0	0	0	0	0	0	0	0	0	0	0	0	0	0	0	0	0	0	0	0	0	0	0	1	0
Otu01808	0	0	0	0	0	0	0	0	0	0	0	0	0	0	0	0	0	0	0	0	0	0	0	0	0	0	0	0	0	1	1	0	1	0	0	1	0	0	0	0	0	0	0	0	0	0	0	0	1
Otu01809	0	0	0	0	0	0	0	0	0	0	0	0	0	0	0	0	0	0	0	0	0	0	1	0	0	0	0	0	0	0	0	0	0	0	0	0	0	0	0	0	0	0	0	0	0	0	0	0	1
Otu01810	0	0	0	1	0	0	0	0	0	0	0	0	0	0	0	0	0	1	1	0	0	0	0	0	0	0	0	0	1	0	0	0	0	0	0	1	0	0	0	0	0	0	0	0	1	1	0	0	0
Otu01811	0	0	0	0	0	0	0	0	0	0	0	0	0	1	0	0	0	0	0	0	0	0	0	0	0	0	0	0	2	0	0	0	0	0	1	0	1	0	0	0	0	0	0	0	0	0	0	0	0
Otu01812	0	0	0	0	1	0	0	0	0	0	0	0	0	0	0	0	0	0	0	0	0	0	0	0	0	0	0	0	0	0	1	0	0	0	0	0	1	0	0	0	0	0	0	1	0	1	0	0	0
Otu01813	0	0	0	0	0	1	0	0	0	0	0	0	0	0	0	0	0	0	0	0	0	0	0	0	0	0	0	0	0	0	0	0	0	0	0	1	0	0	1	0	0	0	0	0	0	0	0	0	0
Otu01814	0	0	0	1	0	0	0	1	0	0	0	0	1	1	0	0	0	0	0	0	0	0	0	0	0	0	1	1	0	0	1	0	0	0	0	0	0	0	0	0	0	0	0	0	0	0	0	0	0
Otu01815	1	0	0	0	0	0	1	0	0	0	0	1	0	0	0	0	1	0	0	1	0	0	0	0	0	0	0	0	0	0	0	0	0	0	0	0	0	0	0	0	0	0	0	0	0	0	1	0	0
Otu01816	0	0	0	0	0	0	0	0	0	0	0	0	0	0	0	0	0	1	1	0	0	0	0	0	0	0	0	0	0	0	0	0	0	0	0	0	0	0	0	0	0	0	0	1	0	0	0	0	1
Otu01817	0	0	0	0	0	0	0	0	0	0	0	0	0	0	0	0	0	0	0	0	0	0	0	0	0	0	0	0	0	0	0	0	0	0	0	0	0	0	0	2	0	2	2	0	0	0	1	0	0
Otu01818	0	0	0	0	0	0	1	0	0	0	0	1	0	0	0	0	0	0	0	0	1	0	0	0	0	0	0	0	0	0	0	0	0	0	0	0	0	1	0	0	0	0	0	0	0	0	0	0	1
Otu01819	0	0	0	0	0	0	0	0	0	0	0	0	0	0	0	0	0	0	0	0	1	0	0	0	1	0	0	0	0	0	0	0	0	0	0	0	0	0	1	0	0	0	0	0	1	0	0	0	0
Otu01820	0	1	0	1	0	1	0	0	0	0	0	0	1	1	0	0	0	0	0	0	0	0	0	0	0	0	0	0	0	0	0	0	0	0	0	0	1	0	0	0	0	0	0	0	0	0	0	0	0
Otu01821	0	0	0	0	0	0	0	0	0	0	0	1	0	0	0	0	1	0	0	0	0	0	0	0	0	0	0	0	0	0	0	0	0	0	0	0	0	0	0	0	0	1	1	0	0	0	0	0	0
Otu01822	0	0	0	0	0	0	0	0	0	0	0	0	0	0	0	0	0	0	0	0	0	0	0	0	0	0	0	0	0	0	0	0	0	0	0	0	0	0	0	0	0	0	0	0	1	0	0	0	0
Otu01823	0	0	1	1	0	0	0	0	0	0	0	0	0	0	0	0	0	0	0	1	0	0	0	0	0	0	0	0	0	0	0	0	0	0	0	0	0	0	0	0	0	0	1	0	0	0	0	0	0
Otu01824	0	0	1	0	0	0	0	0	0	0	0	0	0	0	0	0	0	0	0	0	0	0	0	0	0	0	0	0	1	0	0	0	0	0	0	0	0	0	0	0	0	0	0	0	0	0	0	0	0
Otu01825	0	0	0	0	0	0	0	0	0	0	0	0	0	0	0	0	0	0	0	0	0	1	0	2	1	0	0	0	0	0	0	0	0	0	0	0	0	0	0	0	0	0	0	0	1	0	1	0	0
Otu01826	0	0	0	0	0	0	0	0	0	0	0	0	0	0	0	0	0	0	0	0	0	0	0	0	0	0	0	0	0	0	0	0	0	0	0	0	0	0	0	0	0	1	0	0	1	0	0	0	0
Otu01827	0	0	0	0	0	0	0	0	0	0	0	0	0	0	0	1	1	0	0	0	0	0	0	0	0	0	0	0	0	0	0	0	0	0	0	0	0	0	0	0	0	0	1	0	0	0	0	0	0
Otu01828	0	0	0	0	0	0	0	0	0	0	0	0	0	0	0	0	0	0	0	0	0	0	0	0	0	0	0	0	0	0	0	0	0	0	0	0	0	0	0	0	0	0	0	0	0	0	0	0	0
Otu01829	0	0	0	0	0	1	1	0	0	0	0	0	0	0	0	0	0	0	0	0	1	0	0	0	0	0	1	0	0	0	0	0	0	0	0	0	0	0	0	0	0	0	0	0	0	0	0	0	0
Otu01830	0	0	0	0	0	0	0	0	0	0	0	0	0	1	1	0	0	0	0	0	0	0	0	0	0	1	0	1	0	0	0	0	0	1	0	0	0	0	0	0	0	0	0	0	1	1	0	0	0
Otu01831	0	0	0	0	0	0	0	0	1	0	0	2	1	0	0	0	0	0	1	0	0	0	0	0	0	0	0	0	0	0	0	0	1	0	0	0	0	0	0	0	0	0	0	0	0	0	0	0	0
Otu01832	0	0	0	0	0	0	0	1	1	0	1	1	0	0	0	0	0	1	0	0	0	0	0	0	0	0	0	0	0	0	0	0	0	0	0	0	0	0	0	0	0	0	0	0	0	0	0	0	0
Otu01833	0	0	0	1	0	0	0	1	0	0	0	0	0	1	0	0	1	0	0	0	0	0	0	0	0	0	0	0	0	0	0	0	0	0	0	0	1	0	0	0	0	0	0	0	0	0	0	0	0
Otu01834	0	0	0	0	0	0	0	0	0	0	0	0	1	0	0	0	0	0	0	1	0	0	2	0	1	0	0	0	0	0	0	0	0	0	0	0	1	0	0	0	0	0	0	1	0	0	0	0	1
Otu01835	0	1	0	1	0	0	0	0	0	0	0	1	0	0	0	0	0	0	0	0	0	0	0	0	0	0	0	0	0	2	0	0	0	0	1	0	0	0	0	0	0	0	0	0	0	0	0	0	0
Otu01836	0	0	0	0	0	0	0	0	0	0	0	0	0	0	0	0	0	0	0	0	0	0	0	0	0	0	0	0	1	0	3	0	1	0	1	0	0	0	0	0	0	0	0	0	0	0	0	0	0
Otu01837	0	0	0	1	0	0	0	1	0	3	0	0	0	0	0	0	1	0	0	0	0	0	0	0	0	0	0	0	0	0	0	0	0	0	0	0	0	0	0	0	0	0	0	0	0	0	0	1	0
Otu01838	0	0	0	0	0	0	0	0	0	0	0	0	0	0	0	0	0	0	0	0	0	0	0	0	0	0	1	0	0	0	0	1	0	0	0	0	1	0	0	0	0	1	0	0	1	0	0	0	0
Otu01839	0	0	0	0	0	0	0	0	0	0	0	0	0	0	0	0	0	0	0	0	0	0	0	0	0	0	0	0	0	0	2	0	0	0	0	0	0	0	1	0	0	0	0	0	0	0	0	0	0
Otu01840	0	0	0	0	0	0	0	0	0	1	0	0	0	0	0	0	0	1	0	0	0	0	0	0	0	0	0	2	0	0	1	1	1	0	0	0	0	0	0	0	0	0	0	0	0	0	0	0	0
Otu01841	0	0	0	0	0	0	0	0	0	0	1	0	0	1	0	0	0	0	0	0	1	0	0	0	0	0	0	0	0	0	1	0	0	0	0	0	0	0	0	0	0	0	0	0	0	0	0	0	0
Otu01842	0	0	1	0	0	0	1	0	0	0	0	1	1	1	0	0	0	0	0	0	0	0	0	0	0	0	0	0	0	1	0	0	0	0	0	0	0	0	1	0	1	0	0	0	0	0	0	0	0
Otu01843	1	0	1	0	0	0	1	0	0	0	0	0	0	0	0	0	0	0	0	1	0	0	1	0	0	0	0	0	0	0	0	0	0	0	0	0	0	0	0	1	1	0	0	0	0	0	0	0	0
Otu01844	0	0	0	0	0	0	0	0	0	0	0	0	0	0	0	0	0	1	0	0	0	0	0	0	0	0	0	0	0	0	0	0	0	0	0	0	0	0	0	0	0	0	0	0	0	0	1	0	0
Otu01845	0	1	0	0	0	0	0	0	0	0	0	1	0	0	0	0	2	0	0	0	0	0	0	0	0	0	0	0	0	0	1	0	1	1	0	0	0	0	0	1	0	0	0	0	0	0	0	0	0
Otu01846	0	0	0	0	0	0	0	0	0	0	0	0	0	0	0	1	0	0	0	0	0	0	0	0	0	0	0	0	0	0	0	0	0	0	0	0	0	0	0	0	0	0	0	0	0	0	0	0	0
Otu01847	0	0	0	0	0	0	0	0	0	0	0	0	0	0	0	0	0	0	0	0	2	0	0	0	0	0	0	0	0	0	1	0	1	0	0	0	0	0	0	0	0	0	0	0	1	0	0	1	0
Otu01848	0	0	0	0	0	1	0	1	0	0	0	0	0	0	0	0	0	1	0	1	0	0	0	0	0	0	0	1	0	0	0	1	0	0	0	0	0	0	0	0	0	0	0	0	0	1	0	0	0
Otu01849	0	0	0	2	0	0	1	0	0	0	0	0	0	1	0	0	0	0	0	0	0	0	0	0	0	0	0	0	0	0	0	0	0	0	0	0	0	0	1	0	0	0	0	0	0	0	1	0	0
Otu01850	0	0	0	0	0	1	0	0	0	0	0	1	0	0	0	0	0	0	0	0	0	0	0	0	0	0	0	0	0	0	0	0	0	0	0	0	0	0	1	1	0	1	1	0	1	0	1	0	0
Otu01851	0	0	0	0	1	0	0	0	0	0	0	0	0	0	0	0	0	0	0	0	0	0	0	0	0	0	0	0	0	1	0	0	1	0	0	0	0	0	0	1	0	0	1	0	0	0	0	0	0
Otu01852	0	0	0	0	1	0	0	0	0	0	2	0	0	0	0	1	0	0	0	0	0	0	1	0	0	0	0	0	0	0	0	1	0	0	0	0	0	0	0	0	0	1	0	0	0	0	0	0	0
Otu01853	0	1	1	2	0	0	0	0	0	0	1	1	0	0	0	0	0	0	0	1	0	1	0	0	0	0	0	0	0	0	0	1	0	0	0	0	0	0	0	0	0	0	0	0	1	0	0	0	0
Otu01854	0	0	0	0	0	0	0	0	0	0	0	0	0	0	0	0	0	0	0	0	0	0	0	0	0	0	0	0	0	0	0	0	0	0	0	0	0	0	0	1	0	0	0	0	0	0	1	0	0
Otu01855	1	0	1	0	0	0	0	0	1	0	0	0	0	0	0	1	0	0	0	0	1	0	0	0	0	0	1	0	0	0	1	0	0	0	0	0	0	0	0	0	0	0	0	0	0	0	0	0	0
Otu01856	0	0	0	0	0	0	0	0	0	2	0	0	0	0	1	0	1	0	0	0	0	0	0	0	0	0	1	0	0	0	0	0	0	0	0	1	0	0	0	0	0	0	0	0	0	0	0	0	0
Otu01857	0	0	0	0	0	0	0	0	0	0	0	0	0	0	0	0	1	0	0	0	0	1	0	0	0	0	0	0	0	0	0	0	0	0	0	0	0	0	0	0	0	0	0	0	0	0	0	1	1
Otu01858	0	0	0	0	1	1	0	0	1	1	0	0	0	0	0	0	1	1	0	0	0	0	0	0	0	0	0	0	0	0	0	0	0	0	0	0	0	0	0	0	0	0	0	0	0	0	0	0	0
Otu01859	0	0	0	0	0	0	0	0	0	0	0	0	0	0	0	0	0	0	0	0	0	0	0	0	0	0	0	0	0	0	0	1	0	0	1	0	1	0	0	0	0	0	0	1	0	0	0	0	0
Otu01860	0	0	0	2	1	0	0	1	0	0	0	0	0	0	0	1	0	0	0	0	0	0	0	0	0	0	0	1	0	0	0	0	0	1	0	0	1	0	0	0	0	0	0	0	1	0	0	0	0
Otu01861	0	0	0	0	0	0	0	0	0	0	0	0	0	0	0	0	0	0	0	0	0	0	0	0	0	0	0	0	0	0	0	1	0	0	0	0	0	0	0	0	2	0	0	0	0	0	0	0	0
Otu01862	0	0	0	0	0	0	0	0	0	0	0	0	0	0	0	0	0	0	0	0	0	0	0	0	0	0	0	0	0	0	0	0	1	0	0	0	0	0	0	1	0	0	0	0	0	0	0	0	0
Otu01863	0	0	0	0	0	0	0	0	0	0	0	0	0	0	0	0	0	0	0	0	0	0	0	0	0	0	0	0	1	0	0	1	0	0	1	0	0	0	0	0	2	0	0	0	0	0	0	0	0
Otu01864	0	0	0	0	0	0	0	0	0	0	0	0	0	0	1	0	0	0	0	0	0	1	0	0	0	0	1	0	0	0	0	1	0	0	1	0	1	0	0	0	0	0	0	0	0	0	0	0	0
Otu01865	0	0	0	0	0	0	0	0	0	0	0	0	0	0	0	0	0	0	0	0	0	0	0	0	0	0	0	0	0	1	0	1	0	0	0	0	0	0	0	0	0	0	0	0	1	0	0	0	0
Otu01866	0	0	0	0	0	0	0	0	0	0	0	0	0	0	0	0	0	1	0	0	0	1	0	0	0	0	0	0	1	0	0	0	0	0	0	0	0	0	0	0	0	0	0	0	0	0	0	0	0
Otu01867	0	0	0	1	0	0	0	0	0	0	0	0	0	0	1	1	1	0	0	0	0	0	0	0	0	1	0	0	0	0	0	0	1	0	0	0	0	0	0	0	0	1	0	1	0	0	0	0	0
Otu01868	0	0	0	3	0	0	0	0	0	0	0	0	0	0	0	0	1	1	0	0	0	0	0	0	0	0	1	0	0	0	0	0	0	0	0	0	1	0	0	0	0	0	0	1	0	0	0	0	0
Otu01869	0	0	0	0	0	0	0	0	0	0	0	0	0	0	0	0	0	0	0	0	0	0	0	0	0	0	0	0	0	0	0	0	0	0	0	0	0	0	0	2	0	1	1	0	0	0	1	0	0
Otu01870	0	0	0	0	1	0	1	0	0	0	0	0	0	0	0	1	0	0	1	0	0	0	0	0	0	0	0	0	0	0	0	0	0	1	0	0	0	0	0	0	0	0	0	0	0	0	0	0	0
Otu01871	0	0	0	0	0	0	0	0	0	0	0	0	0	0	0	0	0	0	0	0	0	0	0	0	0	0	0	0	0	0	0	0	0	0	0	0	0	0	1	2	0	0	0	0	2	0	1	0	0
Otu01872	0	0	0	0	0	0	0	1	0	0	0	0	0	0	0	1	0	0	0	0	0	0	1	0	0	0	0	0	0	0	0	1	0	0	0	0	1	0	0	0	0	0	0	0	0	0	1	0	0
Otu01873	0	0	0	0	0	0	0	0	0	0	0	0	0	0	0	0	0	0	0	0	0	0	0	0	0	0	0	0	1	0	0	0	0	0	0	0	0	0	0	0	0	0	0	0	0	0	0	0	0
Otu01874	0	0	0	0	0	0	0	0	0	0	0	0	0	0	0	0	0	0	0	0	2	0	0	1	1	0	0	0	0	0	0	0	0	0	0	0	0	0	0	0	0	0	0	0	0	0	0	0	0
Otu01875	0	0	0	0	0	0	1	0	0	1	0	0	0	0	0	0	0	0	0	0	0	0	0	0	0	0	0	0	0	0	0	0	0	0	0	0	0	0	1	0	0	0	0	0	0	0	0	0	0
Otu01876	0	0	0	0	0	0	0	0	0	0	0	0	0	0	0	0	0	0	0	0	0	1	0	0	0	0	0	0	0	0	0	0	0	0	1	0	0	0	0	0	0	0	0	1	0	0	0	1	0
Otu01877	0	0	0	0	0	0	1	0	0	0	0	0	0	0	1	0	0	0	0	0	1	1	0	0	0	0	0	0	0	0	0	0	0	0	0	0	0	0	0	0	0	0	0	0	0	0	0	0	0
Otu01878	0	0	0	0	0	0	0	0	0	0	0	0	0	1	0	0	1	0	0	0	0	0	0	0	0	0	0	0	0	1	0	0	0	0	0	0	0	0	0	0	0	0	0	0	0	0	0	0	0
Otu01879	0	0	0	0	0	0	0	0	0	0	0	1	1	0	0	0	0	0	0	0	0	0	0	0	0	0	0	0	0	0	0	0	0	0	0	0	0	0	0	0	1	0	0	0	0	0	0	0	0
Otu01880	0	0	0	0	1	0	0	0	0	1	0	0	0	0	0	0	0	0	0	1	0	0	0	1	0	0	0	0	0	0	0	0	0	0	0	0	0	0	0	0	0	1	1	0	0	0	0	0	0
Otu01881	0	0	0	0	1	1	0	0	0	0	0	0	0	0	0	0	0	0	0	0	0	0	0	0	0	0	0	0	0	0	0	0	0	0	0	0	0	0	0	0	1	0	1	0	0	0	0	0	0
Otu01882	0	0	0	1	0	0	0	2	0	0	0	0	0	0	1	0	0	0	0	0	0	0	0	0	0	0	0	0	0	0	1	0	0	0	0	0	0	0	0	0	0	0	0	0	0	1	0	0	0
Otu01883	0	0	1	0	0	0	0	0	0	0	0	0	0	0	1	0	1	0	0	0	0	0	0	0	0	0	0	0	0	1	0	0	0	0	0	0	0	0	0	0	0	0	0	0	0	0	0	0	0
Otu01884	0	0	0	0	0	0	0	0	0	0	0	0	0	0	0	0	0	0	0	0	0	0	0	0	0	0	0	0	0	0	0	0	0	0	0	0	0	0	1	1	0	0	0	1	0	0	1	0	0
Otu01885	0	0	0	0	0	0	0	0	0	1	0	0	1	0	0	0	0	0	1	0	0	0	0	0	0	0	0	0	0	0	0	0	0	0	0	0	0	1	0	0	0	0	0	1	0	0	0	0	0
Otu01886	0	0	0	0	0	0	0	0	0	0	0	0	0	0	1	0	0	0	0	0	0	0	0	0	0	0	0	0	0	0	0	0	1	0	0	0	0	0	0	0	0	0	0	0	0	0	0	0	0
Otu01887	1	0	0	0	0	0	0	1	0	0	0	1	1	0	0	0	0	0	0	0	0	0	0	0	0	0	0	0	0	0	0	0	0	0	0	0	0	0	0	0	0	1	0	0	0	0	0	0	0
Otu01888	0	0	1	0	0	1	0	0	0	0	0	0	0	2	1	0	0	0	0	0	0	0	0	0	0	1	0	0	0	0	0	0	0	0	0	0	0	0	0	0	0	0	0	0	0	0	0	0	0
Otu01889	0	0	0	0	0	0	0	0	0	0	0	0	0	0	0	0	0	0	0	1	0	0	0	0	0	0	0	0	0	0	0	0	0	0	0	0	1	0	0	0	0	0	0	0	0	0	0	0	1
Otu01890	0	0	1	0	0	0	0	0	2	0	0	0	0	0	1	0	0	0	0	0	0	0	0	0	0	0	0	0	0	0	0	0	0	0	0	1	0	0	0	0	0	0	0	0	0	0	0	0	0
Otu01891	0	0	0	0	0	0	0	0	0	0	0	0	0	0	0	0	0	0	0	0	0	0	0	0	0	0	0	0	1	0	0	0	0	1	0	0	0	0	0	0	0	0	0	0	0	0	1	0	0
Otu01892	0	0	0	0	0	0	0	0	0	0	0	0	0	0	0	0	0	0	0	0	0	0	0	0	1	0	0	0	0	0	0	0	0	0	0	0	0	0	0	0	0	0	0	0	0	0	0	1	0
Otu01893	0	0	0	0	0	0	0	0	0	0	0	0	0	0	0	1	0	0	0	1	0	0	0	0	0	0	0	0	0	0	0	0	0	0	0	0	0	0	0	0	0	0	0	0	0	0	0	0	0
Otu01894	0	0	0	0	0	0	0	0	0	0	0	0	0	1	0	0	0	0	0	0	0	0	0	0	0	1	2	0	0	0	0	0	0	0	0	0	0	0	0	1	0	0	0	0	0	0	0	0	1
Otu01895	0	0	0	1	0	0	0	0	0	0	0	0	0	0	0	0	1	0	0	0	0	0	0	0	0	0	0	0	0	0	0	0	0	0	0	0	0	0	1	0	0	0	0	0	0	0	0	0	0
Otu01896	0	0	0	0	0	0	0	0	0	0	0	0	0	0	0	0	0	0	0	0	0	1	0	0	0	1	0	0	0	0	0	0	0	0	0	0	0	1	0	0	0	0	0	0	0	0	0	0	0
Otu01897	0	0	0	0	0	0	0	0	0	0	1	0	0	0	0	0	0	0	0	0	0	0	0	0	0	0	0	0	0	0	1	0	0	0	2	1	0	0	0	0	0	0	0	0	0	0	0	0	0
Otu01898	0	0	1	0	0	0	0	0	0	0	0	0	0	0	0	0	0	0	0	1	1	0	0	0	0	0	0	0	0	0	0	0	0	0	0	0	0	0	0	0	0	0	0	0	0	0	1	0	0
Otu01899	0	0	0	1	0	0	0	0	0	0	1	0	0	0	0	0	1	0	0	0	0	0	0	0	0	0	0	1	0	0	0	0	0	0	0	1	0	0	0	0	0	0	0	0	0	2	0	0	0
Otu01900	0	1	0	0	0	0	0	0	0	0	0	0	0	0	0	0	0	0	0	0	0	0	0	0	0	0	0	0	0	0	0	0	0	0	0	0	0	0	0	0	0	0	0	0	0	1	0	0	0
Otu01901	1	0	0	0	0	0	0	1	0	0	0	0	0	0	0	1	0	0	0	0	0	0	0	0	0	0	1	0	0	0	0	0	0	0	0	0	0	0	0	0	0	0	0	0	1	0	0	0	0
Otu01902	0	0	0	0	0	0	1	0	0	0	0	0	0	0	0	0	0	0	0	0	0	0	0	0	0	0	0	1	0	1	0	0	0	0	0	0	0	1	0	1	0	0	0	0	0	0	0	0	0
Otu01903	0	0	0	0	0	0	1	0	0	0	0	0	0	0	0	0	0	0	0	0	0	0	0	0	1	0	0	0	1	0	0	0	0	0	1	0	0	0	0	0	0	0	0	0	0	0	0	0	0
Otu01904	0	0	0	0	0	0	0	0	0	0	0	0	0	0	0	0	0	1	0	0	0	0	0	0	0	0	1	0	0	0	0	0	0	0	1	0	0	0	0	0	0	0	0	0	0	0	0	0	0
Otu01905	0	0	0	0	0	1	0	0	0	0	0	1	0	0	0	0	0	0	0	0	0	0	0	0	0	0	0	0	0	0	0	0	0	0	0	0	0	0	0	0	0	0	0	0	0	0	0	0	0
Otu01906	0	0	0	1	0	0	0	0	0	0	0	0	0	0	0	0	0	0	0	0	0	0	0	0	0	0	0	0	0	0	1	0	0	0	0	0	0	0	0	0	0	0	0	0	0	0	0	0	0
Otu01907	0	0	0	0	0	0	0	0	0	0	0	0	0	0	0	0	0	0	0	0	0	0	0	0	0	0	0	0	0	0	0	0	0	0	0	0	0	0	0	0	0	0	0	0	0	0	0	0	0
Otu01908	0	0	0	0	0	0	0	0	0	0	0	0	0	0	0	0	0	0	0	0	0	0	0	0	0	0	0	0	0	0	0	1	0	0	0	0	0	0	0	1	0	0	0	0	0	0	0	0	0
Otu01909	0	0	0	0	0	0	0	0	0	0	0	0	0	0	0	0	0	0	0	0	0	0	0	0	1	0	0	0	0	0	0	0	0	0	0	0	0	0	1	0	0	0	1	0	0	0	0	0	0
Otu01910	0	0	0	0	0	0	0	0	0	0	0	0	0	0	0	0	0	0	0	0	0	1	1	1	0	1	0	0	0	0	0	0	0	0	0	0	0	0	0	0	0	0	0	0	0	0	0	1	1
Otu01911	0	0	0	0	0	1	0	0	0	0	0	0	0	0	0	0	1	0	0	1	0	0	0	0	0	0	0	1	0	0	0	0	0	0	0	0	0	0	1	1	0	0	0	0	1	0	0	0	0
Otu01912	0	0	0	0	0	0	0	0	0	0	0	0	0	0	0	0	0	0	0	0	0	0	0	0	1	0	0	0	0	0	0	0	0	0	0	0	0	0	0	0	0	0	0	0	0	0	1	0	0
Otu01913	0	0	0	0	0	1	0	0	0	0	0	0	0	0	0	0	0	0	0	0	0	0	0	0	0	0	0	0	0	0	0	0	0	0	0	0	0	0	0	0	0	0	0	0	0	0	0	0	1
Otu01914	0	0	0	0	0	0	0	0	0	0	0	0	0	0	0	0	0	0	0	0	0	0	0	0	0	0	1	0	0	0	0	1	0	0	0	0	0	0	0	0	0	0	0	0	0	0	0	0	0
Otu01915	1	0	0	0	0	0	0	0	0	0	0	0	1	0	1	0	0	0	0	1	2	0	0	0	0	0	0	0	0	0	0	0	0	0	0	0	0	0	0	0	0	0	1	0	0	0	0	0	0
Otu01916	0	0	0	0	0	0	0	1	0	1	0	0	0	0	0	0	0	0	0	0	0	0	0	0	0	0	0	0	1	1	0	0	0	0	0	0	0	0	0	0	0	1	1	0	0	0	0	0	0
Otu01917	0	0	0	0	0	0	0	0	1	0	0	0	0	0	0	0	0	0	0	0	0	0	0	0	0	0	0	0	0	0	0	0	0	0	0	0	0	0	0	0	0	0	0	0	0	0	0	0	0
Otu01918	0	0	0	0	0	0	0	0	0	0	0	0	0	0	0	0	0	0	0	0	0	0	0	0	0	0	0	0	0	1	0	0	0	0	0	0	0	0	0	0	0	0	0	0	0	0	0	0	0
Otu01919	0	0	0	0	0	0	0	0	0	0	0	0	0	0	0	0	0	0	0	0	0	0	0	0	0	0	0	0	0	0	0	0	0	0	0	0	0	1	0	0	0	0	0	0	0	0	0	0	0
Otu01920	0	0	0	0	0	0	0	0	0	0	0	0	0	0	0	0	0	0	0	0	0	0	0	0	0	0	0	0	0	0	0	0	0	0	0	0	0	0	0	0	0	0	0	0	0	0	0	0	0
Otu01921	0	0	0	0	0	0	0	0	0	0	0	0	0	0	0	0	0	0	0	0	0	0	0	0	0	0	0	0	0	0	0	0	1	0	1	0	0	0	0	0	0	0	0	0	0	0	0	0	0
Otu01922	0	0	0	0	0	0	0	0	0	0	0	0	0	0	0	0	0	0	0	0	0	0	0	0	0	0	0	0	0	0	0	0	0	0	0	0	0	0	0	0	0	0	0	0	1	0	0	0	0
Otu01923	0	0	0	0	0	0	0	0	0	0	0	0	0	0	0	0	0	0	0	0	0	0	0	0	0	0	0	0	0	0	0	0	0	0	0	0	0	0	1	0	0	0	1	1	0	0	0	0	0
Otu01924	1	0	0	0	1	0	0	0	0	0	0	1	0	0	1	0	0	0	1	0	0	0	0	0	0	0	0	0	1	0	0	0	0	0	0	1	0	0	0	0	0	0	0	0	0	0	0	0	0
Otu01925	1	0	0	0	0	0	0	0	0	0	0	0	1	0	0	0	0	0	0	0	0	0	0	0	0	0	0	0	0	0	0	0	0	0	0	0	0	0	0	0	0	0	0	0	0	1	0	0	0
Otu01926	0	0	0	0	0	0	0	0	0	0	0	0	0	0	0	0	0	0	0	0	0	0	0	0	0	0	0	1	0	0	0	0	0	0	0	0	0	0	0	0	0	0	0	0	0	0	0	0	0
Otu01927	0	0	0	0	0	0	0	1	0	0	0	0	0	0	0	1	0	0	0	0	0	0	0	0	0	0	0	0	0	0	0	0	0	0	0	0	0	0	0	0	0	0	0	0	0	0	0	0	0
Otu01928	1	0	0	0	0	0	0	0	0	0	0	0	0	0	1	0	0	0	0	0	0	0	0	0	0	0	0	0	0	0	0	0	0	0	0	0	0	0	0	0	0	0	0	0	0	0	0	0	0
Otu01929	0	0	0	0	0	0	0	0	0	0	0	0	0	0	0	0	0	0	0	0	0	0	0	0	0	0	0	0	0	0	0	0	0	0	0	0	0	0	0	0	0	0	0	0	1	0	0	0	0
Otu01930	0	0	0	0	0	0	0	0	0	0	0	0	0	0	0	0	0	0	0	0	1	0	0	1	0	0	0	0	0	0	0	0	0	0	0	0	0	0	0	0	0	0	0	0	0	0	0	1	1
Otu01931	0	0	0	0	0	0	0	1	1	0	0	0	0	0	0	0	0	0	0	0	0	1	0	0	0	0	0	0	0	1	0	0	0	0	0	0	0	0	0	0	0	0	0	0	0	0	0	0	0
Otu01932	0	0	0	0	0	0	1	0	0	0	0	0	0	0	0	0	1	0	0	0	0	0	0	0	0	0	0	0	0	0	0	1	0	0	0	0	0	0	0	0	0	0	0	0	0	1	0	0	0
Otu01933	0	0	0	0	0	0	0	0	0	0	0	0	0	0	0	0	0	0	0	0	0	0	0	0	0	0	0	0	0	0	0	0	0	0	0	0	0	0	0	0	0	0	0	0	0	0	0	0	0
Otu01934	0	0	0	0	0	0	0	0	0	0	0	0	0	0	0	1	0	0	1	0	0	0	0	0	1	0	0	0	0	0	0	1	0	1	0	1	0	0	0	0	0	0	0	0	0	0	0	0	0
Otu01935	0	0	0	0	0	0	0	0	0	0	0	0	0	0	0	0	0	0	1	0	0	0	0	0	1	0	1	1	0	0	0	0	0	0	0	0	0	0	0	0	0	0	1	0	0	0	1	0	0
Otu01936	0	0	0	0	0	0	0	1	1	0	0	0	0	0	0	0	0	0	0	1	0	0	0	0	0	0	0	0	0	0	0	0	0	0	0	1	0	0	0	0	0	0	0	0	0	0	0	0	0
Otu01937	0	0	0	0	0	1	0	0	0	0	0	0	0	0	0	0	0	0	0	0	0	0	0	0	0	0	0	1	0	0	0	0	0	0	0	0	1	0	0	0	0	0	1	0	1	0	0	0	0
Otu01938	0	0	0	0	0	0	0	0	0	0	0	0	0	0	0	0	0	0	0	0	0	0	0	0	0	0	0	0	0	0	0	0	0	0	0	0	0	0	0	0	0	0	0	0	1	0	0	0	0
Otu01939	0	0	0	0	0	0	0	0	0	0	0	0	0	0	0	1	0	0	0	0	0	0	0	0	0	0	1	0	1	0	0	1	1	0	1	0	0	0	0	0	0	0	0	0	0	0	0	0	0
Otu01940	0	0	0	0	0	0	1	0	0	1	0	0	0	0	1	0	0	0	0	0	0	0	0	1	0	0	1	0	0	0	0	0	0	0	0	0	0	0	0	0	0	0	0	0	0	0	0	0	0
Otu01941	0	0	0	0	0	0	0	0	0	0	0	0	0	0	0	1	0	0	0	0	0	0	0	0	0	0	0	0	0	0	0	0	0	0	0	0	0	0	0	3	0	0	0	1	0	1	0	1	0
Otu01942	0	0	0	0	0	0	0	0	0	0	0	1	0	0	0	2	0	1	0	0	0	0	0	0	0	0	0	0	0	0	0	0	0	0	0	0	0	0	0	0	0	0	0	0	0	0	0	0	1
Otu01943	0	0	1	0	0	0	0	0	0	0	0	0	0	0	0	0	0	0	0	0	1	0	0	0	1	0	0	0	0	0	0	0	0	0	0	0	1	0	0	0	0	0	0	0	1	0	0	0	1
Otu01944	1	1	0	0	0	1	0	0	1	0	0	0	1	0	0	0	0	0	0	0	0	0	0	0	0	0	0	0	0	0	0	0	0	0	0	0	0	0	0	0	0	0	0	0	0	0	0	0	0
Otu01945	0	0	1	0	0	0	0	0	0	0	0	0	0	0	0	0	0	0	0	0	0	0	0	0	0	0	0	0	0	0	0	0	0	1	0	0	0	0	1	0	0	0	0	0	0	0	0	0	0
Otu01946	0	0	0	0	0	0	0	0	0	0	0	0	0	0	0	1	0	0	0	0	0	0	1	0	0	0	0	0	0	0	0	0	0	0	0	0	0	2	0	0	0	0	0	0	0	0	0	0	0
Otu01947	0	1	0	0	0	0	0	0	0	0	0	0	0	0	0	0	0	0	0	0	0	1	0	0	0	0	0	0	0	0	0	0	0	0	0	0	0	0	0	0	0	0	0	0	0	0	0	0	0
Otu01948	0	0	0	0	0	0	0	0	0	0	1	0	0	0	0	0	0	0	0	0	0	0	0	0	0	0	0	0	0	0	0	0	0	0	0	0	0	0	0	1	0	0	0	1	0	0	0	0	0
Otu01949	0	1	0	0	0	0	0	0	0	0	0	0	0	0	1	0	0	1	0	0	0	0	0	0	0	0	0	0	0	0	1	0	0	0	0	0	0	0	1	0	0	0	0	0	0	0	0	0	0
Otu01950	0	0	0	0	0	0	0	1	0	0	0	0	0	0	0	0	0	0	0	0	0	0	0	0	0	0	0	0	0	0	0	0	0	0	0	0	0	0	1	1	0	0	0	0	0	0	0	0	0
Otu01951	0	0	0	0	0	0	0	0	0	0	0	0	0	0	0	0	0	0	0	0	0	0	0	0	0	0	0	0	0	0	0	0	0	0	0	1	0	0	0	0	0	0	0	0	0	0	0	0	0
Otu01952	0	0	0	0	0	0	0	0	0	0	0	0	0	0	0	0	0	0	0	0	0	1	1	0	1	0	0	0	0	0	0	0	0	0	0	0	0	0	1	0	0	0	0	0	3	0	0	0	0
Otu01953	0	0	0	0	0	0	0	0	0	0	0	0	0	0	0	0	0	0	0	0	0	0	0	0	0	0	0	0	0	0	0	0	0	0	0	0	0	0	0	0	0	0	0	0	0	0	0	1	0
Otu01954	0	0	0	0	0	0	0	0	0	0	0	0	0	0	0	0	2	0	0	0	0	0	0	0	0	0	0	0	0	0	1	0	0	0	0	0	1	0	0	0	0	0	0	0	0	0	0	0	0
Otu01955	0	0	0	0	0	0	0	0	0	0	0	0	0	0	0	0	0	0	0	0	0	0	0	1	0	0	0	0	0	0	0	0	0	0	0	0	0	0	0	1	1	0	1	0	1	0	1	1	0
Otu01956	0	0	0	0	0	0	0	0	0	0	0	0	0	0	0	0	0	1	0	1	1	0	1	0	0	0	0	0	0	0	1	0	0	0	0	0	0	0	0	0	0	0	0	0	0	0	0	0	0
Otu01957	0	0	0	1	0	2	0	1	0	0	0	0	0	2	1	0	0	0	0	0	0	0	0	0	0	0	0	0	0	0	0	0	0	0	0	0	0	0	0	0	0	0	0	0	0	0	0	0	0
Otu01958	0	0	0	0	0	0	0	0	0	0	0	0	0	0	0	0	0	0	0	0	0	0	0	0	0	0	0	0	0	0	0	0	0	0	0	0	0	0	0	0	0	0	1	1	0	0	1	0	0
Otu01959	0	0	0	0	1	1	0	0	0	0	0	0	1	1	0	0	0	0	0	0	0	0	0	0	0	0	1	0	1	0	0	0	0	0	0	0	0	0	0	0	0	0	0	0	0	0	0	0	0
Otu01960	0	0	0	0	0	0	0	0	0	0	0	0	0	0	0	0	0	0	0	0	0	0	0	0	0	0	0	0	0	0	0	0	0	0	0	0	0	0	0	0	2	1	0	0	1	2	1	0	0
Otu01961	0	0	1	0	0	0	0	0	0	0	0	0	0	0	0	0	0	0	0	1	0	0	0	0	0	0	0	1	0	0	0	0	0	0	0	0	1	0	0	0	0	0	0	0	0	0	0	0	0
Otu01962	0	0	0	0	0	0	0	0	0	0	1	0	0	1	1	0	1	0	1	0	2	0	0	0	0	0	0	0	0	0	0	0	1	0	0	0	0	0	0	0	0	0	0	0	0	0	0	0	0
Otu01963	0	0	0	0	0	0	0	0	0	0	0	0	0	0	0	0	0	0	0	0	0	0	0	1	0	0	0	0	0	0	0	0	1	0	0	0	0	0	0	1	0	0	0	0	0	0	0	0	0
Otu01964	0	0	0	0	0	0	0	0	0	0	0	0	0	0	0	0	0	0	0	0	0	0	0	0	0	0	0	0	1	0	0	0	0	0	0	0	0	0	0	0	0	0	0	0	0	0	0	0	0
Otu01965	1	0	0	0	0	0	0	0	0	0	0	0	0	0	0	0	0	0	0	0	0	0	0	0	0	0	0	0	0	0	0	0	0	1	0	0	1	0	0	0	0	0	0	0	0	0	0	0	0
Otu01966	0	0	0	0	0	0	0	0	1	0	1	0	0	0	0	0	0	0	0	0	0	0	1	0	0	0	0	0	0	0	0	1	0	0	0	0	0	0	0	0	0	0	0	0	0	0	0	0	0
Otu01967	1	0	0	0	0	0	0	0	0	0	0	0	0	1	0	0	0	0	0	0	0	0	0	0	0	0	0	0	0	0	0	0	0	0	0	0	0	0	1	0	0	0	0	0	0	0	0	0	0
Otu01968	0	0	0	0	1	1	0	1	0	0	0	0	1	0	0	1	0	0	1	0	0	0	0	0	0	0	0	0	0	0	0	0	0	0	0	0	1	0	0	1	0	0	0	0	0	0	0	0	0
Otu01969	0	0	0	0	0	0	0	0	0	0	0	0	0	0	0	0	0	0	0	0	0	0	0	0	0	0	0	0	0	0	0	0	0	0	0	1	0	0	0	0	0	1	0	0	0	0	0	0	1
Otu01970	0	0	0	0	0	0	0	0	0	0	0	0	0	0	0	0	0	0	0	0	0	0	0	1	0	0	0	0	0	0	0	1	1	1	0	0	0	0	0	0	0	0	0	0	0	0	0	0	0
Otu01971	0	1	1	1	0	0	0	0	0	0	0	0	0	1	0	0	0	0	0	1	0	0	0	0	0	0	0	0	0	0	0	0	0	0	0	0	0	0	0	0	0	0	0	0	0	0	1	0	0
Otu01972	0	0	0	0	0	0	0	0	0	0	0	0	0	0	0	0	0	0	0	0	0	0	0	0	0	0	0	0	0	0	0	0	0	0	0	0	0	0	0	1	1	0	0	1	1	1	0	0	0
Otu01973	0	0	0	0	0	0	0	0	0	0	0	0	0	0	0	0	1	0	0	0	0	0	0	0	0	0	0	0	0	0	0	0	0	0	0	0	0	0	0	0	0	1	0	0	0	0	0	1	0
Otu01974	0	0	0	0	0	0	0	0	0	0	0	0	0	0	0	0	0	0	0	0	0	0	0	0	0	0	0	0	0	0	0	0	0	0	0	0	0	0	0	0	0	1	2	0	0	0	2	0	0
Otu01975	0	1	0	0	0	0	0	0	0	0	0	0	2	0	0	1	0	0	1	0	0	0	0	0	0	0	0	0	0	0	0	0	0	0	0	0	0	0	0	0	0	0	0	0	0	0	0	0	0
Otu01976	0	0	0	0	0	0	0	0	0	0	0	0	0	0	0	0	0	0	0	0	0	0	0	0	1	0	0	0	0	0	0	0	0	0	0	0	0	0	0	0	0	0	0	0	0	0	0	0	0
Otu01977	0	0	0	0	0	0	0	0	0	0	0	0	0	0	0	0	0	0	0	0	0	0	0	0	0	0	0	0	0	0	0	0	1	0	0	0	0	0	0	0	0	0	0	0	0	0	0	1	1
Otu01978	1	0	0	0	0	0	0	1	0	0	0	0	0	0	0	0	0	0	0	0	0	0	0	0	0	0	1	0	1	0	0	0	0	0	0	1	1	0	0	0	0	0	0	0	1	0	0	0	0
Otu01979	0	0	1	0	0	0	0	0	0	0	0	0	0	0	1	1	0	1	0	0	0	0	0	0	0	0	0	0	0	0	0	0	0	0	0	0	0	0	0	0	0	0	0	0	1	0	0	0	0
Otu01980	0	0	0	0	0	1	1	0	0	2	0	0	1	0	0	0	0	0	0	0	0	0	0	0	0	0	0	0	0	0	0	0	0	0	1	0	0	0	0	0	0	0	0	0	0	0	0	0	0
Otu01981	0	0	0	0	0	0	0	0	0	0	0	0	0	0	0	0	0	0	0	0	0	0	0	0	1	0	0	0	0	0	0	0	0	1	0	0	0	0	0	0	0	0	0	0	1	0	0	0	0
Otu01982	0	0	0	0	0	0	0	0	0	0	0	0	0	0	0	0	0	1	1	0	0	0	0	0	0	0	0	0	0	0	0	0	0	0	1	0	0	0	0	0	0	0	0	0	0	0	0	0	0
Otu01983	0	0	0	1	0	0	0	0	0	0	0	0	0	0	0	0	0	0	0	0	0	0	0	0	0	0	0	0	0	0	0	0	0	0	0	0	0	0	0	0	0	0	0	0	0	0	0	0	0
Otu01984	1	0	0	0	0	0	0	0	0	1	1	1	0	0	1	0	0	0	0	0	0	0	0	0	0	0	0	0	0	0	0	0	0	0	0	0	0	0	0	0	0	0	0	0	0	0	0	0	0
Otu01985	0	0	0	0	0	0	0	0	0	0	0	0	0	0	0	0	0	0	0	0	0	0	0	0	0	0	0	0	0	0	0	0	0	0	0	0	0	0	1	0	0	0	0	0	0	0	0	0	0
Otu01986	0	0	1	0	1	0	1	0	0	1	0	0	0	0	0	0	0	0	0	0	0	0	0	0	0	0	0	0	0	1	0	0	0	0	0	0	0	0	1	0	0	0	0	0	0	0	0	0	0
Otu01987	0	0	0	1	0	0	0	0	0	0	0	0	0	0	0	0	0	0	0	0	0	0	0	1	0	0	0	0	0	0	0	0	0	0	0	0	0	1	0	0	0	0	0	0	1	0	2	0	0
Otu01988	0	0	0	0	0	0	0	0	0	0	1	0	0	0	0	0	0	0	0	0	0	0	0	0	0	0	0	0	0	0	0	0	0	0	0	0	0	0	2	0	0	1	0	0	0	0	0	0	0
Otu01989	0	1	2	0	0	0	1	1	0	0	0	1	0	1	0	0	0	0	0	0	0	0	0	0	0	0	0	0	0	0	0	0	0	0	0	0	0	0	0	0	0	0	0	0	0	0	0	0	1
Otu01990	0	0	0	0	0	0	0	1	0	0	0	0	0	0	0	0	0	0	0	0	0	0	0	0	0	0	0	0	0	1	0	0	0	0	1	0	0	0	0	0	0	0	0	0	0	1	0	0	0
Otu01991	0	0	0	0	0	0	0	0	0	0	0	0	0	0	0	0	0	0	0	0	0	0	0	0	0	0	0	0	0	0	0	0	0	0	0	0	0	0	0	0	0	0	3	0	0	0	1	0	0
Otu01992	1	0	2	0	1	0	0	0	0	0	1	0	0	1	0	0	0	0	0	0	0	1	1	0	0	0	0	0	0	0	0	0	0	0	0	0	0	0	0	0	0	0	0	0	0	0	0	0	0
Otu01993	0	0	0	0	0	0	0	0	0	0	0	0	0	0	1	0	0	0	0	0	0	0	0	0	0	0	0	0	0	0	0	0	0	0	0	0	0	0	0	0	0	0	1	0	0	0	0	0	0
Otu01994	0	1	0	0	0	0	1	0	0	0	0	0	0	1	0	0	0	0	0	0	0	0	0	0	0	0	0	0	0	2	0	0	0	1	0	0	1	0	1	0	0	0	0	0	0	0	0	0	0
Otu01995	0	0	1	0	0	0	0	0	0	0	0	0	0	0	0	0	1	0	0	0	0	0	0	0	0	0	0	0	0	0	0	0	0	0	0	0	0	0	0	0	0	0	0	0	0	0	0	0	0
Otu01996	0	0	1	0	0	0	1	0	0	0	0	0	0	0	0	0	1	0	0	0	0	0	0	0	0	0	0	0	0	0	0	0	0	0	0	0	0	0	0	0	0	0	0	0	0	0	0	0	0
Otu01997	0	0	0	0	0	0	0	0	0	0	0	0	0	0	0	0	0	0	0	1	0	0	1	0	0	0	0	0	0	0	0	0	0	0	1	0	0	0	0	0	1	0	0	0	0	0	0	0	0
Otu01998	0	0	0	0	0	0	0	1	0	0	1	0	0	0	1	0	0	0	0	1	0	0	0	0	0	0	0	0	0	0	1	0	0	0	0	0	0	0	0	0	1	0	0	0	0	0	0	0	0
Otu01999	0	1	0	0	0	1	0	0	0	1	0	0	0	0	0	0	0	0	0	0	0	1	0	0	0	0	0	0	0	0	0	1	0	0	0	0	0	0	0	0	0	0	0	0	0	1	1	0	0
[truncated: 62,190 more rows]
[truncated: 26 more columns]

## Sheet: taxa
OTU	Size	Taxonomy
Otu00001	398688	Bacteria	Bacteroidetes	Bacteroidia	Bacteroidales	Bacteroidaceae	Phocaeicola	vulgatus
Otu00002	283964	Bacteria	Actinobacteria	Actinobacteria	Bifidobacteriales	Bifidobacteriaceae	Bifidobacterium	Bifidobacterium_unclassified
Otu00003	142671	Bacteria	Bacteroidetes	Bacteroidia	Bacteroidales	Bacteroidaceae	Bacteroides	ovatus
Otu00004	100007	Bacteria	Firmicutes	Clostridia	Clostridiales	Lachnospiraceae	Blautia	Blautia_unclassified
Otu00005	93076	Bacteria	Firmicutes	Clostridia	Clostridiales	Ruminococcaceae	Faecalibacterium	prausnitzii
Otu00006	79719	Bacteria	Firmicutes	Clostridia	Clostridiales	Ruminococcaceae	Ruminococcus	bromii
Otu00007	76028	Bacteria	Firmicutes	Clostridia	Clostridiales	Lachnospiraceae	Fusicatenibacter	saccharivorans
Otu00008	74367	Bacteria	Firmicutes	Clostridia	Clostridiales	Lachnospiraceae	Blautia	Blautia_unclassified
Otu00009	72188	Bacteria	Firmicutes	Clostridia	Clostridiales	Ruminococcaceae	Faecalibacterium	prausnitzii
Otu00010	68116	Bacteria	Proteobacteria	Gammaproteobacteria	Enterobacterales	Enterobacteriaceae	Enterobacteriaceae_unclassified	Enterobacteriaceae_unclassified
Otu00011	67915	Bacteria	Firmicutes	Clostridia	Clostridiales	Lachnospiraceae	Dorea	longicatena
Otu00012	62454	Bacteria	Firmicutes	Clostridia	Clostridiales	Lachnospiraceae	Agathobacter	Agathobacter_unclassified
Otu00013	62272	Bacteria	Actinobacteria	Coriobacteriia	Coriobacteriales	Coriobacteriaceae	Collinsella	aerofaciens
Otu00014	55984	Bacteria	Bacteroidetes	Bacteroidia	Bacteroidales	Bacteroidaceae	Bacteroides	uniformis
Otu00015	54439	Bacteria	Firmicutes	Clostridia	Clostridiales	Lachnospiraceae	Anaerobutyricum	Anaerobutyricum_unclassified
Otu00016	52133	Bacteria	Proteobacteria	Betaproteobacteria	Burkholderiales	Sutterellaceae	Sutterella	wadsworthensis
Otu00017	49413	Bacteria	Firmicutes	Clostridia	Clostridiales	Ruminococcaceae	Ruminococcaceae_unclassified	Ruminococcaceae_unclassified
Otu00018	48423	Bacteria	Firmicutes	Clostridia	Clostridiales	Ruminococcaceae	Ruminococcaceae_unclassified	Ruminococcaceae_unclassified
Otu00019	47565	Archaea	Euryarchaeota	Methanobacteria	Methanobacteriales	Methanobacteriaceae	Methanobrevibacter	Methanobrevibacter_unclassified
Otu00020	45367	Bacteria	Firmicutes	Clostridia	Clostridiales	Lachnospiraceae	Anaerotignum	Anaerotignum_unclassified
Otu00021	43877	Bacteria	Firmicutes	Clostridia	Clostridiales	Lachnospiraceae	Blautia	luti
Otu00022	39288	Bacteria	Proteobacteria	Betaproteobacteria	Burkholderiales	Sutterellaceae	Parasutterella	excrementihominis
Otu00023	33351	Bacteria	Firmicutes	Clostridia	Clostridiales	Ruminococcaceae	Ruminococcaceae_unclassified	Ruminococcaceae_unclassified
Otu00024	33334	Bacteria	Bacteroidetes	Bacteroidia	Bacteroidales	Bacteroidaceae	Bacteroides	Bacteroides_unclassified
Otu00025	30021	Bacteria	Bacteroidetes	Bacteroidia	Bacteroidales	Bacteroidaceae	Bacteroides	Bacteroides_unclassified
Otu00026	29908	Bacteria	Bacteroidetes	Bacteroidia	Bacteroidales	Porphyromonadaceae	Parabacteroides	merdae
Otu00027	27174	Bacteria	Firmicutes	Negativicutes	Veillonellales	Veillonellaceae	Dialister	Dialister_unclassified
Otu00028	26658	Bacteria	Verrucomicrobia	Verrucomicrobiae	Verrucomicrobiales	Akkermansiaceae	Akkermansia	muciniphila
Otu00029	23721	Bacteria	Proteobacteria	Gammaproteobacteria	Enterobacterales	Enterobacteriaceae	Enterobacteriaceae_unclassified	Enterobacteriaceae_unclassified
Otu00030	23579	Bacteria	Bacteroidetes	Bacteroidia	Bacteroidales	Prevotellaceae	Prevotella	stercorea
Otu00031	22476	Bacteria	Firmicutes	Clostridia	Clostridiales	Lachnospiraceae	Lachnospiraceae_unclassified	Lachnospiraceae_unclassified
Otu00032	21756	Bacteria	Firmicutes	Clostridia	Clostridiales	Lachnospiraceae	Lachnospiraceae_unclassified	Lachnospiraceae_unclassified
Otu00033	21599	Bacteria	Firmicutes	Clostridia	Clostridiales	Lachnospiraceae	Anaerostipes	hadrus
Otu00034	21475	Bacteria	Bacteroidetes	Bacteroidia	Bacteroidales	Bacteroidaceae	Bacteroides	Bacteroides_unclassified
Otu00035	21437	Bacteria	Firmicutes	Negativicutes	Acidaminococcales	Acidaminococcaceae	Phascolarctobacterium	faecium
Otu00036	21433	Bacteria	Firmicutes	Clostridia	Clostridiales	Lachnospiraceae	Lachnospiraceae_unclassified	Lachnospiraceae_unclassified
Otu00037	21142	Bacteria	Firmicutes	Clostridia	Clostridiales	Lachnospiraceae	Blautia	obeum
Otu00038	20651	Bacteria	Firmicutes	Clostridia	Clostridiales	Ruminococcaceae	Ruminococcaceae_unclassified	Ruminococcaceae_unclassified
Otu00039	19580	Bacteria	Firmicutes	Clostridia	Clostridiales	Lachnospiraceae	Coprococcus	catus
Otu00040	18747	Bacteria	Firmicutes	Clostridia	Clostridiales	Lachnospiraceae	Mediterraneibacter	Mediterraneibacter_unclassified
Otu00041	18289	Bacteria	Firmicutes	Clostridia	Clostridiales	Lachnospiraceae	Lachnospiraceae_unclassified	Lachnospiraceae_unclassified
Otu00042	17914	Bacteria	Firmicutes	Clostridia	Clostridiales	Lachnospiraceae	Coprococcus	comes
Otu00043	17672	Bacteria	Bacteroidetes	Bacteroidia	Bacteroidales	Bacteroidaceae	Bacteroides	thetaiotaomicron VPI-5482
Otu00044	17538	Bacteria	Firmicutes	Clostridia	Clostridiales	Ruminococcaceae	Ruminococcaceae_unclassified	Ruminococcaceae_unclassified
Otu00045	17369	Bacteria	Bacteroidetes	Bacteroidia	Bacteroidales	Rikenellaceae	Alistipes	Alistipes_unclassified
Otu00046	17221	Bacteria	Firmicutes	Clostridia	Clostridiales	Lachnospiraceae	Lachnospira	Lachnospira_unclassified
Otu00047	15735	Bacteria	Firmicutes	Clostridia	Clostridiales	Ruminococcaceae	Ruminococcaceae_unclassified	Ruminococcaceae_unclassified
Otu00048	14353	Bacteria	Bacteroidetes	Bacteroidia	Bacteroidales	Porphyromonadaceae	Parabacteroides	distasonis
Otu00049	13032	Bacteria	Firmicutes	Clostridia	Clostridiales	Clostridiaceae 1	Clostridium sensu stricto	Clostridium sensu stricto_unclassified
Otu00050	12536	Bacteria	Firmicutes	Clostridia	Clostridiales	Lachnospiraceae	Lachnospiraceae_unclassified	Lachnospiraceae_unclassified
Otu00051	11995	Bacteria	Firmicutes	Clostridia	Clostridiales	Ruminococcaceae	Ruminococcaceae_unclassified	Ruminococcaceae_unclassified
Otu00052	11900	Bacteria	Bacteroidetes	Bacteroidia	Bacteroidales	Bacteroidaceae	Phocaeicola	vulgatus
Otu00053	11844	Bacteria	Firmicutes	Clostridia	Clostridiales	Peptostreptococcaceae	Romboutsia	sedimentorum
Otu00054	11225	Bacteria	Bacteroidetes	Bacteroidia	Bacteroidales	Barnesiellaceae	Barnesiella	intestinihominis
Otu00055	10723	Bacteria	Firmicutes	Firmicutes_unclassified	Firmicutes_unclassified	Firmicutes_unclassified	Firmicutes_unclassified	Firmicutes_unclassified
Otu00056	9764	Bacteria	Firmicutes	Clostridia	Clostridiales	Clostridiaceae 1	Clostridium sensu stricto	Clostridium sensu stricto_unclassified
Otu00057	9684	Bacteria	Firmicutes	Clostridia	Clostridiales	Lachnospiraceae	Lachnospiraceae_unclassified	Lachnospiraceae_unclassified
Otu00058	9438	Bacteria	Bacteroidetes	Bacteroidia	Bacteroidales	Rikenellaceae	Alistipes	putredinis
Otu00059	9041	Bacteria	Firmicutes	Erysipelotrichia	Erysipelotrichales	Erysipelotrichaceae	Turicibacter	sanguinis
Otu00060	9037	Bacteria	Firmicutes	Negativicutes	Veillonellales	Veillonellaceae	Dialister	invisus
Otu00061	8991	Bacteria	Firmicutes	Clostridia	Clostridiales	Lachnospiraceae	Lachnospiraceae_unclassified	Lachnospiraceae_unclassified
Otu00062	8372	Bacteria	Firmicutes	Clostridia	Clostridiales	Lachnospiraceae	Lachnospiracea_incertae_sedis	Lachnospiracea_incertae_sedis_unclassified
Otu00063	8311	Bacteria	Firmicutes	Bacilli	Lactobacillales	Streptococcaceae	Lactococcus	lactis
Otu00064	8276	Bacteria	Firmicutes	Clostridia	Clostridiales	Lachnospiraceae	Lachnospiraceae_unclassified	Lachnospiraceae_unclassified
Otu00065	8113	Bacteria	Proteobacteria	Deltaproteobacteria	Desulfovibrionales	Desulfovibrionaceae	Bilophila	wadsworthia
Otu00066	7212	Bacteria	Actinobacteria	Actinobacteria	Bifidobacteriales	Bifidobacteriaceae	Bifidobacterium	Bifidobacterium_unclassified
Otu00067	6805	Bacteria	Firmicutes	Clostridia	Clostridiales	Lachnospiraceae	Coprococcus	eutactus
Otu00068	6652	Bacteria	Firmicutes	Clostridia	Clostridiales	Lachnospiraceae	Lachnospiraceae_unclassified	Lachnospiraceae_unclassified
Otu00069	6294	Bacteria	Lentisphaerae	Lentisphaeria	Victivallales	Victivallaceae	Victivallis	vadensis
Otu00070	6143	Bacteria	Firmicutes	Clostridia	Clostridiales	Ruminococcaceae	Ruminococcaceae_unclassified	Ruminococcaceae_unclassified
Otu00071	6026	Bacteria	Firmicutes	Clostridia	Clostridiales	Clostridiales_unclassified	Clostridiales_unclassified	Clostridiales_unclassified
Otu00072	5933	Bacteria	Actinobacteria	Coriobacteriia	Coriobacteriales	Coriobacteriaceae	Senegalimassilia	anaerobia
Otu00073	5887	Bacteria	Bacteria_unclassified	Bacteria_unclassified	Bacteria_unclassified	Bacteria_unclassified	Bacteria_unclassified	Bacteria_unclassified
Otu00074	5866	Bacteria	Firmicutes	Clostridia	Clostridiales	Lachnospiraceae	Lachnospiraceae_unclassified	Lachnospiraceae_unclassified
Otu00075	5852	Bacteria	Firmicutes	Clostridia	Clostridiales	Clostridiaceae 1	Clostridium sensu stricto	butyricum
Otu00076	5585	Bacteria	Firmicutes	Clostridia	Clostridiales	Lachnospiraceae	Lachnospiraceae_unclassified	Lachnospiraceae_unclassified
Otu00077	5520	Bacteria	Firmicutes	Clostridia	Clostridiales	Clostridiales_unclassified	Clostridiales_unclassified	Clostridiales_unclassified
Otu00078	5358	Bacteria	Firmicutes	Clostridia	Clostridiales	Lachnospiraceae	Coprococcus	eutactus
Otu00079	5251	Bacteria	Firmicutes	Clostridia	Clostridiales	Ruminococcaceae	Ruminococcaceae_unclassified	Ruminococcaceae_unclassified
Otu00080	5238	Bacteria	Firmicutes	Firmicutes_unclassified	Firmicutes_unclassified	Firmicutes_unclassified	Firmicutes_unclassified	Firmicutes_unclassified
Otu00081	5029	Bacteria	Firmicutes	Clostridia	Clostridiales	Clostridiales_unclassified	Clostridiales_unclassified	Clostridiales_unclassified
Otu00082	4957	Bacteria	Bacteria_unclassified	Bacteria_unclassified	Bacteria_unclassified	Bacteria_unclassified	Bacteria_unclassified	Bacteria_unclassified
Otu00083	4910	Bacteria	Firmicutes	Clostridia	Clostridiales	Clostridiales_unclassified	Clostridiales_unclassified	Clostridiales_unclassified
Otu00084	4894	Bacteria	Actinobacteria	Coriobacteriia	Eggerthellales	Eggerthellaceae	Eggerthella	lenta
Otu00085	4789	Bacteria	Firmicutes	Clostridia	Clostridiales	Ruminococcaceae	Agathobaculum	Agathobaculum_unclassified
Otu00086	4717	Bacteria	Firmicutes	Firmicutes_unclassified	Firmicutes_unclassified	Firmicutes_unclassified	Firmicutes_unclassified	Firmicutes_unclassified
Otu00087	4427	Bacteria	Bacteroidetes	Bacteroidia	Bacteroidales	Odoribacteraceae	Butyricimonas	Butyricimonas_unclassified
Otu00088	4412	Bacteria	Firmicutes	Erysipelotrichia	Erysipelotrichales	Erysipelotrichaceae	Faecalibacillus	Faecalibacillus_unclassified
Otu00089	3948	Bacteria	Firmicutes	Clostridia	Clostridiales	Lachnospiraceae	Lachnospiraceae_unclassified	Lachnospiraceae_unclassified
Otu00090	3868	Bacteria	Firmicutes	Clostridia	Clostridiales	Clostridiales_Incertae Sedis XIII	Ihubacter	Ihubacter_unclassified
Otu00091	3859	Bacteria	Firmicutes	Clostridia	Clostridiales	Clostridiales_unclassified	Clostridiales_unclassified	Clostridiales_unclassified
Otu00092	3810	Bacteria	Bacteroidetes	Bacteroidia	Bacteroidales	Rikenellaceae	Alistipes	obesi
Otu00093	3718	Bacteria	Firmicutes	Clostridia	Clostridiales	Clostridiales_unclassified	Clostridiales_unclassified	Clostridiales_unclassified
Otu00094	3568	Bacteria	Firmicutes	Clostridia	Clostridiales	Eubacteriaceae	Eubacterium	coprostanoligenes
Otu00095	3402	Bacteria	Bacteroidetes	Bacteroidia	Bacteroidales	Odoribacteraceae	Odoribacter	splanchnicus
Otu00096	3386	Bacteria	Firmicutes	Clostridia	Clostridiales	Ruminococcaceae	Flintibacter	Flintibacter_unclassified
Otu00097	3380	Bacteria	Firmicutes	Clostridia	Clostridiales	Lachnospiraceae	Lachnospiraceae_unclassified	Lachnospiraceae_unclassified
Otu00098	3375	Bacteria	Firmicutes	Clostridia	Clostridiales	Lachnospiraceae	Lachnospiracea_incertae_sedis	Lachnospiracea_incertae_sedis_unclassified
Otu00099	3340	Bacteria	Firmicutes	Firmicutes_unclassified	Firmicutes_unclassified	Firmicutes_unclassified	Firmicutes_unclassified	Firmicutes_unclassified
Otu00100	3230	Bacteria	Firmicutes	Clostridia	Clostridiales	Clostridiaceae 1	Clostridium sensu stricto	chartatabidum
Otu00101	3170	Bacteria	Firmicutes	Clostridia	Clostridiales	Lachnospiraceae	Lachnospiraceae_unclassified	Lachnospiraceae_unclassified
Otu00102	3082	Bacteria	Firmicutes	Clostridia	Clostridiales	Ruminococcaceae	Ruminococcaceae_unclassified	Ruminococcaceae_unclassified
Otu00103	3067	Bacteria	Firmicutes	Clostridia	Clostridiales	Lachnospiraceae	Lachnospiraceae_unclassified	Lachnospiraceae_unclassified
Otu00104	3056	Bacteria	Firmicutes	Clostridia	Clostridiales	Clostridiales_Incertae Sedis XIII	Clostridiales_Incertae Sedis XIII_unclassified	Clostridiales_Incertae Sedis XIII_unclassified
Otu00105	3007	Bacteria	Firmicutes	Clostridia	Clostridiales	Peptostreptococcaceae	Peptostreptococcaceae_unclassified	Peptostreptococcaceae_unclassified
Otu00106	2996	Bacteria	Firmicutes	Clostridia	Clostridiales	Clostridiaceae 1	Clostridium sensu stricto	Clostridium sensu stricto_unclassified
Otu00107	2921	Bacteria	Firmicutes	Clostridia	Clostridiales	Lachnospiraceae	Lachnospiraceae_unclassified	Lachnospiraceae_unclassified
Otu00108	2770	Bacteria	Actinobacteria	Coriobacteriia	Eggerthellales	Eggerthellaceae	Adlercreutzia	equolifaciens
Otu00109	2709	Bacteria	Firmicutes	Clostridia	Clostridiales	Clostridiales_Incertae Sedis XIII	Clostridiales_Incertae Sedis XIII_unclassified	Clostridiales_Incertae Sedis XIII_unclassified
Otu00110	2605	Bacteria	Firmicutes	Clostridia	Clostridiales	Lachnospiraceae	Enterocloster	bolteae
Otu00111	2604	Bacteria	Firmicutes	Clostridia	Clostridiales	Ruminococcaceae	Neglecta	Neglecta_unclassified
Otu00112	2533	Bacteria	Firmicutes	Clostridia	Clostridiales	Lachnospiraceae	Blautia	Blautia_unclassified
Otu00113	2510	Bacteria	Firmicutes	Clostridia	Clostridiales	Ruminococcaceae	Flavonifractor	plautii
Otu00114	2406	Bacteria	Firmicutes	Clostridia	Clostridiales	Lachnospiraceae	Lachnospiraceae_unclassified	Lachnospiraceae_unclassified
Otu00115	2405	Bacteria	Firmicutes	Clostridia	Clostridiales	Lachnospiraceae	Lachnospiraceae_unclassified	Lachnospiraceae_unclassified
Otu00116	2397	Bacteria	Firmicutes	Clostridia	Clostridiales	Lachnospiraceae	Lachnospiraceae_unclassified	Lachnospiraceae_unclassified
Otu00117	2394	Bacteria	Firmicutes	Clostridia	Clostridiales	Ruminococcaceae	Clostridium IV	leptum
Otu00118	2129	Bacteria	Bacteroidetes	Bacteroidia	Bacteroidales	Rikenellaceae	Alistipes	Alistipes_unclassified
Otu00119	2105	Bacteria	Firmicutes	Clostridia	Clostridiales	Lachnospiraceae	Lachnospiraceae_unclassified	Lachnospiraceae_unclassified
Otu00120	2089	Bacteria	Verrucomicrobia	Verrucomicrobiae	Verrucomicrobiales	Akkermansiaceae	Akkermansia	muciniphila
Otu00121	2085	Bacteria	Firmicutes	Clostridia	Clostridiales	Lachnospiraceae	Blautia	Blautia_unclassified
Otu00122	2050	Bacteria	Firmicutes	Clostridia	Clostridiales	Clostridiales_Incertae Sedis XIII	Clostridiales_Incertae Sedis XIII_unclassified	Clostridiales_Incertae Sedis XIII_unclassified
Otu00123	2048	Bacteria	Firmicutes	Clostridia	Clostridiales	Lachnospiraceae	Blautia	Blautia_unclassified
Otu00124	2017	Bacteria	Bacteroidetes	Bacteroidia	Bacteroidales	Bacteroidaceae	Bacteroides	caccae
Otu00125	1988	Bacteria	Firmicutes	Clostridia	Clostridiales	Ruminococcaceae	Ruminococcaceae_unclassified	Ruminococcaceae_unclassified
Otu00126	1933	Bacteria	Actinobacteria	Coriobacteriia	Eggerthellales	Eggerthellaceae	Slackia	isoflavoniconvertens
Otu00127	1894	Bacteria	Lentisphaerae	Lentisphaeria	Victivallales	Victivallaceae	Victivallis	vadensis
Otu00128	1764	Bacteria	Bacteroidetes	Bacteroidia	Bacteroidales	Bacteroidaceae	Bacteroides	nordii
Otu00129	1699	Bacteria	Firmicutes	Clostridia	Clostridiales	Ruminococcaceae	Ruminococcus	Ruminococcus_unclassified
Otu00130	1684	Bacteria	Firmicutes	Clostridia	Clostridiales	Ruminococcaceae	Ruminococcus	Ruminococcus_unclassified
Otu00131	1652	Bacteria	Firmicutes	Clostridia	Clostridiales	Ruminococcaceae	Colidextribacter	Colidextribacter_unclassified
Otu00132	1626	Bacteria	Firmicutes	Clostridia	Clostridiales	Clostridiales_unclassified	Clostridiales_unclassified	Clostridiales_unclassified
Otu00133	1585	Bacteria	Firmicutes	Clostridia	Clostridiales	Peptostreptococcaceae	Paraclostridium	bifermentans
Otu00134	1581	Bacteria	Firmicutes	Clostridia	Clostridiales	Lachnospiraceae	Lachnospiraceae_unclassified	Lachnospiraceae_unclassified
Otu00135	1567	Bacteria	Bacteria_unclassified	Bacteria_unclassified	Bacteria_unclassified	Bacteria_unclassified	Bacteria_unclassified	Bacteria_unclassified
Otu00136	1555	Bacteria	Bacteria_unclassified	Bacteria_unclassified	Bacteria_unclassified	Bacteria_unclassified	Bacteria_unclassified	Bacteria_unclassified
Otu00137	1553	Bacteria	Firmicutes	Clostridia	Clostridiales	Lachnospiraceae	Ruminococcus2	Ruminococcus2_unclassified
Otu00138	1408	Bacteria	Firmicutes	Clostridia	Clostridiales	Peptostreptococcaceae	Intestinibacter	bartlettii
Otu00139	1402	Bacteria	Firmicutes	Clostridia	Clostridiales	Lachnospiraceae	Lachnospiraceae_unclassified	Lachnospiraceae_unclassified
Otu00140	1391	Bacteria	Firmicutes	Clostridia	Clostridiales	Clostridiales_unclassified	Clostridiales_unclassified	Clostridiales_unclassified
Otu00141	1371	Bacteria	Bacteria_unclassified	Bacteria_unclassified	Bacteria_unclassified	Bacteria_unclassified	Bacteria_unclassified	Bacteria_unclassified
Otu00142	1365	Bacteria	Firmicutes	Clostridia	Clostridiales	Ruminococcaceae	Ruminococcaceae_unclassified	Ruminococcaceae_unclassified
Otu00143	1349	Bacteria	Firmicutes	Clostridia	Clostridiales	Ruminococcaceae	Lawsonibacter	Lawsonibacter_unclassified
Otu00144	1310	Bacteria	Bacteroidetes	Bacteroidia	Bacteroidales	Bacteroidaceae	Phocaeicola	vulgatus
Otu00145	1308	Bacteria	Firmicutes	Clostridia	Clostridiales	Ruminococcaceae	Faecalibacterium	prausnitzii
Otu00146	1300	Bacteria	Bacteroidetes	Bacteroidia	Bacteroidales	Rikenellaceae	Alistipes	Alistipes_unclassified
Otu00147	1296	Bacteria	Bacteroidetes	Bacteroidia	Bacteroidales	Bacteroidaceae	Phocaeicola	vulgatus
Otu00148	1292	Bacteria	Firmicutes	Bacilli	Lactobacillales	Streptococcaceae	Streptococcus	salivarius
Otu00149	1271	Bacteria	Firmicutes	Clostridia	Clostridiales	Lachnospiraceae	Lachnospiraceae_unclassified	Lachnospiraceae_unclassified
Otu00150	1258	Bacteria	Firmicutes	Clostridia	Clostridiales	Ruminococcaceae	Dysosmobacter	Dysosmobacter_unclassified
Otu00151	1256	Bacteria	Bacteroidetes	Bacteroidia	Bacteroidales	Bacteroidaceae	Phocaeicola	vulgatus
Otu00152	1233	Bacteria	Bacteroidetes	Bacteroidia	Bacteroidales	Bacteroidales_unclassified	Bacteroidales_unclassified	Bacteroidales_unclassified
Otu00153	1217	Bacteria	Firmicutes	Clostridia	Clostridiales	Lachnospiraceae	Anaerobutyricum	Anaerobutyricum_unclassified
Otu00154	1186	Bacteria	Firmicutes	Clostridia	Clostridiales	Clostridiales_unclassified	Clostridiales_unclassified	Clostridiales_unclassified
Otu00155	1184	Bacteria	Firmicutes	Clostridia	Clostridiales	Lachnospiraceae	Lachnospiraceae_unclassified	Lachnospiraceae_unclassified
Otu00156	1177	Bacteria	Firmicutes	Clostridia	Clostridiales	Ruminococcaceae	Ruminococcaceae_unclassified	Ruminococcaceae_unclassified
Otu00157	1176	Bacteria	Actinobacteria	Actinobacteria	Bifidobacteriales	Bifidobacteriaceae	Bifidobacterium	adolescentis
Otu00158	1165	Bacteria	Actinobacteria	Actinobacteria	Bifidobacteriales	Bifidobacteriaceae	Bifidobacterium	Bifidobacterium_unclassified
Otu00159	1164	Bacteria	Firmicutes	Clostridia	Clostridiales	Ruminococcaceae	Monoglobus	Monoglobus_unclassified
Otu00160	1141	Bacteria	Firmicutes	Clostridia	Clostridiales	Clostridiales_unclassified	Clostridiales_unclassified	Clostridiales_unclassified
Otu00161	1136	Bacteria	Firmicutes	Clostridia	Clostridiales	Lachnospiraceae	Lachnospiracea_incertae_sedis	Lachnospiracea_incertae_sedis_unclassified
Otu00162	1111	Bacteria	Firmicutes	Clostridia	Clostridiales	Lachnospiraceae	Lachnospiraceae_unclassified	Lachnospiraceae_unclassified
Otu00163	1104	Bacteria	Firmicutes	Clostridia	Clostridiales	Clostridiales_unclassified	Clostridiales_unclassified	Clostridiales_unclassified
Otu00164	1087	Bacteria	Bacteroidetes	Bacteroidia	Bacteroidales	Bacteroidaceae	Bacteroides	ovatus
Otu00165	1055	Bacteria	Bacteria_unclassified	Bacteria_unclassified	Bacteria_unclassified	Bacteria_unclassified	Bacteria_unclassified	Bacteria_unclassified
Otu00166	1008	Bacteria	Firmicutes	Clostridia	Clostridiales	Clostridiales_unclassified	Clostridiales_unclassified	Clostridiales_unclassified
Otu00167	996	Bacteria	Firmicutes	Erysipelotrichia	Erysipelotrichales	Erysipelotrichaceae	Erysipelotrichaceae_unclassified	Erysipelotrichaceae_unclassified
Otu00168	994	Archaea	Euryarchaeota	Thermoplasmata	Methanomassiliicoccales	Methanomassiliicoccaceae	Methanomassiliicoccus	Methanomassiliicoccus_unclassified
Otu00169	992	Bacteria	Firmicutes	Firmicutes_unclassified	Firmicutes_unclassified	Firmicutes_unclassified	Firmicutes_unclassified	Firmicutes_unclassified
Otu00170	986	Bacteria	Firmicutes	Clostridia	Clostridiales	Ruminococcaceae	Ruminococcus	Ruminococcus_unclassified
Otu00171	973	Bacteria	Bacteroidetes	Bacteroidia	Bacteroidales	Bacteroidaceae	Phocaeicola	vulgatus
Otu00172	970	Bacteria	Firmicutes	Clostridia	Clostridiales	Clostridiales_unclassified	Clostridiales_unclassified	Clostridiales_unclassified
Otu00173	941	Bacteria	Firmicutes	Firmicutes_unclassified	Firmicutes_unclassified	Firmicutes_unclassified	Firmicutes_unclassified	Firmicutes_unclassified
Otu00174	936	Bacteria	Firmicutes	Clostridia	Clostridiales	Clostridiales_unclassified	Clostridiales_unclassified	Clostridiales_unclassified
Otu00175	933	Bacteria	Firmicutes	Clostridia	Clostridiales	Lachnospiraceae	Lachnospiraceae_unclassified	Lachnospiraceae_unclassified
Otu00176	930	Bacteria	Actinobacteria	Coriobacteriia	Eggerthellales	Eggerthellaceae	Gordonibacter	urolithinfaciens
Otu00177	922	Bacteria	Firmicutes	Clostridia	Clostridiales	Ruminococcaceae	Colidextribacter	Colidextribacter_unclassified
Otu00178	911	Bacteria	Firmicutes	Firmicutes_unclassified	Firmicutes_unclassified	Firmicutes_unclassified	Firmicutes_unclassified	Firmicutes_unclassified
Otu00179	901	Bacteria	Firmicutes	Clostridia	Clostridiales	Ruminococcaceae	Ruminococcaceae_unclassified	Ruminococcaceae_unclassified
Otu00180	866	Bacteria	Bacteria_unclassified	Bacteria_unclassified	Bacteria_unclassified	Bacteria_unclassified	Bacteria_unclassified	Bacteria_unclassified
Otu00181	855	Bacteria	Bacteria_unclassified	Bacteria_unclassified	Bacteria_unclassified	Bacteria_unclassified	Bacteria_unclassified	Bacteria_unclassified
Otu00182	841	Bacteria	Firmicutes	Clostridia	Clostridiales	Lachnospiraceae	Lachnospiraceae_unclassified	Lachnospiraceae_unclassified
Otu00183	812	Bacteria	Firmicutes	Clostridia	Clostridiales	Ruminococcaceae	Ruminococcaceae_unclassified	Ruminococcaceae_unclassified
Otu00184	809	Bacteria	Firmicutes	Firmicutes_unclassified	Firmicutes_unclassified	Firmicutes_unclassified	Firmicutes_unclassified	Firmicutes_unclassified
Otu00185	778	Bacteria	Firmicutes	Clostridia	Clostridiales	Lachnospiraceae	Blautia	Blautia_unclassified
Otu00186	777	Bacteria	Firmicutes	Clostridia	Clostridiales	Clostridiales_Incertae Sedis XIII	Ihubacter	Ihubacter_unclassified
Otu00187	773	Bacteria	Firmicutes	Clostridia	Clostridiales	Lachnospiraceae	Roseburia	inulinivorans
Otu00188	767	Bacteria	Firmicutes	Clostridia	Clostridiales	Ruminococcaceae	Flintibacter	Flintibacter_unclassified
Otu00189	766	Bacteria	Firmicutes	Clostridia	Clostridiales	Ruminococcaceae	Ruminococcaceae_unclassified	Ruminococcaceae_unclassified
Otu00190	755	Bacteria	Firmicutes	Clostridia	Clostridiales	Clostridiales_unclassified	Clostridiales_unclassified	Clostridiales_unclassified
Otu00191	754	Bacteria	Bacteroidetes	Bacteroidia	Bacteroidales	Bacteroidaceae	Phocaeicola	vulgatus
Otu00192	752	Bacteria	Firmicutes	Clostridia	Clostridiales	Ruminococcaceae	Ruminococcaceae_unclassified	Ruminococcaceae_unclassified
Otu00193	745	Bacteria	Bacteria_unclassified	Bacteria_unclassified	Bacteria_unclassified	Bacteria_unclassified	Bacteria_unclassified	Bacteria_unclassified
Otu00194	707	Bacteria	Firmicutes	Clostridia	Clostridiales	Ruminococcaceae	Ruminococcaceae_unclassified	Ruminococcaceae_unclassified
Otu00195	697	Bacteria	Firmicutes	Erysipelotrichia	Erysipelotrichales	Erysipelotrichaceae	Holdemania	filiformis
Otu00196	680	Bacteria	Firmicutes	Firmicutes_unclassified	Firmicutes_unclassified	Firmicutes_unclassified	Firmicutes_unclassified	Firmicutes_unclassified
Otu00197	669	Bacteria	Bacteroidetes	Bacteroidia	Bacteroidales	Bacteroidaceae	Phocaeicola	vulgatus
Otu00198	661	Bacteria	Firmicutes	Firmicutes_unclassified	Firmicutes_unclassified	Firmicutes_unclassified	Firmicutes_unclassified	Firmicutes_unclassified
Otu00199	653	Bacteria	Firmicutes	Clostridia	Clostridiales	Clostridiaceae 1	Clostridium sensu stricto	Clostridium sensu stricto_unclassified
Otu00200	653	Bacteria	Firmicutes	Clostridia	Clostridiales	Ruminococcaceae	Phocea	Phocea_unclassified
Otu00201	648	Bacteria	Firmicutes	Clostridia	Clostridiales	Lachnospiraceae	Clostridium XlVa	scindens
Otu00202	645	Bacteria	Firmicutes	Clostridia	Clostridiales	Lachnospiraceae	Enterocloster	asparagiforme
Otu00203	641	Bacteria	Firmicutes	Clostridia	Clostridiales	Lachnospiraceae	Lachnospiraceae_unclassified	Lachnospiraceae_unclassified
Otu00204	629	Bacteria	Firmicutes	Clostridia	Clostridiales	Clostridiales_unclassified	Clostridiales_unclassified	Clostridiales_unclassified
Otu00205	628	Bacteria	Bacteria_unclassified	Bacteria_unclassified	Bacteria_unclassified	Bacteria_unclassified	Bacteria_unclassified	Bacteria_unclassified
Otu00206	619	Bacteria	Firmicutes	Clostridia	Clostridiales	Lachnospiraceae	Lachnospiraceae_unclassified	Lachnospiraceae_unclassified
Otu00207	609	Bacteria	Firmicutes	Clostridia	Clostridiales	Lachnospiraceae	Faecalicatena	Faecalicatena_unclassified
Otu00208	606	Bacteria	Firmicutes	Erysipelotrichia	Erysipelotrichales	Erysipelotrichaceae	Holdemania	massiliensis AP2
Otu00209	604	Bacteria	Firmicutes	Clostridia	Clostridiales	Clostridiales_unclassified	Clostridiales_unclassified	Clostridiales_unclassified
Otu00210	583	Bacteria	Firmicutes	Clostridia	Clostridiales	Lachnospiraceae	Lachnospiracea_incertae_sedis	Lachnospiracea_incertae_sedis_unclassified
Otu00211	581	Bacteria	Bacteroidetes	Bacteroidia	Bacteroidales	Bacteroidaceae	Bacteroides	Bacteroides_unclassified
Otu00212	563	Bacteria	Firmicutes	Clostridia	Clostridiales	Lachnospiraceae	Blautia	Blautia_unclassified
Otu00213	555	Bacteria	Firmicutes	Clostridia	Clostridiales	Ruminococcaceae	Ruminococcaceae_unclassified	Ruminococcaceae_unclassified
Otu00214	551	Bacteria	Actinobacteria	Coriobacteriia	Eggerthellales	Eggerthellaceae	Raoultibacter	Raoultibacter_unclassified
Otu00215	538	Bacteria	Bacteroidetes	Bacteroidia	Bacteroidales	Bacteroidaceae	Bacteroides	Bacteroides_unclassified
Otu00216	536	Bacteria	Firmicutes	Clostridia	Clostridiales	Ruminococcaceae	Faecalibacterium	prausnitzii
Otu00217	532	Bacteria	Firmicutes	Clostridia	Clostridiales	Lachnospiraceae	Blautia	hydrogenotrophica
Otu00218	530	Bacteria	Firmicutes	Clostridia	Clostridiales	Peptostreptococcaceae	Terrisporobacter	mayombei
Otu00219	505	Bacteria	Firmicutes	Clostridia	Clostridiales	Clostridiales_unclassified	Clostridiales_unclassified	Clostridiales_unclassified
Otu00220	499	Bacteria	Firmicutes	Firmicutes_unclassified	Firmicutes_unclassified	Firmicutes_unclassified	Firmicutes_unclassified	Firmicutes_unclassified
Otu00221	495	Bacteria	Firmicutes	Clostridia	Clostridiales	Ruminococcaceae	Ruminococcaceae_unclassified	Ruminococcaceae_unclassified
Otu00222	494	Bacteria	Firmicutes	Clostridia	Clostridiales	Lachnospiraceae	Blautia	Blautia_unclassified
Otu00223	488	Bacteria	Firmicutes	Clostridia	Clostridia_unclassified	Clostridia_unclassified	Clostridia_unclassified	Clostridia_unclassified
Otu00224	480	Bacteria	Firmicutes	Bacilli	Lactobacillales	Streptococcaceae	Streptococcus	Streptococcus_unclassified
Otu00225	476	Bacteria	Bacteroidetes	Bacteroidia	Bacteroidales	Bacteroidaceae	Bacteroides	uniformis
Otu00226	464	Bacteria	Firmicutes	Firmicutes_unclassified	Firmicutes_unclassified	Firmicutes_unclassified	Firmicutes_unclassified	Firmicutes_unclassified
Otu00227	455	Bacteria	Firmicutes	Clostridia	Clostridiales	Clostridiales_unclassified	Clostridiales_unclassified	Clostridiales_unclassified
Otu00228	446	Bacteria	Bacteroidetes	Bacteroidia	Bacteroidales	Prevotellaceae	Massiliprevotella	Massiliprevotella_unclassified
Otu00229	437	Bacteria	Bacteroidetes	Bacteroidia	Bacteroidales	Bacteroidaceae	Phocaeicola	vulgatus
Otu00230	424	Bacteria	Firmicutes	Clostridia	Clostridiales	Ruminococcaceae	Oscillibacter	Oscillibacter_unclassified
Otu00231	424	Bacteria	Bacteroidetes	Bacteroidia	Bacteroidales	Bacteroidaceae	Bacteroides	Bacteroides_unclassified
Otu00232	422	Bacteria	Bacteroidetes	Bacteroidia	Bacteroidales	Bacteroidaceae	Bacteroides	Bacteroides_unclassified
Otu00233	421	Bacteria	Firmicutes	Clostridia	Clostridiales	Clostridiales_unclassified	Clostridiales_unclassified	Clostridiales_unclassified
Otu00234	421	Bacteria	Proteobacteria	Betaproteobacteria	Burkholderiales	Oxalobacteraceae	Oxalobacteraceae_unclassified	Oxalobacteraceae_unclassified
Otu00235	412	Bacteria	Firmicutes	Clostridia	Clostridiales	Clostridiales_unclassified	Clostridiales_unclassified	Clostridiales_unclassified
Otu00236	410	Bacteria	Bacteroidetes	Bacteroidia	Bacteroidales	Rikenellaceae	Alistipes	marseilloanorexicus AP11
Otu00237	409	Bacteria	Firmicutes	Clostridia	Clostridiales	Ruminococcaceae	Intestinimonas	butyriciproducens
Otu00238	408	Bacteria	Firmicutes	Clostridia	Clostridiales	Clostridiales_unclassified	Clostridiales_unclassified	Clostridiales_unclassified
Otu00239	403	Bacteria	Firmicutes	Clostridia	Clostridiales	Lachnospiraceae	Lachnospiraceae_unclassified	Lachnospiraceae_unclassified
Otu00240	403	Bacteria	Firmicutes	Clostridia	Clostridiales	Lachnospiraceae	Anaerotignum	Anaerotignum_unclassified
Otu00241	402	Bacteria	Firmicutes	Clostridia	Clostridiales	Lachnospiraceae	Lachnospiraceae_unclassified	Lachnospiraceae_unclassified
Otu00242	399	Bacteria	Firmicutes	Clostridia	Clostridiales	Ruminococcaceae	Anaerotruncus	Anaerotruncus_unclassified
Otu00243	397	Bacteria	Firmicutes	Clostridia	Clostridiales	Ruminococcaceae	Ruminococcaceae_unclassified	Ruminococcaceae_unclassified
Otu00244	396	Bacteria	Bacteroidetes	Bacteroidia	Bacteroidales	Bacteroidaceae	Phocaeicola	vulgatus
Otu00245	389	Bacteria	Firmicutes	Clostridia	Clostridiales	Clostridiales_unclassified	Clostridiales_unclassified	Clostridiales_unclassified
Otu00246	379	Bacteria	Bacteria_unclassified	Bacteria_unclassified	Bacteria_unclassified	Bacteria_unclassified	Bacteria_unclassified	Bacteria_unclassified
Otu00247	378	Bacteria	Firmicutes	Bacilli	Lactobacillales	Streptococcaceae	Streptococcus	mutans
Otu00248	377	Bacteria	Firmicutes	Clostridia	Clostridiales	Lachnospiraceae	Anaerotignum	lactatifermentans
Otu00249	375	Bacteria	Firmicutes	Firmicutes_unclassified	Firmicutes_unclassified	Firmicutes_unclassified	Firmicutes_unclassified	Firmicutes_unclassified
Otu00250	372	Bacteria	Firmicutes	Clostridia	Clostridiales	Ruminococcaceae	Ruminococcaceae_unclassified	Ruminococcaceae_unclassified
Otu00251	358	Bacteria	Bacteroidetes	Bacteroidia	Bacteroidales	Bacteroidaceae	Bacteroides	uniformis
Otu00252	357	Bacteria	Bacteroidetes	Bacteroidia	Bacteroidales	Bacteroidales_unclassified	Bacteroidales_unclassified	Bacteroidales_unclassified
Otu00253	356	Bacteria	Bacteria_unclassified	Bacteria_unclassified	Bacteria_unclassified	Bacteria_unclassified	Bacteria_unclassified	Bacteria_unclassified
Otu00254	351	Bacteria	Firmicutes	Clostridia	Clostridiales	Lachnospiraceae	Lachnospiraceae_unclassified	Lachnospiraceae_unclassified
Otu00255	350	Bacteria	Firmicutes	Firmicutes_unclassified	Firmicutes_unclassified	Firmicutes_unclassified	Firmicutes_unclassified	Firmicutes_unclassified
Otu00256	350	Bacteria	Bacteria_unclassified	Bacteria_unclassified	Bacteria_unclassified	Bacteria_unclassified	Bacteria_unclassified	Bacteria_unclassified
Otu00257	349	Bacteria	Firmicutes	Erysipelotrichia	Erysipelotrichales	Erysipelotrichaceae	Erysipelotrichaceae_unclassified	Erysipelotrichaceae_unclassified
Otu00258	346	Bacteria	Firmicutes	Clostridia	Clostridiales	Ruminococcaceae	Ruminococcaceae_unclassified	Ruminococcaceae_unclassified
Otu00259	345	Bacteria	Firmicutes	Clostridia	Clostridiales	Lachnospiraceae	Lachnospiraceae_unclassified	Lachnospiraceae_unclassified
Otu00260	339	Bacteria	Firmicutes	Clostridia	Clostridiales	Lachnospiraceae	Fusicatenibacter	saccharivorans
Otu00261	338	Bacteria	Firmicutes	Bacilli	Bacillales	Bacillaceae 1	Parageobacillus	Parageobacillus_unclassified
Otu00262	337	Bacteria	Firmicutes	Firmicutes_unclassified	Firmicutes_unclassified	Firmicutes_unclassified	Firmicutes_unclassified	Firmicutes_unclassified
Otu00263	336	Bacteria	Firmicutes	Clostridia	Clostridiales	Clostridiales_Incertae Sedis XIII	Bacilliculturomica	Bacilliculturomica_unclassified
Otu00264	334	Bacteria	Proteobacteria	Gammaproteobacteria	Enterobacterales	Enterobacteriaceae	Enterobacteriaceae_unclassified	Enterobacteriaceae_unclassified
Otu00265	334	Bacteria	Actinobacteria	Coriobacteriia	Eggerthellales	Eggerthellaceae	Gordonibacter	pamelaeae
Otu00266	334	Bacteria	Firmicutes	Clostridia	Clostridiales	Clostridiales_unclassified	Clostridiales_unclassified	Clostridiales_unclassified
Otu00267	333	Bacteria	Firmicutes	Clostridia	Clostridiales	Ruminococcaceae	Intestinimonas	Intestinimonas_unclassified
Otu00268	331	Bacteria	Bacteroidetes	Bacteroidia	Bacteroidales	Bacteroidaceae	Bacteroides	Bacteroides_unclassified
Otu00269	329	Bacteria	Firmicutes	Clostridia	Clostridiales	Lachnospiraceae	Lachnospiraceae_unclassified	Lachnospiraceae_unclassified
Otu00270	327	Bacteria	Firmicutes	Clostridia	Clostridiales	Clostridiales_unclassified	Clostridiales_unclassified	Clostridiales_unclassified
Otu00271	327	Bacteria	Firmicutes	Clostridia	Clostridiales	Ruminococcaceae	Ruminococcaceae_unclassified	Ruminococcaceae_unclassified
Otu00272	325	Bacteria	Firmicutes	Clostridia	Clostridiales	Lachnospiraceae	Lachnospiraceae_unclassified	Lachnospiraceae_unclassified
Otu00273	324	Bacteria	Firmicutes	Clostridia	Clostridiales	Ruminococcaceae	Ruthenibacterium	Ruthenibacterium_unclassified
Otu00274	323	Bacteria	Firmicutes	Clostridia	Clostridiales	Lachnospiraceae	Lachnospiraceae_unclassified	Lachnospiraceae_unclassified
Otu00275	323	Bacteria	Firmicutes	Clostridia	Clostridiales	Clostridiales_unclassified	Clostridiales_unclassified	Clostridiales_unclassified
Otu00276	322	Bacteria	Bacteria_unclassified	Bacteria_unclassified	Bacteria_unclassified	Bacteria_unclassified	Bacteria_unclassified	Bacteria_unclassified
Otu00277	321	Bacteria	Firmicutes	Clostridia	Clostridiales	Ruminococcaceae	Subdoligranulum	variabile
Otu00278	320	Bacteria	Firmicutes	Clostridia	Clostridiales	Ruminococcaceae	Faecalibacterium	prausnitzii
Otu00279	315	Bacteria	Firmicutes	Clostridia	Clostridiales	Lachnospiraceae	Dorea	longicatena
Otu00280	309	Bacteria	Firmicutes	Clostridia	Clostridiales	Clostridiales_unclassified	Clostridiales_unclassified	Clostridiales_unclassified
Otu00281	309	Bacteria	Bacteroidetes	Bacteroidia	Bacteroidales	Bacteroidaceae	Bacteroides	intestinalis
Otu00282	303	Bacteria	Bacteria_unclassified	Bacteria_unclassified	Bacteria_unclassified	Bacteria_unclassified	Bacteria_unclassified	Bacteria_unclassified
Otu00283	302	Bacteria	Bacteria_unclassified	Bacteria_unclassified	Bacteria_unclassified	Bacteria_unclassified	Bacteria_unclassified	Bacteria_unclassified
Otu00284	301	Bacteria	Actinobacteria	Actinobacteria	Bifidobacteriales	Bifidobacteriaceae	Bifidobacterium	Bifidobacterium_unclassified
Otu00285	299	Bacteria	Firmicutes	Clostridia	Clostridiales	Lachnospiraceae	Lachnospiraceae_unclassified	Lachnospiraceae_unclassified
Otu00286	292	Bacteria	Bacteroidetes	Bacteroidia	Bacteroidales	Bacteroidaceae	Bacteroides	Bacteroides_unclassified
Otu00287	291	Bacteria	Firmicutes	Firmicutes_unclassified	Firmicutes_unclassified	Firmicutes_unclassified	Firmicutes_unclassified	Firmicutes_unclassified
Otu00288	290	Bacteria	Firmicutes	Clostridia	Clostridiales	Lachnospiraceae	Roseburia	intestinalis
Otu00289	285	Bacteria	Firmicutes	Clostridia	Clostridiales	Clostridiales_unclassified	Clostridiales_unclassified	Clostridiales_unclassified
Otu00290	284	Bacteria	Firmicutes	Clostridia	Clostridiales	Ruminococcaceae	Faecalibacterium	prausnitzii
Otu00291	278	Bacteria	Firmicutes	Clostridia	Clostridiales	Lachnospiraceae	Anaerostipes	hadrus
Otu00292	278	Bacteria	Firmicutes	Clostridia	Clostridiales	Ruminococcaceae	Faecalibacterium	prausnitzii
Otu00293	277	Bacteria	Firmicutes	Clostridia	Clostridiales	Ruminococcaceae	Ruminococcaceae_unclassified	Ruminococcaceae_unclassified
Otu00294	274	Bacteria	Firmicutes	Clostridia	Clostridiales	Ruminococcaceae	Ruminococcaceae_unclassified	Ruminococcaceae_unclassified
Otu00295	274	Bacteria	Firmicutes	Clostridia	Clostridiales	Clostridiales_unclassified	Clostridiales_unclassified	Clostridiales_unclassified
Otu00296	273	Bacteria	Firmicutes	Clostridia	Clostridiales	Ruminococcaceae	Oscillibacter	ruminantium
Otu00297	271	Bacteria	Firmicutes	Clostridia	Clostridiales	Lachnospiraceae	Fusicatenibacter	saccharivorans
Otu00298	270	Bacteria	Firmicutes	Clostridia	Clostridiales	Clostridiales_unclassified	Clostridiales_unclassified	Clostridiales_unclassified
Otu00299	268	Bacteria	Actinobacteria	Actinobacteria	Bifidobacteriales	Bifidobacteriaceae	Bifidobacterium	adolescentis
Otu00300	267	Bacteria	Bacteroidetes	Bacteroidia	Bacteroidales	Bacteroidaceae	Phocaeicola	vulgatus
Otu00301	264	Bacteria	Actinobacteria	Coriobacteriia	Coriobacteriales	Coriobacteriaceae	Collinsella	stercoris
Otu00302	264	Bacteria	Firmicutes	Clostridia	Clostridiales	Ruminococcaceae	Ruminococcaceae_unclassified	Ruminococcaceae_unclassified
Otu00303	263	Bacteria	Firmicutes	Clostridia	Clostridiales	Lachnospiraceae	Blautia	Blautia_unclassified
Otu00304	254	Bacteria	Firmicutes	Clostridia	Clostridiales	Clostridiales_unclassified	Clostridiales_unclassified	Clostridiales_unclassified
Otu00305	251	Bacteria	Bacteroidetes	Bacteroidia	Bacteroidales	Bacteroidaceae	Bacteroides	uniformis
Otu00306	246	Bacteria	Actinobacteria	Actinobacteria	Bifidobacteriales	Bifidobacteriaceae	Bifidobacterium	Bifidobacterium_unclassified
Otu00307	245	Bacteria	Bacteroidetes	Bacteroidia	Bacteroidales	Bacteroidaceae	Bacteroides	Bacteroides_unclassified
Otu00308	242	Bacteria	Lentisphaerae	Lentisphaeria	Victivallales	Victivallaceae	Victivallis	vadensis
Otu00309	240	Bacteria	Bacteroidetes	Bacteroidia	Bacteroidales	Bacteroidaceae	Bacteroides	Bacteroides_unclassified
Otu00310	239	Bacteria	Firmicutes	Clostridia	Clostridiales	Ruminococcaceae	Faecalibacterium	prausnitzii
Otu00311	237	Bacteria	Firmicutes	Clostridia	Clostridiales	Lachnospiraceae	Lachnospiraceae_unclassified	Lachnospiraceae_unclassified
Otu00312	236	Bacteria	Actinobacteria	Coriobacteriia	Coriobacteriales	Coriobacteriaceae	Collinsella	aerofaciens
Otu00313	235	Bacteria	Proteobacteria	Betaproteobacteria	Burkholderiales	Sutterellaceae	Parasutterella	excrementihominis
Otu00314	235	Bacteria	Firmicutes	Clostridia	Clostridiales	Ruminococcaceae	Ruminococcus	bromii
Otu00315	232	Bacteria	Firmicutes	Clostridia	Clostridiales	Lachnospiraceae	Lachnospiraceae_unclassified	Lachnospiraceae_unclassified
Otu00316	228	Bacteria	Firmicutes	Erysipelotrichia	Erysipelotrichales	Erysipelatoclostridiaceae	Erysipelatoclostridium	ramosum
Otu00317	228	Bacteria	Firmicutes	Clostridia	Clostridiales	Lachnospiraceae	Anaerobutyricum	Anaerobutyricum_unclassified
Otu00318	225	Archaea	Euryarchaeota	Methanobacteria	Methanobacteriales	Methanobacteriaceae	Methanobrevibacter	Methanobrevibacter_unclassified
Otu00319	221	Bacteria	Proteobacteria	Betaproteobacteria	Burkholderiales	Sutterellaceae	Sutterella	wadsworthensis
Otu00320	220	Bacteria	Firmicutes	Firmicutes_unclassified	Firmicutes_unclassified	Firmicutes_unclassified	Firmicutes_unclassified	Firmicutes_unclassified
Otu00321	220	Bacteria	Bacteroidetes	Bacteroidia	Bacteroidales	Porphyromonadaceae	Parabacteroides	merdae
Otu00322	219	Bacteria	Bacteroidetes	Bacteroidia	Bacteroidales	Bacteroidaceae	Bacteroides	Bacteroides_unclassified
Otu00323	215	Bacteria	Firmicutes	Clostridia	Clostridiales	Clostridiales_unclassified	Clostridiales_unclassified	Clostridiales_unclassified
Otu00324	213	Bacteria	Proteobacteria	Betaproteobacteria	Burkholderiales	Sutterellaceae	Parasutterella	excrementihominis
Otu00325	212	Bacteria	Firmicutes	Clostridia	Clostridiales	Ruminococcaceae	Ruminococcaceae_unclassified	Ruminococcaceae_unclassified
Otu00326	212	Bacteria	Firmicutes	Negativicutes	Veillonellales	Veillonellaceae	Veillonella	dispar
Otu00327	212	Bacteria	Firmicutes	Clostridia	Clostridiales	Lachnospiraceae	Lachnospiraceae_unclassified	Lachnospiraceae_unclassified
Otu00328	205	Bacteria	Firmicutes	Bacilli	Bacillales	Bacillaceae 1	Bacillus	cereus
Otu00329	204	Bacteria	Firmicutes	Clostridia	Clostridiales	Lachnospiraceae	Blautia	obeum
Otu00330	204	Bacteria	Firmicutes	Clostridia	Clostridiales	Clostridiales_unclassified	Clostridiales_unclassified	Clostridiales_unclassified
Otu00331	202	Bacteria	Bacteroidetes	Bacteroidia	Bacteroidales	Bacteroidaceae	Bacteroides	ovatus
Otu00332	196	Bacteria	Firmicutes	Clostridia	Clostridiales	Lachnospiraceae	Ruminococcus2	Ruminococcus2_unclassified
Otu00333	195	Bacteria	Firmicutes	Clostridia	Clostridiales	Ruminococcaceae	Ruminococcaceae_unclassified	Ruminococcaceae_unclassified
Otu00334	194	Bacteria	Firmicutes	Clostridia	Clostridiales	Ruminococcaceae	Ruminococcaceae_unclassified	Ruminococcaceae_unclassified
Otu00335	191	Bacteria	Actinobacteria	Actinobacteria	Bifidobacteriales	Bifidobacteriaceae	Bifidobacterium	Bifidobacterium_unclassified
Otu00336	190	Bacteria	Firmicutes	Clostridia	Clostridiales	Lachnospiraceae	Lachnospiraceae_unclassified	Lachnospiraceae_unclassified
Otu00337	189	Bacteria	Firmicutes	Clostridia	Clostridiales	Ruminococcaceae	Oscillibacter	Oscillibacter_unclassified
Otu00338	189	Bacteria	Firmicutes	Clostridia	Clostridiales	Lachnospiraceae	Lachnospiraceae_unclassified	Lachnospiraceae_unclassified
Otu00339	188	Bacteria	Bacteria_unclassified	Bacteria_unclassified	Bacteria_unclassified	Bacteria_unclassified	Bacteria_unclassified	Bacteria_unclassified
Otu00340	188	Bacteria	Bacteroidetes	Bacteroidia	Bacteroidales	Bacteroidaceae	Bacteroides	Bacteroides_unclassified
Otu00341	188	Bacteria	Firmicutes	Clostridia	Clostridiales	Lachnospiraceae	Blautia	Blautia_unclassified
Otu00342	187	Bacteria	Firmicutes	Erysipelotrichia	Erysipelotrichales	Erysipelotrichaceae	Longicatena	Longicatena_unclassified
Otu00343	187	Bacteria	Firmicutes	Clostridia	Clostridiales	Lachnospiraceae	Dorea	longicatena
Otu00344	183	Bacteria	Firmicutes	Negativicutes	Acidaminococcales	Acidaminococcaceae	Phascolarctobacterium	faecium
Otu00345	183	Bacteria	Firmicutes	Firmicutes_unclassified	Firmicutes_unclassified	Firmicutes_unclassified	Firmicutes_unclassified	Firmicutes_unclassified
Otu00346	183	Bacteria	Firmicutes	Clostridia	Clostridiales	Lachnospiraceae	Agathobacter	Agathobacter_unclassified
Otu00347	182	Bacteria	Firmicutes	Clostridia	Clostridiales	Ruminococcaceae	Ruminococcaceae_unclassified	Ruminococcaceae_unclassified
Otu00348	180	Bacteria	Proteobacteria	Gammaproteobacteria	Pasteurellales	Pasteurellaceae	Haemophilus	parainfluenzae
Otu00349	179	Bacteria	Firmicutes	Clostridia	Clostridiales	Ruminococcaceae	Ruminococcaceae_unclassified	Ruminococcaceae_unclassified
Otu00350	179	Bacteria	Firmicutes	Clostridia	Clostridiales	Clostridiales_unclassified	Clostridiales_unclassified	Clostridiales_unclassified
Otu00351	179	Bacteria	Firmicutes	Clostridia	Clostridiales	Clostridiales_unclassified	Clostridiales_unclassified	Clostridiales_unclassified
Otu00352	178	Bacteria	Firmicutes	Clostridia	Clostridiales	Lachnospiraceae	Anaerobutyricum	Anaerobutyricum_unclassified
Otu00353	178	Bacteria	Firmicutes	Clostridia	Clostridiales	Clostridiales_unclassified	Clostridiales_unclassified	Clostridiales_unclassified
Otu00354	175	Bacteria	Firmicutes	Clostridia	Clostridiales	Ruminococcaceae	Ruminococcaceae_unclassified	Ruminococcaceae_unclassified
Otu00355	175	Bacteria	Firmicutes	Clostridia	Clostridiales	Lachnospiraceae	Fusicatenibacter	saccharivorans
Otu00356	175	Bacteria	Actinobacteria	Coriobacteriia	Eggerthellales	Eggerthellaceae	Slackia	isoflavoniconvertens
Otu00357	174	Bacteria	Firmicutes	Erysipelotrichia	Erysipelotrichales	Erysipelotrichaceae	Massilimicrobiota	Massilimicrobiota_unclassified
Otu00358	174	Bacteria	Firmicutes	Clostridia	Clostridiales	Ruminococcaceae	Ruminococcaceae_unclassified	Ruminococcaceae_unclassified
Otu00359	173	Bacteria	Firmicutes	Clostridia	Clostridiales	Ruminococcaceae	Ruminococcaceae_unclassified	Ruminococcaceae_unclassified
Otu00360	173	Bacteria	Firmicutes	Clostridia	Clostridiales	Lachnospiraceae	Fusicatenibacter	saccharivorans
Otu00361	172	Bacteria	Firmicutes	Clostridia	Clostridiales	Clostridiales_unclassified	Clostridiales_unclassified	Clostridiales_unclassified
Otu00362	172	Bacteria	Firmicutes	Clostridia	Clostridiales	Ruminococcaceae	Ruminococcus	bromii
Otu00363	171	Bacteria	Firmicutes	Clostridia	Clostridiales	Clostridiales_unclassified	Clostridiales_unclassified	Clostridiales_unclassified
Otu00364	168	Bacteria	Bacteroidetes	Bacteroidia	Bacteroidales	Bacteroidaceae	Phocaeicola	vulgatus
Otu00365	168	Bacteria	Firmicutes	Clostridia	Clostridiales	Lachnospiraceae	Lachnospiraceae_unclassified	Lachnospiraceae_unclassified
Otu00366	166	Bacteria	Bacteroidetes	Bacteroidia	Bacteroidales	Bacteroidaceae	Phocaeicola	vulgatus
Otu00367	165	Bacteria	Actinobacteria	Actinobacteria	Bifidobacteriales	Bifidobacteriaceae	Bifidobacterium	Bifidobacterium_unclassified
Otu00368	164	Bacteria	Bacteria_unclassified	Bacteria_unclassified	Bacteria_unclassified	Bacteria_unclassified	Bacteria_unclassified	Bacteria_unclassified
Otu00369	164	Bacteria	Firmicutes	Clostridia	Clostridiales	Clostridiales_unclassified	Clostridiales_unclassified	Clostridiales_unclassified
Otu00370	162	Bacteria	Bacteroidetes	Bacteroidia	Bacteroidales	Bacteroidaceae	Phocaeicola	vulgatus
Otu00371	161	Bacteria	Bacteroidetes	Bacteroidia	Bacteroidales	Bacteroidaceae	Bacteroides	Bacteroides_unclassified
Otu00372	160	Bacteria	Firmicutes	Clostridia	Clostridiales	Lachnospiraceae	Dorea	longicatena
Otu00373	160	Bacteria	Firmicutes	Clostridia	Clostridiales	Lachnospiraceae	Fusicatenibacter	saccharivorans
Otu00374	160	Bacteria	Firmicutes	Clostridia	Clostridiales	Lachnospiraceae	Lachnospiraceae_unclassified	Lachnospiraceae_unclassified
Otu00375	159	Bacteria	Firmicutes	Clostridia	Clostridiales	Lachnospiraceae	Lachnospiraceae_unclassified	Lachnospiraceae_unclassified
Otu00376	159	Bacteria	Bacteroidetes	Bacteroidia	Bacteroidales	Bacteroidaceae	Bacteroidaceae_unclassified	Bacteroidaceae_unclassified
Otu00377	157	Bacteria	Firmicutes	Firmicutes_unclassified	Firmicutes_unclassified	Firmicutes_unclassified	Firmicutes_unclassified	Firmicutes_unclassified
Otu00378	157	Bacteria	Bacteroidetes	Bacteroidia	Bacteroidales	Bacteroidaceae	Bacteroides	Bacteroides_unclassified
Otu00379	157	Bacteria	Firmicutes	Clostridia	Clostridiales	Ruminococcaceae	Dysosmobacter	Dysosmobacter_unclassified
Otu00380	155	Bacteria	Firmicutes	Clostridia	Clostridiales	Lachnospiraceae	Lachnospiraceae_unclassified	Lachnospiraceae_unclassified
Otu00381	155	Bacteria	Actinobacteria	Actinobacteria	Bifidobacteriales	Bifidobacteriaceae	Bifidobacterium	Bifidobacterium_unclassified
Otu00382	154	Bacteria	Firmicutes	Clostridia	Clostridia_unclassified	Clostridia_unclassified	Clostridia_unclassified	Clostridia_unclassified
Otu00383	154	Bacteria	Firmicutes	Clostridia	Clostridiales	Clostridiales_unclassified	Clostridiales_unclassified	Clostridiales_unclassified
Otu00384	154	Bacteria	Firmicutes	Clostridia	Clostridiales	Lachnospiraceae	Blautia	Blautia_unclassified
Otu00385	154	Bacteria	Bacteroidetes	Bacteroidia	Bacteroidales	Bacteroidaceae	Bacteroides	thetaiotaomicron VPI-5482
Otu00386	154	Bacteria	Firmicutes	Clostridia	Clostridiales	Ruminococcaceae	Anaerotruncus	colihominis
Otu00387	153	Bacteria	Firmicutes	Clostridia	Clostridiales	Lachnospiraceae	Blautia	wexlerae
Otu00388	152	Bacteria	Firmicutes	Clostridia	Clostridiales	Ruminococcaceae	Ruminococcaceae_unclassified	Ruminococcaceae_unclassified
Otu00389	151	Bacteria	Bacteria_unclassified	Bacteria_unclassified	Bacteria_unclassified	Bacteria_unclassified	Bacteria_unclassified	Bacteria_unclassified
Otu00390	149	Bacteria	Bacteroidetes	Bacteroidia	Bacteroidales	Bacteroidaceae	Phocaeicola	vulgatus
Otu00391	149	Bacteria	Firmicutes	Clostridia	Clostridiales	Clostridiales_unclassified	Clostridiales_unclassified	Clostridiales_unclassified
Otu00392	149	Bacteria	Firmicutes	Firmicutes_unclassified	Firmicutes_unclassified	Firmicutes_unclassified	Firmicutes_unclassified	Firmicutes_unclassified
Otu00393	148	Bacteria	Firmicutes	Clostridia	Clostridiales	Clostridiales_unclassified	Clostridiales_unclassified	Clostridiales_unclassified
Otu00394	148	Bacteria	Bacteroidetes	Bacteroidia	Bacteroidales	Bacteroidaceae	Bacteroides	ovatus
Otu00395	148	Bacteria	Bacteroidetes	Bacteroidia	Bacteroidales	Rikenellaceae	Alistipes	Alistipes_unclassified
Otu00396	147	Bacteria	Firmicutes	Clostridia	Clostridiales	Clostridiales_unclassified	Clostridiales_unclassified	Clostridiales_unclassified
Otu00397	146	Bacteria	Bacteroidetes	Bacteroidia	Bacteroidales	Bacteroidales_unclassified	Bacteroidales_unclassified	Bacteroidales_unclassified
Otu00398	144	Bacteria	Proteobacteria	Gammaproteobacteria	Enterobacterales	Enterobacteriaceae	Enterobacteriaceae_unclassified	Enterobacteriaceae_unclassified
Otu00399	143	Bacteria	Firmicutes	Clostridia	Clostridiales	Ruminococcaceae	Ruminococcaceae_unclassified	Ruminococcaceae_unclassified
Otu00400	143	Bacteria	Firmicutes	Clostridia	Clostridiales	Ruminococcaceae	Faecalibacterium	prausnitzii
Otu00401	142	Bacteria	Bacteroidetes	Bacteroidia	Bacteroidales	Bacteroidaceae	Phocaeicola	vulgatus
Otu00402	142	Bacteria	Firmicutes	Clostridia	Clostridiales	Ruminococcaceae	Flavonifractor	plautii
Otu00403	141	Bacteria	Firmicutes	Clostridia	Clostridiales	Lachnospiraceae	Lachnospiraceae_unclassified	Lachnospiraceae_unclassified
Otu00404	141	Bacteria	Bacteroidetes	Bacteroidia	Bacteroidales	Bacteroidaceae	Phocaeicola	vulgatus
Otu00405	139	Bacteria	Firmicutes	Firmicutes_unclassified	Firmicutes_unclassified	Firmicutes_unclassified	Firmicutes_unclassified	Firmicutes_unclassified
Otu00406	138	Bacteria	Firmicutes	Clostridia	Clostridiales	Ruminococcaceae	Faecalibacterium	prausnitzii
Otu00407	138	Bacteria	Firmicutes	Clostridia	Clostridiales	Ruminococcaceae	Ruminococcaceae_unclassified	Ruminococcaceae_unclassified
Otu00408	138	Bacteria	Firmicutes	Clostridia	Clostridiales	Clostridiales_unclassified	Clostridiales_unclassified	Clostridiales_unclassified
Otu00409	135	Bacteria	Proteobacteria	Gammaproteobacteria	Enterobacterales	Enterobacteriaceae	Enterobacteriaceae_unclassified	Enterobacteriaceae_unclassified
Otu00410	134	Bacteria	Firmicutes	Clostridia	Clostridiales	Lachnospiraceae	Anaerotignum	lactatifermentans
Otu00411	133	Bacteria	Firmicutes	Clostridia	Clostridiales	Lachnospiraceae	Lachnospiraceae_unclassified	Lachnospiraceae_unclassified
Otu00412	132	Bacteria	Bacteroidetes	Bacteroidia	Bacteroidales	Rikenellaceae	Alistipes	indistinctus
Otu00413	131	Bacteria	Firmicutes	Clostridia	Clostridiales	Ruminococcaceae	Hydrogeniiclostridium	Hydrogeniiclostridium_unclassified
Otu00414	130	Bacteria	Firmicutes	Clostridia	Clostridiales	Lachnospiraceae	Lachnospiraceae_unclassified	Lachnospiraceae_unclassified
Otu00415	130	Bacteria	Bacteroidetes	Bacteroidia	Bacteroidales	Bacteroidaceae	Bacteroides	ovatus
Otu00416	129	Bacteria	Bacteroidetes	Bacteroidia	Bacteroidales	Bacteroidaceae	Bacteroides	Bacteroides_unclassified
Otu00417	129	Bacteria	Firmicutes	Clostridia	Clostridiales	Lachnospiraceae	Blautia	wexlerae
Otu00418	127	Bacteria	Firmicutes	Clostridia	Clostridiales	Lachnospiraceae	Blautia	luti
Otu00419	126	Bacteria	Firmicutes	Clostridia	Clostridiales	Clostridiaceae 1	Clostridium sensu stricto	Clostridium sensu stricto_unclassified
Otu00420	126	Bacteria	Firmicutes	Clostridia	Clostridiales	Clostridiales_unclassified	Clostridiales_unclassified	Clostridiales_unclassified
Otu00421	126	Bacteria	Bacteroidetes	Bacteroidia	Bacteroidales	Bacteroidaceae	Phocaeicola	vulgatus
Otu00422	126	Bacteria	Bacteroidetes	Bacteroidia	Bacteroidales	Bacteroidaceae	Phocaeicola	vulgatus
Otu00423	125	Bacteria	Firmicutes	Clostridia	Clostridiales	Lachnospiraceae	Dorea	longicatena
Otu00424	125	Bacteria	Firmicutes	Bacilli	Lactobacillales	Streptococcaceae	Lactococcus	lactis
Otu00425	124	Bacteria	Firmicutes	Clostridia	Clostridiales	Christensenellaceae	Beduinibacterium	Beduinibacterium_unclassified
Otu00426	123	Bacteria	Firmicutes	Clostridia	Clostridiales	Ruminococcaceae	Ruminococcaceae_unclassified	Ruminococcaceae_unclassified
Otu00427	123	Bacteria	Firmicutes	Clostridia	Clostridiales	Peptostreptococcaceae	Peptostreptococcaceae_unclassified	Peptostreptococcaceae_unclassified
Otu00428	122	Bacteria	Proteobacteria	Gammaproteobacteria	Enterobacterales	Enterobacteriaceae	Enterobacteriaceae_unclassified	Enterobacteriaceae_unclassified
Otu00429	121	Bacteria	Firmicutes	Clostridia	Clostridiales	Lachnospiraceae	Lachnospiraceae_unclassified	Lachnospiraceae_unclassified
Otu00430	121	Bacteria	Firmicutes	Clostridia	Clostridia_unclassified	Clostridia_unclassified	Clostridia_unclassified	Clostridia_unclassified
Otu00431	120	Bacteria	Firmicutes	Clostridia	Clostridiales	Ruminococcaceae	Ruminococcaceae_unclassified	Ruminococcaceae_unclassified
Otu00432	119	Bacteria	Bacteroidetes	Bacteroidia	Bacteroidales	Prevotellaceae	Prevotella	stercorea
Otu00433	119	Bacteria	Firmicutes	Clostridia	Clostridiales	Ruminococcaceae	Oscillibacter	ruminantium
Otu00434	117	Bacteria	Firmicutes	Firmicutes_unclassified	Firmicutes_unclassified	Firmicutes_unclassified	Firmicutes_unclassified	Firmicutes_unclassified
Otu00435	117	Bacteria	Proteobacteria	Alphaproteobacteria	Alphaproteobacteria_unclassified	Alphaproteobacteria_unclassified	Alphaproteobacteria_unclassified	Alphaproteobacteria_unclassified
Otu00436	117	Bacteria	Firmicutes	Clostridia	Clostridiales	Lachnospiraceae	Blautia	Blautia_unclassified
Otu00437	114	Bacteria	Firmicutes	Clostridia	Clostridiales	Clostridiales_unclassified	Clostridiales_unclassified	Clostridiales_unclassified
Otu00438	114	Bacteria	Bacteroidetes	Bacteroidia	Bacteroidales	Bacteroidaceae	Bacteroides	Bacteroides_unclassified
Otu00439	113	Bacteria	Firmicutes	Clostridia	Clostridiales	Clostridiaceae 1	Clostridium sensu stricto	butyricum
Otu00440	113	Bacteria	Bacteroidetes	Bacteroidia	Bacteroidales	Bacteroidaceae	Bacteroides	Bacteroides_unclassified
Otu00441	113	Bacteria	Bacteroidetes	Bacteroidia	Bacteroidales	Bacteroidaceae	Bacteroides	uniformis
Otu00442	112	Bacteria	Bacteroidetes	Bacteroidia	Bacteroidales	Bacteroidaceae	Bacteroides	Bacteroides_unclassified
Otu00443	109	Bacteria	Firmicutes	Firmicutes_unclassified	Firmicutes_unclassified	Firmicutes_unclassified	Firmicutes_unclassified	Firmicutes_unclassified
Otu00444	109	Bacteria	Firmicutes	Firmicutes_unclassified	Firmicutes_unclassified	Firmicutes_unclassified	Firmicutes_unclassified	Firmicutes_unclassified
Otu00445	109	Bacteria	Firmicutes	Clostridia	Clostridiales	Ruminococcaceae	Ruminococcaceae_unclassified	Ruminococcaceae_unclassified
Otu00446	109	Bacteria	Firmicutes	Clostridia	Clostridiales	Ruminococcaceae	Agathobaculum	Agathobaculum_unclassified
Otu00447	109	Bacteria	Firmicutes	Clostridia	Clostridiales	Lachnospiraceae	Blautia	Blautia_unclassified
Otu00448	108	Bacteria	Firmicutes	Clostridia	Clostridiales	Ruminococcaceae	Ruminococcaceae_unclassified	Ruminococcaceae_unclassified
Otu00449	108	Bacteria	Firmicutes	Clostridia	Clostridiales	Eubacteriaceae	Anaerofustis	stercorihominis
Otu00450	108	Bacteria	Bacteroidetes	Bacteroidia	Bacteroidales	Rikenellaceae	Alistipes	Alistipes_unclassified
Otu00451	107	Bacteria	Firmicutes	Clostridia	Clostridiales	Lachnospiraceae	Agathobacter	Agathobacter_unclassified
Otu00452	107	Bacteria	Bacteroidetes	Bacteroidia	Bacteroidales	Bacteroidaceae	Phocaeicola	vulgatus
Otu00453	107	Bacteria	Actinobacteria	Actinobacteria	Bifidobacteriales	Bifidobacteriaceae	Bifidobacterium	Bifidobacterium_unclassified
Otu00454	107	Bacteria	Firmicutes	Clostridia	Clostridiales	Lachnospiraceae	Anaerobutyricum	Anaerobutyricum_unclassified
Otu00455	106	Bacteria	Firmicutes	Clostridia	Clostridiales	Clostridiales_unclassified	Clostridiales_unclassified	Clostridiales_unclassified
Otu00456	106	Bacteria	Firmicutes	Clostridia	Clostridiales	Clostridiales_unclassified	Clostridiales_unclassified	Clostridiales_unclassified
Otu00457	106	Bacteria	Firmicutes	Clostridia	Clostridiales	Lachnospiraceae	Lachnospiraceae_unclassified	Lachnospiraceae_unclassified
Otu00458	106	Bacteria	Bacteroidetes	Bacteroidia	Bacteroidales	Bacteroidaceae	Phocaeicola	vulgatus
Otu00459	105	Bacteria	Firmicutes	Clostridia	Clostridiales	Clostridiales_unclassified	Clostridiales_unclassified	Clostridiales_unclassified
Otu00460	105	Bacteria	Firmicutes	Clostridia	Clostridiales	Ruminococcaceae	Ruminococcaceae_unclassified	Ruminococcaceae_unclassified
Otu00461	104	Bacteria	Firmicutes	Clostridia	Clostridiales	Lachnospiraceae	Eisenbergiella	tayi
Otu00462	104	Bacteria	Firmicutes	Clostridia	Clostridiales	Lachnospiraceae	Lachnospiraceae_unclassified	Lachnospiraceae_unclassified
Otu00463	104	Bacteria	Bacteroidetes	Bacteroidia	Bacteroidales	Porphyromonadaceae	Parabacteroides	distasonis
Otu00464	104	Bacteria	Actinobacteria	Actinobacteria	Bifidobacteriales	Bifidobacteriaceae	Bifidobacterium	Bifidobacterium_unclassified
Otu00465	104	Bacteria	Firmicutes	Clostridia	Clostridiales	Ruminococcaceae	Faecalibacterium	prausnitzii
Otu00466	104	Bacteria	Firmicutes	Erysipelotrichia	Erysipelotrichales	Erysipelotrichaceae	Erysipelotrichaceae_unclassified	Erysipelotrichaceae_unclassified
Otu00467	103	Bacteria	Bacteria_unclassified	Bacteria_unclassified	Bacteria_unclassified	Bacteria_unclassified	Bacteria_unclassified	Bacteria_unclassified
Otu00468	103	Bacteria	Firmicutes	Clostridia	Clostridiales	Ruminococcaceae	Ruminococcaceae_unclassified	Ruminococcaceae_unclassified
Otu00469	102	Bacteria	Firmicutes	Clostridia	Clostridiales	Clostridiales_Incertae Sedis XIII	Clostridiales_Incertae Sedis XIII_unclassified	Clostridiales_Incertae Sedis XIII_unclassified
Otu00470	102	Bacteria	Bacteroidetes	Bacteroidia	Bacteroidales	Bacteroidaceae	Bacteroides	thetaiotaomicron VPI-5482
Otu00471	101	Bacteria	Firmicutes	Clostridia	Clostridiales	Ruminococcaceae	Ruminococcaceae_unclassified	Ruminococcaceae_unclassified
Otu00472	100	Bacteria	Firmicutes	Clostridia	Clostridiales	Lachnospiraceae	Dorea	longicatena
Otu00473	100	Bacteria	Proteobacteria	Gammaproteobacteria	Enterobacterales	Enterobacteriaceae	Enterobacteriaceae_unclassified	Enterobacteriaceae_unclassified
Otu00474	99	Bacteria	Firmicutes	Negativicutes	Veillonellales	Veillonellaceae	Dialister	Dialister_unclassified
Otu00475	98	Bacteria	Firmicutes	Clostridia	Clostridiales	Clostridiales_unclassified	Clostridiales_unclassified	Clostridiales_unclassified
Otu00476	97	Bacteria	Actinobacteria	Coriobacteriia	Coriobacteriales	Coriobacteriaceae	Collinsella	aerofaciens
Otu00477	97	Bacteria	Firmicutes	Clostridia	Clostridiales	Ruminococcaceae	Ruminococcaceae_unclassified	Ruminococcaceae_unclassified
Otu00478	96	Bacteria	Firmicutes	Clostridia	Clostridiales	Ruminococcaceae	Faecalibacterium	prausnitzii
Otu00479	96	Bacteria	Firmicutes	Clostridia	Clostridiales	Lachnospiraceae	Blautia	Blautia_unclassified
Otu00480	95	Bacteria	Firmicutes	Clostridia	Clostridiales	Clostridiales_unclassified	Clostridiales_unclassified	Clostridiales_unclassified
Otu00481	95	Bacteria	Bacteroidetes	Bacteroidia	Bacteroidales	Bacteroidaceae	Phocaeicola	vulgatus
Otu00482	94	Bacteria	Firmicutes	Clostridia	Clostridiales	Lachnospiraceae	Dorea	longicatena
Otu00483	94	Bacteria	Firmicutes	Clostridia	Clostridiales	Ruminococcaceae	Phocea	Phocea_unclassified
Otu00484	94	Bacteria	Verrucomicrobia	Verrucomicrobiae	Verrucomicrobiales	Akkermansiaceae	Akkermansia	muciniphila
Otu00485	93	Bacteria	Actinobacteria	Actinobacteria	Bifidobacteriales	Bifidobacteriaceae	Bifidobacterium	adolescentis
Otu00486	92	Bacteria	Firmicutes	Clostridia	Clostridiales	Lachnospiraceae	Agathobacter	Agathobacter_unclassified
Otu00487	90	Bacteria	Bacteroidetes	Bacteroidia	Bacteroidales	Bacteroidaceae	Phocaeicola	vulgatus
Otu00488	90	Bacteria	Firmicutes	Clostridia	Clostridiales	Lachnospiraceae	Blautia	Blautia_unclassified
Otu00489	90	Bacteria	Firmicutes	Clostridia	Clostridiales	Lachnospiraceae	Lachnospiraceae_unclassified	Lachnospiraceae_unclassified
Otu00490	89	Bacteria	Bacteroidetes	Bacteroidia	Bacteroidales	Bacteroidaceae	Bacteroides	Bacteroides_unclassified
Otu00491	89	Bacteria	Firmicutes	Clostridia	Clostridiales	Clostridiales_unclassified	Clostridiales_unclassified	Clostridiales_unclassified
Otu00492	89	Bacteria	Firmicutes	Clostridia	Clostridiales	Lachnospiraceae	Lachnospiraceae_unclassified	Lachnospiraceae_unclassified
Otu00493	89	Bacteria	Firmicutes	Clostridia	Clostridiales	Lachnospiraceae	Blautia	obeum
Otu00494	89	Bacteria	Bacteroidetes	Bacteroidia	Bacteroidales	Bacteroidaceae	Bacteroides	Bacteroides_unclassified
Otu00495	88	Bacteria	Bacteroidetes	Bacteroidia	Bacteroidales	Bacteroidaceae	Phocaeicola	vulgatus
Otu00496	88	Bacteria	Firmicutes	Clostridia	Clostridiales	Ruminococcaceae	Ruminococcaceae_unclassified	Ruminococcaceae_unclassified
Otu00497	87	Bacteria	Bacteroidetes	Bacteroidia	Bacteroidales	Barnesiellaceae	Barnesiella	intestinihominis
Otu00498	86	Bacteria	Bacteroidetes	Bacteroidia	Bacteroidales	Bacteroidaceae	Phocaeicola	vulgatus
Otu00499	86	Bacteria	Firmicutes	Clostridia	Clostridiales	Lachnospiraceae	Anaerotignum	Anaerotignum_unclassified
Otu00500	85	Bacteria	Bacteroidetes	Bacteroidia	Bacteroidales	Bacteroidaceae	Bacteroides	thetaiotaomicron VPI-5482
Otu00501	85	Bacteria	Bacteroidetes	Bacteroidia	Bacteroidales	Bacteroidaceae	Phocaeicola	vulgatus
Otu00502	85	Bacteria	Proteobacteria	Betaproteobacteria	Burkholderiales	Sutterellaceae	Sutterella	wadsworthensis
Otu00503	84	Bacteria	Firmicutes	Clostridia	Clostridiales	Ruminococcaceae	Anaeromassilibacillus	Anaeromassilibacillus_unclassified
Otu00504	84	Bacteria	Firmicutes	Clostridia	Clostridiales	Ruminococcaceae	Ruminococcaceae_unclassified	Ruminococcaceae_unclassified
Otu00505	84	Bacteria	Firmicutes	Clostridia	Clostridiales	Ruminococcaceae	Ruminococcaceae_unclassified	Ruminococcaceae_unclassified
Otu00506	84	Bacteria	Bacteroidetes	Bacteroidia	Bacteroidales	Prevotellaceae	Prevotella	stercorea
Otu00507	84	Bacteria	Firmicutes	Clostridia	Clostridiales	Lachnospiraceae	Anaerotignum	lactatifermentans
Otu00508	83	Bacteria	Firmicutes	Clostridia	Clostridiales	Ruminococcaceae	Neglecta	Neglecta_unclassified
Otu00509	83	Bacteria	Verrucomicrobia	Verrucomicrobiae	Verrucomicrobiales	Akkermansiaceae	Akkermansia	muciniphila
Otu00510	83	Bacteria	Firmicutes	Clostridia	Clostridiales	Clostridiales_unclassified	Clostridiales_unclassified	Clostridiales_unclassified
Otu00511	82	Bacteria	Firmicutes	Clostridia	Clostridiales	Lachnospiraceae	Blautia	Blautia_unclassified
Otu00512	82	Bacteria	Firmicutes	Clostridia	Clostridiales	Clostridiaceae 1	Clostridium sensu stricto	butyricum
Otu00513	82	Bacteria	Actinobacteria	Coriobacteriia	Eggerthellales	Eggerthellaceae	Eggerthella	lenta
Otu00514	81	Bacteria	Proteobacteria	Betaproteobacteria	Burkholderiales	Sutterellaceae	Sutterella	wadsworthensis
Otu00515	80	Bacteria	Actinobacteria	Coriobacteriia	Coriobacteriales	Coriobacteriaceae	Collinsella	aerofaciens
Otu00516	79	Bacteria	Firmicutes	Clostridia	Clostridiales	Clostridiales_unclassified	Clostridiales_unclassified	Clostridiales_unclassified
Otu00517	79	Bacteria	Actinobacteria	Coriobacteriia	Coriobacteriales	Coriobacteriaceae	Collinsella	aerofaciens
Otu00518	79	Bacteria	Firmicutes	Clostridia	Clostridiales	Lachnospiraceae	Blautia	Blautia_unclassified
Otu00519	79	Bacteria	Firmicutes	Clostridia	Clostridia_unclassified	Clostridia_unclassified	Clostridia_unclassified	Clostridia_unclassified
Otu00520	79	Bacteria	Firmicutes	Clostridia	Clostridiales	Lachnospiraceae	Blautia	Blautia_unclassified
Otu00521	79	Bacteria	Firmicutes	Clostridia	Clostridiales	Lachnospiraceae	Blautia	Blautia_unclassified
Otu00522	78	Bacteria	Firmicutes	Bacilli	Lactobacillales	Lactobacillaceae	Lactobacillus	iners
Otu00523	78	Bacteria	Firmicutes	Clostridia	Clostridiales	Lachnospiraceae	Blautia	luti
Otu00524	78	Bacteria	Firmicutes	Clostridia	Clostridiales	Lachnospiraceae	Lachnospiraceae_unclassified	Lachnospiraceae_unclassified
Otu00525	78	Bacteria	Bacteroidetes	Bacteroidia	Bacteroidales	Bacteroidaceae	Bacteroides	ovatus
Otu00526	77	Bacteria	Firmicutes	Clostridia	Clostridiales	Lachnospiraceae	Anaerotignum	Anaerotignum_unclassified
Otu00527	77	Bacteria	Bacteroidetes	Bacteroidia	Bacteroidales	Bacteroidaceae	Bacteroides	Bacteroides_unclassified
Otu00528	77	Bacteria	Firmicutes	Clostridia	Clostridiales	Clostridiales_unclassified	Clostridiales_unclassified	Clostridiales_unclassified
Otu00529	77	Bacteria	Bacteroidetes	Bacteroidia	Bacteroidales	Bacteroidaceae	Phocaeicola	vulgatus
Otu00530	76	Bacteria	Firmicutes	Clostridia	Clostridiales	Ruminococcaceae	Faecalibacterium	prausnitzii
Otu00531	76	Bacteria	Bacteroidetes	Bacteroidia	Bacteroidales	Bacteroidaceae	Phocaeicola	vulgatus
Otu00532	76	Bacteria	Firmicutes	Clostridia	Clostridiales	Ruminococcaceae	Ruminococcaceae_unclassified	Ruminococcaceae_unclassified
Otu00533	76	Bacteria	Firmicutes	Clostridia	Clostridiales	Lachnospiraceae	Anaerobutyricum	Anaerobutyricum_unclassified
Otu00534	75	Bacteria	Firmicutes	Clostridia	Clostridiales	Clostridiales_unclassified	Clostridiales_unclassified	Clostridiales_unclassified
Otu00535	75	Bacteria	Firmicutes	Clostridia	Clostridiales	Lachnospiraceae	Blautia	luti
Otu00536	75	Bacteria	Firmicutes	Clostridia	Clostridiales	Lachnospiraceae	Anaerobutyricum	Anaerobutyricum_unclassified
Otu00537	74	Bacteria	Firmicutes	Firmicutes_unclassified	Firmicutes_unclassified	Firmicutes_unclassified	Firmicutes_unclassified	Firmicutes_unclassified
Otu00538	74	Bacteria	Bacteroidetes	Bacteroidia	Bacteroidales	Rikenellaceae	Alistipes	Alistipes_unclassified
Otu00539	74	Bacteria	Bacteroidetes	Bacteroidia	Bacteroidales	Rikenellaceae	Alistipes	putredinis
Otu00540	74	Bacteria	Bacteroidetes	Bacteroidia	Bacteroidales	Bacteroidaceae	Phocaeicola	vulgatus
Otu00541	73	Bacteria	Actinobacteria	Actinobacteria	Bifidobacteriales	Bifidobacteriaceae	Bifidobacterium	Bifidobacterium_unclassified
Otu00542	72	Bacteria	Firmicutes	Clostridia	Clostridiales	Clostridiales_unclassified	Clostridiales_unclassified	Clostridiales_unclassified
Otu00543	72	Bacteria	Firmicutes	Clostridia	Clostridiales	Ruminococcaceae	Ruminococcaceae_unclassified	Ruminococcaceae_unclassified
Otu00544	72	Bacteria	Firmicutes	Clostridia	Clostridiales	Lachnospiraceae	Lachnospiraceae_unclassified	Lachnospiraceae_unclassified
Otu00545	72	Bacteria	Firmicutes	Clostridia	Clostridiales	Clostridiaceae 1	Clostridium sensu stricto	Clostridium sensu stricto_unclassified
Otu00546	71	Bacteria	Firmicutes	Clostridia	Clostridiales	Ruminococcaceae	Ruminococcaceae_unclassified	Ruminococcaceae_unclassified
Otu00547	71	Bacteria	Firmicutes	Clostridia	Clostridiales	Lachnospiraceae	Lachnospiraceae_unclassified	Lachnospiraceae_unclassified
Otu00548	71	Bacteria	Firmicutes	Clostridia	Clostridiales	Ruminococcaceae	Ruminococcaceae_unclassified	Ruminococcaceae_unclassified
Otu00549	71	Bacteria	Bacteroidetes	Bacteroidia	Bacteroidales	Bacteroidaceae	Bacteroides	Bacteroides_unclassified
Otu00550	70	Bacteria	Firmicutes	Clostridia	Clostridiales	Ruminococcaceae	Faecalibacterium	prausnitzii
Otu00551	70	Bacteria	Firmicutes	Clostridia	Clostridiales	Peptoniphilaceae	Peptoniphilus	Peptoniphilus_unclassified
Otu00552	70	Bacteria	Firmicutes	Clostridia	Clostridiales	Lachnospiraceae	Blautia	Blautia_unclassified
Otu00553	70	Bacteria	Firmicutes	Clostridia	Clostridiales	Lachnospiraceae	Lachnospiraceae_unclassified	Lachnospiraceae_unclassified
Otu00554	70	Bacteria	Bacteroidetes	Bacteroidia	Bacteroidales	Bacteroidaceae	Phocaeicola	vulgatus
Otu00555	69	Bacteria	Bacteroidetes	Bacteroidia	Bacteroidales	Bacteroidaceae	Phocaeicola	vulgatus
Otu00556	69	Bacteria	Firmicutes	Clostridia	Clostridiales	Clostridiales_unclassified	Clostridiales_unclassified	Clostridiales_unclassified
Otu00557	69	Bacteria	Firmicutes	Clostridia	Clostridiales	Ruminococcaceae	Ruminococcaceae_unclassified	Ruminococcaceae_unclassified
Otu00558	69	Bacteria	Bacteroidetes	Bacteroidia	Bacteroidales	Bacteroidaceae	Phocaeicola	vulgatus
Otu00559	69	Archaea	Euryarchaeota	Methanobacteria	Methanobacteriales	Methanobacteriaceae	Methanobrevibacter	Methanobrevibacter_unclassified
Otu00560	69	Bacteria	Firmicutes	Clostridia	Clostridia_unclassified	Clostridia_unclassified	Clostridia_unclassified	Clostridia_unclassified
Otu00561	69	Bacteria	Firmicutes	Clostridia	Clostridiales	Lachnospiraceae	Lachnospiraceae_unclassified	Lachnospiraceae_unclassified
Otu00562	69	Bacteria	Bacteroidetes	Bacteroidia	Bacteroidales	Bacteroidaceae	Phocaeicola	vulgatus
Otu00563	68	Bacteria	Firmicutes	Clostridia	Clostridiales	Ruminococcaceae	Ruminococcaceae_unclassified	Ruminococcaceae_unclassified
Otu00564	68	Bacteria	Bacteroidetes	Bacteroidia	Bacteroidales	Bacteroidaceae	Phocaeicola	vulgatus
Otu00565	68	Bacteria	Bacteroidetes	Bacteroidia	Bacteroidales	Bacteroidaceae	Phocaeicola	vulgatus
Otu00566	68	Bacteria	Firmicutes	Clostridia	Clostridiales	Ruminococcaceae	Ruminococcaceae_unclassified	Ruminococcaceae_unclassified
Otu00567	68	Bacteria	Bacteroidetes	Bacteroidia	Bacteroidales	Bacteroidaceae	Phocaeicola	vulgatus
Otu00568	67	Bacteria	Firmicutes	Clostridia	Clostridiales	Lachnospiraceae	Blautia	wexlerae
Otu00569	67	Bacteria	Bacteroidetes	Bacteroidia	Bacteroidales	Bacteroidaceae	Phocaeicola	vulgatus
Otu00570	67	Bacteria	Firmicutes	Firmicutes_unclassified	Firmicutes_unclassified	Firmicutes_unclassified	Firmicutes_unclassified	Firmicutes_unclassified
Otu00571	67	Bacteria	Bacteroidetes	Bacteroidia	Bacteroidales	Bacteroidaceae	Phocaeicola	vulgatus
Otu00572	67	Bacteria	Firmicutes	Clostridia	Clostridia_unclassified	Clostridia_unclassified	Clostridia_unclassified	Clostridia_unclassified
Otu00573	66	Bacteria	Actinobacteria	Actinobacteria	Bifidobacteriales	Bifidobacteriaceae	Bifidobacterium	adolescentis
Otu00574	66	Bacteria	Actinobacteria	Coriobacteriia	Coriobacteriales	Coriobacteriaceae	Collinsella	aerofaciens
Otu00575	66	Bacteria	Proteobacteria	Gammaproteobacteria	Enterobacterales	Enterobacteriaceae	Enterobacteriaceae_unclassified	Enterobacteriaceae_unclassified
Otu00576	66	Bacteria	Firmicutes	Clostridia	Clostridiales	Clostridiales_unclassified	Clostridiales_unclassified	Clostridiales_unclassified
Otu00577	65	Bacteria	Firmicutes	Clostridia	Clostridiales	Lachnospiraceae	Lachnospiraceae_unclassified	Lachnospiraceae_unclassified
Otu00578	65	Bacteria	Firmicutes	Firmicutes_unclassified	Firmicutes_unclassified	Firmicutes_unclassified	Firmicutes_unclassified	Firmicutes_unclassified
Otu00579	65	Bacteria	Bacteria_unclassified	Bacteria_unclassified	Bacteria_unclassified	Bacteria_unclassified	Bacteria_unclassified	Bacteria_unclassified
Otu00580	65	Bacteria	Firmicutes	Clostridia	Clostridiales	Lachnospiraceae	Frisingicoccus	Frisingicoccus_unclassified
Otu00581	65	Bacteria	Actinobacteria	Actinobacteria	Bifidobacteriales	Bifidobacteriaceae	Bifidobacterium	Bifidobacterium_unclassified
Otu00582	65	Bacteria	Firmicutes	Clostridia	Clostridiales	Ruminococcaceae	Oscillibacter	ruminantium
Otu00583	64	Bacteria	Bacteroidetes	Bacteroidia	Bacteroidales	Bacteroidaceae	Phocaeicola	vulgatus
Otu00584	64	Bacteria	Firmicutes	Clostridia	Clostridiales	Lachnospiraceae	Coprococcus	eutactus
Otu00585	64	Archaea	Euryarchaeota	Methanobacteria	Methanobacteriales	Methanobacteriaceae	Methanobrevibacter	Methanobrevibacter_unclassified
Otu00586	63	Bacteria	Verrucomicrobia	Verrucomicrobiae	Verrucomicrobiales	Akkermansiaceae	Akkermansia	muciniphila
Otu00587	63	Bacteria	Firmicutes	Clostridia	Clostridiales	Lachnospiraceae	Lachnospiraceae_unclassified	Lachnospiraceae_unclassified
Otu00588	63	Bacteria	Firmicutes	Clostridia	Clostridiales	Lachnospiraceae	Blautia	Blautia_unclassified
Otu00589	63	Bacteria	Bacteroidetes	Bacteroidia	Bacteroidales	Bacteroidaceae	Bacteroides	Bacteroides_unclassified
Otu00590	62	Bacteria	Firmicutes	Clostridia	Clostridiales	Ruminococcaceae	Ruminococcaceae_unclassified	Ruminococcaceae_unclassified
Otu00591	62	Bacteria	Firmicutes	Clostridia	Clostridiales	Clostridiaceae 1	Clostridium sensu stricto	Clostridium sensu stricto_unclassified
Otu00592	62	Bacteria	Firmicutes	Clostridia	Clostridiales	Ruminococcaceae	Negativibacillus	Negativibacillus_unclassified
Otu00593	62	Bacteria	Actinobacteria	Actinobacteria	Bifidobacteriales	Bifidobacteriaceae	Bifidobacterium	adolescentis
Otu00594	62	Bacteria	Firmicutes	Bacilli	Lactobacillales	Lactobacillaceae	Leuconostoc	Leuconostoc_unclassified
Otu00595	62	Bacteria	Actinobacteria	Coriobacteriia	Coriobacteriales	Coriobacteriaceae	Collinsella	aerofaciens
Otu00596	61	Bacteria	Firmicutes	Clostridia	Clostridiales	Ruminococcaceae	Ruminococcaceae_unclassified	Ruminococcaceae_unclassified
Otu00597	61	Bacteria	Bacteroidetes	Bacteroidia	Bacteroidales	Bacteroidaceae	Phocaeicola	vulgatus
Otu00598	61	Bacteria	Bacteroidetes	Bacteroidia	Bacteroidales	Bacteroidaceae	Bacteroides	intestinalis
Otu00599	61	Bacteria	Firmicutes	Clostridia	Clostridiales	Lachnospiraceae	Blautia	Blautia_unclassified
Otu00600	61	Bacteria	Bacteroidetes	Bacteroidia	Bacteroidales	Bacteroidaceae	Bacteroides	Bacteroides_unclassified
Otu00601	61	Bacteria	Bacteroidetes	Bacteroidia	Bacteroidales	Bacteroidaceae	Phocaeicola	vulgatus
Otu00602	61	Bacteria	Firmicutes	Firmicutes_unclassified	Firmicutes_unclassified	Firmicutes_unclassified	Firmicutes_unclassified	Firmicutes_unclassified
Otu00603	61	Bacteria	Actinobacteria	Actinobacteria	Bifidobacteriales	Bifidobacteriaceae	Bifidobacterium	Bifidobacterium_unclassified
Otu00604	60	Bacteria	Proteobacteria	Gammaproteobacteria	Enterobacterales	Enterobacteriaceae	Enterobacteriaceae_unclassified	Enterobacteriaceae_unclassified
Otu00605	60	Bacteria	Firmicutes	Clostridia	Clostridiales	Lachnospiraceae	Blautia	Blautia_unclassified
Otu00606	60	Bacteria	Bacteria_unclassified	Bacteria_unclassified	Bacteria_unclassified	Bacteria_unclassified	Bacteria_unclassified	Bacteria_unclassified
Otu00607	59	Bacteria	Bacteria_unclassified	Bacteria_unclassified	Bacteria_unclassified	Bacteria_unclassified	Bacteria_unclassified	Bacteria_unclassified
Otu00608	59	Bacteria	Firmicutes	Clostridia	Clostridiales	Lachnospiraceae	Fusicatenibacter	saccharivorans
Otu00609	59	Bacteria	Firmicutes	Clostridia	Clostridiales	Lachnospiraceae	Dorea	longicatena
Otu00610	59	Bacteria	Actinobacteria	Actinobacteria	Bifidobacteriales	Bifidobacteriaceae	Bifidobacterium	Bifidobacterium_unclassified
Otu00611	59	Bacteria	Firmicutes	Clostridia	Clostridiales	Lachnospiraceae	Fusicatenibacter	saccharivorans
Otu00612	59	Bacteria	Firmicutes	Clostridia	Clostridiales	Lachnospiraceae	Blautia	Blautia_unclassified
Otu00613	59	Bacteria	Firmicutes	Clostridia	Clostridiales	Lachnospiraceae	Blautia	Blautia_unclassified
Otu00614	59	Bacteria	Bacteroidetes	Bacteroidia	Bacteroidales	Bacteroidaceae	Phocaeicola	vulgatus
Otu00615	58	Bacteria	Firmicutes	Clostridia	Clostridiales	Ruminococcaceae	Faecalibacterium	prausnitzii
Otu00616	58	Bacteria	Firmicutes	Clostridia	Clostridiales	Ruminococcaceae	Ruminococcaceae_unclassified	Ruminococcaceae_unclassified
Otu00617	58	Bacteria	Firmicutes	Clostridia	Clostridiales	Lachnospiraceae	Lachnospiraceae_unclassified	Lachnospiraceae_unclassified
Otu00618	58	Bacteria	Bacteroidetes	Bacteroidia	Bacteroidales	Bacteroidaceae	Phocaeicola	vulgatus
Otu00619	58	Bacteria	Bacteroidetes	Bacteroidia	Bacteroidales	Bacteroidaceae	Bacteroides	Bacteroides_unclassified
Otu00620	58	Bacteria	Proteobacteria	Gammaproteobacteria	Enterobacterales	Enterobacteriaceae	Enterobacteriaceae_unclassified	Enterobacteriaceae_unclassified
Otu00621	58	Bacteria	Bacteroidetes	Bacteroidia	Bacteroidales	Bacteroidaceae	Bacteroidaceae_unclassified	Bacteroidaceae_unclassified
Otu00622	58	Bacteria	Bacteroidetes	Bacteroidia	Bacteroidales	Bacteroidaceae	Phocaeicola	vulgatus
Otu00623	58	Bacteria	Firmicutes	Clostridia	Clostridiales	Lachnospiraceae	Blautia	obeum
Otu00624	57	Bacteria	Firmicutes	Clostridia	Clostridiales	Lachnospiraceae	Lachnospiraceae_unclassified	Lachnospiraceae_unclassified
Otu00625	57	Bacteria	Firmicutes	Clostridia	Clostridiales	Ruminococcaceae	Faecalibacterium	prausnitzii
Otu00626	57	Bacteria	Firmicutes	Clostridia	Clostridiales	Ruminococcaceae	Ruminococcus	bromii
Otu00627	57	Bacteria	Firmicutes	Clostridia	Clostridiales	Lachnospiraceae	Blautia	Blautia_unclassified
Otu00628	57	Bacteria	Firmicutes	Clostridia	Clostridiales	Lachnospiraceae	Blautia	Blautia_unclassified
Otu00629	57	Bacteria	Firmicutes	Clostridia	Clostridiales	Clostridiales_unclassified	Clostridiales_unclassified	Clostridiales_unclassified
Otu00630	57	Bacteria	Bacteroidetes	Bacteroidia	Bacteroidales	Bacteroidaceae	Bacteroides	Bacteroides_unclassified
Otu00631	57	Bacteria	Proteobacteria	Gammaproteobacteria	Enterobacterales	Enterobacteriaceae	Enterobacteriaceae_unclassified	Enterobacteriaceae_unclassified
Otu00632	56	Bacteria	Firmicutes	Clostridia	Clostridiales	Christensenellaceae	Christensenella	minuta
Otu00633	56	Bacteria	Firmicutes	Clostridia	Clostridiales	Lachnospiraceae	Lachnospiraceae_unclassified	Lachnospiraceae_unclassified
Otu00634	56	Bacteria	Firmicutes	Clostridia	Clostridiales	Lachnospiraceae	Blautia	luti
Otu00635	56	Bacteria	Bacteroidetes	Bacteroidia	Bacteroidales	Bacteroidaceae	Bacteroides	fragilis
Otu00636	56	Bacteria	Firmicutes	Negativicutes	Veillonellales	Veillonellaceae	Dialister	Dialister_unclassified
Otu00637	56	Bacteria	Firmicutes	Clostridia	Clostridiales	Ruminococcaceae	Ruminococcaceae_unclassified	Ruminococcaceae_unclassified
Otu00638	56	Bacteria	Firmicutes	Clostridia	Clostridiales	Clostridiales_Incertae Sedis XIII	Clostridiales_Incertae Sedis XIII_unclassified	Clostridiales_Incertae Sedis XIII_unclassified
Otu00639	55	Bacteria	Bacteroidetes	Bacteroidia	Bacteroidales	Porphyromonadaceae	Parabacteroides	distasonis
Otu00640	55	Bacteria	Proteobacteria	Betaproteobacteria	Burkholderiales	Oxalobacteraceae	Oxalobacteraceae_unclassified	Oxalobacteraceae_unclassified
Otu00641	55	Bacteria	Bacteroidetes	Bacteroidia	Bacteroidales	Bacteroidaceae	Phocaeicola	vulgatus
Otu00642	55	Bacteria	Actinobacteria	Coriobacteriia	Coriobacteriales	Coriobacteriaceae	Senegalimassilia	anaerobia
Otu00643	55	Bacteria	Firmicutes	Clostridia	Clostridiales	Ruminococcaceae	Ruminococcaceae_unclassified	Ruminococcaceae_unclassified
Otu00644	55	Bacteria	Firmicutes	Clostridia	Clostridiales	Ruminococcaceae	Faecalibacterium	prausnitzii
Otu00645	55	Bacteria	Firmicutes	Clostridia	Clostridiales	Ruminococcaceae	Oscillibacter	Oscillibacter_unclassified
Otu00646	55	Bacteria	Firmicutes	Clostridia	Clostridiales	Lachnospiraceae	Fusicatenibacter	saccharivorans
Otu00647	55	Bacteria	Firmicutes	Clostridia	Clostridiales	Lachnospiraceae	Lachnospiraceae_unclassified	Lachnospiraceae_unclassified
Otu00648	55	Bacteria	Firmicutes	Clostridia	Clostridiales	Lachnospiraceae	Lachnospiraceae_unclassified	Lachnospiraceae_unclassified
Otu00649	55	Bacteria	Bacteroidetes	Bacteroidia	Bacteroidales	Bacteroidaceae	Phocaeicola	vulgatus
Otu00650	54	Bacteria	Firmicutes	Clostridia	Clostridiales	Lachnospiraceae	Blautia	Blautia_unclassified
Otu00651	54	Bacteria	Bacteroidetes	Bacteroidia	Bacteroidales	Bacteroidaceae	Bacteroides	intestinalis
Otu00652	54	Bacteria	Firmicutes	Clostridia	Clostridiales	Lachnospiraceae	Anaerotignum	lactatifermentans
Otu00653	54	Bacteria	Firmicutes	Erysipelotrichia	Erysipelotrichales	Erysipelotrichaceae	Dielma	Dielma_unclassified
Otu00654	54	Bacteria	Firmicutes	Clostridia	Clostridiales	Ruminococcaceae	Ruminococcaceae_unclassified	Ruminococcaceae_unclassified
Otu00655	54	Bacteria	Proteobacteria	Betaproteobacteria	Burkholderiales	Sutterellaceae	Parasutterella	excrementihominis
Otu00656	54	Bacteria	Firmicutes	Clostridia	Clostridiales	Lachnospiraceae	Lachnospiraceae_unclassified	Lachnospiraceae_unclassified
Otu00657	54	Bacteria	Firmicutes	Clostridia	Clostridiales	Peptostreptococcaceae	Romboutsia	sedimentorum
Otu00658	53	Bacteria	Firmicutes	Clostridia	Clostridiales	Ruminococcaceae	Ruminococcaceae_unclassified	Ruminococcaceae_unclassified
Otu00659	53	Bacteria	Firmicutes	Clostridia	Clostridia_unclassified	Clostridia_unclassified	Clostridia_unclassified	Clostridia_unclassified
Otu00660	53	Bacteria	Firmicutes	Clostridia	Clostridiales	Lachnospiraceae	Lachnospiraceae_unclassified	Lachnospiraceae_unclassified
Otu00661	53	Bacteria	Firmicutes	Clostridia	Clostridiales	Clostridiales_unclassified	Clostridiales_unclassified	Clostridiales_unclassified
Otu00662	53	Bacteria	Bacteroidetes	Bacteroidia	Bacteroidales	Odoribacteraceae	Butyricimonas	Butyricimonas_unclassified
Otu00663	53	Bacteria	Bacteroidetes	Bacteroidia	Bacteroidales	Porphyromonadaceae	Parabacteroides	merdae
Otu00664	53	Bacteria	Bacteroidetes	Bacteroidia	Bacteroidales	Bacteroidaceae	Phocaeicola	vulgatus
Otu00665	53	Bacteria	Firmicutes	Clostridia	Clostridiales	Lachnospiraceae	Lachnospiraceae_unclassified	Lachnospiraceae_unclassified
Otu00666	52	Bacteria	Firmicutes	Negativicutes	Veillonellales	Veillonellaceae	Dialister	Dialister_unclassified
Otu00667	52	Bacteria	Firmicutes	Negativicutes	Veillonellales	Veillonellaceae	Dialister	succinatiphilus
Otu00668	52	Bacteria	Firmicutes	Clostridia	Clostridiales	Lachnospiraceae	Blautia	wexlerae
Otu00669	52	Bacteria	Proteobacteria	Alphaproteobacteria	Alphaproteobacteria_unclassified	Alphaproteobacteria_unclassified	Alphaproteobacteria_unclassified	Alphaproteobacteria_unclassified
Otu00670	52	Bacteria	Bacteroidetes	Bacteroidia	Bacteroidales	Prevotellaceae	Prevotella	stercorea
Otu00671	52	Bacteria	Actinobacteria	Actinobacteria	Bifidobacteriales	Bifidobacteriaceae	Bifidobacterium	adolescentis
Otu00672	52	Bacteria	Bacteroidetes	Bacteroidia	Bacteroidales	Bacteroidaceae	Phocaeicola	vulgatus
Otu00673	52	Bacteria	Firmicutes	Clostridia	Clostridiales	Lachnospiraceae	Lachnospiraceae_unclassified	Lachnospiraceae_unclassified
Otu00674	52	Bacteria	Actinobacteria	Actinobacteria	Bifidobacteriales	Bifidobacteriaceae	Bifidobacterium	Bifidobacterium_unclassified
Otu00675	51	Bacteria	Actinobacteria	Actinobacteria	Actinomycetales	Actinomycetaceae	Schaalia	odontolyticus
Otu00676	51	Bacteria	Bacteroidetes	Bacteroidia	Bacteroidales	Bacteroidaceae	Phocaeicola	vulgatus
Otu00677	51	Bacteria	Bacteroidetes	Bacteroidia	Bacteroidales	Bacteroidaceae	Bacteroides	Bacteroides_unclassified
Otu00678	51	Bacteria	Firmicutes	Clostridia	Clostridiales	Lachnospiraceae	Fusicatenibacter	saccharivorans
Otu00679	51	Bacteria	Bacteroidetes	Bacteroidia	Bacteroidales	Bacteroidaceae	Bacteroides	Bacteroides_unclassified
Otu00680	50	Bacteria	Firmicutes	Clostridia	Clostridiales	Lachnospiraceae	Lachnospiraceae_unclassified	Lachnospiraceae_unclassified
Otu00681	50	Bacteria	Firmicutes	Firmicutes_unclassified	Firmicutes_unclassified	Firmicutes_unclassified	Firmicutes_unclassified	Firmicutes_unclassified
Otu00682	50	Bacteria	Firmicutes	Clostridia	Clostridiales	Lachnospiraceae	Fusicatenibacter	saccharivorans
Otu00683	50	Bacteria	Bacteroidetes	Bacteroidia	Bacteroidales	Bacteroidaceae	Phocaeicola	vulgatus
Otu00684	50	Bacteria	Firmicutes	Clostridia	Clostridiales	Lachnospiraceae	Lachnospiraceae_unclassified	Lachnospiraceae_unclassified
Otu00685	50	Bacteria	Firmicutes	Clostridia	Clostridiales	Ruminococcaceae	Ruminococcaceae_unclassified	Ruminococcaceae_unclassified
Otu00686	49	Bacteria	Firmicutes	Clostridia	Clostridiales	Lachnospiraceae	Fusicatenibacter	saccharivorans
Otu00687	49	Bacteria	Actinobacteria	Actinobacteria	Bifidobacteriales	Bifidobacteriaceae	Bifidobacterium	Bifidobacterium_unclassified
Otu00688	49	Bacteria	Firmicutes	Clostridia	Clostridiales	Ruminococcaceae	Ruminococcaceae_unclassified	Ruminococcaceae_unclassified
Otu00689	49	Bacteria	Actinobacteria	Actinobacteria	Bifidobacteriales	Bifidobacteriaceae	Bifidobacterium	adolescentis
Otu00690	49	Bacteria	Bacteroidetes	Bacteroidia	Bacteroidales	Bacteroidaceae	Bacteroides	ovatus
Otu00691	48	Bacteria	Firmicutes	Clostridia	Clostridiales	Lachnospiraceae	Anaerotignum	Anaerotignum_unclassified
Otu00692	48	Bacteria	Bacteroidetes	Bacteroidia	Bacteroidales	Bacteroidaceae	Phocaeicola	vulgatus
Otu00693	48	Bacteria	Bacteroidetes	Bacteroidia	Bacteroidales	Bacteroidaceae	Bacteroides	Bacteroides_unclassified
Otu00694	48	Bacteria	Firmicutes	Clostridia	Clostridiales	Lachnospiraceae	Blautia	Blautia_unclassified
Otu00695	48	Bacteria	Firmicutes	Clostridia	Clostridiales	Lachnospiraceae	Lachnospiraceae_unclassified	Lachnospiraceae_unclassified
Otu00696	48	Bacteria	Bacteroidetes	Bacteroidia	Bacteroidales	Bacteroidaceae	Bacteroides	Bacteroides_unclassified
Otu00697	48	Bacteria	Firmicutes	Clostridia	Clostridiales	Lachnospiraceae	Lachnospiraceae_unclassified	Lachnospiraceae_unclassified
Otu00698	48	Bacteria	Firmicutes	Clostridia	Clostridiales	Ruminococcaceae	Ruminococcaceae_unclassified	Ruminococcaceae_unclassified
Otu00699	48	Bacteria	Firmicutes	Clostridia	Clostridiales	Lachnospiraceae	Coprococcus	comes
Otu00700	48	Bacteria	Firmicutes	Clostridia	Clostridiales	Ruminococcaceae	Ruminococcaceae_unclassified	Ruminococcaceae_unclassified
Otu00701	48	Bacteria	Bacteroidetes	Bacteroidia	Bacteroidales	Porphyromonadaceae	Parabacteroides	distasonis
Otu00702	48	Bacteria	Firmicutes	Clostridia	Clostridiales	Ruminococcaceae	Ruminococcaceae_unclassified	Ruminococcaceae_unclassified
Otu00703	48	Bacteria	Bacteroidetes	Bacteroidia	Bacteroidales	Bacteroidaceae	Phocaeicola	vulgatus
Otu00704	48	Bacteria	Actinobacteria	Coriobacteriia	Eggerthellales	Eggerthellaceae	Eggerthellaceae_unclassified	Eggerthellaceae_unclassified
Otu00705	48	Bacteria	Firmicutes	Clostridia	Clostridiales	Eubacteriaceae	Eubacterium	coprostanoligenes
Otu00706	48	Bacteria	Proteobacteria	Betaproteobacteria	Burkholderiales	Sutterellaceae	Parasutterella	excrementihominis
Otu00707	47	Bacteria	Firmicutes	Clostridia	Clostridiales	Lachnospiraceae	Fusicatenibacter	saccharivorans
Otu00708	47	Bacteria	Firmicutes	Negativicutes	Veillonellales	Veillonellaceae	Dialister	invisus
Otu00709	47	Bacteria	Firmicutes	Clostridia	Clostridiales	Lachnospiraceae	Fusicatenibacter	saccharivorans
Otu00710	47	Bacteria	Bacteroidetes	Bacteroidia	Bacteroidales	Prevotellaceae	Prevotella	stercorea
Otu00711	47	Bacteria	Firmicutes	Clostridia	Clostridiales	Ruminococcaceae	Fournierella	Fournierella_unclassified
Otu00712	47	Bacteria	Firmicutes	Clostridia	Clostridiales	Lachnospiraceae	Lachnospiraceae_unclassified	Lachnospiraceae_unclassified
Otu00713	47	Bacteria	Firmicutes	Clostridia	Clostridiales	Ruminococcaceae	Faecalibacterium	prausnitzii
Otu00714	47	Bacteria	Firmicutes	Clostridia	Clostridiales	Lachnospiraceae	Coprococcus	eutactus
Otu00715	47	Bacteria	Firmicutes	Clostridia	Clostridiales	Lachnospiraceae	Blautia	Blautia_unclassified
Otu00716	47	Archaea	Euryarchaeota	Methanobacteria	Methanobacteriales	Methanobacteriaceae	Methanobrevibacter	Methanobrevibacter_unclassified
Otu00717	47	Bacteria	Firmicutes	Firmicutes_unclassified	Firmicutes_unclassified	Firmicutes_unclassified	Firmicutes_unclassified	Firmicutes_unclassified
Otu00718	46	Bacteria	Firmicutes	Clostridia	Clostridiales	Lachnospiraceae	Blautia	obeum
Otu00719	46	Bacteria	Actinobacteria	Actinobacteria	Bifidobacteriales	Bifidobacteriaceae	Bifidobacterium	adolescentis
Otu00720	46	Bacteria	Firmicutes	Clostridia	Clostridiales	Lachnospiraceae	Fusicatenibacter	saccharivorans
Otu00721	46	Bacteria	Firmicutes	Clostridia	Clostridiales	Lachnospiraceae	Blautia	obeum
Otu00722	46	Bacteria	Firmicutes	Clostridia	Clostridiales	Lachnospiraceae	Lachnospiraceae_unclassified	Lachnospiraceae_unclassified
Otu00723	46	Bacteria	Firmicutes	Clostridia	Clostridiales	Lachnospiraceae	Fusicatenibacter	saccharivorans
Otu00724	46	Bacteria	Bacteroidetes	Bacteroidia	Bacteroidales	Porphyromonadaceae	Parabacteroides	merdae
Otu00725	46	Bacteria	Firmicutes	Clostridia	Clostridiales	Ruminococcaceae	Oscillibacter	Oscillibacter_unclassified
Otu00726	46	Bacteria	Firmicutes	Clostridia	Clostridiales	Peptostreptococcaceae	Paeniclostridium	sordellii
Otu00727	46	Bacteria	Bacteroidetes	Bacteroidia	Bacteroidales	Bacteroidaceae	Phocaeicola	vulgatus
Otu00728	46	Bacteria	Bacteroidetes	Bacteroidia	Bacteroidales	Bacteroidaceae	Bacteroides	Bacteroides_unclassified
Otu00729	45	Bacteria	Bacteroidetes	Bacteroidia	Bacteroidales	Bacteroidaceae	Phocaeicola	vulgatus
Otu00730	45	Bacteria	Firmicutes	Clostridia	Clostridiales	Ruminococcaceae	Faecalibacterium	prausnitzii
Otu00731	45	Bacteria	Firmicutes	Clostridia	Clostridiales	Lachnospiraceae	Blautia	luti
Otu00732	45	Bacteria	Firmicutes	Clostridia	Clostridiales	Clostridiales_unclassified	Clostridiales_unclassified	Clostridiales_unclassified
Otu00733	45	Bacteria	Firmicutes	Clostridia	Clostridiales	Ruminococcaceae	Faecalibacterium	prausnitzii
Otu00734	45	Archaea	Euryarchaeota	Methanobacteria	Methanobacteriales	Methanobacteriaceae	Methanobrevibacter	Methanobrevibacter_unclassified
Otu00735	45	Bacteria	Bacteroidetes	Bacteroidia	Bacteroidales	Bacteroidaceae	Phocaeicola	vulgatus
Otu00736	45	Bacteria	Bacteroidetes	Bacteroidia	Bacteroidales	Bacteroidaceae	Phocaeicola	vulgatus
Otu00737	45	Bacteria	Firmicutes	Clostridia	Clostridiales	Ruminococcaceae	Colidextribacter	Colidextribacter_unclassified
Otu00738	45	Bacteria	Bacteroidetes	Bacteroidia	Bacteroidales	Odoribacteraceae	Butyricimonas	Butyricimonas_unclassified
Otu00739	45	Bacteria	Bacteroidetes	Bacteroidia	Bacteroidales	Bacteroidaceae	Phocaeicola	vulgatus
Otu00740	44	Bacteria	Firmicutes	Clostridia	Clostridiales	Lachnospiraceae	Blautia	Blautia_unclassified
Otu00741	44	Bacteria	Firmicutes	Negativicutes	Veillonellales	Veillonellaceae	Dialister	succinatiphilus
Otu00742	44	Bacteria	Firmicutes	Clostridia	Clostridiales	Clostridiales_unclassified	Clostridiales_unclassified	Clostridiales_unclassified
Otu00743	44	Bacteria	Proteobacteria	Alphaproteobacteria	Sphingomonadales	Sphingomonadaceae	Sphingomonas	azotifigens
Otu00744	44	Bacteria	Firmicutes	Clostridia	Clostridiales	Clostridiales_Incertae Sedis XIII	Clostridiales_Incertae Sedis XIII_unclassified	Clostridiales_Incertae Sedis XIII_unclassified
Otu00745	44	Bacteria	Firmicutes	Clostridia	Clostridiales	Ruminococcaceae	Faecalibacterium	prausnitzii
Otu00746	44	Bacteria	Firmicutes	Clostridia	Clostridiales	Lachnospiraceae	Blautia	wexlerae
Otu00747	44	Bacteria	Firmicutes	Clostridia	Clostridiales	Lachnospiraceae	Lactonifactor	longoviformis
Otu00748	44	Bacteria	Firmicutes	Clostridia	Clostridiales	Lachnospiraceae	Anaerobutyricum	Anaerobutyricum_unclassified
Otu00749	44	Bacteria	Actinobacteria	Coriobacteriia	Coriobacteriales	Coriobacteriaceae	Collinsella	aerofaciens
Otu00750	44	Bacteria	Bacteroidetes	Bacteroidia	Bacteroidales	Porphyromonadaceae	Parabacteroides	distasonis
Otu00751	43	Bacteria	Actinobacteria	Actinobacteria	Bifidobacteriales	Bifidobacteriaceae	Bifidobacterium	Bifidobacterium_unclassified
Otu00752	43	Bacteria	Actinobacteria	Actinobacteria	Actinomycetales	Actinomycetaceae	Actinomyces	oris
Otu00753	43	Bacteria	Bacteroidetes	Bacteroidia	Bacteroidales	Bacteroidaceae	Bacteroides	Bacteroides_unclassified
Otu00754	43	Bacteria	Bacteroidetes	Bacteroidia	Bacteroidales	Bacteroidaceae	Phocaeicola	vulgatus
Otu00755	43	Bacteria	Bacteroidetes	Bacteroidia	Bacteroidales	Bacteroidaceae	Phocaeicola	vulgatus
Otu00756	43	Bacteria	Proteobacteria	Deltaproteobacteria	Desulfovibrionales	Desulfovibrionaceae	Bilophila	wadsworthia
Otu00757	43	Bacteria	Bacteroidetes	Bacteroidia	Bacteroidales	Bacteroidaceae	Phocaeicola	vulgatus
Otu00758	43	Bacteria	Firmicutes	Clostridia	Clostridiales	Clostridiales_unclassified	Clostridiales_unclassified	Clostridiales_unclassified
Otu00759	43	Bacteria	Firmicutes	Clostridia	Clostridiales	Clostridiales_unclassified	Clostridiales_unclassified	Clostridiales_unclassified
Otu00760	43	Bacteria	Firmicutes	Clostridia	Clostridiales	Ruminococcaceae	Ruminococcaceae_unclassified	Ruminococcaceae_unclassified
Otu00761	43	Bacteria	Firmicutes	Clostridia	Clostridiales	Lachnospiraceae	Blautia	Blautia_unclassified
Otu00762	43	Bacteria	Actinobacteria	Coriobacteriia	Coriobacteriales	Coriobacteriaceae	Collinsella	aerofaciens
Otu00763	43	Bacteria	Firmicutes	Clostridia	Clostridiales	Lachnospiraceae	Lachnospiraceae_unclassified	Lachnospiraceae_unclassified
Otu00764	42	Bacteria	Firmicutes	Bacilli	Lactobacillales	Streptococcaceae	Streptococcus	anginosus subsp. null
Otu00765	42	Bacteria	Firmicutes	Erysipelotrichia	Erysipelotrichales	Erysipelotrichaceae	Faecalibacillus	Faecalibacillus_unclassified
Otu00766	42	Bacteria	Firmicutes	Clostridia	Clostridiales	Ruminococcaceae	Ruminococcus	bromii
Otu00767	42	Bacteria	Bacteroidetes	Bacteroidia	Bacteroidales	Bacteroidaceae	Phocaeicola	vulgatus
Otu00768	42	Bacteria	Firmicutes	Clostridia	Clostridiales	Lachnospiraceae	Coprococcus	catus
Otu00769	42	Bacteria	Firmicutes	Clostridia	Clostridiales	Ruminococcaceae	Faecalibacterium	prausnitzii
Otu00770	42	Bacteria	Firmicutes	Clostridia	Clostridiales	Ruminococcaceae	Ruminococcaceae_unclassified	Ruminococcaceae_unclassified
Otu00771	42	Bacteria	Firmicutes	Clostridia	Clostridiales	Lachnospiraceae	Fusicatenibacter	saccharivorans
Otu00772	42	Bacteria	Bacteroidetes	Bacteroidia	Bacteroidales	Bacteroidaceae	Bacteroides	uniformis
Otu00773	42	Bacteria	Firmicutes	Clostridia	Clostridiales	Clostridiales_unclassified	Clostridiales_unclassified	Clostridiales_unclassified
Otu00774	41	Bacteria	Firmicutes	Clostridia	Clostridiales	Ruminococcaceae	Ruminococcus	bromii
Otu00775	41	Bacteria	Firmicutes	Clostridia	Clostridiales	Lachnospiraceae	Agathobacter	Agathobacter_unclassified
Otu00776	41	Bacteria	Firmicutes	Clostridia	Clostridiales	Ruminococcaceae	Ruminococcaceae_unclassified	Ruminococcaceae_unclassified
Otu00777	41	Bacteria	Firmicutes	Clostridia	Clostridiales	Ruminococcaceae	Ruminococcaceae_unclassified	Ruminococcaceae_unclassified
Otu00778	41	Bacteria	Actinobacteria	Actinobacteria	Bifidobacteriales	Bifidobacteriaceae	Bifidobacterium	Bifidobacterium_unclassified
Otu00779	41	Bacteria	Bacteroidetes	Bacteroidia	Bacteroidales	Bacteroidaceae	Phocaeicola	vulgatus
Otu00780	41	Bacteria	Firmicutes	Clostridia	Clostridiales	Ruminococcaceae	Sporobacter	termitidis
Otu00781	41	Bacteria	Firmicutes	Clostridia	Clostridiales	Ruminococcaceae	Colidextribacter	Colidextribacter_unclassified
Otu00782	41	Bacteria	Bacteroidetes	Bacteroidia	Bacteroidales	Rikenellaceae	Alistipes	putredinis
Otu00783	40	Bacteria	Firmicutes	Clostridia	Clostridiales	Ruminococcaceae	Ruminococcus	bromii
Otu00784	40	Bacteria	Firmicutes	Clostridia	Clostridiales	Lachnospiraceae	Anaerobutyricum	Anaerobutyricum_unclassified
Otu00785	40	Bacteria	Firmicutes	Clostridia	Clostridiales	Peptostreptococcaceae	Peptostreptococcaceae_unclassified	Peptostreptococcaceae_unclassified
Otu00786	40	Bacteria	Firmicutes	Clostridia	Clostridiales	Ruminococcaceae	Ruminococcaceae_unclassified	Ruminococcaceae_unclassified
Otu00787	40	Bacteria	Bacteroidetes	Bacteroidia	Bacteroidales	Bacteroidaceae	Bacteroides	Bacteroides_unclassified
Otu00788	40	Bacteria	Bacteroidetes	Bacteroidia	Bacteroidales	Bacteroidaceae	Phocaeicola	vulgatus
Otu00789	40	Bacteria	Firmicutes	Clostridia	Clostridiales	Lachnospiraceae	Blautia	luti
Otu00790	40	Bacteria	Bacteroidetes	Bacteroidia	Bacteroidales	Bacteroidaceae	Bacteroides	Bacteroides_unclassified
Otu00791	40	Bacteria	Firmicutes	Clostridia	Clostridiales	Lachnospiraceae	Blautia	Blautia_unclassified
Otu00792	40	Bacteria	Bacteroidetes	Bacteroidia	Bacteroidales	Bacteroidaceae	Phocaeicola	vulgatus
Otu00793	40	Bacteria	Bacteroidetes	Bacteroidia	Bacteroidales	Bacteroidaceae	Phocaeicola	vulgatus
Otu00794	40	Bacteria	Firmicutes	Clostridia	Clostridiales	Ruminococcaceae	Ruminococcaceae_unclassified	Ruminococcaceae_unclassified
Otu00795	40	Bacteria	Actinobacteria	Actinobacteria	Bifidobacteriales	Bifidobacteriaceae	Bifidobacterium	adolescentis
Otu00796	40	Bacteria	Firmicutes	Clostridia	Clostridiales	Lachnospiraceae	Coprococcus	comes
Otu00797	40	Bacteria	Firmicutes	Clostridia	Clostridiales	Lachnospiraceae	Lachnospiraceae_unclassified	Lachnospiraceae_unclassified
Otu00798	40	Bacteria	Firmicutes	Clostridia	Clostridiales	Lachnospiraceae	Anaerobutyricum	Anaerobutyricum_unclassified
Otu00799	39	Bacteria	Actinobacteria	Actinobacteria	Bifidobacteriales	Bifidobacteriaceae	Bifidobacterium	Bifidobacterium_unclassified
Otu00800	39	Bacteria	Firmicutes	Clostridia	Clostridiales	Ruminococcaceae	Faecalibacterium	prausnitzii
Otu00801	39	Bacteria	Firmicutes	Clostridia	Clostridiales	Ruminococcaceae	Ruminococcaceae_unclassified	Ruminococcaceae_unclassified
Otu00802	39	Bacteria	Firmicutes	Clostridia	Clostridiales	Lachnospiraceae	Blautia	Blautia_unclassified
Otu00803	39	Bacteria	Firmicutes	Clostridia	Clostridiales	Lachnospiraceae	Lachnospiraceae_unclassified	Lachnospiraceae_unclassified
Otu00804	39	Bacteria	Firmicutes	Clostridia	Clostridiales	Lachnospiraceae	Blautia	wexlerae
Otu00805	39	Bacteria	Bacteroidetes	Bacteroidia	Bacteroidales	Bacteroidaceae	Phocaeicola	vulgatus
Otu00806	39	Bacteria	Firmicutes	Clostridia	Clostridiales	Ruminococcaceae	Ruminococcus	bromii
Otu00807	39	Bacteria	Firmicutes	Clostridia	Clostridiales	Lachnospiraceae	Lachnospiraceae_unclassified	Lachnospiraceae_unclassified
Otu00808	39	Bacteria	Actinobacteria	Actinobacteria	Bifidobacteriales	Bifidobacteriaceae	Bifidobacterium	Bifidobacterium_unclassified
Otu00809	39	Bacteria	Bacteroidetes	Bacteroidia	Bacteroidales	Bacteroidaceae	Bacteroides	Bacteroides_unclassified
Otu00810	39	Bacteria	Bacteroidetes	Bacteroidia	Bacteroidales	Bacteroidaceae	Phocaeicola	vulgatus
Otu00811	38	Bacteria	Actinobacteria	Actinobacteria	Bifidobacteriales	Bifidobacteriaceae	Bifidobacterium	Bifidobacterium_unclassified
Otu00812	38	Bacteria	Bacteroidetes	Bacteroidia	Bacteroidales	Bacteroidaceae	Bacteroides	Bacteroides_unclassified
Otu00813	38	Bacteria	Verrucomicrobia	Verrucomicrobiae	Verrucomicrobiales	Akkermansiaceae	Akkermansia	muciniphila
Otu00814	38	Bacteria	Firmicutes	Clostridia	Clostridiales	Lachnospiraceae	Lachnospiraceae_unclassified	Lachnospiraceae_unclassified
Otu00815	38	Bacteria	Firmicutes	Clostridia	Clostridiales	Ruminococcaceae	Ruminococcus	bromii
Otu00816	38	Bacteria	Firmicutes	Clostridia	Clostridiales	Lachnospiraceae	Blautia	Blautia_unclassified
Otu00817	38	Bacteria	Firmicutes	Clostridia	Clostridiales	Eubacteriaceae	Anaerofustis	stercorihominis
Otu00818	38	Bacteria	Bacteroidetes	Bacteroidia	Bacteroidales	Bacteroidaceae	Bacteroides	Bacteroides_unclassified
Otu00819	38	Bacteria	Actinobacteria	Actinobacteria	Bifidobacteriales	Bifidobacteriaceae	Bifidobacterium	Bifidobacterium_unclassified
Otu00820	38	Bacteria	Firmicutes	Clostridia	Clostridiales	Ruminococcaceae	Ruminococcaceae_unclassified	Ruminococcaceae_unclassified
Otu00821	38	Bacteria	Firmicutes	Clostridia	Clostridiales	Lachnospiraceae	Blautia	luti
Otu00822	38	Bacteria	Firmicutes	Clostridia	Clostridiales	Lachnospiraceae	Lachnospiraceae_unclassified	Lachnospiraceae_unclassified
Otu00823	38	Bacteria	Actinobacteria	Actinobacteria	Bifidobacteriales	Bifidobacteriaceae	Bifidobacterium	adolescentis
Otu00824	38	Bacteria	Firmicutes	Clostridia	Clostridiales	Lachnospiraceae	Lachnospiraceae_unclassified	Lachnospiraceae_unclassified
Otu00825	38	Bacteria	Firmicutes	Clostridia	Clostridiales	Lachnospiraceae	Lachnospiraceae_unclassified	Lachnospiraceae_unclassified
Otu00826	37	Bacteria	Proteobacteria	Gammaproteobacteria	Enterobacterales	Enterobacteriaceae	Enterobacteriaceae_unclassified	Enterobacteriaceae_unclassified
Otu00827	37	Bacteria	Bacteroidetes	Bacteroidia	Bacteroidales	Bacteroidaceae	Phocaeicola	vulgatus
Otu00828	37	Bacteria	Bacteroidetes	Bacteroidia	Bacteroidales	Prevotellaceae	Prevotella	stercorea
Otu00829	37	Bacteria	Firmicutes	Clostridia	Clostridiales	Ruminococcaceae	Faecalibacterium	prausnitzii
Otu00830	37	Bacteria	Firmicutes	Clostridia	Clostridiales	Ruminococcaceae	Faecalibacterium	prausnitzii
Otu00831	37	Bacteria	Firmicutes	Clostridia	Clostridiales	Lachnospiraceae	Blautia	Blautia_unclassified
Otu00832	37	Bacteria	Actinobacteria	Coriobacteriia	Eggerthellales	Eggerthellaceae	Eggerthellaceae_unclassified	Eggerthellaceae_unclassified
Otu00833	37	Bacteria	Firmicutes	Clostridia	Clostridiales	Lachnospiraceae	Dorea	longicatena
Otu00834	37	Bacteria	Bacteroidetes	Bacteroidia	Bacteroidales	Bacteroidaceae	Phocaeicola	vulgatus
Otu00835	37	Bacteria	Firmicutes	Clostridia	Clostridiales	Clostridiales_unclassified	Clostridiales_unclassified	Clostridiales_unclassified
Otu00836	37	Bacteria	Firmicutes	Clostridia	Clostridiales	Lachnospiraceae	Blautia	obeum
Otu00837	37	Bacteria	Firmicutes	Clostridia	Clostridiales	Lachnospiraceae	Agathobacter	Agathobacter_unclassified
Otu00838	37	Bacteria	Firmicutes	Clostridia	Clostridiales	Lachnospiraceae	Dorea	longicatena
Otu00839	37	Bacteria	Bacteroidetes	Bacteroidia	Bacteroidales	Muribaculaceae	Muribaculaceae_unclassified	Muribaculaceae_unclassified
Otu00840	37	Bacteria	Firmicutes	Clostridia	Clostridiales	Ruminococcaceae	Ruminococcaceae_unclassified	Ruminococcaceae_unclassified
Otu00841	37	Bacteria	Bacteroidetes	Bacteroidia	Bacteroidales	Bacteroidaceae	Phocaeicola	vulgatus
Otu00842	37	Bacteria	Actinobacteria	Actinobacteria	Bifidobacteriales	Bifidobacteriaceae	Bifidobacterium	Bifidobacterium_unclassified
Otu00843	36	Bacteria	Bacteroidetes	Bacteroidia	Bacteroidales	Bacteroidaceae	Bacteroides	Bacteroides_unclassified
Otu00844	36	Bacteria	Bacteroidetes	Bacteroidia	Bacteroidales	Bacteroidaceae	Bacteroides	Bacteroides_unclassified
Otu00845	36	Bacteria	Firmicutes	Clostridia	Clostridiales	Lachnospiraceae	Cuneatibacter	Cuneatibacter_unclassified
Otu00846	36	Bacteria	Firmicutes	Clostridia	Clostridiales	Lachnospiraceae	Blautia	Blautia_unclassified
Otu00847	36	Bacteria	Firmicutes	Clostridia	Clostridiales	Lachnospiraceae	Coprococcus	comes
Otu00848	36	Bacteria	Bacteroidetes	Bacteroidia	Bacteroidales	Porphyromonadaceae	Parabacteroides	merdae
Otu00849	36	Bacteria	Proteobacteria	Betaproteobacteria	Burkholderiales	Sutterellaceae	Sutterella	wadsworthensis
Otu00850	36	Bacteria	Firmicutes	Clostridia	Clostridiales	Lachnospiraceae	Fusicatenibacter	saccharivorans
Otu00851	36	Bacteria	Bacteroidetes	Bacteroidia	Bacteroidales	Bacteroidaceae	Bacteroides	Bacteroides_unclassified
Otu00852	36	Bacteria	Firmicutes	Clostridia	Clostridiales	Lachnospiraceae	Anaerobutyricum	Anaerobutyricum_unclassified
Otu00853	36	Bacteria	Bacteria_unclassified	Bacteria_unclassified	Bacteria_unclassified	Bacteria_unclassified	Bacteria_unclassified	Bacteria_unclassified
Otu00854	36	Bacteria	Bacteroidetes	Bacteroidia	Bacteroidales	Porphyromonadaceae	Parabacteroides	merdae
Otu00855	36	Bacteria	Firmicutes	Negativicutes	Acidaminococcales	Acidaminococcaceae	Phascolarctobacterium	faecium
Otu00856	36	Bacteria	Firmicutes	Clostridia	Clostridiales	Lachnospiraceae	Fusicatenibacter	saccharivorans
Otu00857	36	Bacteria	Firmicutes	Clostridia	Clostridiales	Lachnospiraceae	Lachnospiraceae_unclassified	Lachnospiraceae_unclassified
Otu00858	36	Bacteria	Firmicutes	Clostridia	Clostridia_unclassified	Clostridia_unclassified	Clostridia_unclassified	Clostridia_unclassified
Otu00859	36	Bacteria	Firmicutes	Clostridia	Clostridiales	Ruminococcaceae	Ruminococcus	bromii
Otu00860	36	Bacteria	Firmicutes	Clostridia	Clostridiales	Ruminococcaceae	Ruminococcaceae_unclassified	Ruminococcaceae_unclassified
Otu00861	36	Bacteria	Bacteroidetes	Bacteroidia	Bacteroidales	Bacteroidaceae	Phocaeicola	vulgatus
Otu00862	35	Bacteria	Proteobacteria	Betaproteobacteria	Burkholderiales	Sutterellaceae	Sutterella	wadsworthensis
Otu00863	35	Bacteria	Firmicutes	Clostridia	Clostridiales	Ruminococcaceae	Oscillibacter	Oscillibacter_unclassified
Otu00864	35	Bacteria	Firmicutes	Clostridia	Clostridiales	Ruminococcaceae	Ruminococcus	bromii
Otu00865	35	Bacteria	Proteobacteria	Gammaproteobacteria	Enterobacterales	Enterobacteriaceae	Enterobacteriaceae_unclassified	Enterobacteriaceae_unclassified
Otu00866	35	Bacteria	Firmicutes	Clostridia	Clostridiales	Ruminococcaceae	Ruminococcaceae_unclassified	Ruminococcaceae_unclassified
Otu00867	35	Bacteria	Firmicutes	Clostridia	Clostridiales	Clostridiales_unclassified	Clostridiales_unclassified	Clostridiales_unclassified
Otu00868	35	Bacteria	Firmicutes	Clostridia	Clostridiales	Ruminococcaceae	Faecalibacterium	prausnitzii
Otu00869	35	Bacteria	Firmicutes	Clostridia	Clostridiales	Ruminococcaceae	Ruminococcaceae_unclassified	Ruminococcaceae_unclassified
Otu00870	35	Bacteria	Firmicutes	Clostridia	Clostridiales	Lachnospiraceae	Coprococcus	catus
Otu00871	35	Bacteria	Firmicutes	Clostridia	Clostridiales	Lachnospiraceae	Fusicatenibacter	saccharivorans
Otu00872	35	Bacteria	Firmicutes	Clostridia	Clostridiales	Ruminococcaceae	Ruminococcaceae_unclassified	Ruminococcaceae_unclassified
Otu00873	35	Bacteria	Bacteroidetes	Bacteroidia	Bacteroidales	Bacteroidaceae	Bacteroides	Bacteroides_unclassified
Otu00874	35	Archaea	Euryarchaeota	Methanobacteria	Methanobacteriales	Methanobacteriaceae	Methanobrevibacter	Methanobrevibacter_unclassified
Otu00875	35	Bacteria	Firmicutes	Clostridia	Clostridiales	Lachnospiraceae	Blautia	Blautia_unclassified
Otu00876	35	Bacteria	Bacteroidetes	Bacteroidia	Bacteroidales	Bacteroidaceae	Phocaeicola	vulgatus
Otu00877	34	Bacteria	Firmicutes	Clostridia	Clostridiales	Lachnospiraceae	Lachnospiraceae_unclassified	Lachnospiraceae_unclassified
Otu00878	34	Bacteria	Bacteroidetes	Bacteroidia	Bacteroidales	Bacteroidaceae	Bacteroides	Bacteroides_unclassified
Otu00879	34	Bacteria	Actinobacteria	Actinobacteria	Bifidobacteriales	Bifidobacteriaceae	Bifidobacterium	Bifidobacterium_unclassified
Otu00880	34	Bacteria	Proteobacteria	Betaproteobacteria	Burkholderiales	Sutterellaceae	Sutterella	wadsworthensis
Otu00881	34	Bacteria	Firmicutes	Clostridia	Clostridiales	Ruminococcaceae	Ruminococcaceae_unclassified	Ruminococcaceae_unclassified
Otu00882	34	Bacteria	Firmicutes	Bacilli	Lactobacillales	Streptococcaceae	Streptococcus	Streptococcus_unclassified
Otu00883	34	Bacteria	Actinobacteria	Coriobacteriia	Coriobacteriales	Coriobacteriaceae	Collinsella	aerofaciens
Otu00884	34	Bacteria	Firmicutes	Clostridia	Clostridiales	Ruminococcaceae	Ruminococcaceae_unclassified	Ruminococcaceae_unclassified
Otu00885	34	Bacteria	Firmicutes	Clostridia	Clostridiales	Lachnospiraceae	Blautia	Blautia_unclassified
Otu00886	34	Bacteria	Proteobacteria	Gammaproteobacteria	Enterobacterales	Enterobacteriaceae	Enterobacteriaceae_unclassified	Enterobacteriaceae_unclassified
Otu00887	34	Bacteria	Firmicutes	Clostridia	Clostridiales	Lachnospiraceae	Fusicatenibacter	saccharivorans
Otu00888	34	Bacteria	Firmicutes	Erysipelotrichia	Erysipelotrichales	Erysipelotrichaceae	Erysipelotrichaceae_unclassified	Erysipelotrichaceae_unclassified
Otu00889	34	Bacteria	Actinobacteria	Actinobacteria	Bifidobacteriales	Bifidobacteriaceae	Bifidobacterium	Bifidobacterium_unclassified
Otu00890	34	Bacteria	Firmicutes	Clostridia	Clostridiales	Lachnospiraceae	Fusicatenibacter	saccharivorans
Otu00891	34	Bacteria	Bacteroidetes	Bacteroidia	Bacteroidales	Bacteroidaceae	Phocaeicola	Phocaeicola_unclassified
Otu00892	34	Bacteria	Bacteroidetes	Bacteroidia	Bacteroidales	Bacteroidaceae	Bacteroides	Bacteroides_unclassified
Otu00893	34	Bacteria	Actinobacteria	Actinobacteria	Bifidobacteriales	Bifidobacteriaceae	Bifidobacterium	Bifidobacterium_unclassified
Otu00894	34	Bacteria	Firmicutes	Clostridia	Clostridiales	Lachnospiraceae	Fusicatenibacter	saccharivorans
Otu00895	34	Bacteria	Actinobacteria	Actinobacteria	Bifidobacteriales	Bifidobacteriaceae	Bifidobacterium	Bifidobacterium_unclassified
Otu00896	34	Bacteria	Firmicutes	Clostridia	Clostridiales	Lachnospiraceae	Dorea	longicatena
Otu00897	34	Bacteria	Firmicutes	Clostridia	Clostridiales	Ruminococcaceae	Ruminococcaceae_unclassified	Ruminococcaceae_unclassified
Otu00898	34	Bacteria	Actinobacteria	Actinobacteria	Bifidobacteriales	Bifidobacteriaceae	Bifidobacterium	Bifidobacterium_unclassified
Otu00899	34	Bacteria	Firmicutes	Clostridia	Clostridiales	Ruminococcaceae	Flintibacter	Flintibacter_unclassified
Otu00900	34	Bacteria	Bacteroidetes	Bacteroidia	Bacteroidales	Bacteroidaceae	Bacteroides	Bacteroides_unclassified
Otu00901	34	Bacteria	Bacteroidetes	Bacteroidia	Bacteroidales	Bacteroidaceae	Bacteroides	Bacteroides_unclassified
Otu00902	33	Bacteria	Firmicutes	Clostridia	Clostridiales	Ruminococcaceae	Faecalibacterium	prausnitzii
Otu00903	33	Bacteria	Bacteroidetes	Bacteroidia	Bacteroidales	Bacteroidaceae	Bacteroides	uniformis
Otu00904	33	Bacteria	Bacteroidetes	Bacteroidia	Bacteroidales	Bacteroidaceae	Bacteroides	ovatus
Otu00905	33	Bacteria	Firmicutes	Clostridia	Clostridiales	Clostridiales_unclassified	Clostridiales_unclassified	Clostridiales_unclassified
Otu00906	33	Bacteria	Firmicutes	Clostridia	Clostridiales	Lachnospiraceae	Blautia	Blautia_unclassified
Otu00907	33	Bacteria	Bacteroidetes	Bacteroidia	Bacteroidales	Bacteroidaceae	Bacteroides	Bacteroides_unclassified
Otu00908	33	Bacteria	Bacteria_unclassified	Bacteria_unclassified	Bacteria_unclassified	Bacteria_unclassified	Bacteria_unclassified	Bacteria_unclassified
Otu00909	33	Bacteria	Bacteroidetes	Bacteroidia	Bacteroidales	Bacteroidaceae	Bacteroides	ovatus
Otu00910	33	Bacteria	Firmicutes	Clostridia	Clostridiales	Ruminococcaceae	Ruminococcaceae_unclassified	Ruminococcaceae_unclassified
Otu00911	33	Bacteria	Firmicutes	Clostridia	Clostridiales	Ruminococcaceae	Ruminococcaceae_unclassified	Ruminococcaceae_unclassified
Otu00912	33	Bacteria	Firmicutes	Negativicutes	Acidaminococcales	Acidaminococcaceae	Phascolarctobacterium	faecium
Otu00913	33	Bacteria	Firmicutes	Clostridia	Clostridiales	Lachnospiraceae	Blautia	Blautia_unclassified
Otu00914	33	Bacteria	Firmicutes	Clostridia	Clostridiales	Clostridiales_unclassified	Clostridiales_unclassified	Clostridiales_unclassified
Otu00915	33	Bacteria	Actinobacteria	Actinobacteria	Bifidobacteriales	Bifidobacteriaceae	Bifidobacterium	adolescentis
Otu00916	32	Bacteria	Firmicutes	Clostridia	Clostridiales	Lachnospiraceae	Anaerobutyricum	Anaerobutyricum_unclassified
Otu00917	32	Bacteria	Bacteroidetes	Bacteroidia	Bacteroidales	Bacteroidaceae	Bacteroides	uniformis
Otu00918	32	Bacteria	Actinobacteria	Actinobacteria	Bifidobacteriales	Bifidobacteriaceae	Bifidobacterium	Bifidobacterium_unclassified
Otu00919	32	Bacteria	Firmicutes	Firmicutes_unclassified	Firmicutes_unclassified	Firmicutes_unclassified	Firmicutes_unclassified	Firmicutes_unclassified
Otu00920	32	Bacteria	Firmicutes	Clostridia	Clostridiales	Ruminococcaceae	Ruminococcaceae_unclassified	Ruminococcaceae_unclassified
Otu00921	32	Bacteria	Firmicutes	Clostridia	Clostridiales	Lachnospiraceae	Coprococcus	catus
Otu00922	32	Bacteria	Bacteroidetes	Bacteroidia	Bacteroidales	Bacteroidaceae	Bacteroides	uniformis
Otu00923	32	Bacteria	Firmicutes	Clostridia	Clostridia_unclassified	Clostridia_unclassified	Clostridia_unclassified	Clostridia_unclassified
Otu00924	32	Bacteria	Actinobacteria	Coriobacteriia	Eggerthellales	Eggerthellaceae	Raoultibacter	Raoultibacter_unclassified
Otu00925	32	Bacteria	Firmicutes	Clostridia	Clostridiales	Lachnospiraceae	Lachnospiraceae_unclassified	Lachnospiraceae_unclassified
Otu00926	32	Bacteria	Bacteroidetes	Bacteroidia	Bacteroidales	Bacteroidaceae	Phocaeicola	vulgatus
Otu00927	32	Bacteria	Firmicutes	Clostridia	Clostridiales	Lachnospiraceae	Mediterraneibacter	Mediterraneibacter_unclassified
Otu00928	32	Bacteria	Firmicutes	Clostridia	Clostridiales	Lachnospiraceae	Blautia	wexlerae
Otu00929	32	Bacteria	Bacteroidetes	Bacteroidia	Bacteroidales	Bacteroidaceae	Bacteroides	thetaiotaomicron VPI-5482
Otu00930	32	Bacteria	Firmicutes	Clostridia	Clostridiales	Lachnospiraceae	Fusicatenibacter	saccharivorans
Otu00931	32	Bacteria	Firmicutes	Clostridia	Clostridiales	Ruminococcaceae	Ruminococcus	Ruminococcus_unclassified
Otu00932	31	Bacteria	Actinobacteria	Coriobacteriia	Coriobacteriales	Coriobacteriaceae	Collinsella	aerofaciens
Otu00933	31	Bacteria	Firmicutes	Clostridia	Clostridiales	Lachnospiraceae	Blautia	Blautia_unclassified
Otu00934	31	Bacteria	Firmicutes	Negativicutes	Veillonellales	Veillonellaceae	Dialister	invisus
Otu00935	31	Bacteria	Proteobacteria	Betaproteobacteria	Burkholderiales	Sutterellaceae	Sutterella	wadsworthensis
Otu00936	31	Bacteria	Bacteroidetes	Bacteroidia	Bacteroidales	Bacteroidaceae	Phocaeicola	vulgatus
Otu00937	31	Bacteria	Firmicutes	Clostridia	Clostridiales	Ruminococcaceae	Ruminococcaceae_unclassified	Ruminococcaceae_unclassified
Otu00938	31	Bacteria	Actinobacteria	Actinobacteria	Bifidobacteriales	Bifidobacteriaceae	Bifidobacterium	Bifidobacterium_unclassified
Otu00939	31	Bacteria	Bacteroidetes	Bacteroidia	Bacteroidales	Bacteroidaceae	Bacteroides	Bacteroides_unclassified
Otu00940	31	Bacteria	Firmicutes	Firmicutes_unclassified	Firmicutes_unclassified	Firmicutes_unclassified	Firmicutes_unclassified	Firmicutes_unclassified
Otu00941	31	Bacteria	Firmicutes	Clostridia	Clostridiales	Lachnospiraceae	Lachnospiraceae_unclassified	Lachnospiraceae_unclassified
Otu00942	31	Bacteria	Bacteroidetes	Bacteroidia	Bacteroidales	Bacteroidaceae	Bacteroides	uniformis
Otu00943	31	Bacteria	Bacteroidetes	Bacteroidia	Bacteroidales	Bacteroidaceae	Phocaeicola	vulgatus
Otu00944	31	Bacteria	Firmicutes	Clostridia	Clostridiales	Lachnospiraceae	Lachnospiraceae_unclassified	Lachnospiraceae_unclassified
Otu00945	31	Bacteria	Firmicutes	Clostridia	Clostridiales	Ruminococcaceae	Ruminococcaceae_unclassified	Ruminococcaceae_unclassified
Otu00946	31	Bacteria	Firmicutes	Clostridia	Clostridiales	Ruminococcaceae	Faecalibacterium	prausnitzii
Otu00947	31	Bacteria	Firmicutes	Clostridia	Clostridiales	Lachnospiraceae	Blautia	Blautia_unclassified
Otu00948	31	Bacteria	Bacteroidetes	Bacteroidia	Bacteroidales	Bacteroidaceae	Bacteroidaceae_unclassified	Bacteroidaceae_unclassified
Otu00949	31	Bacteria	Actinobacteria	Coriobacteriia	Coriobacteriales	Coriobacteriaceae	Collinsella	aerofaciens
Otu00950	31	Bacteria	Bacteroidetes	Bacteroidia	Bacteroidales	Porphyromonadaceae	Parabacteroides	distasonis
Otu00951	31	Bacteria	Bacteroidetes	Bacteroidia	Bacteroidales	Bacteroidaceae	Phocaeicola	vulgatus
Otu00952	31	Bacteria	Bacteroidetes	Bacteroidia	Bacteroidales	Bacteroidaceae	Bacteroides	Bacteroides_unclassified
Otu00953	30	Bacteria	Firmicutes	Clostridia	Clostridiales	Ruminococcaceae	Faecalibacterium	prausnitzii
Otu00954	30	Bacteria	Firmicutes	Clostridia	Clostridiales	Ruminococcaceae	Ruminococcaceae_unclassified	Ruminococcaceae_unclassified
Otu00955	30	Bacteria	Proteobacteria	Betaproteobacteria	Burkholderiales	Sutterellaceae	Sutterella	wadsworthensis
Otu00956	30	Bacteria	Firmicutes	Clostridia	Clostridiales	Lachnospiraceae	Blautia	Blautia_unclassified
Otu00957	30	Bacteria	Firmicutes	Clostridia	Clostridiales	Clostridiales_unclassified	Clostridiales_unclassified	Clostridiales_unclassified
Otu00958	30	Bacteria	Firmicutes	Clostridia	Clostridiales	Lachnospiraceae	Lachnospiraceae_unclassified	Lachnospiraceae_unclassified
Otu00959	30	Bacteria	Actinobacteria	Actinobacteria	Bifidobacteriales	Bifidobacteriaceae	Bifidobacterium	Bifidobacterium_unclassified
Otu00960	30	Bacteria	Firmicutes	Clostridia	Clostridiales	Ruminococcaceae	Ruminococcaceae_unclassified	Ruminococcaceae_unclassified
Otu00961	30	Bacteria	Firmicutes	Firmicutes_unclassified	Firmicutes_unclassified	Firmicutes_unclassified	Firmicutes_unclassified	Firmicutes_unclassified
Otu00962	30	Bacteria	Firmicutes	Clostridia	Clostridiales	Lachnospiraceae	Dorea	longicatena
Otu00963	30	Bacteria	Firmicutes	Clostridia	Clostridiales	Ruminococcaceae	Ruminococcaceae_unclassified	Ruminococcaceae_unclassified
Otu00964	30	Bacteria	Firmicutes	Clostridia	Clostridiales	Lachnospiraceae	Coprococcus	comes
Otu00965	30	Bacteria	Firmicutes	Clostridia	Clostridiales	Ruminococcaceae	Ruminococcaceae_unclassified	Ruminococcaceae_unclassified
Otu00966	30	Bacteria	Firmicutes	Clostridia	Clostridiales	Lachnospiraceae	Lachnospiraceae_unclassified	Lachnospiraceae_unclassified
Otu00967	30	Bacteria	Firmicutes	Clostridia	Clostridiales	Ruminococcaceae	Ruminococcus	bromii
Otu00968	29	Bacteria	Bacteroidetes	Bacteroidia	Bacteroidales	Rikenellaceae	Alistipes	obesi
Otu00969	29	Bacteria	Firmicutes	Clostridia	Clostridiales	Lachnospiraceae	Blautia	Blautia_unclassified
Otu00970	29	Bacteria	Firmicutes	Clostridia	Clostridiales	Ruminococcaceae	Ruminococcaceae_unclassified	Ruminococcaceae_unclassified
Otu00971	29	Bacteria	Firmicutes	Clostridia	Clostridiales	Clostridiales_unclassified	Clostridiales_unclassified	Clostridiales_unclassified
Otu00972	29	Bacteria	Firmicutes	Clostridia	Clostridiales	Lachnospiraceae	Lachnospiraceae_unclassified	Lachnospiraceae_unclassified
Otu00973	29	Bacteria	Verrucomicrobia	Verrucomicrobiae	Verrucomicrobiales	Akkermansiaceae	Akkermansia	muciniphila
Otu00974	29	Bacteria	Firmicutes	Clostridia	Clostridiales	Lachnospiraceae	Blautia	Blautia_unclassified
Otu00975	29	Bacteria	Bacteroidetes	Bacteroidia	Bacteroidales	Bacteroidaceae	Bacteroides	uniformis
Otu00976	29	Bacteria	Firmicutes	Clostridia	Clostridiales	Ruminococcaceae	Ruminococcaceae_unclassified	Ruminococcaceae_unclassified
Otu00977	29	Bacteria	Firmicutes	Clostridia	Clostridiales	Lachnospiraceae	Lachnospiraceae_unclassified	Lachnospiraceae_unclassified
Otu00978	29	Bacteria	Firmicutes	Negativicutes	Veillonellales	Veillonellaceae	Dialister	Dialister_unclassified
Otu00979	29	Bacteria	Firmicutes	Clostridia	Clostridiales	Lachnospiraceae	Fusicatenibacter	saccharivorans
Otu00980	29	Bacteria	Bacteroidetes	Bacteroidia	Bacteroidales	Bacteroidaceae	Phocaeicola	vulgatus
Otu00981	29	Bacteria	Firmicutes	Clostridia	Clostridiales	Ruminococcaceae	Oscillibacter	Oscillibacter_unclassified
Otu00982	28	Bacteria	Firmicutes	Clostridia	Clostridiales	Clostridiales_unclassified	Clostridiales_unclassified	Clostridiales_unclassified
Otu00983	28	Bacteria	Firmicutes	Clostridia	Clostridiales	Lachnospiraceae	Lachnospiraceae_unclassified	Lachnospiraceae_unclassified
Otu00984	28	Bacteria	Firmicutes	Negativicutes	Acidaminococcales	Acidaminococcaceae	Phascolarctobacterium	faecium
Otu00985	28	Bacteria	Firmicutes	Clostridia	Clostridiales	Lachnospiraceae	Lachnospiraceae_unclassified	Lachnospiraceae_unclassified
Otu00986	28	Bacteria	Proteobacteria	Betaproteobacteria	Burkholderiales	Sutterellaceae	Sutterella	wadsworthensis
Otu00987	28	Bacteria	Bacteroidetes	Bacteroidia	Bacteroidales	Bacteroidaceae	Bacteroides	intestinalis
Otu00988	28	Bacteria	Firmicutes	Clostridia	Clostridiales	Lachnospiraceae	Blautia	Blautia_unclassified
Otu00989	28	Bacteria	Bacteroidetes	Bacteroidia	Bacteroidales	Bacteroidaceae	Phocaeicola	vulgatus
Otu00990	28	Bacteria	Proteobacteria	Gammaproteobacteria	Enterobacterales	Enterobacteriaceae	Enterobacteriaceae_unclassified	Enterobacteriaceae_unclassified
Otu00991	28	Bacteria	Firmicutes	Clostridia	Clostridiales	Lachnospiraceae	Fusicatenibacter	saccharivorans
Otu00992	28	Bacteria	Actinobacteria	Actinobacteria	Bifidobacteriales	Bifidobacteriaceae	Bifidobacterium	Bifidobacterium_unclassified
Otu00993	28	Bacteria	Firmicutes	Clostridia	Clostridiales	Lachnospiraceae	Fusicatenibacter	saccharivorans
Otu00994	28	Bacteria	Bacteroidetes	Bacteroidia	Bacteroidales	Rikenellaceae	Alistipes	timonensis
Otu00995	28	Bacteria	Firmicutes	Clostridia	Clostridiales	Ruminococcaceae	Ruminococcaceae_unclassified	Ruminococcaceae_unclassified
Otu00996	28	Bacteria	Bacteroidetes	Bacteroidia	Bacteroidales	Bacteroidaceae	Bacteroides	intestinalis
Otu00997	28	Bacteria	Firmicutes	Clostridia	Clostridiales	Clostridiales_unclassified	Clostridiales_unclassified	Clostridiales_unclassified
Otu00998	28	Bacteria	Actinobacteria	Actinobacteria	Bifidobacteriales	Bifidobacteriaceae	Bifidobacterium	Bifidobacterium_unclassified
Otu00999	28	Bacteria	Bacteroidetes	Bacteroidia	Bacteroidales	Bacteroidaceae	Phocaeicola	vulgatus
Otu01000	28	Bacteria	Bacteroidetes	Bacteroidia	Bacteroidales	Bacteroidaceae	Phocaeicola	vulgatus
Otu01001	28	Bacteria	Firmicutes	Clostridia	Clostridiales	Ruminococcaceae	Faecalibacterium	prausnitzii
Otu01002	28	Bacteria	Firmicutes	Clostridia	Clostridiales	Clostridiales_unclassified	Clostridiales_unclassified	Clostridiales_unclassified
Otu01003	27	Bacteria	Actinobacteria	Actinobacteria	Bifidobacteriales	Bifidobacteriaceae	Bifidobacterium	Bifidobacterium_unclassified
Otu01004	27	Bacteria	Bacteroidetes	Bacteroidia	Bacteroidales	Bacteroidaceae	Bacteroides	Bacteroides_unclassified
Otu01005	27	Bacteria	Bacteroidetes	Bacteroidia	Bacteroidales	Bacteroidaceae	Phocaeicola	vulgatus
Otu01006	27	Bacteria	Firmicutes	Clostridia	Clostridiales	Clostridiales_unclassified	Clostridiales_unclassified	Clostridiales_unclassified
Otu01007	27	Bacteria	Firmicutes	Clostridia	Clostridiales	Ruminococcaceae	Ruminococcaceae_unclassified	Ruminococcaceae_unclassified
Otu01008	27	Bacteria	Firmicutes	Clostridia	Clostridiales	Ruminococcaceae	Ruminococcaceae_unclassified	Ruminococcaceae_unclassified
Otu01009	27	Bacteria	Firmicutes	Clostridia	Clostridiales	Lachnospiraceae	Dorea	longicatena
Otu01010	27	Bacteria	Firmicutes	Clostridia	Clostridiales	Lachnospiraceae	Blautia	Blautia_unclassified
Otu01011	27	Bacteria	Firmicutes	Clostridia	Clostridiales	Lachnospiraceae	Blautia	Blautia_unclassified
Otu01012	27	Bacteria	Actinobacteria	Coriobacteriia	Eggerthellales	Eggerthellaceae	Adlercreutzia	equolifaciens
Otu01013	27	Bacteria	Bacteroidetes	Bacteroidia	Bacteroidales	Bacteroidaceae	Bacteroides	Bacteroides_unclassified
Otu01014	27	Bacteria	Firmicutes	Clostridia	Clostridiales	Ruminococcaceae	Oscillibacter	Oscillibacter_unclassified
Otu01015	27	Bacteria	Bacteroidetes	Bacteroidia	Bacteroidales	Bacteroidaceae	Phocaeicola	vulgatus
Otu01016	27	Bacteria	Firmicutes	Clostridia	Clostridiales	Lachnospiraceae	Blautia	Blautia_unclassified
Otu01017	27	Bacteria	Actinobacteria	Actinobacteria	Bifidobacteriales	Bifidobacteriaceae	Bifidobacterium	Bifidobacterium_unclassified
Otu01018	27	Bacteria	Bacteroidetes	Bacteroidia	Bacteroidales	Bacteroidaceae	Phocaeicola	vulgatus
Otu01019	27	Bacteria	Bacteroidetes	Bacteroidia	Bacteroidales	Bacteroidaceae	Bacteroides	Bacteroides_unclassified
Otu01020	27	Bacteria	Firmicutes	Bacilli	Lactobacillales	Enterococcaceae	Enterococcus	Enterococcus_unclassified
Otu01021	27	Bacteria	Proteobacteria	Betaproteobacteria	Burkholderiales	Sutterellaceae	Parasutterella	excrementihominis
Otu01022	27	Bacteria	Bacteroidetes	Bacteroidia	Bacteroidales	Bacteroidaceae	Bacteroides	Bacteroides_unclassified
Otu01023	27	Bacteria	Bacteroidetes	Bacteroidia	Bacteroidales	Bacteroidaceae	Bacteroides	Bacteroides_unclassified
Otu01024	27	Bacteria	Bacteroidetes	Bacteroidia	Bacteroidales	Bacteroidaceae	Phocaeicola	vulgatus
Otu01025	27	Bacteria	Bacteroidetes	Bacteroidia	Bacteroidales	Bacteroidaceae	Phocaeicola	vulgatus
Otu01026	27	Bacteria	Actinobacteria	Actinobacteria	Bifidobacteriales	Bifidobacteriaceae	Bifidobacterium	adolescentis
Otu01027	27	Bacteria	Bacteroidetes	Bacteroidia	Bacteroidales	Bacteroidaceae	Phocaeicola	vulgatus
Otu01028	27	Bacteria	Firmicutes	Erysipelotrichia	Erysipelotrichales	Erysipelotrichaceae	Turicibacter	sanguinis
Otu01029	26	Bacteria	Bacteroidetes	Bacteroidia	Bacteroidales	Bacteroidaceae	Bacteroides	Bacteroides_unclassified
Otu01030	26	Bacteria	Bacteroidetes	Bacteroidia	Bacteroidales	Bacteroidaceae	Bacteroides	intestinalis
Otu01031	26	Bacteria	Proteobacteria	Alphaproteobacteria	Rhizobiales	Methylobacteriaceae	Methylobacterium	aquaticum
Otu01032	26	Bacteria	Verrucomicrobia	Verrucomicrobiae	Verrucomicrobiales	Akkermansiaceae	Akkermansia	muciniphila
Otu01033	26	Bacteria	Firmicutes	Clostridia	Clostridiales	Ruminococcaceae	Ruminococcaceae_unclassified	Ruminococcaceae_unclassified
Otu01034	26	Bacteria	Firmicutes	Clostridia	Clostridiales	Lachnospiraceae	Blautia	Blautia_unclassified
Otu01035	26	Bacteria	Firmicutes	Clostridia	Clostridiales	Lachnospiraceae	Lachnospiraceae_unclassified	Lachnospiraceae_unclassified
Otu01036	26	Bacteria	Bacteroidetes	Bacteroidia	Bacteroidales	Bacteroidaceae	Bacteroides	Bacteroides_unclassified
Otu01037	26	Bacteria	Bacteroidetes	Bacteroidia	Bacteroidales	Barnesiellaceae	Barnesiella	intestinihominis
Otu01038	26	Bacteria	Firmicutes	Clostridia	Clostridiales	Ruminococcaceae	Ruminococcaceae_unclassified	Ruminococcaceae_unclassified
Otu01039	26	Bacteria	Bacteroidetes	Bacteroidia	Bacteroidales	Bacteroidaceae	Bacteroides	intestinalis
Otu01040	26	Bacteria	Firmicutes	Clostridia	Clostridiales	Peptostreptococcaceae	Clostridioides	difficile
Otu01041	26	Bacteria	Bacteroidetes	Bacteroidia	Bacteroidales	Bacteroidaceae	Bacteroides	intestinalis
Otu01042	26	Bacteria	Firmicutes	Clostridia	Clostridiales	Ruminococcaceae	Ruminococcaceae_unclassified	Ruminococcaceae_unclassified
Otu01043	26	Bacteria	Firmicutes	Clostridia	Clostridiales	Clostridiales_unclassified	Clostridiales_unclassified	Clostridiales_unclassified
Otu01044	26	Bacteria	Bacteroidetes	Bacteroidia	Bacteroidales	Bacteroidaceae	Bacteroides	Bacteroides_unclassified
Otu01045	26	Bacteria	Bacteroidetes	Bacteroidia	Bacteroidales	Bacteroidaceae	Bacteroides	Bacteroides_unclassified
Otu01046	26	Bacteria	Firmicutes	Clostridia	Clostridiales	Clostridiales_unclassified	Clostridiales_unclassified	Clostridiales_unclassified
Otu01047	26	Bacteria	Firmicutes	Clostridia	Clostridiales	Ruminococcaceae	Ruminococcus	bromii
Otu01048	26	Bacteria	Firmicutes	Clostridia	Clostridiales	Lachnospiraceae	Blautia	Blautia_unclassified
Otu01049	26	Bacteria	Bacteroidetes	Bacteroidia	Bacteroidales	Bacteroidaceae	Bacteroides	Bacteroides_unclassified
Otu01050	26	Bacteria	Firmicutes	Clostridia	Clostridiales	Ruminococcaceae	Ruminococcaceae_unclassified	Ruminococcaceae_unclassified
Otu01051	26	Bacteria	Firmicutes	Clostridia	Clostridiales	Ruminococcaceae	Agathobaculum	Agathobaculum_unclassified
Otu01052	26	Archaea	Euryarchaeota	Methanobacteria	Methanobacteriales	Methanobacteriaceae	Methanobrevibacter	Methanobrevibacter_unclassified
Otu01053	26	Bacteria	Firmicutes	Clostridia	Clostridiales	Lachnospiraceae	Lachnospiraceae_unclassified	Lachnospiraceae_unclassified
Otu01054	26	Bacteria	Bacteroidetes	Bacteroidia	Bacteroidales	Porphyromonadaceae	Parabacteroides	distasonis
Otu01055	26	Bacteria	Bacteroidetes	Bacteroidia	Bacteroidales	Bacteroidaceae	Phocaeicola	vulgatus
Otu01056	26	Bacteria	Bacteroidetes	Bacteroidia	Bacteroidales	Bacteroidaceae	Phocaeicola	vulgatus
Otu01057	26	Bacteria	Firmicutes	Clostridia	Clostridiales	Lachnospiraceae	Blautia	Blautia_unclassified
Otu01058	26	Bacteria	Firmicutes	Clostridia	Clostridiales	Clostridiales_unclassified	Clostridiales_unclassified	Clostridiales_unclassified
Otu01059	26	Bacteria	Bacteroidetes	Bacteroidia	Bacteroidales	Bacteroidaceae	Bacteroides	uniformis
Otu01060	26	Bacteria	Firmicutes	Clostridia	Clostridiales	Lachnospiraceae	Fusicatenibacter	saccharivorans
Otu01061	26	Bacteria	Firmicutes	Clostridia	Clostridiales	Ruminococcaceae	Ruminococcaceae_unclassified	Ruminococcaceae_unclassified
Otu01062	26	Bacteria	Firmicutes	Clostridia	Clostridiales	Ruminococcaceae	Ruminococcaceae_unclassified	Ruminococcaceae_unclassified
Otu01063	26	Bacteria	Firmicutes	Clostridia	Clostridiales	Lachnospiraceae	Lachnospiraceae_unclassified	Lachnospiraceae_unclassified
Otu01064	26	Bacteria	Firmicutes	Clostridia	Clostridiales	Lachnospiraceae	Coprococcus	comes
Otu01065	26	Bacteria	Firmicutes	Clostridia	Clostridiales	Lachnospiraceae	Dorea	longicatena
Otu01066	26	Bacteria	Actinobacteria	Actinobacteria	Bifidobacteriales	Bifidobacteriaceae	Bifidobacterium	Bifidobacterium_unclassified
Otu01067	25	Bacteria	Actinobacteria	Coriobacteriia	Eggerthellales	Eggerthellaceae	Enteroscipio	Enteroscipio_unclassified
Otu01068	25	Bacteria	Bacteroidetes	Bacteroidia	Bacteroidales	Bacteroidaceae	Bacteroides	uniformis
Otu01069	25	Bacteria	Firmicutes	Clostridia	Clostridiales	Ruminococcaceae	Faecalibacterium	prausnitzii
Otu01070	25	Bacteria	Firmicutes	Clostridia	Clostridiales	Clostridiales_unclassified	Clostridiales_unclassified	Clostridiales_unclassified
Otu01071	25	Bacteria	Firmicutes	Clostridia	Clostridiales	Ruminococcaceae	Ruminococcaceae_unclassified	Ruminococcaceae_unclassified
Otu01072	25	Bacteria	Proteobacteria	Gammaproteobacteria	Enterobacterales	Enterobacteriaceae	Enterobacteriaceae_unclassified	Enterobacteriaceae_unclassified
Otu01073	25	Bacteria	Firmicutes	Clostridia	Clostridiales	Ruminococcaceae	Faecalibacterium	prausnitzii
Otu01074	25	Bacteria	Bacteroidetes	Bacteroidia	Bacteroidales	Porphyromonadaceae	Parabacteroides	distasonis
Otu01075	25	Bacteria	Firmicutes	Clostridia	Clostridiales	Ruminococcaceae	Ruminococcus	bromii
Otu01076	25	Bacteria	Bacteroidetes	Bacteroidia	Bacteroidales	Bacteroidaceae	Bacteroides	ovatus
Otu01077	25	Bacteria	Bacteroidetes	Bacteroidia	Bacteroidales	Bacteroidaceae	Phocaeicola	vulgatus
Otu01078	25	Bacteria	Firmicutes	Clostridia	Clostridiales	Clostridiales_unclassified	Clostridiales_unclassified	Clostridiales_unclassified
Otu01079	25	Bacteria	Firmicutes	Clostridia	Clostridiales	Ruminococcaceae	Ruminococcus	bromii
Otu01080	25	Bacteria	Actinobacteria	Actinobacteria	Bifidobacteriales	Bifidobacteriaceae	Bifidobacterium	Bifidobacterium_unclassified
Otu01081	25	Bacteria	Bacteroidetes	Bacteroidia	Bacteroidales	Bacteroidaceae	Bacteroides	Bacteroides_unclassified
Otu01082	25	Bacteria	Firmicutes	Clostridia	Clostridiales	Ruminococcaceae	Faecalibacterium	prausnitzii
Otu01083	25	Bacteria	Firmicutes	Clostridia	Clostridiales	Clostridiales_unclassified	Clostridiales_unclassified	Clostridiales_unclassified
Otu01084	25	Bacteria	Firmicutes	Clostridia	Clostridiales	Clostridiales_unclassified	Clostridiales_unclassified	Clostridiales_unclassified
Otu01085	25	Bacteria	Bacteroidetes	Bacteroidetes_unclassified	Bacteroidetes_unclassified	Bacteroidetes_unclassified	Bacteroidetes_unclassified	Bacteroidetes_unclassified
Otu01086	25	Bacteria	Firmicutes	Clostridia	Clostridiales	Ruminococcaceae	Faecalibacterium	prausnitzii
Otu01087	25	Bacteria	Firmicutes	Clostridia	Clostridiales	Lachnospiraceae	Lachnospiraceae_unclassified	Lachnospiraceae_unclassified
Otu01088	25	Bacteria	Actinobacteria	Actinobacteria	Bifidobacteriales	Bifidobacteriaceae	Bifidobacterium	Bifidobacterium_unclassified
Otu01089	25	Bacteria	Bacteroidetes	Bacteroidia	Bacteroidales	Bacteroidaceae	Phocaeicola	vulgatus
Otu01090	25	Bacteria	Bacteroidetes	Bacteroidia	Bacteroidales	Bacteroidaceae	Phocaeicola	vulgatus
Otu01091	25	Bacteria	Bacteroidetes	Bacteroidia	Bacteroidales	Bacteroidaceae	Phocaeicola	vulgatus
Otu01092	25	Bacteria	Bacteria_unclassified	Bacteria_unclassified	Bacteria_unclassified	Bacteria_unclassified	Bacteria_unclassified	Bacteria_unclassified
Otu01093	25	Bacteria	Actinobacteria	Actinobacteria	Bifidobacteriales	Bifidobacteriaceae	Bifidobacterium	Bifidobacterium_unclassified
Otu01094	25	Bacteria	Proteobacteria	Gammaproteobacteria	Enterobacterales	Enterobacteriaceae	Enterobacteriaceae_unclassified	Enterobacteriaceae_unclassified
Otu01095	25	Bacteria	Bacteroidetes	Bacteroidia	Bacteroidales	Bacteroidaceae	Bacteroides	Bacteroides_unclassified
Otu01096	25	Bacteria	Proteobacteria	Gammaproteobacteria	Enterobacterales	Enterobacteriaceae	Enterobacteriaceae_unclassified	Enterobacteriaceae_unclassified
Otu01097	25	Bacteria	Bacteroidetes	Bacteroidia	Bacteroidales	Rikenellaceae	Alistipes	finegoldii
Otu01098	25	Bacteria	Firmicutes	Clostridia	Clostridiales	Lachnospiraceae	Anaerobutyricum	Anaerobutyricum_unclassified
Otu01099	25	Bacteria	Bacteroidetes	Bacteroidia	Bacteroidales	Bacteroidaceae	Phocaeicola	Phocaeicola_unclassified
Otu01100	25	Bacteria	Lentisphaerae	Lentisphaeria	Victivallales	Victivallaceae	Victivallis	vadensis
Otu01101	25	Bacteria	Firmicutes	Clostridia	Clostridiales	Lachnospiraceae	Agathobacter	Agathobacter_unclassified
Otu01102	25	Bacteria	Firmicutes	Clostridia	Clostridiales	Lachnospiraceae	Blautia	luti
Otu01103	24	Bacteria	Bacteroidetes	Bacteroidia	Bacteroidales	Porphyromonadaceae	Parabacteroides	merdae
Otu01104	24	Bacteria	Bacteroidetes	Bacteroidia	Bacteroidales	Bacteroidaceae	Phocaeicola	vulgatus
Otu01105	24	Bacteria	Proteobacteria	Gammaproteobacteria	Enterobacterales	Enterobacteriaceae	Enterobacteriaceae_unclassified	Enterobacteriaceae_unclassified
Otu01106	24	Bacteria	Bacteroidetes	Bacteroidia	Bacteroidales	Bacteroidaceae	Bacteroides	Bacteroides_unclassified
Otu01107	24	Bacteria	Firmicutes	Clostridia	Clostridiales	Ruminococcaceae	Negativibacillus	Negativibacillus_unclassified
Otu01108	24	Bacteria	Actinobacteria	Actinobacteria	Bifidobacteriales	Bifidobacteriaceae	Bifidobacterium	adolescentis
Otu01109	24	Bacteria	Bacteroidetes	Bacteroidia	Bacteroidales	Bacteroidaceae	Bacteroides	uniformis
Otu01110	24	Bacteria	Firmicutes	Clostridia	Clostridiales	Lachnospiraceae	Fusicatenibacter	saccharivorans
Otu01111	24	Bacteria	Bacteroidetes	Bacteroidia	Bacteroidales	Bacteroidaceae	Phocaeicola	vulgatus
Otu01112	24	Bacteria	Firmicutes	Clostridia	Clostridiales	Ruminococcaceae	Ruminococcaceae_unclassified	Ruminococcaceae_unclassified
Otu01113	24	Bacteria	Firmicutes	Clostridia	Clostridiales	Lachnospiraceae	Blautia	wexlerae
Otu01114	24	Bacteria	Firmicutes	Clostridia	Clostridiales	Ruminococcaceae	Faecalibacterium	prausnitzii
Otu01115	24	Bacteria	Firmicutes	Clostridia	Clostridiales	Lachnospiraceae	Lachnospiraceae_unclassified	Lachnospiraceae_unclassified
Otu01116	24	Bacteria	Firmicutes	Clostridia	Clostridiales	Lachnospiraceae	Blautia	Blautia_unclassified
Otu01117	24	Bacteria	Firmicutes	Clostridia	Clostridiales	Ruminococcaceae	Faecalibacterium	prausnitzii
Otu01118	24	Bacteria	Firmicutes	Clostridia	Clostridiales	Ruminococcaceae	Faecalibacterium	prausnitzii
Otu01119	24	Bacteria	Firmicutes	Clostridia	Clostridiales	Ruminococcaceae	Faecalibacterium	prausnitzii
Otu01120	24	Bacteria	Firmicutes	Clostridia	Clostridiales	Ruminococcaceae	Ruminococcaceae_unclassified	Ruminococcaceae_unclassified
Otu01121	24	Bacteria	Firmicutes	Clostridia	Clostridiales	Clostridiales_unclassified	Clostridiales_unclassified	Clostridiales_unclassified
Otu01122	24	Bacteria	Firmicutes	Clostridia	Clostridiales	Lachnospiraceae	Anaerotignum	Anaerotignum_unclassified
Otu01123	24	Bacteria	Firmicutes	Negativicutes	Veillonellales	Veillonellaceae	Dialister	succinatiphilus
Otu01124	24	Bacteria	Actinobacteria	Coriobacteriia	Coriobacteriales	Coriobacteriaceae	Collinsella	aerofaciens
Otu01125	24	Bacteria	Firmicutes	Clostridia	Clostridiales	Lachnospiraceae	Anaerotignum	lactatifermentans
Otu01126	24	Bacteria	Firmicutes	Clostridia	Clostridiales	Lachnospiraceae	Anaerobutyricum	Anaerobutyricum_unclassified
Otu01127	24	Bacteria	Bacteroidetes	Bacteroidia	Bacteroidales	Bacteroidaceae	Phocaeicola	vulgatus
Otu01128	24	Bacteria	Firmicutes	Clostridia	Clostridiales	Lachnospiraceae	Coprococcus	catus
Otu01129	24	Bacteria	Firmicutes	Clostridia	Clostridiales	Lachnospiraceae	Anaerobutyricum	Anaerobutyricum_unclassified
Otu01130	24	Bacteria	Firmicutes	Clostridia	Clostridiales	Lachnospiraceae	Blautia	luti
Otu01131	24	Bacteria	Firmicutes	Clostridia	Clostridiales	Lachnospiraceae	Blautia	obeum
Otu01132	23	Bacteria	Firmicutes	Clostridia	Clostridiales	Lachnospiraceae	Blautia	Blautia_unclassified
Otu01133	23	Bacteria	Actinobacteria	Actinobacteria	Bifidobacteriales	Bifidobacteriaceae	Bifidobacterium	Bifidobacterium_unclassified
Otu01134	23	Bacteria	Firmicutes	Clostridia	Clostridiales	Clostridiales_unclassified	Clostridiales_unclassified	Clostridiales_unclassified
Otu01135	23	Bacteria	Firmicutes	Clostridia	Clostridiales	Ruminococcaceae	Ruminococcaceae_unclassified	Ruminococcaceae_unclassified
Otu01136	23	Bacteria	Proteobacteria	Gammaproteobacteria	Enterobacterales	Enterobacteriaceae	Enterobacteriaceae_unclassified	Enterobacteriaceae_unclassified
Otu01137	23	Bacteria	Firmicutes	Clostridia	Clostridiales	Ruminococcaceae	Ruminococcaceae_unclassified	Ruminococcaceae_unclassified
Otu01138	23	Bacteria	Firmicutes	Clostridia	Clostridiales	Clostridiales_unclassified	Clostridiales_unclassified	Clostridiales_unclassified
Otu01139	23	Bacteria	Firmicutes	Clostridia	Clostridiales	Catabacteriaceae	Catabacter	hongkongensis
Otu01140	23	Bacteria	Actinobacteria	Coriobacteriia	Coriobacteriales	Coriobacteriaceae	Collinsella	aerofaciens
Otu01141	23	Bacteria	Firmicutes	Firmicutes_unclassified	Firmicutes_unclassified	Firmicutes_unclassified	Firmicutes_unclassified	Firmicutes_unclassified
Otu01142	23	Bacteria	Actinobacteria	Coriobacteriia	Eggerthellales	Eggerthellaceae	Eggerthella	lenta
Otu01143	23	Bacteria	Firmicutes	Clostridia	Clostridiales	Lachnospiraceae	Anaerostipes	hadrus
Otu01144	23	Bacteria	Firmicutes	Clostridia	Clostridiales	Ruminococcaceae	Ruminococcaceae_unclassified	Ruminococcaceae_unclassified
Otu01145	23	Bacteria	Bacteroidetes	Bacteroidia	Bacteroidales	Bacteroidaceae	Phocaeicola	Phocaeicola_unclassified
Otu01146	23	Bacteria	Firmicutes	Clostridia	Clostridiales	Clostridiales_unclassified	Clostridiales_unclassified	Clostridiales_unclassified
Otu01147	23	Bacteria	Firmicutes	Clostridia	Clostridia_unclassified	Clostridia_unclassified	Clostridia_unclassified	Clostridia_unclassified
Otu01148	23	Bacteria	Bacteroidetes	Bacteroidia	Bacteroidales	Prevotellaceae	Prevotella	Prevotella_unclassified
Otu01149	23	Bacteria	Bacteroidetes	Bacteroidia	Bacteroidales	Bacteroidaceae	Phocaeicola	vulgatus
Otu01150	23	Bacteria	Firmicutes	Clostridia	Clostridiales	Lachnospiraceae	Blautia	Blautia_unclassified
Otu01151	23	Bacteria	Firmicutes	Clostridia	Clostridiales	Peptoniphilaceae	Parvimonas	micra
Otu01152	23	Bacteria	Bacteroidetes	Bacteroidia	Bacteroidales	Rikenellaceae	Alistipes	putredinis
Otu01153	23	Bacteria	Proteobacteria	Betaproteobacteria	Burkholderiales	Sutterellaceae	Sutterella	wadsworthensis
Otu01154	23	Bacteria	Firmicutes	Clostridia	Clostridiales	Ruminococcaceae	Ruminococcaceae_unclassified	Ruminococcaceae_unclassified
Otu01155	23	Bacteria	Actinobacteria	Actinobacteria	Bifidobacteriales	Bifidobacteriaceae	Bifidobacterium	Bifidobacterium_unclassified
Otu01156	23	Bacteria	Bacteroidetes	Bacteroidia	Bacteroidales	Bacteroidaceae	Bacteroides	Bacteroides_unclassified
Otu01157	23	Bacteria	Firmicutes	Clostridia	Clostridiales	Clostridiales_unclassified	Clostridiales_unclassified	Clostridiales_unclassified
Otu01158	23	Bacteria	Firmicutes	Firmicutes_unclassified	Firmicutes_unclassified	Firmicutes_unclassified	Firmicutes_unclassified	Firmicutes_unclassified
Otu01159	23	Bacteria	Bacteroidetes	Bacteroidia	Bacteroidales	Bacteroidaceae	Phocaeicola	vulgatus
Otu01160	23	Bacteria	Firmicutes	Clostridia	Clostridiales	Lachnospiraceae	Fusicatenibacter	saccharivorans
Otu01161	23	Bacteria	Actinobacteria	Actinobacteria	Bifidobacteriales	Bifidobacteriaceae	Bifidobacterium	Bifidobacterium_unclassified
Otu01162	23	Bacteria	Actinobacteria	Actinobacteria	Bifidobacteriales	Bifidobacteriaceae	Bifidobacterium	Bifidobacterium_unclassified
Otu01163	23	Archaea	Euryarchaeota	Methanobacteria	Methanobacteriales	Methanobacteriaceae	Methanobrevibacter	Methanobrevibacter_unclassified
Otu01164	23	Bacteria	Bacteroidetes	Bacteroidia	Bacteroidales	Prevotellaceae	Prevotella	stercorea
Otu01165	23	Bacteria	Bacteroidetes	Bacteroidia	Bacteroidales	Bacteroidaceae	Bacteroides	uniformis
Otu01166	23	Bacteria	Firmicutes	Clostridia	Clostridiales	Lachnospiraceae	Blautia	luti
Otu01167	22	Bacteria	Firmicutes	Clostridia	Clostridiales	Lachnospiraceae	Lachnospiraceae_unclassified	Lachnospiraceae_unclassified
Otu01168	22	Bacteria	Firmicutes	Clostridia	Clostridiales	Lachnospiraceae	Blautia	luti
Otu01169	22	Bacteria	Bacteria_unclassified	Bacteria_unclassified	Bacteria_unclassified	Bacteria_unclassified	Bacteria_unclassified	Bacteria_unclassified
Otu01170	22	Bacteria	Firmicutes	Clostridia	Clostridiales	Ruminococcaceae	Ruminococcaceae_unclassified	Ruminococcaceae_unclassified
Otu01171	22	Bacteria	Firmicutes	Clostridia	Clostridiales	Lachnospiraceae	Lachnospiraceae_unclassified	Lachnospiraceae_unclassified
Otu01172	22	Bacteria	Actinobacteria	Actinobacteria	Bifidobacteriales	Bifidobacteriaceae	Bifidobacterium	Bifidobacterium_unclassified
Otu01173	22	Bacteria	Actinobacteria	Actinobacteria	Bifidobacteriales	Bifidobacteriaceae	Bifidobacterium	Bifidobacterium_unclassified
Otu01174	22	Bacteria	Firmicutes	Clostridia	Clostridiales	Lachnospiraceae	Anaerostipes	hadrus
Otu01175	22	Bacteria	Bacteroidetes	Bacteroidia	Bacteroidales	Bacteroidaceae	Phocaeicola	vulgatus
Otu01176	22	Bacteria	Firmicutes	Clostridia	Clostridiales	Lachnospiraceae	Roseburia	intestinalis
Otu01177	22	Bacteria	Firmicutes	Clostridia	Clostridiales	Lachnospiraceae	Blautia	Blautia_unclassified
Otu01178	22	Bacteria	Firmicutes	Clostridia	Clostridiales	Lachnospiraceae	Anaerobutyricum	Anaerobutyricum_unclassified
Otu01179	22	Bacteria	Firmicutes	Negativicutes	Acidaminococcales	Acidaminococcaceae	Phascolarctobacterium	faecium
Otu01180	22	Bacteria	Bacteroidetes	Bacteroidia	Bacteroidales	Bacteroidaceae	Bacteroides	uniformis
Otu01181	22	Bacteria	Firmicutes	Clostridia	Clostridiales	Lachnospiraceae	Blautia	wexlerae
Otu01182	22	Bacteria	Firmicutes	Clostridia	Clostridiales	Clostridiales_unclassified	Clostridiales_unclassified	Clostridiales_unclassified
Otu01183	22	Bacteria	Firmicutes	Clostridia	Clostridiales	Lachnospiraceae	Lachnospiraceae_unclassified	Lachnospiraceae_unclassified
Otu01184	22	Bacteria	Proteobacteria	Betaproteobacteria	Burkholderiales	Sutterellaceae	Parasutterella	excrementihominis
Otu01185	22	Bacteria	Actinobacteria	Actinobacteria	Bifidobacteriales	Bifidobacteriaceae	Bifidobacterium	Bifidobacterium_unclassified
Otu01186	22	Bacteria	Firmicutes	Clostridia	Clostridiales	Ruminococcaceae	Faecalibacterium	prausnitzii
Otu01187	22	Bacteria	Firmicutes	Clostridia	Clostridiales	Ruminococcaceae	Ruminococcaceae_unclassified	Ruminococcaceae_unclassified
Otu01188	22	Bacteria	Bacteroidetes	Bacteroidia	Bacteroidales	Bacteroidaceae	Phocaeicola	vulgatus
Otu01189	22	Bacteria	Firmicutes	Clostridia	Clostridiales	Ruminococcaceae	Faecalibacterium	prausnitzii
Otu01190	22	Bacteria	Bacteroidetes	Bacteroidia	Bacteroidales	Porphyromonadaceae	Parabacteroides	merdae
Otu01191	22	Bacteria	Bacteroidetes	Bacteroidia	Bacteroidales	Rikenellaceae	Alistipes	Alistipes_unclassified
Otu01192	22	Bacteria	Firmicutes	Clostridia	Clostridiales	Clostridiales_unclassified	Clostridiales_unclassified	Clostridiales_unclassified
Otu01193	22	Bacteria	Firmicutes	Clostridia	Clostridiales	Lachnospiraceae	Blautia	luti
Otu01194	22	Bacteria	Firmicutes	Clostridia	Clostridiales	Ruminococcaceae	Ruminococcaceae_unclassified	Ruminococcaceae_unclassified
Otu01195	22	Bacteria	Bacteroidetes	Bacteroidia	Bacteroidales	Bacteroidaceae	Phocaeicola	vulgatus
Otu01196	22	Bacteria	Firmicutes	Clostridia	Clostridiales	Lachnospiraceae	Lachnospiraceae_unclassified	Lachnospiraceae_unclassified
Otu01197	22	Bacteria	Bacteroidetes	Bacteroidia	Bacteroidales	Bacteroidaceae	Phocaeicola	vulgatus
Otu01198	22	Bacteria	Firmicutes	Bacilli	Lactobacillales	Lactobacillales_unclassified	Lactobacillales_unclassified	Lactobacillales_unclassified
Otu01199	22	Bacteria	Bacteroidetes	Bacteroidia	Bacteroidales	Bacteroidaceae	Bacteroides	Bacteroides_unclassified
Otu01200	22	Bacteria	Lentisphaerae	Lentisphaeria	Victivallales	Victivallaceae	Victivallis	vadensis
Otu01201	22	Bacteria	Bacteroidetes	Bacteroidia	Bacteroidales	Bacteroidaceae	Phocaeicola	vulgatus
Otu01202	22	Bacteria	Bacteroidetes	Bacteroidia	Bacteroidales	Bacteroidaceae	Bacteroides	Bacteroides_unclassified
Otu01203	22	Bacteria	Firmicutes	Clostridia	Clostridiales	Clostridiales_unclassified	Clostridiales_unclassified	Clostridiales_unclassified
Otu01204	21	Bacteria	Firmicutes	Clostridia	Clostridiales	Ruminococcaceae	Ruminococcaceae_unclassified	Ruminococcaceae_unclassified
Otu01205	21	Bacteria	Bacteroidetes	Bacteroidia	Bacteroidales	Bacteroidaceae	Phocaeicola	vulgatus
Otu01206	21	Bacteria	Firmicutes	Clostridia	Clostridiales	Lachnospiraceae	Lachnospiraceae_unclassified	Lachnospiraceae_unclassified
Otu01207	21	Bacteria	Firmicutes	Clostridia	Clostridiales	Lachnospiraceae	Blautia	Blautia_unclassified
Otu01208	21	Bacteria	Bacteroidetes	Bacteroidia	Bacteroidales	Bacteroidaceae	Phocaeicola	vulgatus
Otu01209	21	Bacteria	Firmicutes	Clostridia	Clostridiales	Lachnospiraceae	Blautia	Blautia_unclassified
Otu01210	21	Bacteria	Proteobacteria	Betaproteobacteria	Burkholderiales	Sutterellaceae	Parasutterella	excrementihominis
Otu01211	21	Bacteria	Actinobacteria	Coriobacteriia	Coriobacteriales	Coriobacteriaceae	Collinsella	aerofaciens
Otu01212	21	Bacteria	Bacteroidetes	Bacteroidia	Bacteroidales	Bacteroidaceae	Bacteroides	caccae
Otu01213	21	Bacteria	Proteobacteria	Gammaproteobacteria	Enterobacterales	Enterobacteriaceae	Enterobacteriaceae_unclassified	Enterobacteriaceae_unclassified
Otu01214	21	Bacteria	Firmicutes	Clostridia	Clostridiales	Ruminococcaceae	Agathobaculum	Agathobaculum_unclassified
Otu01215	21	Bacteria	Firmicutes	Clostridia	Clostridiales	Lachnospiraceae	Lachnospiraceae_unclassified	Lachnospiraceae_unclassified
Otu01216	21	Bacteria	Proteobacteria	Gammaproteobacteria	Enterobacterales	Enterobacteriaceae	Enterobacteriaceae_unclassified	Enterobacteriaceae_unclassified
Otu01217	21	Bacteria	Firmicutes	Clostridia	Clostridiales	Lachnospiraceae	Blautia	Blautia_unclassified
Otu01218	21	Bacteria	Firmicutes	Clostridia	Clostridiales	Lachnospiraceae	Lachnospiraceae_unclassified	Lachnospiraceae_unclassified
Otu01219	21	Bacteria	Firmicutes	Clostridia	Clostridiales	Lachnospiraceae	Blautia	Blautia_unclassified
Otu01220	21	Bacteria	Firmicutes	Clostridia	Clostridiales	Clostridiales_unclassified	Clostridiales_unclassified	Clostridiales_unclassified
Otu01221	21	Bacteria	Actinobacteria	Actinobacteria	Bifidobacteriales	Bifidobacteriaceae	Bifidobacterium	Bifidobacterium_unclassified
Otu01222	21	Bacteria	Bacteroidetes	Bacteroidia	Bacteroidales	Bacteroidaceae	Bacteroides	intestinalis
Otu01223	21	Bacteria	Firmicutes	Clostridia	Clostridiales	Ruminococcaceae	Ruminococcus	bromii
Otu01224	21	Bacteria	Proteobacteria	Betaproteobacteria	Burkholderiales	Sutterellaceae	Sutterellaceae_unclassified	Sutterellaceae_unclassified
Otu01225	21	Bacteria	Actinobacteria	Actinobacteria	Bifidobacteriales	Bifidobacteriaceae	Bifidobacterium	Bifidobacterium_unclassified
Otu01226	21	Bacteria	Firmicutes	Clostridia	Clostridiales	Lachnospiraceae	Dorea	longicatena
Otu01227	21	Bacteria	Firmicutes	Clostridia	Clostridiales	Lachnospiraceae	Blautia	Blautia_unclassified
Otu01228	21	Bacteria	Bacteroidetes	Bacteroidia	Bacteroidales	Bacteroidaceae	Phocaeicola	vulgatus
Otu01229	21	Bacteria	Firmicutes	Clostridia	Clostridiales	Clostridiales_unclassified	Clostridiales_unclassified	Clostridiales_unclassified
Otu01230	21	Bacteria	Firmicutes	Clostridia	Clostridiales	Lachnospiraceae	Lachnospiraceae_unclassified	Lachnospiraceae_unclassified
Otu01231	21	Bacteria	Actinobacteria	Actinobacteria	Bifidobacteriales	Bifidobacteriaceae	Bifidobacterium	Bifidobacterium_unclassified
Otu01232	21	Bacteria	Bacteroidetes	Bacteroidia	Bacteroidales	Bacteroidaceae	Phocaeicola	vulgatus
Otu01233	21	Bacteria	Firmicutes	Clostridia	Clostridiales	Lachnospiraceae	Blautia	luti
Otu01234	21	Bacteria	Firmicutes	Clostridia	Clostridiales	Ruminococcaceae	Ruminococcaceae_unclassified	Ruminococcaceae_unclassified
Otu01235	21	Bacteria	Firmicutes	Clostridia	Clostridiales	Lachnospiraceae	Blautia	Blautia_unclassified
Otu01236	21	Bacteria	Firmicutes	Clostridia	Clostridiales	Clostridiales_unclassified	Clostridiales_unclassified	Clostridiales_unclassified
Otu01237	21	Bacteria	Bacteroidetes	Bacteroidia	Bacteroidales	Bacteroidaceae	Phocaeicola	vulgatus
Otu01238	21	Bacteria	Firmicutes	Clostridia	Clostridiales	Ruminococcaceae	Anaerotruncus	colihominis
Otu01239	21	Bacteria	Firmicutes	Clostridia	Clostridiales	Lachnospiraceae	Lachnospiraceae_unclassified	Lachnospiraceae_unclassified
Otu01240	21	Bacteria	Firmicutes	Clostridia	Clostridiales	Lachnospiraceae	Blautia	wexlerae
Otu01241	21	Bacteria	Bacteroidetes	Bacteroidia	Bacteroidales	Bacteroidaceae	Phocaeicola	vulgatus
Otu01242	21	Bacteria	Firmicutes	Clostridia	Clostridiales	Lachnospiraceae	Lachnospiraceae_unclassified	Lachnospiraceae_unclassified
Otu01243	21	Bacteria	Firmicutes	Clostridia	Clostridiales	Ruminococcaceae	Flintibacter	Flintibacter_unclassified
Otu01244	21	Bacteria	Bacteroidetes	Bacteroidia	Bacteroidales	Bacteroidaceae	Bacteroides	Bacteroides_unclassified
Otu01245	21	Bacteria	Firmicutes	Clostridia	Clostridiales	Lachnospiraceae	Anaerostipes	hadrus
Otu01246	21	Bacteria	Bacteroidetes	Bacteroidia	Bacteroidales	Bacteroidaceae	Phocaeicola	vulgatus
Otu01247	21	Bacteria	Bacteroidetes	Bacteroidia	Bacteroidales	Bacteroidaceae	Bacteroides	uniformis
Otu01248	20	Bacteria	Bacteroidetes	Bacteroidia	Bacteroidales	Bacteroidaceae	Phocaeicola	vulgatus
Otu01249	20	Bacteria	Actinobacteria	Actinobacteria	Bifidobacteriales	Bifidobacteriaceae	Bifidobacterium	Bifidobacterium_unclassified
Otu01250	20	Bacteria	Firmicutes	Clostridia	Clostridiales	Ruminococcaceae	Ruminococcaceae_unclassified	Ruminococcaceae_unclassified
Otu01251	20	Bacteria	Firmicutes	Clostridia	Clostridiales	Lachnospiraceae	Coprococcus	comes
Otu01252	20	Bacteria	Proteobacteria	Gammaproteobacteria	Enterobacterales	Enterobacteriaceae	Enterobacteriaceae_unclassified	Enterobacteriaceae_unclassified
Otu01253	20	Bacteria	Bacteroidetes	Bacteroidia	Bacteroidales	Bacteroidaceae	Phocaeicola	vulgatus
Otu01254	20	Bacteria	Firmicutes	Clostridia	Clostridiales	Lachnospiraceae	Anaerobutyricum	Anaerobutyricum_unclassified
Otu01255	20	Bacteria	Firmicutes	Clostridia	Clostridiales	Lachnospiraceae	Blautia	Blautia_unclassified
Otu01256	20	Bacteria	Bacteroidetes	Bacteroidia	Bacteroidales	Bacteroidaceae	Bacteroides	Bacteroides_unclassified
Otu01257	20	Bacteria	Firmicutes	Clostridia	Clostridiales	Lachnospiraceae	Fusicatenibacter	saccharivorans
Otu01258	20	Bacteria	Proteobacteria	Betaproteobacteria	Burkholderiales	Sutterellaceae	Parasutterella	excrementihominis
Otu01259	20	Bacteria	Verrucomicrobia	Verrucomicrobiae	Verrucomicrobiales	Akkermansiaceae	Akkermansia	muciniphila
Otu01260	20	Bacteria	Verrucomicrobia	Verrucomicrobiae	Verrucomicrobiales	Akkermansiaceae	Akkermansia	muciniphila
Otu01261	20	Bacteria	Bacteroidetes	Bacteroidia	Bacteroidales	Bacteroidaceae	Phocaeicola	vulgatus
Otu01262	20	Bacteria	Firmicutes	Negativicutes	Acidaminococcales	Acidaminococcaceae	Phascolarctobacterium	faecium
Otu01263	20	Bacteria	Firmicutes	Clostridia	Clostridiales	Lachnospiraceae	Lachnospiraceae_unclassified	Lachnospiraceae_unclassified
Otu01264	20	Bacteria	Firmicutes	Clostridia	Clostridiales	Lachnospiraceae	Blautia	Blautia_unclassified
Otu01265	20	Bacteria	Bacteroidetes	Bacteroidia	Bacteroidales	Bacteroidaceae	Bacteroides	Bacteroides_unclassified
Otu01266	20	Bacteria	Firmicutes	Firmicutes_unclassified	Firmicutes_unclassified	Firmicutes_unclassified	Firmicutes_unclassified	Firmicutes_unclassified
Otu01267	20	Bacteria	Firmicutes	Clostridia	Clostridiales	Ruminococcaceae	Faecalibacterium	prausnitzii
Otu01268	20	Bacteria	Actinobacteria	Actinobacteria	Bifidobacteriales	Bifidobacteriaceae	Bifidobacterium	Bifidobacterium_unclassified
Otu01269	20	Bacteria	Bacteroidetes	Bacteroidia	Bacteroidales	Bacteroidaceae	Bacteroides	Bacteroides_unclassified
Otu01270	20	Bacteria	Firmicutes	Erysipelotrichia	Erysipelotrichales	Erysipelotrichaceae	Holdemanella	Holdemanella_unclassified
Otu01271	20	Bacteria	Bacteroidetes	Bacteroidia	Bacteroidales	Bacteroidaceae	Bacteroides	Bacteroides_unclassified
Otu01272	20	Bacteria	Bacteroidetes	Bacteroidia	Bacteroidales	Bacteroidaceae	Phocaeicola	vulgatus
Otu01273	20	Bacteria	Firmicutes	Clostridia	Clostridiales	Lachnospiraceae	Blautia	luti
Otu01274	20	Bacteria	Firmicutes	Clostridia	Clostridiales	Lachnospiraceae	Dorea	longicatena
Otu01275	20	Bacteria	Firmicutes	Clostridia	Clostridiales	Lachnospiraceae	Agathobacter	Agathobacter_unclassified
Otu01276	20	Bacteria	Proteobacteria	Gammaproteobacteria	Enterobacterales	Enterobacteriaceae	Enterobacteriaceae_unclassified	Enterobacteriaceae_unclassified
Otu01277	20	Bacteria	Firmicutes	Clostridia	Clostridiales	Lachnospiraceae	Anaerostipes	hadrus
Otu01278	20	Bacteria	Firmicutes	Clostridia	Clostridiales	Lachnospiraceae	Blautia	Blautia_unclassified
Otu01279	20	Bacteria	Firmicutes	Clostridia	Clostridiales	Lachnospiraceae	Blautia	Blautia_unclassified
Otu01280	20	Bacteria	Firmicutes	Clostridia	Clostridiales	Lachnospiraceae	Lachnospiraceae_unclassified	Lachnospiraceae_unclassified
Otu01281	20	Bacteria	Bacteroidetes	Bacteroidia	Bacteroidales	Bacteroidaceae	Phocaeicola	vulgatus
Otu01282	20	Bacteria	Firmicutes	Clostridia	Clostridiales	Ruminococcaceae	Ruminococcaceae_unclassified	Ruminococcaceae_unclassified
Otu01283	20	Bacteria	Bacteria_unclassified	Bacteria_unclassified	Bacteria_unclassified	Bacteria_unclassified	Bacteria_unclassified	Bacteria_unclassified
Otu01284	20	Bacteria	Firmicutes	Negativicutes	Veillonellales	Veillonellaceae	Dialister	succinatiphilus
Otu01285	20	Bacteria	Firmicutes	Clostridia	Clostridiales	Lachnospiraceae	Blautia	Blautia_unclassified
Otu01286	20	Bacteria	Firmicutes	Clostridia	Clostridiales	Lachnospiraceae	Blautia	Blautia_unclassified
Otu01287	20	Bacteria	Firmicutes	Clostridia	Clostridiales	Ruminococcaceae	Ruminococcus	bromii
Otu01288	20	Bacteria	Bacteroidetes	Bacteroidia	Bacteroidales	Rikenellaceae	Alistipes	obesi
Otu01289	20	Bacteria	Bacteroidetes	Bacteroidia	Bacteroidales	Bacteroidaceae	Bacteroides	uniformis
Otu01290	20	Bacteria	Bacteroidetes	Bacteroidia	Bacteroidales	Porphyromonadaceae	Parabacteroides	merdae
Otu01291	20	Bacteria	Bacteroidetes	Bacteroidia	Bacteroidales	Prevotellaceae	Prevotellaceae_unclassified	Prevotellaceae_unclassified
Otu01292	20	Bacteria	Firmicutes	Clostridia	Clostridiales	Ruminococcaceae	Ruminococcus	bromii
Otu01293	20	Bacteria	Bacteroidetes	Bacteroidia	Bacteroidales	Bacteroidaceae	Bacteroides	Bacteroides_unclassified
Otu01294	20	Bacteria	Proteobacteria	Betaproteobacteria	Burkholderiales	Sutterellaceae	Parasutterella	excrementihominis
Otu01295	19	Bacteria	Firmicutes	Clostridia	Clostridiales	Lachnospiraceae	Fusicatenibacter	saccharivorans
Otu01296	19	Bacteria	Bacteroidetes	Bacteroidia	Bacteroidales	Bacteroidaceae	Phocaeicola	vulgatus
Otu01297	19	Bacteria	Firmicutes	Clostridia	Clostridiales	Lachnospiraceae	Lachnospiraceae_unclassified	Lachnospiraceae_unclassified
Otu01298	19	Bacteria	Bacteroidetes	Bacteroidia	Bacteroidales	Bacteroidaceae	Phocaeicola	vulgatus
Otu01299	19	Bacteria	Actinobacteria	Coriobacteriia	Coriobacteriales	Coriobacteriaceae	Senegalimassilia	anaerobia
Otu01300	19	Bacteria	Firmicutes	Clostridia	Clostridiales	Ruminococcaceae	Ruminococcaceae_unclassified	Ruminococcaceae_unclassified
Otu01301	19	Bacteria	Firmicutes	Clostridia	Clostridiales	Ruminococcaceae	Ruminococcaceae_unclassified	Ruminococcaceae_unclassified
Otu01302	19	Bacteria	Firmicutes	Clostridia	Clostridia_unclassified	Clostridia_unclassified	Clostridia_unclassified	Clostridia_unclassified
Otu01303	19	Bacteria	Firmicutes	Clostridia	Clostridiales	Lachnospiraceae	Lachnospiraceae_unclassified	Lachnospiraceae_unclassified
Otu01304	19	Bacteria	Firmicutes	Clostridia	Clostridiales	Ruminococcaceae	Ruminococcus	bromii
Otu01305	19	Bacteria	Verrucomicrobia	Verrucomicrobiae	Verrucomicrobiales	Akkermansiaceae	Akkermansia	muciniphila
Otu01306	19	Bacteria	Firmicutes	Clostridia	Clostridiales	Ruminococcaceae	Ruminococcaceae_unclassified	Ruminococcaceae_unclassified
Otu01307	19	Bacteria	Firmicutes	Clostridia	Clostridiales	Lachnospiraceae	Lachnospiraceae_unclassified	Lachnospiraceae_unclassified
Otu01308	19	Bacteria	Firmicutes	Clostridia	Clostridiales	Lachnospiraceae	Anaerotignum	lactatifermentans
Otu01309	19	Bacteria	Firmicutes	Clostridia	Clostridiales	Lachnospiraceae	Dorea	longicatena
Otu01310	19	Bacteria	Bacteroidetes	Bacteroidia	Bacteroidales	Bacteroidaceae	Phocaeicola	vulgatus
Otu01311	19	Bacteria	Bacteroidetes	Bacteroidia	Bacteroidales	Bacteroidaceae	Phocaeicola	vulgatus
Otu01312	19	Bacteria	Firmicutes	Clostridia	Clostridiales	Lachnospiraceae	Fusicatenibacter	saccharivorans
Otu01313	19	Bacteria	Firmicutes	Clostridia	Clostridiales	Lachnospiraceae	Anaerostipes	hadrus
Otu01314	19	Bacteria	Proteobacteria	Betaproteobacteria	Burkholderiales	Sutterellaceae	Parasutterella	excrementihominis
Otu01315	19	Bacteria	Bacteroidetes	Bacteroidia	Bacteroidales	Bacteroidaceae	Bacteroides	uniformis
Otu01316	19	Bacteria	Proteobacteria	Gammaproteobacteria	Enterobacterales	Enterobacteriaceae	Enterobacteriaceae_unclassified	Enterobacteriaceae_unclassified
Otu01317	19	Bacteria	Firmicutes	Clostridia	Clostridiales	Ruminococcaceae	Ruminococcaceae_unclassified	Ruminococcaceae_unclassified
Otu01318	19	Bacteria	Proteobacteria	Gammaproteobacteria	Enterobacterales	Enterobacteriaceae	Enterobacteriaceae_unclassified	Enterobacteriaceae_unclassified
Otu01319	19	Bacteria	Firmicutes	Clostridia	Clostridiales	Lachnospiraceae	Lachnospiraceae_unclassified	Lachnospiraceae_unclassified
Otu01320	19	Bacteria	Firmicutes	Clostridia	Clostridiales	Ruminococcaceae	Faecalibacterium	prausnitzii
Otu01321	19	Bacteria	Bacteroidetes	Bacteroidia	Bacteroidales	Bacteroidaceae	Bacteroides	Bacteroides_unclassified
Otu01322	19	Bacteria	Bacteroidetes	Bacteroidia	Bacteroidales	Bacteroidaceae	Phocaeicola	Phocaeicola_unclassified
Otu01323	19	Bacteria	Bacteria_unclassified	Bacteria_unclassified	Bacteria_unclassified	Bacteria_unclassified	Bacteria_unclassified	Bacteria_unclassified
Otu01324	19	Bacteria	Firmicutes	Negativicutes	Veillonellales	Veillonellaceae	Dialister	invisus
Otu01325	19	Bacteria	Firmicutes	Clostridia	Clostridiales	Lachnospiraceae	Blautia	Blautia_unclassified
Otu01326	19	Bacteria	Firmicutes	Erysipelotrichia	Erysipelotrichales	Erysipelotrichaceae	Turicibacter	sanguinis
Otu01327	19	Bacteria	Bacteroidetes	Bacteroidia	Bacteroidales	Bacteroidaceae	Bacteroides	Bacteroides_unclassified
Otu01328	19	Bacteria	Firmicutes	Clostridia	Clostridiales	Lachnospiraceae	Anaerostipes	hadrus
Otu01329	19	Bacteria	Firmicutes	Firmicutes_unclassified	Firmicutes_unclassified	Firmicutes_unclassified	Firmicutes_unclassified	Firmicutes_unclassified
Otu01330	19	Bacteria	Proteobacteria	Betaproteobacteria	Burkholderiales	Sutterellaceae	Parasutterella	excrementihominis
Otu01331	19	Bacteria	Firmicutes	Clostridia	Clostridiales	Lachnospiraceae	Blautia	Blautia_unclassified
Otu01332	19	Bacteria	Actinobacteria	Actinobacteria	Bifidobacteriales	Bifidobacteriaceae	Bifidobacterium	Bifidobacterium_unclassified
Otu01333	19	Bacteria	Bacteroidetes	Bacteroidia	Bacteroidales	Bacteroidaceae	Bacteroides	Bacteroides_unclassified
Otu01334	19	Bacteria	Firmicutes	Clostridia	Clostridiales	Lachnospiraceae	Blautia	Blautia_unclassified
Otu01335	19	Bacteria	Firmicutes	Clostridia	Clostridiales	Lachnospiraceae	Dorea	longicatena
Otu01336	19	Bacteria	Actinobacteria	Actinobacteria	Bifidobacteriales	Bifidobacteriaceae	Bifidobacterium	Bifidobacterium_unclassified
Otu01337	19	Bacteria	Proteobacteria	Gammaproteobacteria	Enterobacterales	Enterobacteriaceae	Enterobacteriaceae_unclassified	Enterobacteriaceae_unclassified
Otu01338	19	Bacteria	Bacteroidetes	Bacteroidia	Bacteroidales	Bacteroidaceae	Phocaeicola	vulgatus
Otu01339	19	Bacteria	Firmicutes	Clostridia	Clostridiales	Ruminococcaceae	Ruminococcaceae_unclassified	Ruminococcaceae_unclassified
Otu01340	19	Bacteria	Actinobacteria	Actinobacteria	Bifidobacteriales	Bifidobacteriaceae	Bifidobacterium	Bifidobacterium_unclassified
Otu01341	19	Bacteria	Firmicutes	Clostridia	Clostridiales	Clostridiales_unclassified	Clostridiales_unclassified	Clostridiales_unclassified
Otu01342	19	Bacteria	Bacteroidetes	Bacteroidia	Bacteroidales	Bacteroidaceae	Phocaeicola	vulgatus
Otu01343	19	Bacteria	Actinobacteria	Actinobacteria	Bifidobacteriales	Bifidobacteriaceae	Bifidobacterium	adolescentis
Otu01344	19	Bacteria	Firmicutes	Clostridia	Clostridiales	Lachnospiraceae	Fusicatenibacter	saccharivorans
Otu01345	19	Bacteria	Firmicutes	Clostridia	Clostridiales	Ruminococcaceae	Faecalibacterium	prausnitzii
Otu01346	19	Bacteria	Firmicutes	Clostridia	Clostridiales	Lachnospiraceae	Fusicatenibacter	saccharivorans
Otu01347	19	Bacteria	Firmicutes	Clostridia	Clostridiales	Ruminococcaceae	Ruminococcus	bromii
Otu01348	19	Bacteria	Bacteria_unclassified	Bacteria_unclassified	Bacteria_unclassified	Bacteria_unclassified	Bacteria_unclassified	Bacteria_unclassified
Otu01349	19	Bacteria	Bacteroidetes	Bacteroidia	Bacteroidales	Bacteroidaceae	Phocaeicola	vulgatus
Otu01350	19	Bacteria	Bacteroidetes	Bacteroidia	Bacteroidales	Bacteroidaceae	Bacteroides	intestinalis
Otu01351	19	Bacteria	Firmicutes	Clostridia	Clostridiales	Lachnospiraceae	Fusicatenibacter	saccharivorans
Otu01352	19	Bacteria	Firmicutes	Clostridia	Clostridiales	Lachnospiraceae	Lachnospiraceae_unclassified	Lachnospiraceae_unclassified
Otu01353	18	Bacteria	Bacteria_unclassified	Bacteria_unclassified	Bacteria_unclassified	Bacteria_unclassified	Bacteria_unclassified	Bacteria_unclassified
Otu01354	18	Bacteria	Bacteroidetes	Bacteroidia	Bacteroidales	Bacteroidaceae	Bacteroides	Bacteroides_unclassified
Otu01355	18	Bacteria	Firmicutes	Clostridia	Clostridiales	Lachnospiraceae	Lachnospiraceae_unclassified	Lachnospiraceae_unclassified
Otu01356	18	Bacteria	Bacteroidetes	Bacteroidia	Bacteroidales	Porphyromonadaceae	Parabacteroides	distasonis
Otu01357	18	Bacteria	Bacteroidetes	Bacteroidia	Bacteroidales	Bacteroidaceae	Phocaeicola	vulgatus
Otu01358	18	Bacteria	Bacteroidetes	Bacteroidia	Bacteroidales	Bacteroidaceae	Bacteroides	Bacteroides_unclassified
Otu01359	18	Bacteria	Bacteroidetes	Bacteroidia	Bacteroidales	Bacteroidaceae	Phocaeicola	vulgatus
Otu01360	18	Bacteria	Firmicutes	Clostridia	Clostridiales	Clostridiales_unclassified	Clostridiales_unclassified	Clostridiales_unclassified
Otu01361	18	Bacteria	Bacteroidetes	Bacteroidia	Bacteroidales	Porphyromonadaceae	Parabacteroides	merdae
Otu01362	18	Bacteria	Firmicutes	Clostridia	Clostridiales	Ruminococcaceae	Ruminococcaceae_unclassified	Ruminococcaceae_unclassified
Otu01363	18	Bacteria	Bacteroidetes	Bacteroidia	Bacteroidales	Bacteroidaceae	Phocaeicola	vulgatus
Otu01364	18	Bacteria	Bacteroidetes	Bacteroidia	Bacteroidales	Bacteroidaceae	Phocaeicola	vulgatus
Otu01365	18	Bacteria	Bacteroidetes	Bacteroidia	Bacteroidales	Bacteroidaceae	Phocaeicola	vulgatus
Otu01366	18	Bacteria	Firmicutes	Clostridia	Clostridiales	Lachnospiraceae	Blautia	luti
Otu01367	18	Archaea	Euryarchaeota	Methanobacteria	Methanobacteriales	Methanobacteriaceae	Methanobrevibacter	Methanobrevibacter_unclassified
Otu01368	18	Bacteria	Firmicutes	Clostridia	Clostridiales	Lachnospiraceae	Lachnospiraceae_unclassified	Lachnospiraceae_unclassified
Otu01369	18	Bacteria	Actinobacteria	Actinobacteria	Bifidobacteriales	Bifidobacteriaceae	Bifidobacterium	Bifidobacterium_unclassified
Otu01370	18	Bacteria	Proteobacteria	Gammaproteobacteria	Enterobacterales	Enterobacteriaceae	Enterobacteriaceae_unclassified	Enterobacteriaceae_unclassified
Otu01371	18	Bacteria	Bacteroidetes	Bacteroidia	Bacteroidales	Bacteroidaceae	Bacteroides	intestinalis
Otu01372	18	Bacteria	Firmicutes	Clostridia	Clostridiales	Lachnospiraceae	Dorea	longicatena
Otu01373	18	Bacteria	Proteobacteria	Betaproteobacteria	Burkholderiales	Sutterellaceae	Sutterella	wadsworthensis
Otu01374	18	Bacteria	Firmicutes	Clostridia	Clostridiales	Ruminococcaceae	Ruminococcaceae_unclassified	Ruminococcaceae_unclassified
Otu01375	18	Bacteria	Proteobacteria	Betaproteobacteria	Burkholderiales	Sutterellaceae	Sutterella	wadsworthensis
Otu01376	18	Bacteria	Firmicutes	Clostridia	Clostridiales	Clostridiales_unclassified	Clostridiales_unclassified	Clostridiales_unclassified
Otu01377	18	Bacteria	Firmicutes	Clostridia	Clostridiales	Ruminococcaceae	Ruminococcus	bromii
Otu01378	18	Bacteria	Actinobacteria	Actinobacteria	Bifidobacteriales	Bifidobacteriaceae	Bifidobacterium	adolescentis
Otu01379	18	Bacteria	Firmicutes	Negativicutes	Veillonellales	Veillonellaceae	Dialister	Dialister_unclassified
Otu01380	18	Bacteria	Actinobacteria	Actinobacteria	Bifidobacteriales	Bifidobacteriaceae	Bifidobacterium	adolescentis
Otu01381	18	Bacteria	Firmicutes	Firmicutes_unclassified	Firmicutes_unclassified	Firmicutes_unclassified	Firmicutes_unclassified	Firmicutes_unclassified
Otu01382	18	Bacteria	Verrucomicrobia	Verrucomicrobiae	Verrucomicrobiales	Akkermansiaceae	Akkermansia	muciniphila
Otu01383	18	Bacteria	Firmicutes	Firmicutes_unclassified	Firmicutes_unclassified	Firmicutes_unclassified	Firmicutes_unclassified	Firmicutes_unclassified
Otu01384	18	Bacteria	Bacteroidetes	Bacteroidia	Bacteroidales	Bacteroidaceae	Phocaeicola	Phocaeicola_unclassified
Otu01385	18	Bacteria	Firmicutes	Clostridia	Clostridiales	Ruminococcaceae	Faecalibacterium	prausnitzii
Otu01386	18	Bacteria	Bacteroidetes	Bacteroidia	Bacteroidales	Bacteroidaceae	Phocaeicola	vulgatus
Otu01387	18	Bacteria	Firmicutes	Clostridia	Clostridiales	Lachnospiraceae	Roseburia	Roseburia_unclassified
Otu01388	18	Bacteria	Bacteroidetes	Bacteroidia	Bacteroidales	Barnesiellaceae	Barnesiella	intestinihominis
Otu01389	18	Bacteria	Bacteroidetes	Bacteroidia	Bacteroidales	Bacteroidaceae	Phocaeicola	Phocaeicola_unclassified
Otu01390	18	Bacteria	Bacteroidetes	Bacteroidia	Bacteroidales	Bacteroidaceae	Phocaeicola	vulgatus
Otu01391	18	Bacteria	Bacteroidetes	Bacteroidia	Bacteroidales	Bacteroidaceae	Phocaeicola	Phocaeicola_unclassified
Otu01392	18	Bacteria	Bacteroidetes	Bacteroidia	Bacteroidales	Porphyromonadaceae	Parabacteroides	merdae
Otu01393	18	Bacteria	Firmicutes	Clostridia	Clostridiales	Ruminococcaceae	Ruminococcus	bromii
Otu01394	18	Bacteria	Firmicutes	Clostridia	Clostridiales	Lachnospiraceae	Fusicatenibacter	saccharivorans
Otu01395	18	Bacteria	Proteobacteria	Gammaproteobacteria	Enterobacterales	Enterobacteriaceae	Enterobacteriaceae_unclassified	Enterobacteriaceae_unclassified
Otu01396	18	Bacteria	Bacteroidetes	Bacteroidia	Bacteroidales	Bacteroidaceae	Phocaeicola	vulgatus
Otu01397	18	Bacteria	Bacteroidetes	Bacteroidia	Bacteroidales	Bacteroidaceae	Phocaeicola	vulgatus
Otu01398	18	Bacteria	Bacteroidetes	Bacteroidia	Bacteroidales	Bacteroidaceae	Bacteroides	Bacteroides_unclassified
Otu01399	18	Bacteria	Firmicutes	Clostridia	Clostridiales	Lachnospiraceae	Blautia	Blautia_unclassified
Otu01400	18	Bacteria	Firmicutes	Clostridia	Clostridiales	Ruminococcaceae	Ruminococcaceae_unclassified	Ruminococcaceae_unclassified
Otu01401	18	Bacteria	Firmicutes	Clostridia	Clostridiales	Lachnospiraceae	Lachnospiraceae_unclassified	Lachnospiraceae_unclassified
Otu01402	18	Bacteria	Actinobacteria	Actinobacteria	Bifidobacteriales	Bifidobacteriaceae	Bifidobacterium	Bifidobacterium_unclassified
Otu01403	18	Bacteria	Firmicutes	Firmicutes_unclassified	Firmicutes_unclassified	Firmicutes_unclassified	Firmicutes_unclassified	Firmicutes_unclassified
Otu01404	18	Bacteria	Bacteroidetes	Bacteroidia	Bacteroidales	Bacteroidaceae	Phocaeicola	vulgatus
Otu01405	18	Bacteria	Firmicutes	Clostridia	Clostridiales	Ruminococcaceae	Ruminococcaceae_unclassified	Ruminococcaceae_unclassified
Otu01406	18	Bacteria	Bacteroidetes	Bacteroidia	Bacteroidales	Bacteroidales_unclassified	Bacteroidales_unclassified	Bacteroidales_unclassified
Otu01407	18	Bacteria	Firmicutes	Clostridia	Clostridiales	Lachnospiraceae	Lachnospiraceae_unclassified	Lachnospiraceae_unclassified
Otu01408	18	Bacteria	Bacteroidetes	Bacteroidia	Bacteroidales	Bacteroidaceae	Bacteroides	thetaiotaomicron VPI-5482
Otu01409	18	Bacteria	Bacteroidetes	Bacteroidia	Bacteroidales	Bacteroidaceae	Bacteroides	caccae
Otu01410	18	Bacteria	Firmicutes	Clostridia	Clostridiales	Lachnospiraceae	Fusicatenibacter	saccharivorans
Otu01411	18	Bacteria	Bacteroidetes	Bacteroidia	Bacteroidales	Bacteroidaceae	Bacteroides	uniformis
Otu01412	17	Bacteria	Bacteroidetes	Bacteroidia	Bacteroidales	Odoribacteraceae	Butyricimonas	Butyricimonas_unclassified
Otu01413	17	Bacteria	Firmicutes	Erysipelotrichia	Erysipelotrichales	Erysipelotrichaceae	Turicibacter	sanguinis
Otu01414	17	Bacteria	Firmicutes	Clostridia	Clostridiales	Lachnospiraceae	Lachnospiraceae_unclassified	Lachnospiraceae_unclassified
Otu01415	17	Bacteria	Firmicutes	Clostridia	Clostridiales	Ruminococcaceae	Faecalibacterium	prausnitzii
Otu01416	17	Bacteria	Firmicutes	Clostridia	Clostridiales	Ruminococcaceae	Ruminococcaceae_unclassified	Ruminococcaceae_unclassified
Otu01417	17	Bacteria	Firmicutes	Clostridia	Clostridiales	Lachnospiraceae	Blautia	luti
Otu01418	17	Bacteria	Firmicutes	Clostridia	Clostridiales	Lachnospiraceae	Lachnospiraceae_unclassified	Lachnospiraceae_unclassified
Otu01419	17	Bacteria	Firmicutes	Clostridia	Clostridiales	Lachnospiraceae	Fusicatenibacter	saccharivorans
Otu01420	17	Bacteria	Firmicutes	Clostridia	Clostridiales	Clostridiales_Incertae Sedis XIII	Mogibacterium	pumilum
Otu01421	17	Bacteria	Bacteroidetes	Bacteroidia	Bacteroidales	Bacteroidaceae	Phocaeicola	vulgatus
Otu01422	17	Bacteria	Firmicutes	Clostridia	Clostridiales	Lachnospiraceae	Coprococcus	comes
Otu01423	17	Bacteria	Bacteroidetes	Bacteroidia	Bacteroidales	Rikenellaceae	Alistipes	putredinis
Otu01424	17	Bacteria	Actinobacteria	Actinobacteria	Bifidobacteriales	Bifidobacteriaceae	Bifidobacterium	Bifidobacterium_unclassified
Otu01425	17	Bacteria	Bacteroidetes	Bacteroidia	Bacteroidales	Bacteroidaceae	Bacteroides	Bacteroides_unclassified
Otu01426	17	Bacteria	Bacteroidetes	Bacteroidetes_unclassified	Bacteroidetes_unclassified	Bacteroidetes_unclassified	Bacteroidetes_unclassified	Bacteroidetes_unclassified
Otu01427	17	Bacteria	Firmicutes	Clostridia	Clostridiales	Lachnospiraceae	Lachnospiraceae_unclassified	Lachnospiraceae_unclassified
Otu01428	17	Bacteria	Firmicutes	Clostridia	Clostridiales	Ruminococcaceae	Ruminococcus	bromii
Otu01429	17	Bacteria	Firmicutes	Clostridia	Clostridiales	Ruminococcaceae	Ruminococcaceae_unclassified	Ruminococcaceae_unclassified
Otu01430	17	Bacteria	Actinobacteria	Actinobacteria	Bifidobacteriales	Bifidobacteriaceae	Bifidobacterium	Bifidobacterium_unclassified
Otu01431	17	Bacteria	Firmicutes	Clostridia	Clostridiales	Lachnospiraceae	Lachnospiraceae_unclassified	Lachnospiraceae_unclassified
Otu01432	17	Bacteria	Actinobacteria	Actinobacteria	Bifidobacteriales	Bifidobacteriaceae	Bifidobacterium	Bifidobacterium_unclassified
Otu01433	17	Bacteria	Bacteroidetes	Bacteroidia	Bacteroidales	Bacteroidaceae	Bacteroides	Bacteroides_unclassified
Otu01434	17	Bacteria	Firmicutes	Clostridia	Clostridiales	Lachnospiraceae	Lachnospiraceae_unclassified	Lachnospiraceae_unclassified
Otu01435	17	Bacteria	Firmicutes	Clostridia	Clostridiales	Ruminococcaceae	Ruminococcaceae_unclassified	Ruminococcaceae_unclassified
Otu01436	17	Bacteria	Firmicutes	Clostridia	Clostridiales	Lachnospiraceae	Dorea	longicatena
Otu01437	17	Bacteria	Firmicutes	Negativicutes	Acidaminococcales	Acidaminococcaceae	Phascolarctobacterium	faecium
Otu01438	17	Bacteria	Bacteria_unclassified	Bacteria_unclassified	Bacteria_unclassified	Bacteria_unclassified	Bacteria_unclassified	Bacteria_unclassified
Otu01439	17	Bacteria	Proteobacteria	Betaproteobacteria	Burkholderiales	Sutterellaceae	Parasutterella	excrementihominis
Otu01440	17	Bacteria	Bacteroidetes	Bacteroidia	Bacteroidales	Bacteroidaceae	Phocaeicola	vulgatus
Otu01441	17	Bacteria	Bacteroidetes	Bacteroidia	Bacteroidales	Bacteroidaceae	Phocaeicola	vulgatus
Otu01442	17	Bacteria	Firmicutes	Clostridia	Clostridiales	Clostridiaceae 1	Clostridium sensu stricto	Clostridium sensu stricto_unclassified
Otu01443	17	Bacteria	Firmicutes	Clostridia	Clostridiales	Lachnospiraceae	Anaerotignum	lactatifermentans
Otu01444	17	Bacteria	Actinobacteria	Actinobacteria	Bifidobacteriales	Bifidobacteriaceae	Bifidobacterium	Bifidobacterium_unclassified
Otu01445	17	Bacteria	Firmicutes	Clostridia	Clostridiales	Lachnospiraceae	Anaerotignum	Anaerotignum_unclassified
Otu01446	17	Bacteria	Firmicutes	Clostridia	Clostridiales	Ruminococcaceae	Ruminococcaceae_unclassified	Ruminococcaceae_unclassified
Otu01447	17	Bacteria	Firmicutes	Clostridia	Clostridiales	Lachnospiraceae	Blautia	Blautia_unclassified
Otu01448	17	Bacteria	Bacteroidetes	Bacteroidia	Bacteroidales	Bacteroidaceae	Phocaeicola	vulgatus
Otu01449	17	Bacteria	Bacteroidetes	Bacteroidia	Bacteroidales	Bacteroidaceae	Phocaeicola	vulgatus
Otu01450	17	Bacteria	Firmicutes	Clostridia	Clostridiales	Ruminococcaceae	Ruminococcaceae_unclassified	Ruminococcaceae_unclassified
Otu01451	17	Bacteria	Firmicutes	Clostridia	Clostridiales	Lachnospiraceae	Blautia	Blautia_unclassified
Otu01452	17	Bacteria	Firmicutes	Clostridia	Clostridiales	Lachnospiraceae	Blautia	wexlerae
Otu01453	17	Bacteria	Bacteria_unclassified	Bacteria_unclassified	Bacteria_unclassified	Bacteria_unclassified	Bacteria_unclassified	Bacteria_unclassified
Otu01454	17	Bacteria	Firmicutes	Clostridia	Clostridiales	Ruminococcaceae	Ruminococcaceae_unclassified	Ruminococcaceae_unclassified
Otu01455	17	Bacteria	Firmicutes	Clostridia	Clostridiales	Lachnospiraceae	Blautia	Blautia_unclassified
Otu01456	17	Bacteria	Firmicutes	Clostridia	Clostridiales	Lachnospiraceae	Lachnospiraceae_unclassified	Lachnospiraceae_unclassified
Otu01457	17	Bacteria	Firmicutes	Firmicutes_unclassified	Firmicutes_unclassified	Firmicutes_unclassified	Firmicutes_unclassified	Firmicutes_unclassified
Otu01458	17	Bacteria	Firmicutes	Clostridia	Clostridiales	Lachnospiraceae	Blautia	luti
Otu01459	17	Bacteria	Bacteroidetes	Bacteroidia	Bacteroidales	Bacteroidaceae	Phocaeicola	vulgatus
Otu01460	17	Bacteria	Actinobacteria	Actinobacteria	Bifidobacteriales	Bifidobacteriaceae	Bifidobacterium	adolescentis
Otu01461	17	Bacteria	Firmicutes	Clostridia	Clostridiales	Lachnospiraceae	Mediterraneibacter	Mediterraneibacter_unclassified
Otu01462	17	Bacteria	Firmicutes	Clostridia	Clostridiales	Ruminococcaceae	Clostridium IV	Clostridium IV_unclassified
[truncated: 97,819 more rows]
