# Supplementary material for: Protein combined with certain dietary fibers increases butyrate production in gut microbiota fermentation
Source: Royal Society of Chemistry journal article supplement (doi:10.1039/d3fo04187e), 2024-01-01
Supplement: d3fo04187e2.pdf [file d3fo04187e2.pdf]

Supplementary Table 1. Effective test for SCFA, BCFA and ammonia with *p*-value after significant ANOVA. The BCFA test was performed on mM/gram protein basis data.

| Effect                | <i>p</i> -value |             |             |            |
|-----------------------|-----------------|-------------|-------------|------------|
|                       | Total SCFAs     | Acetate     | Propionate  | Butyrate   |
| Fiber Source (S)      | 1.0000          | 1.0000      | 1.0000      | 1.0000     |
| Fiber Inclusion (I)   | < 0.0001 *      | < 0.0001 *  | < 0.0001 *  | < 0.0001 * |
| S x I                 | < 0.0001 *      | < 0.0001 *  | < 0.0001 *  | < 0.0001 * |
| Fermentation Time (T) | < 0.0001 *      | < 0.0001 *  | < 0.0001 *  | < 0.0001 * |
| S x T                 | 1.0000          | 1.0000      | 1.0000      | 1.0000     |
| I x T                 | 0.0001          | 0.0005 *    | < 0.0001 *  | < 0.0001 * |
| S x I x T             | < 0.0001 *      | < 0.0001 *  | < 0.0001 *  | < 0.0001 * |
| Effect                | <i>p</i> -value |             |             |            |
|                       | Total BCFAs     | Isobutyrate | Isovalerate | Ammonia    |
| Fiber Source (S)      | 1.0000          | 1.0000      | 1.0000      | 1.0000     |
| Fiber Inclusion (I)   | < 0.0001 *      | 0.0234 *    | < 0.0001 *  | < 0.0001 * |
| S x I                 | < 0.0001 *      | < 0.0001 *  | < 0.0001 *  | < 0.0001 * |
| Fermentation Time (T) | 0.0028 *        | 0.1844      | 0.0002 *    | < 0.0001 * |
| S x T                 | 1.0000          | 1.0000      | 1.0000      | 1.0000     |
| I x T                 | 0.0035 *        | < 0.0001 *  | 0.0147 *    | < 0.0001 * |
| S x I x T             | < 0.0001 *      | < 0.0001 *  | < 0.0001 *  | 0.6316     |

Supplementary Table 2. PERMENOVA test revealing beta-diversity statistics

| Pairs of protein levels | Df | SumsOfSqs  | F.Model    | R2         | p.value | p.adjusted | sig |
|-------------------------|----|------------|------------|------------|---------|------------|-----|
| 0 vs 100                | 1  | 1.07028526 | 15.7826056 | 0.30478585 | 1e-04   | 0.001      | **  |
| 0 vs 25                 | 1  | 0.46381923 | 6.00515102 | 0.12509389 | 4e-04   | 0.004      | *   |
| 0 vs 50                 | 1  | 0.60246979 | 8.18657927 | 0.15993605 | 3e-04   | 0.003      | *   |
| 0 vs 75                 | 1  | 0.92742404 | 14.0558445 | 0.25074717 | 1e-04   | 0.001      | **  |
| 100 vs 25               | 1  | 0.80382521 | 11.9574804 | 0.42770236 | 2e-04   | 0.002      | *   |
| 100 vs 50               | 1  | 0.5297897  | 9.04168406 | 0.34720044 | 2e-04   | 0.002      | *   |
| 100 vs 75               | 1  | 0.25698266 | 6.82051422 | 0.29887645 | 1e-04   | 0.001      | **  |
| 25 vs 50                | 1  | 0.09093938 | 1.16281862 | 0.0481243  | 0.3136  | 1          |     |
| 25 vs 75                | 1  | 0.35418494 | 5.54404745 | 0.20127933 | 1e-04   | 0.001      | **  |
| 50 vs 75                | 1  | 0.12099498 | 2.09869667 | 0.08361775 | 0.0604  | 0.604      |     |
| Pairs of fibers         | Df | SumsOfSqs  | F.Model    | R2         | p.value | p.adjusted | sig |
| FOS vs WBPS             | 1  | 0.79410579 | 19.9391527 | 0.47543051 | 1e-04   | 0.0015     | *   |
| FOS vs Pec              | 1  | 1.18921028 | 28.4970746 | 0.5643312  | 1e-04   | 0.0015     | *   |
| FOS vs EM               | 1  | 0.52756886 | 14.6962438 | 0.38985963 | 1e-04   | 0.0015     | *   |
| WBPS vs Pec             | 1  | 1.04686598 | 23.5353759 | 0.51685915 | 1e-04   | 0.0015     | *   |
| WBPS vs EM              | 1  | 0.56728935 | 14.7239904 | 0.3903084  | 1e-04   | 0.0015     | *   |
| Pec vs EM               | 1  | 0.43880317 | 10.8749417 | 0.32103204 | 1e-04   | 0.0015     | *   |
